# Supplementary material for: Site-selective amination and/or nitrilationviametal-free C(sp2)–C(sp3) cleavage of benzylic and allylic alcohols
Source: Royal Society of Chemistry journal article supplement (doi:10.1039/d2sc00758d), 2022-01-01

Supplementary Information

**Site-Selective Amination and/or Nitrilation via Metal-Free, C(sp<sup>2</sup>)-C(sp<sup>3</sup>)  
Cleavage of Benzylic and Allylic Alcohols**

Raghunath Reddy Anugu\* and John R. Falck

*Division of Chemistry, Departments of Biochemistry and Pharmacology, University of Texas  
Southwestern Medical Center, Dallas, TX 75390, USA*

\*Corresponding author. anugu.raghunathreddy@utsouthwestern.edu

**TABLE OF CONTENTS**

|                                                          |                     |
|----------------------------------------------------------|---------------------|
| <b>Materials and Methods</b> .....                       | <b>SI-2</b>         |
| <b>General Procedures</b> .....                          | <b>SI-2-32</b>      |
| - <i>Ketone Reductions</i>                               |                     |
| - <i>Benzyl Alcohol Bis-Functionalization</i>            |                     |
| - <i>Site-Selective Amination of Benzyl Alcohol</i>      |                     |
| - <i>N-Heterocyclic Synthesis</i>                        |                     |
| - <i>Allyl alcohol Nitrilization</i>                     |                     |
| <b>Experimental Procedures and Analytical Data</b> ..... | <b>SI-2–SI-32</b>   |
| <b>Optimization Exp</b> .....                            | <b>SI-9–SI-11</b>   |
| - <i>Base Screening (Table S1)</i>                       |                     |
| - <i>Solvent Screening (Table S2)</i>                    |                     |
| - <i>HOSA Stoichiometry Screen (Table S3)</i>            |                     |
| <b>Control Exp</b> .....                                 | <b>SI-11–SI-13</b>  |
| - <i>Open to atmosphere</i>                              |                     |
| - <i>TEMPO</i>                                           |                     |
| - <i>Carbocation confirmation</i>                        |                     |
| - <i>Photocatalysis (Table S4)</i>                       |                     |
| <b>References</b> .....                                  | <b>SI-36–SI-37</b>  |
| <b><sup>1</sup>H/<sup>13</sup>C NMR Spectra</b> .....    | <b>SI-37–SI-106</b> |

## Materials and Methods

Proton and carbon nuclear magnetic resonance ( $^1\text{H}$  and  $^{13}\text{C}$  NMR) spectra were obtained on a Varian Inova 400 spectrometer at 400 MHz and 101 MHz, respectively, or a Varian Inova 500 at 500 MHz and 126 MHz, respectively, in  $\text{CDCl}_3$ , unless otherwise stated. The  $^1\text{H}$  and  $^{13}\text{C}$  NMR chemical shifts were measured relative to residual  $\text{CHCl}_3$  as the internal reference ( $^1\text{H}$ :  $\delta = 7.26$  ppm;  $^{13}\text{C}$ :  $\delta = 77.00$  ppm), unless otherwise stated.  $^1\text{H}$  NMR data are reported as chemical shift (ppm), multiplicity (s = singlet, br s = broad singlet, d = doublet, t = triplet, q = quartet, app q = apparent quartet, p = pentet, app p = apparent pentet, m = multiplet), and coupling constant (Hz). High resolution mass spectra (HRMS) were obtained using a TripleTOF<sup>®</sup> 6600 Quadrupole mass spectrometer. Melting points were measured using an OptiMelt (Stanford Research Systems) and are uncorrected. Analytical thin layer chromatography (TLC) used EMD Chemicals TLC silica gel 60 F<sub>254</sub> plates (0.040-0.063 mm) with visualization by UV light and/or  $\text{KMnO}_4$ , phosphomolybdic acid (PMA) and/or ninhydrin solution(s) followed by heating. Chromatographic purifications utilized flash chromatography using pre-packed  $\text{SiO}_2$  columns on a medium pressure, automated chromatograph equipped with a UV detector. Unless otherwise noted, yields refer to isolated, purified material whose spectral data were consistent with assigned structures or, if known, were in agreement with literature values. All reactions were conducted under an argon atmosphere in oven-dried glassware with magnetic stirring, unless otherwise stated. Reagents were purchased at the highest commercial quality and used without further purification. Reaction solvents were purified via passage through activated, neutral alumina columns and stored under argon. Hydroxylamine-*O*-sulfonic acid (HOSA) was purchased from Aldrich Chem. Co. while 1,1,1,3,3,3-hexafluoro-2-propanol (HFIP) was purchased from Oakwood Chemicals and used without purification.

## Experimental Procedures and Analytical Data

### General Procedure for Ketone Reductions

To a stirring, 0 °C solution of ketone (1 equiv) in MeOH (0.5 M) or mixture of THF/MeOH was slowly added  $\text{NaBH}_4$  (2 equiv) portionwise. After 10 min, the reaction mixture was warmed to rt and maintained until all ketone was consumed (2-16 h). All volatiles were removed *in vacuo* and the residue was purified using a commercial pre-packed  $\text{SiO}_2$  column on a medium pressure, automated chromatograph using EtOAc/hexanes to furnish the benzyl alcohol in the indicated yield.

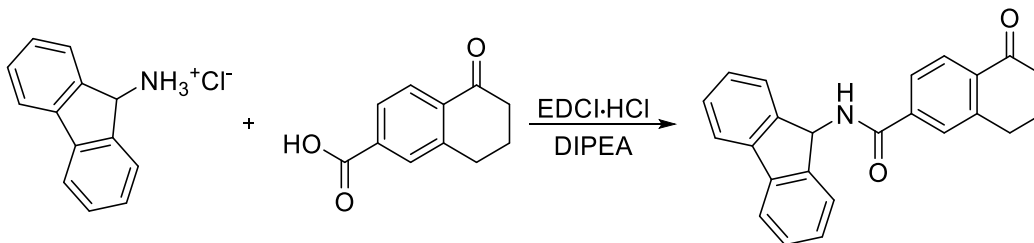

***N*-(9*H*-Fluoren-9-yl)-5-oxo-5,6,7,8-tetrahydronaphthalene-2-carboxamide:** EDCI hydrochloride (241 mg, 1.263 mmol) was added to a 0 °C solution of 6-amino-3,4-dihydronaphthalen-1(2*H*)-one hydrochloride (274 mg, 1.263 mmol) and 5-oxo-5,6,7,8-tetrahydronaphthalene-2-carboxylic acid (200 mg, 5.357 mmol) in  $\text{CH}_2\text{Cl}_2$  (5 mL) followed by DIPEA (548  $\mu\text{L}$ , 3.156 mmol). After stirring at rt for 16 h, the reaction mixture was concentrated *in vacuo* and the residue was purified chromatographically using 40% EtOAc/hexanes to give *N*-

(9*H*-fluoren-9-yl)-5-oxo-5,6,7,8-tetrahydronaphthalene-2-carboxamide (267 mg, 72%) as a white solid, mp 119-121 °C. TLC:  $R_f \approx 0.7$  (50% EtOAc/hexanes).  $^1\text{H}$  NMR (400 MHz,  $\text{CDCl}_3$ )  $\delta$  8.05 (d,  $J = 8.1$  Hz, 1H), 7.80–7.58 (m, 5H), 7.43 (td,  $J = 7.6, 1.2$  Hz, 2H), 7.33 (td,  $J = 7.4, 1.2$  Hz, 2H), 6.44–6.38 (m, 2H), 3.01 (t,  $J = 6.1$  Hz, 2H), 2.67 (dd,  $J = 7.3, 5.7$  Hz, 2H), 2.15 (p,  $J = 6.4$  Hz, 2H);  $^{13}\text{C}$  NMR (101 MHz,  $\text{CDCl}_3$ )  $\delta$  197.79, 167.50, 145.01, 144.19, 140.87, 138.24, 134.88, 129.08, 128.18, 128.06, 127.81, 125.39, 124.91, 120.28, 55.35, 39.22, 29.81, 23.18. HRMS (ESI,  $m/z$ ): calcd. for  $[\text{M}+\text{H}]^+$ ,  $\text{C}_{24}\text{H}_{21}\text{NO}_2^+$  356.1645; found, 356.1642.

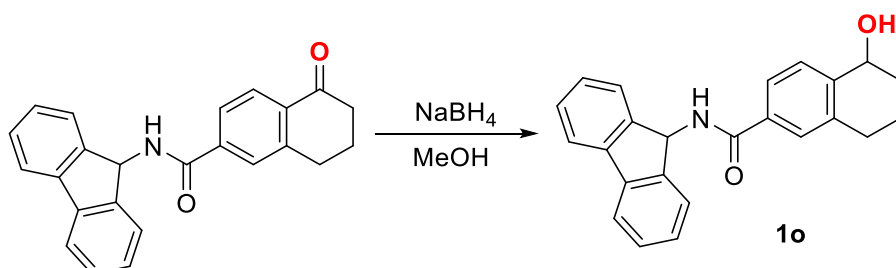

***N*-(9*H*-Fluoren-9-yl)-5-hydroxy-5,6,7,8-tetrahydronaphthalene-2-carboxamide (**1o**):**

Following the general benzyl alcohol procedure, *N*-(9*H*-fluoren-9-yl)-5-oxo-5,6,7,8-tetrahydronaphthalene-2-carboxamide (100 mg, 0.141 mmol),  $\text{NaBH}_4$  (10 mg, 0.283 mmol) were stirred at 0 °C to rt in 2:1 mixture of MeOH : THF (4 mL) for 4 h. Chromatographic purification of the crude product afforded *N*-(9*H*-fluoren-9-yl)-5-hydroxy-5,6,7,8-tetrahydronaphthalene-2-carboxamide (**1o**) (80 mg, 80%) as a viscous oil TLC:  $R_f \approx 0.4$  (50% EtOAc/hexanes).  $^1\text{H}$  NMR (400 MHz,  $\text{CDCl}_3$ )  $\delta$  7.73 (d,  $J = 7.6$  Hz, 2H), 7.66–7.56 (m, 4H), 7.51 (d,  $J = 7.8$  Hz, 1H), 7.42 (t,  $J = 7.5$  Hz, 2H), 7.32 (td,  $J = 7.5, 1.1$  Hz, 2H), 6.46 (d,  $J = 8.9$  Hz, 1H), 6.35 (d,  $J = 8.9$  Hz, 1H), 4.79 (t,  $J = 5.3$  Hz, 1H), 2.91–2.69 (m, 2H), 2.10–1.73 (m, 4H), 1.63 (br s, 1H).  $^{13}\text{C}$  NMR (151 MHz,  $\text{CDCl}_3$ )  $\delta$  168.07, 144.51, 142.78, 140.83, 137.80, 133.24, 128.95, 128.91, 128.02, 128.01, 125.42, 124.70, 120.21, 68.15, 55.23, 32.36, 29.34, 19.03. HRMS (ESI,  $m/z$ ): calcd. for  $[\text{M}+\text{H}]^+$ ,  $\text{C}_{24}\text{H}_{19}\text{NO}_2^+$  354.1489; found, 354.1488.

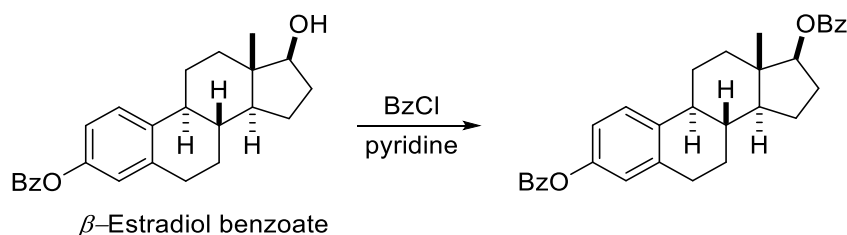

**(8*R*,9*S*,13*S*,14*S*,17*S*)-13-methyl-7,8,9,11,12,13,14,15,16,17-decahydro-6*H*-cyclopenta[*a*]phenanthrene-3,17-diyl dibenzoate ( $\beta$ -estradiol dibenzoate):**

To a stirring solution of  $\beta$ -estradiol benzoate (300 mg, 0.797 mmol; Aldrich Chem. Co.) in pyridine (5 mL) was slowly added benzoyl chloride (138  $\mu\text{L}$ , 1.195 mmol) at 0 °C. After stirring at rt for 4 h, the reaction mixture was concentrated in *vacuo*, the residue was purified chromatographically using a gradient of 7-10% EtOAc/hexanes as eluent to give (8*R*,9*S*,13*S*,14*S*,17*S*)-13-methyl-7,8,9,11,12,13,14,15,16,17-decahydro-6*H*-cyclopenta[*a*]phenanthrene-3,17-diyl dibenzoate (310 mg, 81%) as a white solid, mp 134-135 °C (lit.<sup>1</sup> 134-135 °C), whose spectral data were in agreement with literature values.<sup>2</sup> TLC:  $R_f \approx 0.6$  (10% EtOAc/hexanes).

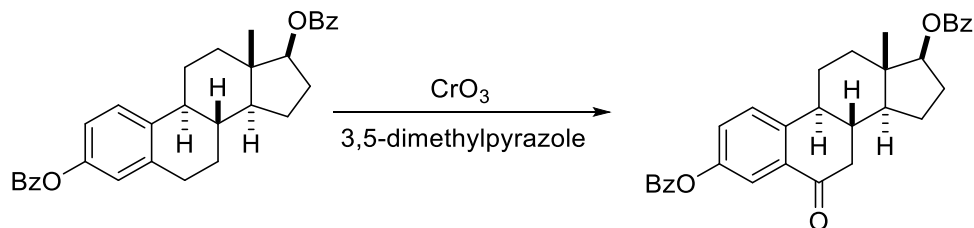

**(8R,9S,13S,14S,17S)-13-methyl-6-oxo-7,8,9,11,12,13,14,15,16,17-decahydro-6H-cyclopenta[a]phenanthrene-3,17-diyl dibenzoate:** To a stirring solution of chromic anhydride (416 mg, 4.166 mmol) in CH<sub>2</sub>Cl<sub>2</sub> (10 mL) was added 3,5-dimethylpyrazole (399 mg, 4.166 mmol) at rt.<sup>3</sup> After 15 min, the reaction mixture was cooled to 0 °C and a solution of 8R,9S,13S,14S,17S)-13-methyl-7,8,9,11,12,13,14,15,16,17-decahydro-6H-cyclopenta[a]phenanthrene-3,17-diyl dibenzoate (estradiol dibenzoate) (200 mg, 0.416 mmol) in CH<sub>2</sub>Cl<sub>2</sub> (5 mL) was added. After stirring at rt for 12 h, the reaction mixture was concentrated in *vacuo* and the residue was purified chromatographically using a gradient of 30–40% EtOAc/hexanes as eluent to give (8R,9S,13S,14S,17S)-13-methyl-6-oxo-7,8,9,11,12,13,14,15,16,17-decahydro-6H-cyclopenta[a]phenanthrene-3,17-diyl dibenzoate (86 mg, 42%) as a white solid, mp 157–159 °C, and unreacted estradiol dibenzoate (41 mg, 20%). TLC: R<sub>f</sub> ≈ 0.5 (20% EtOAc/hexanes). <sup>1</sup>H NMR (400 MHz, CDCl<sub>3</sub>) δ 8.20 (d, *J* = 7.4 Hz, 2H), 8.06 (d, *J* = 7.3 Hz, 2H), 7.90 (d, *J* = 2.6 Hz, 1H), 7.65 (t, *J* = 7.4 Hz, 1H), 7.61–7.36 (m, 7H), 4.99 (t, *J* = 8.4 Hz, 1H), 2.82 (dd, *J* = 16.9, 3.3 Hz, 1H), 2.62 (td, *J* = 11.1, 4.5 Hz, 1H), 2.49–2.24 (m, 3H), 2.15–1.98 (m, 2H), 1.90–1.39 (m, 6H), 1.01 (s, 3H); <sup>13</sup>C NMR (101 MHz, CDCl<sub>3</sub>) δ 196.93, 166.59, 165.25, 149.78, 144.43, 133.89, 133.87, 133.04, 130.67, 130.34, 129.68, 129.36, 128.75, 128.51, 127.26, 126.93, 120.24, 82.78, 49.95, 44.01, 43.30, 43.19, 39.72, 36.69, 27.73, 25.52, 23.27, 12.31. HRMS (ESI, *m/z*): calcd. for [M+H]<sup>+</sup>, C<sub>32</sub>H<sub>30</sub>O<sub>5</sub><sup>+</sup> 495.2166; found, 495.2167.

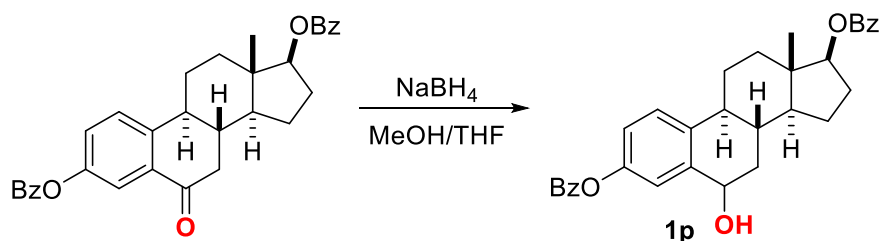

**(8R,9S,13S,14S,17S)-6-hydroxy-13-methyl-7,8,9,11,12,13,14,15,16,17-decahydro-6H-cyclopenta[a]phenanthrene-3,17-diyl dibenzoate (1p):** Following the general ketone reduction procedure, (8R,9S,13S,14S,17S)-13-methyl-6-oxo-7,8,9,11,12,13,14,15,16,17-decahydro-6H-cyclopenta[a]phenanthrene-3,17-diyl dibenzoate (40 mg, 0.080 mmol) and NaBH<sub>4</sub> (3.6 mg, 0.097 mmol) were stirred at rt in a mixture of MeOH/THF (2 mL, 1:1) for 2 h. Chromatographic purification of the crude product afforded (8R,9S,13S,14S,17S)-6-hydroxy-13-methyl-7,8,9,11,12,13,14,15,16,17-decahydro-6H-cyclopenta[a]phenanthrene-3,17-diyl dibenzoate (36 mg, 91%, mixture of diastereomers) (**1p**) as a viscous oil. TLC: R<sub>f</sub> ≈ 0.5 (20% EtOAc/hexanes). <sup>1</sup>H NMR (400 MHz, CDCl<sub>3</sub>) δ 8.20 (d, *J* = 7.7 Hz, 2H), 8.06 (d, *J* = 7.7 Hz, 2H), 7.64 (t, *J* = 7.5 Hz, 1H), 7.60–7.40 (m, 6H), 7.35 (d, *J* = 8.6 Hz, 1H), 7.14–7.02 (m, 1H), 5.05–4.79 (m, 2H), 2.50–2.25 (m, 4H), 2.08–1.94 (m, 1H), 1.90–1.63 (m, 4H), 1.61–1.34 (m, 5H), 1.00 (s, 3H); <sup>13</sup>C NMR (101 MHz, CDCl<sub>3</sub>) δ 166.65, 165.56, 149.48, 141.29, 137.66, 133.71, 132.98, 130.73, 130.29, 129.67, 128.68, 128.48, 126.64, 120.80, 120.41, 83.11, 69.86, 49.35, 44.59, 43.39, 38.09, 37.86,

37.01, 36.15, 34.79, 32.77, 31.72, 29.19, 27.82, 26.16, 25.41, 23.48, 20.84, 14.27, 12.44. HRMS (ESI,  $m/z$ ): calcd. for  $[M+H]^+$ ,  $C_{32}H_{32}O_5^+$  519.2142; found, 519.2143.

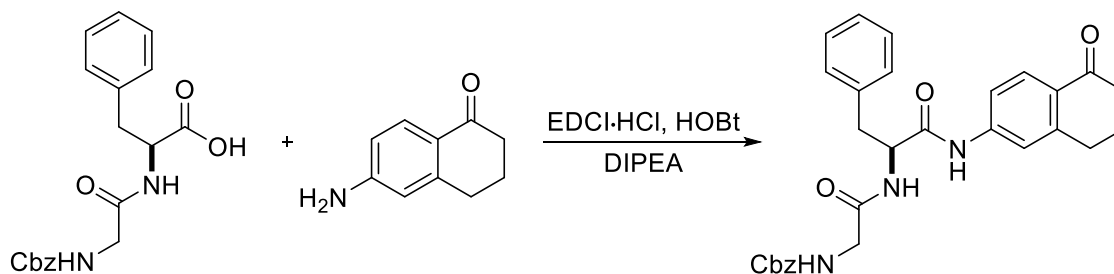

**Benzyl (S)-(2-oxo-2-((1-oxo-1-((5-oxo-5,6,7,8-tetrahydronaphthalen-2-yl)amino)-3-phenylpropan-2-yl)amino)ethyl)carbamate (1s):** EDCI hydrochloride (284 mg, 1.490 mmol) and hydroxybenzotriazole (HOBT) (201 mg, 1.490 mmol) were added to a 0 °C solution of 6-amino-3,4-dihydronaphthalen-1(2H)-one (274 mg, 1.263 mmol) and ((benzyloxy)carbonyl)glycyl-*L*-phenylalanine (530 mg, 1.490 mmol) in  $CH_2Cl_2$  (5 mL) followed by DIPEA (647  $\mu$ L, 3.726 mmol). After stirring at rt for 24 h, the reaction mixture was concentrated in *vacuo* and the residue was purified chromatographically using EtOAc to give benzyl (S)-(2-oxo-2-((1-oxo-1-((5-oxo-5,6,7,8-tetrahydronaphthalen-2-yl)amino)-3-phenylpropan-2-yl)amino)ethyl)carbamate as a viscous oil (440 mg, 71%). TLC:  $R_f \approx 0.4$  (70% EtOAc/hexanes).  $^1H$  NMR (400 MHz,  $CDCl_3$ )  $\delta$  8.55 (d,  $J = 28.4$  Hz, 1H), 7.92 (dd,  $J = 8.6, 1.8$  Hz, 1H), 7.56 (s, 1H), 7.43–7.07 (m, 10H), 7.02–6.98 (m, 1H), 5.51 (t,  $J = 5.5$  Hz, 1H), 5.08 (s, 2H), 4.90–4.78 (m, 1H), 3.84 (d,  $J = 5.5$  Hz, 2H), 3.21–3.06 (m, 2H), 2.86 (t,  $J = 6.0$  Hz, 2H), 2.59 (t,  $J = 6.4$  Hz, 2H), 2.07 (p,  $J = 6.4$  Hz, 2H);  $^{13}C$  NMR (151 MHz,  $CDCl_3$ )  $\delta$  197.56, 169.66, 169.44, 157.06, 146.17, 141.98, 136.13, 136.11, 135.87, 129.34, 129.03, 128.99, 128.95, 128.77, 128.58, 128.25, 127.43, 127.39, 118.96, 118.03, 67.67, 55.33, 44.92, 39.06, 37.94, 30.06, 23.34. HRMS (ESI,  $m/z$ ): calcd. for  $[M+H]^+$ ,  $C_{29}H_{29}N_3O_5^+$  500.2180; found, 500.2190.

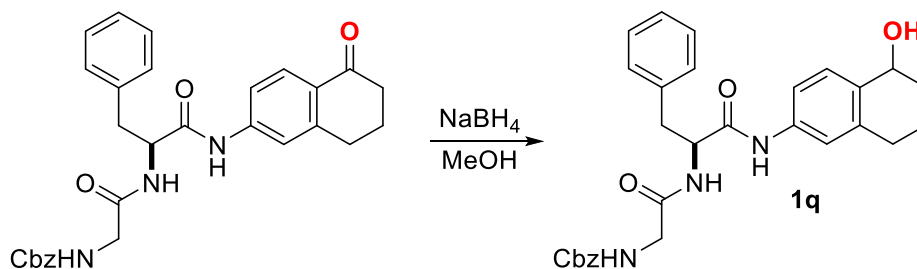

**Benzyl (2-(2S)-1-((5-hydroxy-5,6,7,8-tetrahydronaphthalen-2-yl)amino)-1-oxo-3-phenylpropan-2-yl)amino)-2-oxoethyl)carbamate (1q):** Following the general ketone reduction procedure, benzyl (S)-(2-oxo-2-((1-oxo-1-((5-oxo-5,6,7,8-tetrahydronaphthalen-2-yl)amino)-3-phenylpropan-2-yl)amino)ethyl)carbamate (60 mg, 0.120 mmol) and  $NaBH_4$  (8.8 mg, 0.240 mmol) were stirred in MeOH (2 mL). After 4 h, all volatiles were removed *in vacuo* and the residue was purified chromatographically to afford benzyl (2-(2S)-1-((5-hydroxy-5,6,7,8-tetrahydronaphthalen-2-yl)amino)-1-oxo-3-phenylpropan-2-yl)amino)-2-oxoethyl)carbamate (**1q**) (46 mg, 78%, mixture of diastereomers) as an oil. TLC:  $R_f \approx 0.6$  (pure EtOAc).  $^1H$  NMR (400 MHz,  $CDCl_3$ )  $\delta$  8.25 (d,  $J = 11.9$  Hz, 1H), 7.41–6.92 (m, 13H), 5.63–5.55 (m, 1H), 5.06 (s, 2H), 4.82 (q,  $J = 7.3$  Hz, 1H), 4.67 (t,  $J = 4.4$  Hz, 1H), 3.88–3.72 (m, 2H), 3.10 (t,  $J = 6.5$  Hz, 1H),

2.76–2.49 (m, 2H), 1.97–1.57 (m, 5H);  $^{13}\text{C}$  NMR (151 MHz,  $\text{CDCl}_3$ )  $\delta$  169.57, 169.16, 156.90, 138.06, 136.48, 136.38, 136.04, 135.36, 129.43, 128.90, 128.88, 128.72, 128.47, 128.27, 127.29, 120.45, 120.41, 118.43, 118.41, 118.39, 67.79, 67.50, 55.28, 44.72, 38.36, 32.34, 29.49, 29.46, 18.80, 18.77. HRMS (ESI,  $m/z$ ): calcd. for  $[\text{M}+\text{H}]^+$ ,  $\text{C}_{29}\text{H}_{31}\text{N}_3\text{O}_5^+$  502.2337; found, 502.2332.

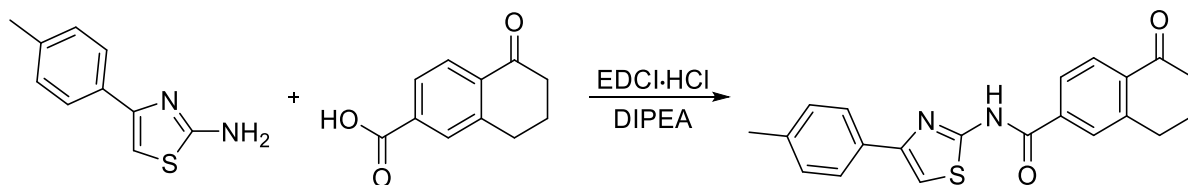

**5-Oxo-*N*-(4-(*p*-tolyl)thiazol-2-yl)-5,6,7,8-tetrahydronaphthalene-2-carboxamide:** EDCI hydrochloride (241 mg, 1.262 mmol) was added to a 0 °C solution of 4-(*p*-tolyl)thiazol-2-amine (299 mg, 1.578 mmol) and 5-oxo-5,6,7,8-tetrahydronaphthalene-2-carboxylic acid (200 mg, 1.052 mmol) in  $\text{CH}_2\text{Cl}_2$  (5 mL) followed by DIPEA (365  $\mu\text{L}$ , 0.357 mmol). After stirring at rt for 18 h, the reaction mixture was concentrated in *vacuo* and the residue was purified chromatographically using 40% EtOAc/hexanes to give 5-oxo-*N*-(4-(*p*-tolyl)thiazol-2-yl)-5,6,7,8-tetrahydronaphthalene-2-carboxamide (241 mg, 66%) as a yellow solid, mp 224–226 °C. TLC:  $R_f \approx 0.4$  (60% EtOAc/hexanes).  $^1\text{H}$  NMR (400 MHz,  $\text{CD}_3\text{OD} + \text{CDCl}_3$  2:1)  $\delta$  8.09 (d,  $J = 8.1$  Hz, 1H), 7.96–7.93 (m, 1H), 7.91 (dd,  $J = 8.1, 1.8$  Hz, 1H), 7.75 (d,  $J = 8.1$  Hz, 2H), 7.23 (s, 1H), 7.19 (d,  $J = 8.1$  Hz, 2H), 3.08 (t,  $J = 6.0$  Hz, 2H), 2.70 (t,  $J = 6.0$  Hz, 2H), 2.35 (s, 3H), 2.23–2.13 (m, 2H);  $^{13}\text{C}$  NMR (151 MHz,  $\text{CD}_3\text{OD} + \text{CDCl}_3$  2:1)  $\delta$  199.51, 146.00, 138.49, 137.34, 135.72, 132.39, 129.92, 129.44, 128.06, 126.59, 126.40, 107.96, 39.62, 30.14, 23.66, 21.34. HRMS (ESI,  $m/z$ ): calcd. for  $[\text{M}+\text{H}]^+$ ,  $\text{C}_{21}\text{H}_{18}\text{N}_2\text{O}_2\text{S}^+$  363.1162; found, 363.1162.

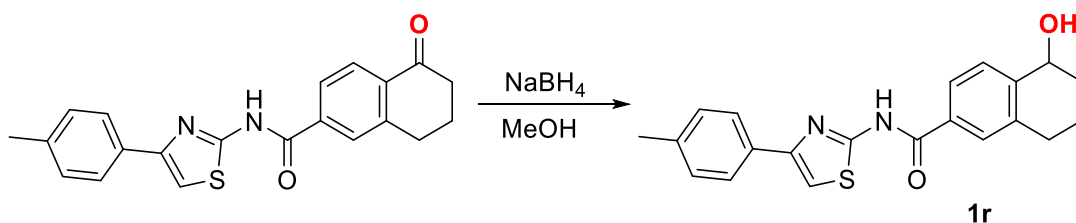

**5-Hydroxy-*N*-(4-(*p*-tolyl)thiazol-2-yl)-5,6,7,8-tetrahydronaphthalene-2-carboxamide (1r):** Following the general ketone reduction procedure, 5-oxo-*N*-(4-(*p*-tolyl)thiazol-2-yl)-5,6,7,8-tetrahydronaphthalene-2-carboxamide (100 mg, 0.287 mmol) and  $\text{NaBH}_4$  (15 mg, 0.431 mmol) were stirred in MeOH (4 mL). After 2 h, all volatiles were removed *in vacuo* and the residue was purified chromatographically to afford 5-hydroxy-*N*-(4-(*p*-tolyl)thiazol-2-yl)-5,6,7,8-tetrahydronaphthalene-2-carboxamide (**1r**) (76 mg, 77%) as an yellow oil. TLC:  $R_f \approx 0.4$  (80% EtOAc/hexanes).  $^1\text{H}$  NMR (400 MHz,  $\text{CD}_3\text{OD}$ )  $\delta$  7.85–7.79 (m, 3H), 7.78–7.75 (m, 1H), 7.60 (d,  $J = 8.1$  Hz, 1H), 7.33 (s, 1H), 7.21 (d,  $J = 7.9$  Hz, 1H), 4.76 (dd,  $J = 6.8, 4.1$  Hz, 1H), 2.95–2.75 (m, 2H), 2.10–1.96 (m, 2H), 1.92–1.75 (m, 2H);  $^{13}\text{C}$  NMR (151 MHz,  $\text{CD}_3\text{OD}$ )  $\delta$  167.57, 159.88, 151.54, 145.47, 139.04, 138.83, 133.31, 132.39, 130.26, 130.04, 129.51, 127.05, 126.32, 108.10, 68.59, 33.21, 30.25, 21.26, 20.26. HRMS (ESI,  $m/z$ ): calcd. for  $[\text{M}+\text{H}]^+$ ,  $\text{C}_{21}\text{H}_{20}\text{N}_2\text{O}_2^+$  365.1318; found, 365.1318.

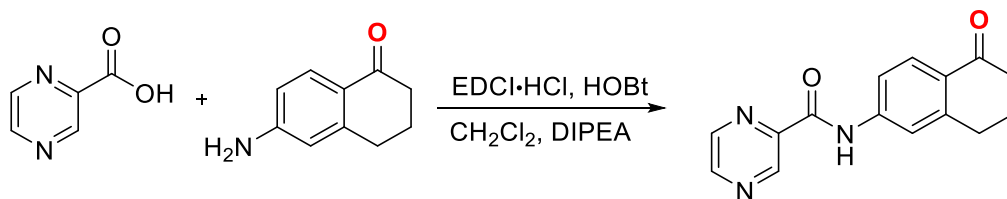

***N*-(5-Oxo-5,6,7,8-tetrahydronaphthalen-2-yl)pyrazine-2-carboxamide:** EDCI hydrochloride (284 mg, 1.490 mmol) and HOBT (201 mg, 3.726 mmol) were added to a 0 °C solution of 6-amino-3,4-dihydronaphthalen-1(2H)-one (200 mg, 1.242 mmol) and pyrazine-2-carboxylic acid (205 mg, 1.490 mmol) in CH<sub>2</sub>Cl<sub>2</sub> (5 mL) followed by DIPEA (647 μL, 3.726 mmol). After stirring at rt for 18 h, the reaction mixture was concentrated *in vacuo* and the residue was purified chromatographically using a gradient of 50-70% EtOAc/hexanes as eluent to give *N*-(5-oxo-5,6,7,8-tetrahydronaphthalen-2-yl)pyrazine-2-carboxamide as a viscous oil (1.1 g, 82%). TLC: R<sub>f</sub> ≈ 0.4 (60% EtOAc/hexanes). <sup>1</sup>H NMR (400 MHz, CDCl<sub>3</sub>) δ 9.81 (br s, 1H), 9.51 (d, *J* = 1.5 Hz, 1H), 8.84 (d, *J* = 2.5 Hz, 1H), 8.64–8.56 (m, 1H), 8.07 (d, *J* = 8.5 Hz, 1H), 7.91 (d, *J* = 1.5 Hz, 1H), 7.51 (dd, *J* = 8.5, 2.2 Hz, 1H), 3.00 (t, *J* = 6.1 Hz, 2H), 2.65 (t, *J* = 6.5 Hz, 2H), 2.15 (p, *J* = 6.3 Hz, 2H); <sup>13</sup>C NMR (151 MHz, CDCl<sub>3</sub>) δ 197.43, 161.04, 148.04, 146.50, 144.90, 144.03, 142.57, 141.52, 129.37, 128.93, 118.82, 117.90, 39.09, 30.15, 23.37. HRMS (ESI, *m/z*): calcd. for [M+H]<sup>+</sup>, C<sub>15</sub>H<sub>13</sub>N<sub>3</sub>O<sub>2</sub><sup>+</sup> 268.1103; found, 268.1081.

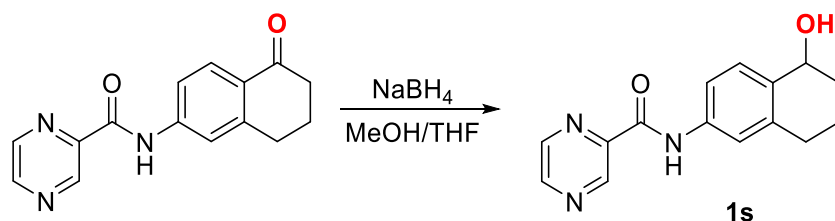

***N*-(5-Hydroxy-5,6,7,8-tetrahydronaphthalen-2-yl)pyrazine-2-carboxamide (1s):** Following the general ketone reduction procedure, *N*-(5-oxo-5,6,7,8-tetrahydronaphthalen-2-yl)pyrazine-2-carboxamide<sup>4</sup> (100 mg, 0.374 mmol) and NaBH<sub>4</sub> (27 mg, 0.748 mmol) were stirred at rt in MeOH/THF (4 mL, 1:1). After 2 h, all volatiles were removed *in vacuo* and the residue was purified chromatographically using EtOAc as eluant to afford *N*-(5-hydroxy-5,6,7,8-tetrahydronaphthalen-2-yl)pyrazine-2-carboxamide (**1s**) (75 mg, 75%) as a yellow solid, mp 150–152 °C. TLC: R<sub>f</sub> ≈ 0.4 (70% EtOAc/hexanes). <sup>1</sup>H NMR (400 MHz, CD<sub>3</sub>OD) δ 9.32 (s, 1H), 8.81 (d, *J* = 2.5 Hz, 1H), 8.73–8.71 (m, 1H), 7.62–7.52 (m, 2H), 7.42 (d, *J* = 8.3 Hz, 1H), 4.70 (dd, *J* = 6.2, 3.7 Hz, 1H), 2.91–2.66 (m, 2H), 2.06–1.70 (m, 4H); <sup>13</sup>C NMR (101 MHz, CD<sub>3</sub>OD) δ 163.09, 148.57, 146.51, 145.03, 144.58, 139.11, 137.76, 137.00, 130.47, 121.54, 119.53, 68.38, 33.47, 30.50, 20.09. HRMS (ESI, *m/z*): calcd. for [M+H]<sup>+</sup>, C<sub>15</sub>H<sub>15</sub>N<sub>3</sub>O<sub>2</sub><sup>+</sup> 270.1237; found, 270.1241.

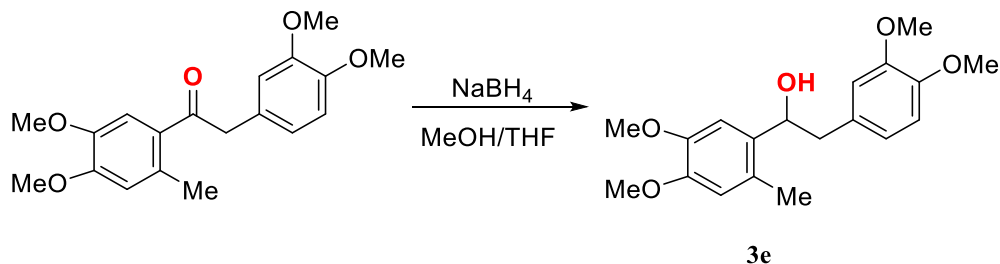

**1-(4,5-Dimethoxy-2-methylphenyl)-2-(3,4-dimethoxyphenyl)ethan-1-ol (3e):** Following the general ketone reduction procedure, 1-(4,5-dimethoxy-2-methylphenyl)-2-(3,4-dimethoxyphenyl)ethan-1-one<sup>5</sup> (100 mg, 0.316 mmol) and NaBH<sub>4</sub> (17 mg, 0.474 mmol) were stirred at rt in a mixture of MeOH/THF (4 mL, 3:1) for 2 h. Chromatographic purification of the crude product afforded methylphenyl)-2-(3,4-dimethoxyphenyl)ethan-1-ol (**3e**) (72 mg, 72%) as a viscous oil. TLC: R<sub>f</sub> ≈ 0.5 (20% EtOAc/hexanes). <sup>1</sup>H NMR (400 MHz, CDCl<sub>3</sub>) δ 7.04 (s, 1H), 6.78 (d, *J* = 8.1 Hz, 1H), 6.72 (dd, *J* = 8.0, 2.0 Hz, 1H), 6.62–6.57 (m, 2H), 5.02 (dd, *J* = 7.7, 5.2 Hz, 1H), 3.86 (s, 3H), 3.84 (s, 6H), 3.78 (s, 3H), 2.93–2.81 (m, 2H), 2.13 (s, 3H). <sup>13</sup>C NMR (101 MHz, CDCl<sub>3</sub>) δ 148.87, 147.87, 147.81, 147.45, 134.05, 130.74, 126.62, 121.53, 113.39, 112.86, 111.33, 108.91, 71.59, 56.09, 55.98, 55.96, 55.85, 44.80, 18.46. HRMS (ESI, *m/z*): calcd. for [M+Na]<sup>+</sup>, C<sub>19</sub>H<sub>24</sub>O<sub>5</sub><sup>+</sup> 355.1516; found, 356.1513.

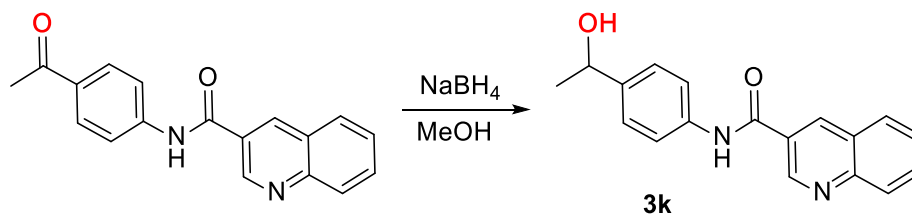

***N*-(4-(1-Hydroxyethyl)phenyl)quinoline-3-carboxamide (3k):** Following the general ketone reduction procedure, *N*-(4-acetylphenyl)quinoline-3-carboxamide (100 mg, 0.344 mmol) and NaBH<sub>4</sub> (19 mg, 0.517 mmol) were stirred in MeOH (2 mL). After 4 h, all volatiles were removed *in vacuo* and the residue was purified chromatographically to afford *N*-(4-(1-hydroxyethyl)phenyl)quinoline-3-carboxamide (**3k**) (80 mg, 80%) as a solid, mp 202–204 °C. <sup>1</sup>H NMR (400 MHz, CD<sub>3</sub>OD) δ 9.33 (d, *J* = 2.3 Hz, 1H), 8.93 (d, *J* = 2.3 Hz, 1H), 8.12 (dd, *J* = 8.3, 5.0 Hz, 2H), 7.91 (t, *J* = 7.7 Hz, 1H), 7.77–7.69 (m, 3H), 7.41 (d, *J* = 8.2 Hz, 2H), 4.88–4.81 (m, 1H), 1.46 (d, *J* = 6.5 Hz, 3H); <sup>13</sup>C NMR (151 MHz, CD<sub>3</sub>OD) δ 166.40, 149.97, 149.75, 144.21, 138.60, 137.94, 133.03, 130.40, 129.33, 129.23, 129.05, 128.48, 127.05, 122.11, 70.48, 25.56. HRMS (ESI, *m/z*): calcd. for [M+H]<sup>+</sup>, C<sub>18</sub>H<sub>16</sub>N<sub>2</sub>O<sub>2</sub><sup>+</sup> 293.1285; found, 293.1289.

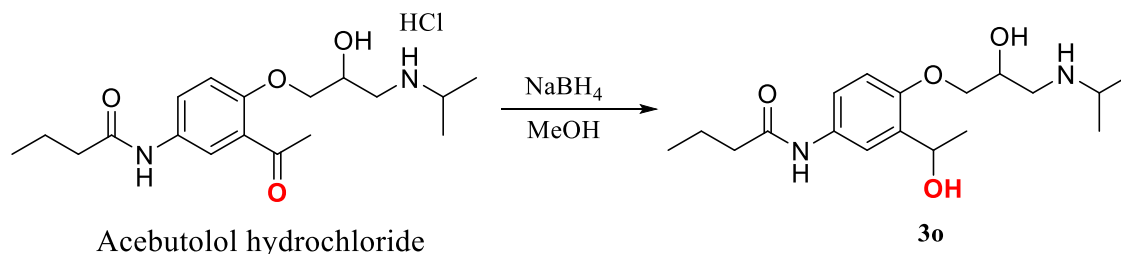



***N*-(4-(2-Hydroxy-3-(isopropylamino)propoxy)-3-(1-hydroxyethyl)phenyl)butyramide (3o):** Following the general ketone reduction procedure, Acebutolol hydrochloride (100 mg, 0.268 mmol) and NaBH<sub>4</sub> (14 mg, 0.402 mmol) were stirred at rt in a mixture of MeOH (2 mL) for 4 h. Chromatographic purification of the crude product afforded *N*-(4-(2-hydroxy-3-(isopropylamino)propoxy)-3-(1-hydroxyethyl)phenyl)butyramide (**3o**) (1:1 dr by <sup>13</sup>C NMR, 83 mg, 83%) as a viscous oil whose spectral data were in agreement with literature values.<sup>6</sup> TLC: R<sub>f</sub> ≈ 0.4 (20% MeOH/CH<sub>2</sub>Cl<sub>2</sub>). <sup>1</sup>H NMR (400 MHz, CD<sub>3</sub>OD) δ 7.53 (d, *J* = 2.6 Hz, 1H), 7.46 (dd, *J* = 8.7, 2.7 Hz, 1H), 6.89 (d, *J* = 8.8 Hz, 1H), 5.18 (q, *J* = 6.4 Hz, 1H), 4.12–4.07 (m, 1H), 4.02–3.91 (m, 2H), 3.35 (s, 1H), 2.92–2.80 (m, 2H), 2.74–2.65 (m, 1H), 2.32 (t, *J* = 7.4 Hz, 2H) 1.72 (q, *J* = 7.4 Hz, 2H), 1.42 (d, *J* = 6.5 Hz, 3H), 1.19 (s, 1H), 1.11 (d, *J* = 4.2 Hz, 6H), 1.00 (t, *J* = 7.4 Hz, 3H). <sup>13</sup>C NMR (101 MHz, CD<sub>3</sub>OD) δ 174.31, 153.32, 136.26, 136.25, 133.19, 121.40, 119.80, 119.78, 112.91, 112.87, 72.41, 72.40, 69.85, 69.80, 65.31, 65.26, 51.01, 50.98, 49.92, 49.91, 49.85, 39.74, 30.91, 24.01, 23.97, 22.60, 22.58, 22.43, 22.40, 20.41, 14.02.

### Optimization Experiments

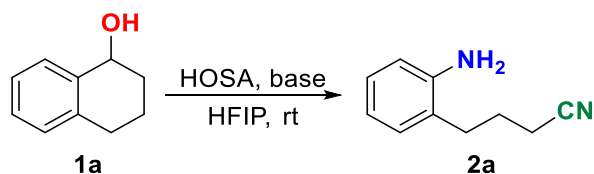

**Base Screening General Procedure:** To a stirring, 0 °C solution of HOSA (0.8 mmol, 2.5 equiv) in HFIP (2 mL) was added the indicated base (0.8 mmol, 2.5 equiv) under an argon atmosphere. After 15 min, **1a** (0.3 mmol, 1 equiv) was added and the reaction was continued at rt until complete consumption of **1a** (4–24 h, monitored by TLC). The reaction mixture was diluted with CH<sub>2</sub>Cl<sub>2</sub> (10 mL), washed with saturated aq. Na<sub>2</sub>CO<sub>3</sub> (10 mL), brine (10 mL), dried over anhydrous Na<sub>2</sub>SO<sub>4</sub>, and concentrated *in vacuo*. The crude residue was purified chromatographically using MeOH/CH<sub>2</sub>Cl<sub>2</sub> or EtOAc/hexanes as eluent to furnish **2a** in the indicated yield (Table S2).

**Table S2.** Base Screening.

| Entry    | Base                            | Time (h)  | Isolated Yield (%)                |
|----------|---------------------------------|-----------|-----------------------------------|
| <b>1</b> | <b>Et<sub>3</sub>N</b>          | <b>14</b> | <b>92</b>                         |
| 2        | <i>i</i> Pr <sub>2</sub> NEt    | 14        | 83                                |
| <b>3</b> | <b>CsOH</b>                     | <b>14</b> | <b>94</b>                         |
| 4        | Cs <sub>2</sub> CO <sub>3</sub> | 24        | 0 + ~90%SM                        |
| 5        | pyridine                        | 14        | 79%                               |
| 6        | DABCO                           | 14        | 83                                |
| 7        | DMAP                            | 14        | 85                                |
| 8        | NaOH                            | 14        | 84                                |
| 9        | -                               | 14        | 0 + mixture of non-polar products |

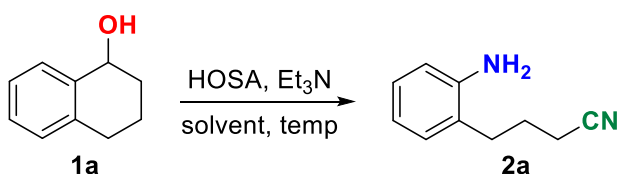

**Solvent Screening General Procedure:** To a stirring, 0 °C solution of HOSA (0.7 mmol, 2.2 equiv) in the indicated solvent (2 mL) was added Et<sub>3</sub>N (0.7 mmol, 2.2 equiv) under an argon atmosphere. After 15 min, **1a** (0.3 mmol, 1 equiv) was added and the reaction was continued until complete consumption of **1a** (monitored by TLC). The reaction mixture was diluted with CH<sub>2</sub>Cl<sub>2</sub> (10 mL), washed with saturated aq. Na<sub>2</sub>CO<sub>3</sub> (10 mL), brine (10 mL), dried over anhydrous Na<sub>2</sub>SO<sub>4</sub>, and concentrated *in vacuo*. The crude residue was purified chromatographically using MeOH/CH<sub>2</sub>Cl<sub>2</sub> or EtOAc/hexanes as eluent to furnish **2a** in the indicated yield (Table S3).

**Table S3.** Solvent Screen.

| Entry    | Solvent                         | Temp (°C)/Time (h) | Isolated Yield (%) |
|----------|---------------------------------|--------------------|--------------------|
| <b>1</b> | <b>HFIP</b>                     | <b>23/14</b>       | <b>92</b>          |
| 2        | CH <sub>2</sub> Cl <sub>2</sub> | 23-60/24           | <5                 |
| <b>3</b> | MeOH                            | 23-60/24           | <5                 |
| 4        | hexane                          | 23-60/24           | 0                  |
| 5        | TFE <sup>a</sup>                | 23-60/2            | 42                 |
| 6        | CH <sub>3</sub> CN              | 23-60/14           | 0                  |
| 7        | THF                             | 23-60/14           | 0                  |
| 8        | CHCl <sub>3</sub>               | 23-60/14           | <5                 |
| 9        | DMF                             | 23-60/14           | 0                  |

<sup>a</sup>2,2,2-Trifluoroethanol

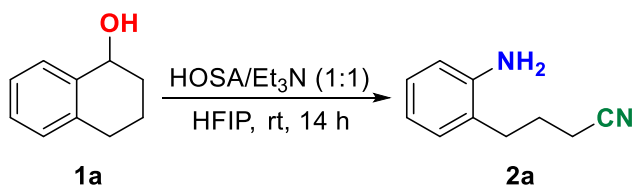

**Table S4.** HOSA Stoichiometry Optimization.

| Entry    | HOSA (equiv) | TEA (equiv) | Isolated Yield (%) |
|----------|--------------|-------------|--------------------|
| 1        | 2            | 2           | 83                 |
| <b>2</b> | <b>2.2</b>   | <b>2.2</b>  | <b>92</b>          |
| 3        | 2.5          | 2.5         | 92                 |

## Control Experiments

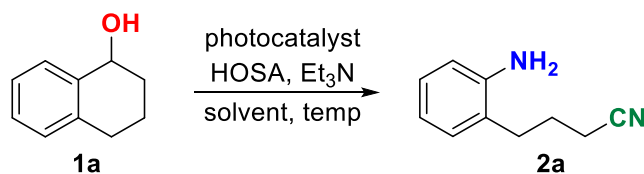

**General Photocatalysis Procedure:** To a stirring, 0 °C solution of HOSA (0.7 mmol, 2.5 equiv) in the indicated solvent (2 mL) was added Et<sub>3</sub>N (0.7 mmol, 2.5 equiv) under an argon atmosphere. After 15 min, **1a** (0.3 mmol, 1 equiv) and photocatalyst were added and the mixture exposed to blue LED light (260 nm) at rt, unless otherwise stated, until complete consumption of **1a** (4-24 h, monitored by TLC). The reaction mixture was diluted with CH<sub>2</sub>Cl<sub>2</sub> (10 mL), washed with saturated aq. Na<sub>2</sub>CO<sub>3</sub> (10 mL), brine (10 mL), dried over anhydrous Na<sub>2</sub>SO<sub>4</sub>, and concentrated *in vacuo*. The crude residue was purified chromatographically using MeOH/CH<sub>2</sub>Cl<sub>2</sub> or EtOAc/hexanes as eluent to furnish **2a** in the indicated yield (Table S1).

**Table S1.** Photocatalysis.

| Entry    | Catalyst                                                          | LED light<br>470 nm | Time (h)       | Solvent                         | Isolated Yield (%) |
|----------|-------------------------------------------------------------------|---------------------|----------------|---------------------------------|--------------------|
| 1        | Eosin-Y                                                           | +                   | 1              | HFIP                            | 70                 |
| 2        | [Ir{dF(CF <sub>3</sub> )ppy} <sub>2</sub> (dtbpy)]PF <sub>6</sub> | +                   | 1              | HFIP                            | 72                 |
| <b>3</b> | -                                                                 | -                   | <b>14</b>      | <b>HFIP</b>                     | <b>92</b>          |
| 4        | -                                                                 | -                   | 1 <sup>a</sup> | HFIP                            | 66                 |
| 5        | [Ir{dF(CF <sub>3</sub> )ppy} <sub>2</sub> (dtbpy)]PF <sub>6</sub> | +                   | 12             | HFIP/H <sub>2</sub> O (4:1)     | 29                 |
| 6        | [Ir{dF(CF <sub>3</sub> )ppy} <sub>2</sub> (dtbpy)]PF <sub>6</sub> | +                   | 24             | CH <sub>2</sub> Cl <sub>2</sub> | 0                  |

<sup>a</sup>60 °C. [Ir{dF(CF<sub>3</sub>)ppy}<sub>2</sub>(dtbpy)]PF<sub>6</sub> = [4,4'-bis(1,1-dimethylethyl)-2,2'-bipyridine-N<sup>1</sup>,N<sup>1'</sup>]bis[3,5-difluoro-2-[5-(trifluoromethyl)-2-pyridinyl-N]phenyl-C]iridium(III) hexafluorophosphate

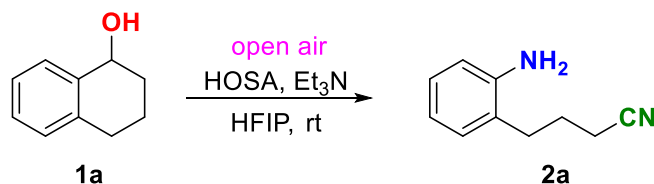

Following the general bis-functionalization procedure, **1** (50 mg, 0.337 mmol), Et<sub>3</sub>N (103 μL, 0.743 mmol), and HOSA (84 mg, 0.743 mmol) were stirred at rt in HFIP (2 mL) open to the atmosphere for 14 h. Chromatographic purification of the crude product afforded **2a** (44 mg, 81%) as an oil.

**Carbocation confirmation:**

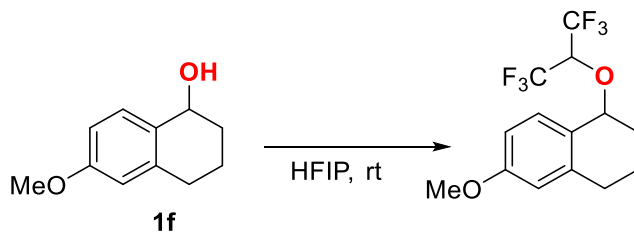

6-Methoxy-1,2,3,4-tetrahydronaphthalen-1-ol **1f** (50 mg, 0.280 mmol) was dissolved in HFIP (1.8 mL, 0.15M), stirred at rt for 12 h under an argon atmosphere. The reaction mixture was diluted with CH<sub>2</sub>Cl<sub>2</sub> (10 mL), washed with saturated aq. Na<sub>2</sub>CO<sub>3</sub> (10 mL), brine (10 mL), dried over anhydrous Na<sub>2</sub>SO<sub>4</sub>, and concentrated *in vacuo*. The crude residue was purified chromatographically using 3% EtOAc/hexanes as eluent to furnish 1-((1,1,1,3,3,3-hexafluoropropan-2-yl)oxy)-6-methoxy-1,2,3,4-tetrahydronaphthalene (72 mg, 79%) in the indicated yield. <sup>1</sup>H NMR (400 MHz, CDCl<sub>3</sub>) δ 7.25 (d, *J* = 8.4 Hz, 1H), 6.78 (dd, *J* = 8.5, 2.5 Hz, 1H), 6.67 (s, 1H), 4.77 (t, *J* = 3.5 Hz, 1H), 4.28 (p, *J* = 6.0 Hz, 1H), 3.80 (s, 3H), 2.93–2.62 (m, 2H), 2.22 – 1.95 (m, 2H), 1.90 – 1.67 (m, 2H). <sup>13</sup>C NMR (101 MHz, CDCl<sub>3</sub>) δ 159.90, 139.81, 131.61, 125.85, 113.76, 112.48, 79.14, 73.94, 73.62, 73.30, 72.98, 72.67, 55.35, 29.17, 27.99, 17.44.

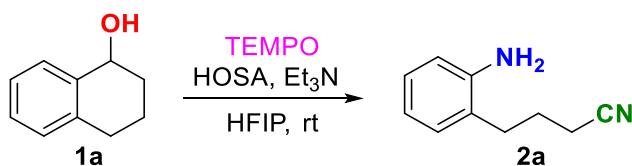

Following the general bis-functionalization procedure, **1** (50 mg, 0.337 mmol), Et<sub>3</sub>N (103 μL, 0.743 mmol), HOSA (84 mg, 0.743 mmol) and TEMPO (52 mg, 0.337 mmol, 1 equiv) were stirred at rt in HFIP (2 mL) for 14 h. Chromatographic purification of the crude product afforded **2a** (3 mg, 5%) as an oil and recovered **1** (45 mg, 90%).

Note: The decrease in yield caused by TEMPO is attributed to decomposition of the HOSA aminating agent induced by TEMPO and probably not due to radical trapping.

In a control experiment, aminating agent MsONHMe (50 mg, 0.218 mmol 1 equiv) and TEMPO (51 mg, 0.327 mmol, 1.5 equiv) were stirred at rt in HFIP (2 mL) for 14 h. Decomposition of the closely related aminating agent MsONHMe was observed by TLC. HOSA could not be observed by TLC, therefore we used MsONHMe.

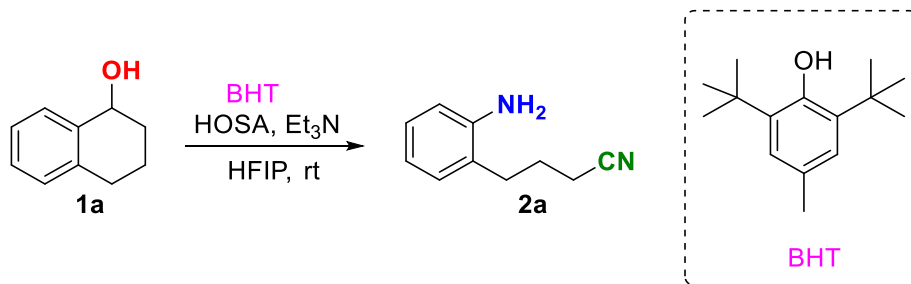

Following the general bis-functionalization procedure, **1a** (50 mg, 0.337 mmol), Et<sub>3</sub>N (103  $\mu$ L, 0.743 mmol), HOSA (84 mg, 0.743 mmol) and BHT (74 mg, 0.337 mmol, 1 equiv) were stirred at rt in HFIP (2 mL) for 14 h. Chromatographic purification of the crude product afforded **2a** (50 mg, 92%) as an oil. TLC: R<sub>f</sub>  $\approx$  0.5 (50% EtOAc/hexanes).

**Table 1 Experimental Procedures and Analytical Data**

**General procedure for bis-functionalization of cyclic benzylic alcohol:** Cyclic benzylic alcohol (1 equiv) was added to a stirring equimolar solution of HOSA and Et<sub>3</sub>N (2.2 equiv) at 0 °C in HFIP (0.15 M) under an argon atmosphere. After 15 min, the reaction mixture was warmed to rt-50 °C. After complete consumption (monitored via TLC), the rt reaction mixture was diluted with CH<sub>2</sub>Cl<sub>2</sub> (equal vol), washed with saturated aq. Na<sub>2</sub>CO<sub>3</sub>, brine, dried over anhydrous Na<sub>2</sub>SO<sub>4</sub>, and concentrated in vacuo. The crude residue was purified chromatographically using MeOH/CH<sub>2</sub>Cl<sub>2</sub> or EtOAc/hexanes as eluent to furnish the anilino-nitrile. Variations in reaction conditions are noted in the Table 1 legends for select substrates.

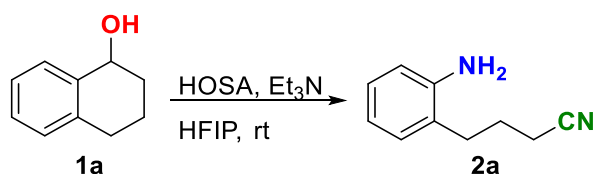

**4-(2-Aminophenyl)butanenitrile (2a):** Following the general benzyl alcohol bis-functionalization procedure, 1,2,3,4-tetrahydronaphthalen-1-ol (**1**) (50 mg, 0.337 mmol), Et<sub>3</sub>N (103  $\mu$ L, 0.743 mmol), and HOSA (84 mg, 0.743 mmol) were stirred at rt in HFIP (2 mL) for 14 h. Chromatographic purification of the crude product afforded **2a** (50 mg, 92%) as an oil. TLC: R<sub>f</sub>  $\approx$  0.5 (50% EtOAc/hexanes). <sup>1</sup>H NMR (400 MHz, CDCl<sub>3</sub>)  $\delta$  7.08 (td, *J* = 7.7, 1.5 Hz, 1H), 7.03 (dd, *J* = 7.5, 1.2 Hz, 1H), 6.75 (td, *J* = 7.4, 1.2 Hz, 1H), 6.70 (dd, *J* = 7.9, 1.0 Hz, 1H), 3.63 (br s, 2H), 2.67 (t, *J* = 7.4 Hz, 2H), 2.37 (t, *J* = 7.0 Hz, 2H), 2.00 (p, *J* = 7.1 Hz, 2H); <sup>13</sup>C NMR (101 MHz, CDCl<sub>3</sub>)  $\delta$  144.30, 129.80, 127.82, 123.89, 119.79, 119.03, 116.05, 29.97, 24.38, 16.74. HRMS (ESI, *m/z*): calcd. for [M+H]<sup>+</sup>, C<sub>10</sub>H<sub>12</sub>N<sub>2</sub><sup>+</sup> 161.1073; found, 161.1081.

**5 mmol scale:** **1a** (800 mg, 5.405 mmol), HOSA (1.34 g, 11.891 mmol), and Et<sub>3</sub>N (1.65 mL, 11.891 mmol) were stirred at rt in HFIP (32 mL) for 14 h. The residue was purified chromatographically using a gradient of 70-90% EtOAc/hexane to give **2a** (778 mg, 90%) as an oil.

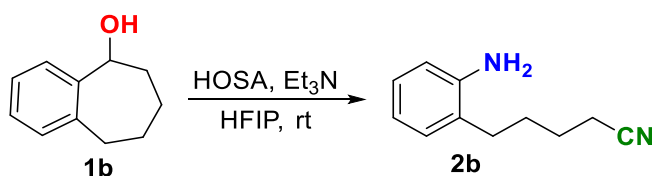

**5-(2-Aminophenyl)pentanenitrile (2b):** Following the general benzyl alcohol bis-functionalization procedure, 6,7,8,9-tetrahydro-5H-benzo[7]annulen-5-ol (50 mg, 0.308 mmol), Et<sub>3</sub>N (94  $\mu$ L, 0.679 mmol), and HOSA (76 mg, 0.679 mmol) were stirred at rt in HFIP (2 mL) for 12 h. Chromatographic purification of the crude product afforded **2b** (47 mg, 87%) as an oil. TLC: R<sub>f</sub>  $\approx$  0.5 (50% EtOAc/hexanes). <sup>1</sup>H NMR (400 MHz, CDCl<sub>3</sub>)  $\delta$  7.09–6.97 (m, 2H), 6.74 (td, *J* = 7.4, 1.2 Hz, 1H), 6.69 (dd, *J* = 8.0, 1.2 Hz, 1H), 3.62 (br s, 2H), 2.54 (t, *J* = 7.2 Hz, 2H), 2.37 (t, *J* = 6.8 Hz, 2H), 1.86–1.62 (m, 4H); <sup>13</sup>C NMR (101 MHz, CDCl<sub>3</sub>)  $\delta$  144.15, 129.56, 127.38, 125.36,

119.76, 118.91, 115.86, 30.47, 27.59, 25.15, 17.16. HRMS (ESI,  $m/z$ ): calcd. for  $[M+H]^+$ ,  $C_{11}H_{14}N_2^+$  175.1230; found, 175.1236.

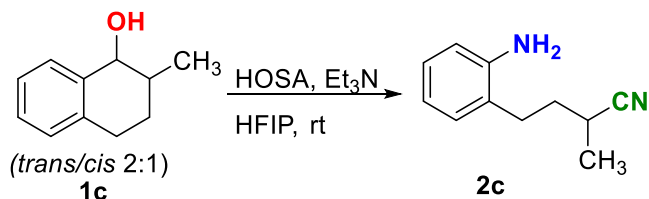

**4-(2-Aminophenyl)-2-methylbutanenitrile (2c):** Following the general benzyl alcohol bis-functionalization procedure, 2-methyl-1,2,3,4-tetrahydronaphthalen-1-ol<sup>7</sup> (50 mg, 0.308 mmol; 2:1 *trans/cis*-mixture),  $Et_3N$  (94  $\mu$ L, 0.308 mmol), and HOSA (76 mg, 0.308 mmol) were stirred at rt in HFIP (2 mL) for 14 h. Chromatographic purification of the crude product afforded **2c** (40 mg, 75%) as an oil. TLC:  $R_f \approx 0.4$  (50% EtOAc/hexanes).  $^1H$  NMR (400 MHz,  $CDCl_3$ )  $\delta$  7.10–7.01 (m, 2H), 6.75 (td,  $J = 7.4$ , 1.2 Hz, 1H), 6.69 (dd,  $J = 7.8$ , 1.2 Hz, 1H), 3.64 (br s, 2H), 2.79–2.72 (m, 1H), 2.69–2.58 (m, 2H), 1.99–1.82 (m, 2H), 1.36 (s, 3H);  $^{13}C$  NMR (101 MHz,  $CDCl_3$ )  $\delta$  144.26, 129.71, 127.76, 124.34, 123.06, 119.07, 116.04, 33.21, 28.87, 25.34, 18.13. HRMS (ESI,  $m/z$ ): calcd. for  $[M+H]^+$ ,  $C_{11}H_{14}N_2^+$  175.1230; found 175.1240.

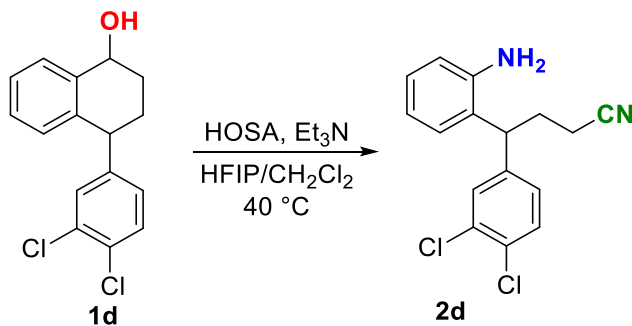

**4-(2-Aminophenyl)-4-(3,4-dichlorophenyl)butanenitrile (2d):** Following the general benzyl alcohol bis-functionalization procedure, 4-(3,4-dichlorophenyl)-1,2,3,4-tetrahydronaphthalen-1-ol<sup>8</sup> (50 mg, 0.179 mmol),  $Et_3N$  (55  $\mu$ L, 0.179 mmol), and HOSA (44 mg, 0.179 mmol) were stirred at 40 °C in a mixture (2 mL, 4:1) of HFIP (1.6 mL) and  $CH_2Cl_2$  for 12 h. Chromatographic purification of the crude product afforded **2d** (37 mg, 71%) as an oil. TLC:  $R_f \approx 0.5$  (40% EtOAc/hexanes).  $^1H$  NMR (400 MHz,  $CDCl_3$ )  $\delta$  7.31 (d,  $J = 8.3$  Hz, 1H), 7.23 (d,  $J = 2.2$  Hz, 1H), 7.12–6.96 (m, 3H), 6.79 (td,  $J = 7.5$ , 1.3 Hz, 1H), 6.63 (d,  $J = 8.1$  Hz, 1H), 3.96 (t,  $J = 7.5$  Hz, 1H), 3.54 (br s, 2H), 2.46–2.31 (m, 1H), 2.30–2.14 (m, 3H);  $^{13}C$  NMR (101 MHz,  $CDCl_3$ )  $\delta$  144.26, 142.41, 131.03, 129.80, 128.49, 127.40, 127.08, 125.63, 119.66, 119.28, 117.53, 43.67, 30.21, 15.86. HRMS (ESI,  $m/z$ ): calcd. for  $[M+H]^+$ ,  $C_{16}H_{14}Cl_2N_2O^+$  305.0608; found, 305.0613.

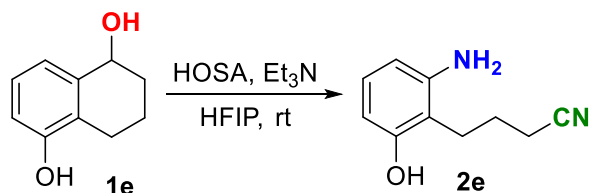

**4-(2-Amino-6-hydroxyphenyl)butanenitrile (2e):** Following the general benzyl alcohol bis-functionalization procedure, 1,2,3,4-tetrahydronaphthalen-1,5-diol (50 mg, 0.304 mmol), Et<sub>3</sub>N (93  $\mu$ L, 0.670 mmol), and HOSA (75 mg, 0.670 mmol) were stirred at rt in HFIP (2 mL) for 10 h. Chromatographic purification of the crude product afforded **2e** (38 mg, 71%) as a solid, mp 94-96  $^{\circ}$ C. TLC: R<sub>f</sub>  $\approx$  0.5 (50% EtOAc/hexanes). <sup>1</sup>H NMR (400 MHz, CDCl<sub>3</sub>)  $\delta$  6.87 (t, *J* = 8.0 Hz, 1H), 6.29 (d, *J* = 8.0 Hz, 1H), 6.20 (d, *J* = 7.9 Hz, 1H), 5.72 (br s, 1H), 3.71 (br s, 2H), 2.69 (t, *J* = 7.3 Hz, 2H), 2.37 (t, *J* = 7.2 Hz, 2H), 1.92 (p, *J* = 7.2 Hz, 2H); <sup>13</sup>C NMR (101 MHz, CDCl<sub>3</sub>)  $\delta$  154.85, 145.72, 127.76, 120.48, 111.54, 108.75, 106.03, 24.14, 22.86, 16.81. HRMS (ESI, *m/z*): calcd. for [M+H]<sup>+</sup>, C<sub>10</sub>H<sub>12</sub>N<sub>2</sub>O<sup>+</sup> 177.1022; found, 177.1027.

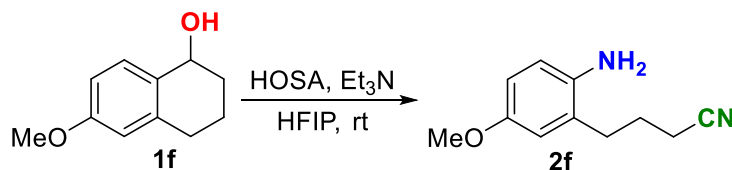

**4-(2-Amino-5-methoxyphenyl)butanenitrile (2f):** Following the general benzyl alcohol bis-functionalization procedure, 6-methoxy-1,2,3,4-tetrahydronaphthalen-1-ol (50 mg, 0.284 mmol), Et<sub>3</sub>N (87  $\mu$ L, 0.624 mmol), and HOSA (70 mg, 0.624 mmol) were stirred at rt in HFIP (2 mL) for 7 h. Chromatographic purification of the crude product afforded **2f** (32 mg, 61%) as an oil. TLC: R<sub>f</sub>  $\approx$  0.4 (50% EtOAc/hexanes). <sup>1</sup>H NMR (400 MHz, CDCl<sub>3</sub>)  $\delta$  6.67–6.60 (m, 3H), 3.74 (s, 3H), 3.37 (br s, 2H), 2.66 (t, *J* = 7.4 Hz, 2H), 2.38 (t, *J* = 7.0 Hz, 2H), 1.99 (p, *J* = 7.2 Hz, 2H); <sup>13</sup>C NMR (101 MHz, CDCl<sub>3</sub>)  $\delta$  153.06, 137.86, 125.74, 119.78, 117.36, 115.71, 112.97, 55.83, 30.33, 24.50, 16.80. HRMS (ESI, *m/z*): calcd. for [M+H]<sup>+</sup>, C<sub>11</sub>H<sub>14</sub>N<sub>2</sub>O<sup>+</sup> 191.1179; found, 191.1182.

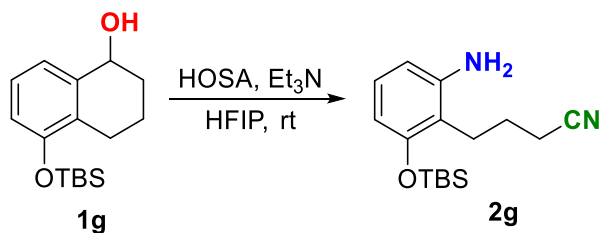

**4-(2-Amino-6-((tert-butyldimethylsilyl)oxy)phenyl)butanenitrile (2g):** Following the general benzyl alcohol bis-functionalization procedure, 5-((tert-butyldimethylsilyl)oxy)-1,2,3,4-tetrahydronaphthalen-1-ol<sup>9</sup> (50 mg, 0.179 mmol), Et<sub>3</sub>N (55  $\mu$ L, 0.179 mmol), and HOSA (44 mg, 0.179 mmol) were stirred at rt in HFIP (2 mL) for 14 h. Chromatographic purification of the crude product afforded **2g** (40 mg, 78%) as an oil. TLC: R<sub>f</sub>  $\approx$  0.5 (40% EtOAc/hexanes). <sup>1</sup>H NMR (400 MHz, CDCl<sub>3</sub>)  $\delta$  6.90 (t, *J* = 8.0 Hz, 1H), 6.30 (dd, *J* = 18.3, 8.0 Hz, 2H), 3.66 (br s, 2H), 2.67 (t, *J* = 7.5 Hz, 2H), 2.37 (t, *J* = 7.2 Hz, 2H), 1.91 (p, *J* = 7.3 Hz, 2H), 1.01 (s, 9H), 0.25 (s, 6H); <sup>13</sup>C NMR (101 MHz, CDCl<sub>3</sub>)  $\delta$  154.58, 145.95, 127.47, 115.31, 109.16, 109.07, 25.96, 24.37, 23.63, 18.37, 16.97, -3.98. HRMS (ESI, *m/z*): calcd. for [M+H]<sup>+</sup>, C<sub>16</sub>H<sub>26</sub>N<sub>2</sub>OSi<sup>+</sup> 291.1887; found 291.1889.

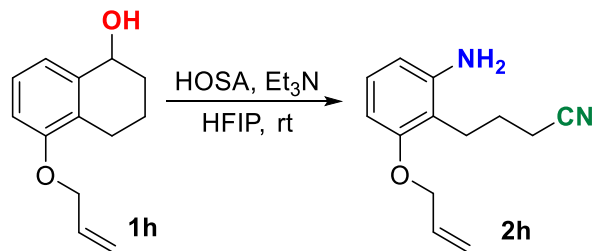

**4-(2-(Allyloxy)-6-aminophenyl)butanenitrile (2h):** Following the general benzyl alcohol bis-functionalization procedure, 5-(allyloxy)-1,2,3,4-tetrahydronaphthalen-1-ol<sup>10</sup> (**1h**) (50 mg, 0.179 mmol), Et<sub>3</sub>N (75  $\mu$ L, 0.539 mmol), and HOSA (60 mg, 0.539 mmol) were stirred at rt in HFIP (2 mL) for 12 h. Chromatographic purification of the crude product afforded **2h** (41 mg, 78%) as a green solid, mp 79–81 °C. TLC: R<sub>f</sub>  $\approx$  0.5 (40% EtOAc/hexanes). <sup>1</sup>H NMR (400 MHz, CDCl<sub>3</sub>)  $\delta$  6.99 (t, *J* = 8.1 Hz, 1H), 6.34 (dd, *J* = 11.1, 8.1 Hz, 2H), 6.13–5.98 (m, 1H), 5.40 (dq, *J* = 17.3, 1.6 Hz, 1H), 5.29–5.25 (m, 1H), 4.51 (dt, *J* = 5.0, 1.4 Hz, 2H), 3.67 (br s, 2H), 2.73 (t, *J* = 7.3 Hz, 2H), 2.36 (t, *J* = 7.2 Hz, 2H), 1.93 (p, *J* = 7.2 Hz, 2H); <sup>13</sup>C NMR (101 MHz, CDCl<sub>3</sub>)  $\delta$  157.37, 145.57, 133.65, 127.72, 120.36, 117.05, 112.78, 109.23, 102.33, 68.88, 24.29, 22.91, 16.93. HRMS (ESI, *m/z*): calcd. for [M+H]<sup>+</sup>, C<sub>13</sub>H<sub>16</sub>N<sub>2</sub>O<sup>+</sup> 217.1335; found, 217.1341.

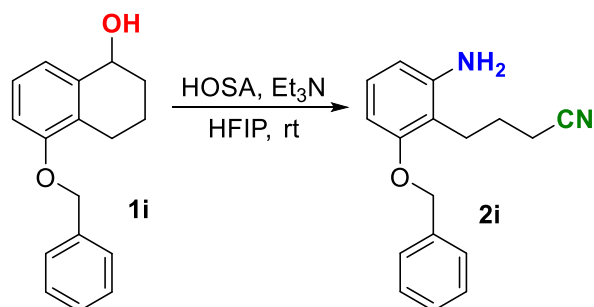

**4-(2-Amino-6-(benzyloxy)phenyl)butanenitrile (2i):** Following the general benzyl alcohol bis-functionalization procedure, 5-(benzyloxy)-1,2,3,4-tetrahydronaphthalen-1-ol<sup>11</sup> (**1i**) (50 mg, 0.196 mmol), Et<sub>3</sub>N (49  $\mu$ L, 0.433 mmol), and HOSA (60 mg, 0.433 mmol) were stirred at rt in HFIP (2 mL) for 12 h. Chromatographic purification of the crude product afforded **2i** (44 mg, 85%) as an oil. TLC: R<sub>f</sub>  $\approx$  0.5 (50% EtOAc/hexanes). <sup>1</sup>H NMR (400 MHz, CDCl<sub>3</sub>)  $\delta$  7.50–7.28 (m, 5H), 7.01 (t, *J* = 8.1 Hz, 1H), 6.40 (dd, *J* = 16.0, 8.1 Hz, 2H), 5.06 (s, 2H), 3.70 (br s, 2H), 2.76 (t, *J* = 7.3 Hz, 2H), 2.35 (t, *J* = 7.2 Hz, 2H), 1.93 (p, *J* = 7.2 Hz, 2H); <sup>13</sup>C NMR (101 MHz, CDCl<sub>3</sub>)  $\delta$  157.52, 145.62, 137.41, 128.66, 127.92, 127.78, 127.23, 120.32, 112.84, 109.36, 102.47, 70.10, 24.31, 23.05, 16.96. HRMS (ESI, *m/z*): calcd. for [M+H]<sup>+</sup>, C<sub>17</sub>H<sub>18</sub>N<sub>2</sub>O<sup>+</sup> 267.1492; found, 267.1506.

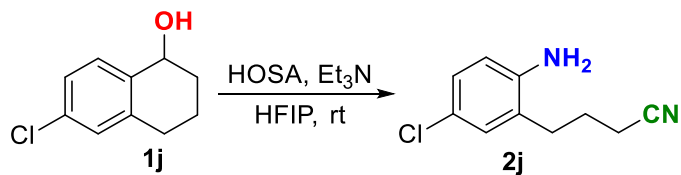

**4-(2-Amino-5-chlorophenyl)butanenitrile (2j):** Following the general benzyl alcohol bis-functionalization procedure, 6-chloro-1,2,3,4-tetrahydronaphthalen-1-ol (**1j**) (50 mg, 0.274



mmol), Et<sub>3</sub>N (84 μL, 0.604 mmol), and HOSA (68 mg, 0.604 mmol) were stirred at rt in HFIP (2 mL) for 14 h. Chromatographic purification of the crude product afforded **2j** (46 mg, 86%) as an oil. TLC: R<sub>f</sub> ≈ 0.4 (50% EtOAc/hexanes). <sup>1</sup>H NMR (400 MHz, CDCl<sub>3</sub>) δ 7.05–6.94 (m, 2H), 6.62 (d, *J* = 8.3 Hz, 1H), 3.63 (br s, 2H), 2.63 (t, *J* = 7.5 Hz, 2H), 2.39 (t, *J* = 6.9 Hz, 2H), 1.98 (p, *J* = 7.2 Hz, 2H); <sup>13</sup>C NMR (101 MHz, CDCl<sub>3</sub>) δ 142.92, 129.30, 127.62, 125.54, 123.46, 119.60, 117.14, 29.83, 24.23, 16.84. HRMS (ESI, *m/z*): calcd. for [M+H]<sup>+</sup>, C<sub>10</sub>H<sub>11</sub>ClN<sub>2</sub><sup>+</sup> 195.0684; found, 195.0685.

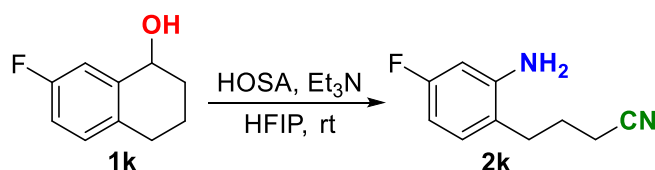

**4-(2-Amino-4-fluorophenyl)butanenitrile (2k)**: Following the general benzyl alcohol bis-functionalization procedure, 7-fluoro-1,2,3,4-tetrahydronaphthalen-1-ol (**1k**) (50 mg, 0.301 mmol), Et<sub>3</sub>N (92 μL, 0.662 mmol), and HOSA (74 mg, 0.662 mmol) were stirred at rt in HFIP (2 mL) for 16 h. Chromatographic purification of the crude product afforded **2k** (38 mg, 72%) as an oil. TLC: R<sub>f</sub> ≈ 0.5 (50% EtOAc/hexanes). <sup>1</sup>H NMR (400 MHz, CDCl<sub>3</sub>) δ 6.94 (dd, *J* = 8.2, 6.4 Hz, 1H), 6.50–6.19 (m, 2H), 3.74 (s, 2H), 2.62 (t, *J* = 7.5 Hz, 2H), 2.36 (t, *J* = 7.0 Hz, 2H), 1.96 (q, *J* = 7.2 Hz, 2H); <sup>13</sup>C NMR (101 MHz, CDCl<sub>3</sub>) δ 163.78, 161.37, 145.77, 145.67, 130.83, 130.74, 119.62, 119.32, 119.30, 105.35, 105.14, 102.68, 102.43, 29.27, 24.35, 16.61. HRMS (ESI, *m/z*): calcd. for [M+H]<sup>+</sup>, C<sub>10</sub>H<sub>11</sub>FN<sub>2</sub><sup>+</sup> 179.0979; found, 179.0994.

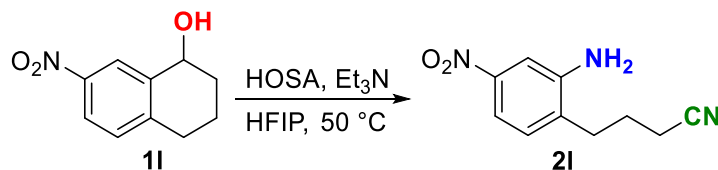

**4-(2-Amino-5-nitrophenyl)butanenitrile (2l)**: Following the general benzyl alcohol bis-functionalization procedure, 7-nitro-1,2,3,4-tetrahydronaphthalen-1-ol (**1l**) (50 mg, 0.259 mmol), Et<sub>3</sub>N (115 μL, 0.828 mmol), and HOSA (128 mg, 1.139 mmol) were stirred at 50 °C in HFIP (2 mL) for 24 h. Chromatographic purification of the crude product afforded **2l** (34 mg, 64%) as an oil. TLC: R<sub>f</sub> ≈ 0.4 (50% EtOAc/hexanes). <sup>1</sup>H NMR (400 MHz, CDCl<sub>3</sub>) δ 7.58 (dd, *J* = 8.3, 2.3 Hz, 1H), 7.53 (d, *J* = 2.3 Hz, 1H), 7.16 (d, *J* = 8.3 Hz, 1H), 3.94 (s, 2H), 2.79–2.67 (m, 2H), 2.43 (t, *J* = 6.9 Hz, 2H), 2.03 (dd, *J* = 8.0, 6.8 Hz, 2H); <sup>13</sup>C NMR (151 MHz, CDCl<sub>3</sub>) δ 147.90, 145.10, 130.70, 130.21, 119.33, 113.72, 110.06, 29.94, 23.81, 16.96. HRMS (ESI, *m/z*): calcd. for [M+H]<sup>+</sup>, C<sub>10</sub>H<sub>11</sub>N<sub>3</sub>O<sub>2</sub><sup>+</sup> 206.0924; found, 206.0927.

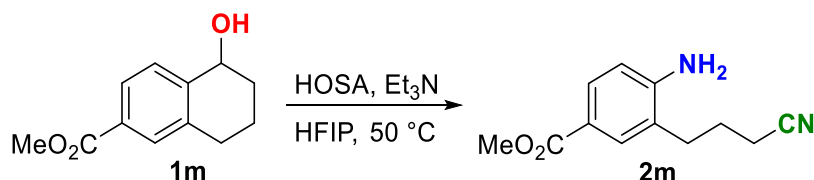

**Methyl 4-amino-3-(3-cyanopropyl)benzoate (2m):** Following the general benzyl alcohol bis-functionalization procedure, methyl 5-hydroxy-5,6,7,8-tetrahydronaphthalene-2-carboxylate (**1m**) (50 mg, 0.242 mmol), Et<sub>3</sub>N (74  $\mu$ L, 0.533 mmol), and HOSA (60 mg, 0.533 mmol) were stirred at 50 °C in HFIP (2 mL) for 14 h. Chromatographic purification of the crude product afforded **2m** (32 mg, 84%) as a brown solid, mp 97-99 °C. TLC: R<sub>f</sub>  $\approx$  0.5 (50% EtOAc/hexanes). <sup>1</sup>H NMR (400 MHz, CDCl<sub>3</sub>)  $\delta$  7.79–7.71 (m, 2H), 6.67 (d, *J* = 8.3 Hz, 1H), 4.15 (br s, 2H), 3.86 (s, 3H), 2.67 (t, *J* = 7.4 Hz, 2H), 2.41 (t, *J* = 7.0 Hz, 2H), 2.01 (p, *J* = 7.0 Hz, 2H); <sup>13</sup>C NMR (101 MHz, CDCl<sub>3</sub>)  $\delta$  167.24, 148.63, 131.52, 130.02, 122.82, 120.32, 119.65, 115.01, 51.83, 29.69, 24.32, 16.93. HRMS (ESI, *m/z*): calcd. for [M+H]<sup>+</sup>, C<sub>12</sub>H<sub>14</sub>N<sub>2</sub>O<sub>2</sub><sup>+</sup> 219.1128; found, 219.1133.

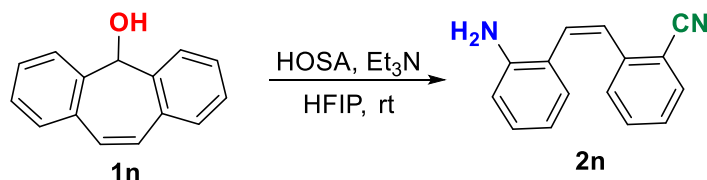

**(E)-2-(2-Aminostyryl)benzonitrile (2n):** Following the general benzyl alcohol bis-functionalization procedure, 5*H*-dibenzo[*a,d*][7]annulen-5-ol (**1n**) (50 mg, 0.240 mmol), Et<sub>3</sub>N (73  $\mu$ L, 0.528 mmol), and HOSA (59 mg, 0.528 mmol) were stirred at rt in HFIP (2 mL) for 14 h. Chromatographic purification of the crude product afforded **2n** (23 mg, 45%, *cis*-isomer determined by coupling constants) as a yellow solid, mp 90-92 °C. TLC: R<sub>f</sub>  $\approx$  0.5 (30% EtOAc/hexanes). <sup>1</sup>H NMR (400 MHz, CDCl<sub>3</sub>)  $\delta$  7.61 (dt, *J* = 7.7, 1.0 Hz, 1H), 7.36–7.30 (m, 2H), 7.29–7.22 (m, 1H), 7.11–7.05 (m, 1H), 6.92 (d, *J* = 11.9 Hz, 1H), 6.90–6.87 (m, 1H), 6.79 (d, *J* = 11.9 Hz, 1H), 6.70 (dd, *J* = 8.1, 1.1 Hz, 1H), 6.60 (td, *J* = 7.5, 1.1 Hz, 1H), 3.75 (br s, 2H); <sup>13</sup>C NMR (101 MHz, CDCl<sub>3</sub>)  $\delta$  144.19, 140.65, 132.91, 132.31, 131.09, 129.64, 129.29, 129.22, 127.61, 127.46, 121.95, 118.55, 118.11, 115.90, 112.19. HRMS (ESI, *m/z*): calcd. for [M+H]<sup>+</sup>, C<sub>15</sub>H<sub>12</sub>N<sub>2</sub><sup>+</sup> 221.1073; found, 221.1078.

Note: Isomeritism of product observed in presence of light after 24 h.

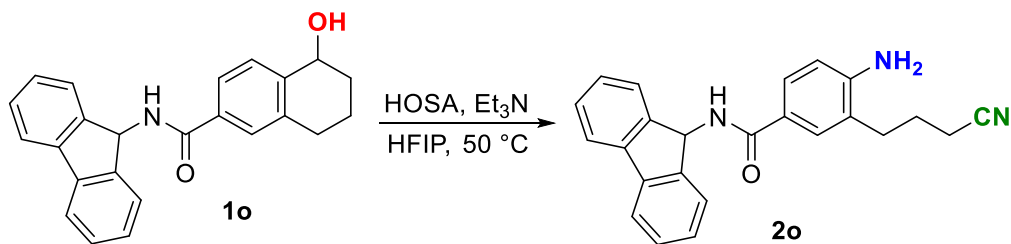

**4-Amino-3-(3-cyanopropyl)-*N*-(9*H*-fluoren-9-yl)benzamide (2o):** Following the general benzyl alcohol bis-functionalization procedure, *N*-(9*H*-fluoren-9-yl)-5-hydroxy-5,6,7,8-tetrahydronaphthalene-2-carboxamide (**1o**) (50 mg, 0.140 mmol), Et<sub>3</sub>N (43  $\mu$ L, 0.309 mmol), and HOSA (35 mg, 0.309 mmol) were stirred at 50 °C in HFIP (2 mL) for 10 h. Chromatographic purification of the crude product afforded **2o** (36 mg, 70%) as a viscous oil. TLC: R<sub>f</sub>  $\approx$  0.5 (50% EtOAc/hexanes). <sup>1</sup>H NMR (400 MHz, CD<sub>3</sub>OD)  $\delta$  7.78 (d, *J* = 7.7 Hz, 2H), 7.63–7.51 (m, 4H), 7.45–7.35 (m, 2H), 7.31 (td, *J* = 7.5, 1.2 Hz, 2H), 6.72 (d, *J* = 8.3 Hz, 1H), 6.33 (s, 1H), 2.65 (t, *J* = 8.1 Hz, 2H), 2.46 (t, *J* = 7.2 Hz, 2H), 1.94 (p, *J* = 7.4 Hz, 2H); <sup>13</sup>C NMR (101 MHz, CD<sub>3</sub>OD)  $\delta$  171.22, 150.43, 146.18, 142.04, 130.58, 129.53, 128.69, 128.53, 125.94, 124.58, 123.65, 121.16,

120.98, 115.79, 56.30, 31.01, 25.63, 16.98. HRMS (ESI,  $m/z$ ): calcd. for  $[M+H]^+$ ,  $C_{24}H_{21}N_3O_2^+$  368.1757; found, 368.1749.

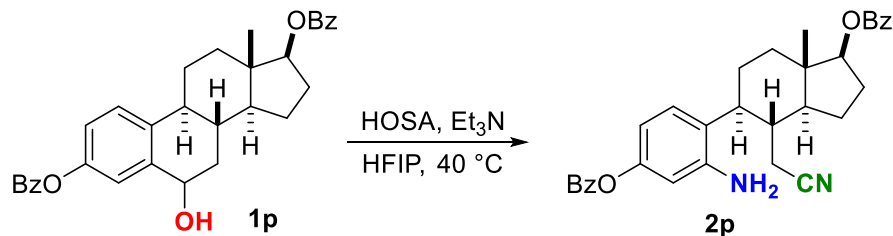

**3-Amino-4-((1*S*,3*aS*,4*R*,5*S*,7*aS*)-1-(benzoyloxy)-4-(cyanomethyl)-7*a*-methyloctahydro-1*H*-inden-5-yl)phenyl benzoate (**2p**):** Following the general benzyl alcohol bis-functionalization procedure, (8*R*,9*S*,13*S*,14*S*,17*S*)-6-hydroxy-13-methyl-7,8,9,11,12,13,14,15,16,17-decahydro-6*H*-cyclopenta[*a*]phenanthrene-3,17-diyl dibenzoate (**1p**) (22 mg, 0.044 mmol),  $Et_3N$  (13  $\mu$ L, 0.097 mmol), and HOSA (11 mg, 0.097 mmol) were stirred at 40 °C in HFIP (1 mL) for 21 h. Chromatographic purification of the crude product afforded **2p** (17 mg, 81%) as a viscous oil. TLC:  $R_f \approx 0.5$  (30% EtOAc/hexanes).  $^1H$  NMR (400 MHz,  $CDCl_3$ )  $\delta$  8.18 (d,  $J = 7.6$  Hz, 2H), 8.05 (d,  $J = 7.5$  Hz, 2H), 7.66–7.41 (m, 6H), 6.77–6.49 (m, 2H), 4.99 (t,  $J = 7.51$ , 1H), 3.97 (br s, 2H), 2.66–2.53 (m, 1H), 2.51–2.23 (m, 3H), 2.17–2.06 (m, 1H), 2.00–1.83 (m, 3H), 1.82–1.67 (m, 3H), 1.61–1.46 (m, 3H), 1.13 (s, 3H);  $^{13}C$  NMR (151 MHz,  $CDCl_3$ )  $\delta$  166.49, 165.31, 150.16, 145.85, 133.72, 133.08, 130.58, 130.28, 129.72, 129.68, 128.70, 128.52, 127.32, 125.07, 118.69, 112.48, 109.64, 82.76, 47.92, 43.71, 40.97, 38.41, 36.90, 29.95, 27.63, 23.93, 19.29, 12.58. HRMS (ESI,  $m/z$ ): calcd. for  $[M+H]^+$ ,  $C_{32}H_{32}N_2O_4^+$  509.2435; found 509.2431.

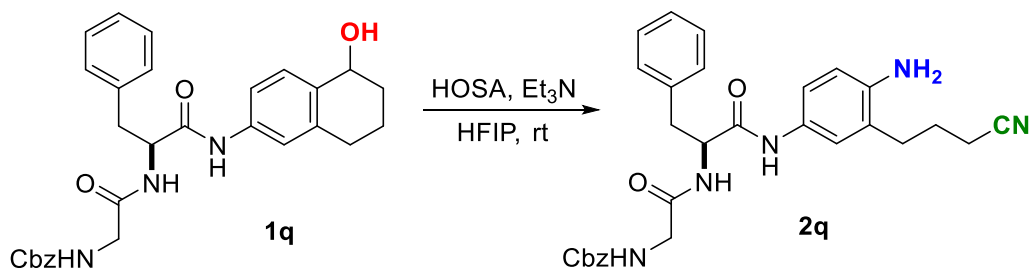

**Benzyl (S)-(2-((1-((4-amino-3-(3-cyanopropyl)phenyl)amino)-1-oxo-3-phenylpropan-2-yl)amino)-2-oxoethyl)carbamate (**2q**):** Following the general benzyl alcohol bis-functionalization procedure, benzyl (2-(2*S*)-1-((5-hydroxy-5,6,7,8-tetrahydronaphthalen-2-yl)amino)-1-oxo-3-phenylpropan-2-yl)amino)-2-oxoethyl)carbamate (**1q**) (30 mg, 0.0598 mmol),  $Et_3N$  (18  $\mu$ L, 0.1317 mmol), and HOSA (14 mg, 0.1317 mmol) were stirred at rt in HFIP (1.5 mL) for 10 h. Chromatographic purification of the crude product afforded **2q** (23 mg, 76%) as a solid, mp 123–125 °C. TLC:  $R_f \approx 0.5$  (10% MeOH/ $CH_2Cl_2$ ).  $^1H$  NMR (400 MHz,  $CDCl_3$ )  $\delta$  7.96–7.88 (m, 1H), 7.43–6.86 (m, 12H), 6.56 (dd,  $J = 8.3, 2.0$  Hz, 1H), 5.59–5.46 (m, 1H), 5.08 (s, 2H), 4.79 (q,  $J = 7.2$  Hz, 1H), 4.02–3.42 (m, 4H), 3.10 (t,  $J = 7.3$  Hz, 2H), 2.55 (td,  $J = 7.5, 3.2$  Hz, 2H), 2.30 (t,  $J = 7.0$  Hz, 2H), 1.91 (q,  $J = 7.3$  Hz, 2H);  $^{13}C$  NMR (151 MHz,  $CDCl_3$ )  $\delta$  169.43, 168.78, 156.89, 141.39, 136.51, 136.09, 129.45, 129.03, 128.87, 128.83, 128.72, 128.46, 128.28, 127.25, 127.21, 124.41, 122.40, 122.37, 120.58, 120.54, 119.83, 116.28, 67.46, 55.23, 44.71, 38.51, 29.94, 24.28, 16.75. HRMS (ESI,  $m/z$ ): calcd. for  $[M+H]^+$ ,  $C_{29}H_{31}N_5O_4^+$  514.2449; found 514.2451.

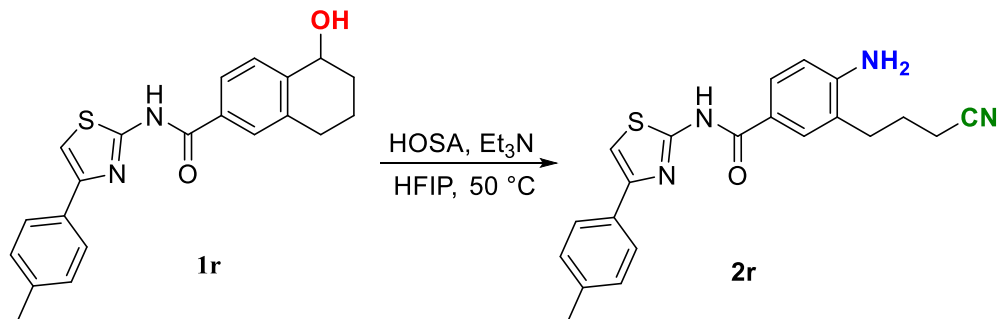

**4-Amino-3-(3-cyanopropyl)-N-(4-(*p*-tolyl)thiazol-2-yl)benzamide (2r):** Following the general benzyl alcohol bis-functionalization procedure, 5-hydroxy-*N*-(4-(*p*-tolyl)thiazol-2-yl)-5,6,7,8-tetrahydronaphthalene-2-carboxamide (**1r**) (50 mg, 0.142 mmol), Et<sub>3</sub>N (43  $\mu$ L, 0.314 mmol), and HOSA (35 mg, 0.314 mmol) were stirred at 50 °C in HFIP (2 mL) for 16 h. Chromatographic purification of the crude product afforded 4-amino-3-(3-cyanopropyl)-*N*-(4-(*p*-tolyl)thiazol-2-yl)benzamide **2r** (38 mg, 72%) as an oil. TLC:  $R_f \approx 0.5$  (70% EtOAc/hexanes). <sup>1</sup>H NMR (400 MHz, CD<sub>3</sub>OD + CDCl<sub>3</sub> 3:1)  $\delta$  7.80–7.65 (m, 4H), 7.24–7.15 (m, 3H), 6.76 (d,  $J = 9.0$  Hz, 1H), 2.73–2.66 (m, 2H), 2.49 (t,  $J = 7.2$  Hz, 2H), 2.35 (s, 3H), 2.06–1.94 (m, 2H); <sup>13</sup>C NMR (151 MHz, CD<sub>3</sub>OD + CDCl<sub>3</sub> 3:1)  $\delta$  167.09, 151.69, 151.01, 138.52, 132.99, 130.79, 130.08, 128.86, 126.78, 124.00, 120.88, 120.71, 115.38, 107.58, 30.77, 25.18, 21.31, 16.96. HRMS (ESI,  $m/z$ ): calcd. for [M+H]<sup>+</sup>, C<sub>21</sub>H<sub>20</sub>N<sub>4</sub>OS<sup>+</sup> 377.1431; found, 377.1435.

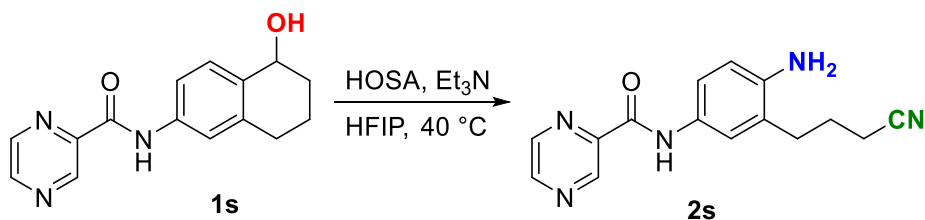

***N*-(4-Amino-3-(3-cyanopropyl)phenyl)pyrazine-2-carboxamide (2s):** Following the general benzyl alcohol bis-functionalization procedure, *N*-(5-hydroxy-5,6,7,8-tetrahydronaphthalen-2-yl)pyrazine-2-carboxamide (**1s**) (50 mg, 0.185 mmol), Et<sub>3</sub>N (56  $\mu$ L, 0.408 mmol), and HOSA (46 mg, 0.408 mmol) were stirred at 40 °C in HFIP (2 mL) for 3 h. Chromatographic purification of the crude product afforded **2s** (45 mg, 88%) as a yellow solid, mp 137–139 °C. TLC:  $R_f \approx 0.5$  (40% EtOAc/hexanes). <sup>1</sup>H NMR (400 MHz, CDCl<sub>3</sub>)  $\delta$  9.55–9.42 (m, 2H), 8.78 (d,  $J = 2.5$  Hz, 1H), 8.60–8.51 (m, 1H), 7.49 (d,  $J = 2.5$  Hz, 1H), 7.42 (dd,  $J = 8.5, 2.5$  Hz, 1H), 6.71 (d,  $J = 8.5$  Hz, 1H), 3.65 (br s, 2H), 2.69 (t,  $J = 7.5$  Hz, 2H), 2.41 (t,  $J = 7.0$  Hz, 2H), 2.03 (p,  $J = 7.2$  Hz, 2H); <sup>13</sup>C NMR (101 MHz, CDCl<sub>3</sub>)  $\delta$  160.36, 147.43, 144.72, 144.61, 142.45, 141.64, 129.11, 124.58, 121.81, 120.00, 119.74, 116.47, 30.07, 24.39, 16.82. HRMS (ESI,  $m/z$ ): calcd. for [M+H]<sup>+</sup>, C<sub>15</sub>H<sub>15</sub>N<sub>5</sub>O<sup>+</sup> 282.1349; found, 282.1355.

## Table 2 Experimental Procedures and Analytical Data

**General procedure for benzyl alcohol amination:** Acyclic benzylic alcohol (1 equiv) was added to a stirring equimolar solution of HOSA and Et<sub>3</sub>N (1.5 equiv) at 0 °C in HFIP (0.15 M) under an argon atmosphere. After 15 min, the reaction mixture was warmed to rt–50 °C. After complete

consumption (monitored via TLC), the rt reaction mixture was diluted with CH<sub>2</sub>Cl<sub>2</sub> (equal vol), washed with saturated aq. Na<sub>2</sub>CO<sub>3</sub>, brine, dried over anhydrous Na<sub>2</sub>SO<sub>4</sub>, and concentrated *in vacuo*. The crude residue was purified chromatographically using MeOH/CH<sub>2</sub>Cl<sub>2</sub> or EtOAc/hexanes as eluent to furnish the anilines. Variations in reaction conditions are noted in the Table 2 legends for select substrates.

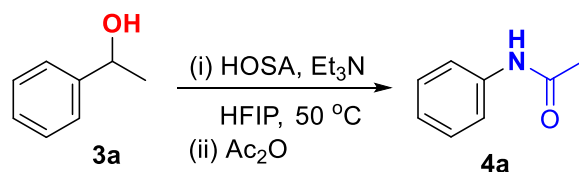

(i) **N-Phenylacetamide (4a)**: Following the general benzyl alcohol amination procedure, 1-phenylethanol (**3a**) (50 mg, 0.409 mmol), Et<sub>3</sub>N (85  $\mu$ L, 0.614 mmol), and HOSA (69 mg, 0.614 mmol) were stirred at 50  $^\circ$ C in HFIP (2 mL) for 6 h. After extractive isolation using CH<sub>2</sub>Cl<sub>2</sub> (3  $\times$  10 mL) and concentration *in vacuo*, the residue (56 mg) was acetylated (*vide infra*) to facilitate isolation and identification.

Acetic anhydride (0.28 mL, 3.010 mmol) was added to a stirring, rt solution of the above residue (56 mg, 0.602 mmol) in dry CH<sub>2</sub>Cl<sub>2</sub> (5 mL). After 15 h, all volatiles were removed *in vacuo* and the crude residue was purified chromatographically using 70-80% EtOAc/hexanes as eluent to furnish **4a** (39 mg, 71%) as a colorless solid whose spectral data were in agreement with literature values.<sup>12</sup> mp 113-115  $^\circ$ C (lit.<sup>12</sup> 113-115  $^\circ$ C), TLC: R<sub>f</sub>  $\approx$  0.4 (50% EtOAc/hexanes). <sup>1</sup>H NMR (400 MHz, CDCl<sub>3</sub>)  $\delta$  7.90 (br s, 1H), 7.50 (d, *J* = 7.9 Hz, 2H), 7.29 (t, *J* = 7.8 Hz, 2H), 7.09 (t, *J* = 7.4 Hz, 1H), 2.15 (s, 3H). <sup>13</sup>C NMR (101 MHz, CDCl<sub>3</sub>)  $\delta$  168.98, 138.10, 129.00, 124.37, 120.19, 24.53.

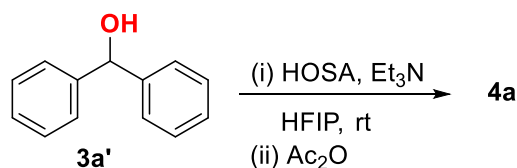

(ii) **N-Phenylacetamide (4a)**: Following the general benzyl alcohol amination procedure, diphenylmethanol (**3a'**) (50 mg, 0.271 mmol), Et<sub>3</sub>N (56  $\mu$ L, 0.407 mmol), and HOSA (46 mg, 0.407 mmol) were stirred at rt in HFIP (2 mL) for 4 h. After extractive isolation using CH<sub>2</sub>Cl<sub>2</sub> (3  $\times$  10 mL) and concentration *in vacuo*, the residue (58 mg) was acetylated (*vide infra*) to facilitate isolation and identification.

Acetic anhydride (0.29 mL, 3.115 mmol) was added to stirring solution of the above crude (58 mg, 0.623 mmol) in dry CH<sub>2</sub>Cl<sub>2</sub> (5 mL). After 15 h, all volatiles were removed *in vacuo* and the crude residue was purified chromatographically using 70-80% EtOAc/hexane to furnish **4a** (27 mg, 76%) as a solid identical to an authentic sample (*vide supra*) and benzaldehyde (10 mg, 36%), benzonitrile (5 mg, 18%).

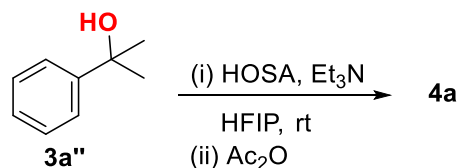

(iii) **N-Phenylacetamide (4a)**: Following the general benzyl alcohol amination procedure, 2-phenylpropan-2-ol (**3a''**) (50 mg, 0.367 mmol), Et<sub>3</sub>N (76 μL, 0.551 mmol), and HOSA (62 mg, 0.551 mmol) were stirred at rt in HFIP (2 mL) for 4 h. After isolation, the residue (55 mg) was acetylated (*vide infra*) to facilitate isolation and identification.

Acetic anhydride (0.27 mL, 2.956 mmol) was added to stirring solution of the above crude residue (55 mg, 0.591 mmol) in dry CH<sub>2</sub>Cl<sub>2</sub> (5 mL). After 15 h, all volatiles were removed *in vacuo* and the crude residue was purified chromatographically using 70-80% EtOAc/hexane to furnish **4a** (33 mg, 68%) as a solid identical to an authentic sample (*vide supra*).

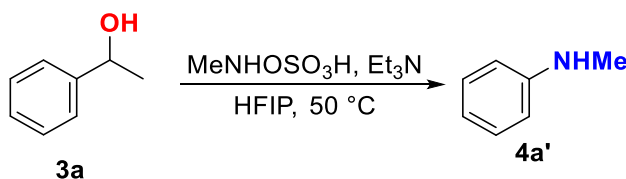

**N-Methylaniline (4a')**: In a modification of the the general benzyl alcohol amination procedure, 1-phenylethanol (**3a**) (50 mg, 0.409 mmol), Et<sub>3</sub>N (85 μL, 0.614 mmol), and MeNHOSO<sub>3</sub>H<sup>13</sup> (136 mg, 1.227 mmol) were stirred at 50 °C in HFIP (2 mL) for 1 h. Chromatographic purification of the crude product afforded **4a'** (31 mg, 72%) as a yellow oil whose spectral data were in agreement with literature values.<sup>14</sup> TLC: R<sub>f</sub> ≈ 0.4 (20% EtOAc/hexanes). <sup>1</sup>H NMR (400 MHz, CDCl<sub>3</sub>) δ 7.24–7.15 (m, 2H), 6.73 (tt, *J* = 7.4, 1.1 Hz, 1H), 6.66–6.61 (m, 2H), 3.71 (br s, 1H), 2.85 (s, 3H). <sup>13</sup>C NMR (101 MHz, CDCl<sub>3</sub>) δ 149.44, 129.31, 117.34, 112.52, 30.83.

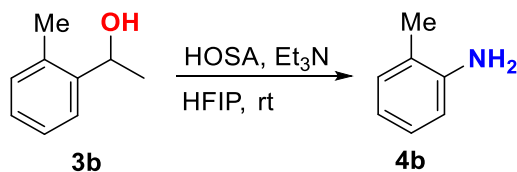

**o-Toluidine (4b)**: Following the general benzyl alcohol amination procedure, 1-(*o*-tolyl)ethanol (**3b**) (50 mg, 0.367 mmol), Et<sub>3</sub>N (76 μL, 0.551 mmol), and HOSA (44 mg, 0.551 mmol) were stirred at rt in HFIP (2 mL) for 5 h. Chromatographic purification of the crude product afforded **4b** (34 mg, 88%) as a yellow oil whose spectral data were in agreement with literature values.<sup>15</sup> TLC: R<sub>f</sub> ≈ 0.5 (20% EtOAc/hexanes). <sup>1</sup>H NMR (400 MHz, CDCl<sub>3</sub>) δ 7.10–7.03 (m, 2H), 6.78–6.67 (m, 2H), 3.57 (br s, 2H), 2.20 (s, 3H); <sup>13</sup>C NMR (101 MHz, CDCl<sub>3</sub>) δ 144.59, 130.55, 127.06, 122.46, 118.77, 115.06, 17.45.

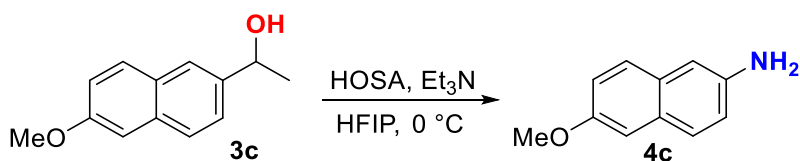

**6-Methoxynaphthalen-2-amine (4c)**: Following the general benzyl alcohol amination procedure, 1-(6-methoxynaphthalen-2-yl)ethanol (**3c**) (50 mg, 0.247 mmol), Et<sub>3</sub>N (51 μL, 0.371 mmol), and HOSA (41 mg, 0.371 mmol) were stirred at 0 °C in HFIP (2 mL) for 2 h. Chromatographic purification of the crude product afforded **4c** (30 mg, 73%) as a white solid whose spectral data

were in agreement with literature values.<sup>16</sup> TLC:  $R_f \approx 0.5$  (40% EtOAc/hexanes). <sup>1</sup>H NMR (400 MHz, CDCl<sub>3</sub>)  $\delta$  7.55 (dd,  $J = 23.2, 8.7$  Hz, 2H), 7.14–6.86 (m, 4H), 3.89 (s, 3H), 3.73 (br s, 2H); <sup>13</sup>C NMR (101 MHz, CDCl<sub>3</sub>)  $\delta$  155.42, 142.35, 130.23, 128.70, 127.94, 127.35, 119.00, 118.76, 109.26, 106.12, 55.31.

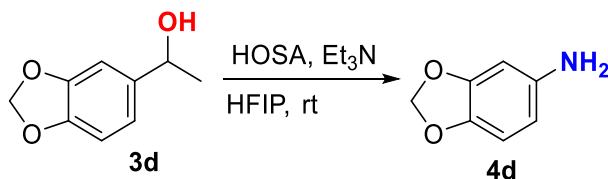

**Benzo[d][1,3]dioxol-5-amine (4d):** Following the general benzyl alcohol amination procedure, 1-(benzo[d][1,3]dioxol-5-yl)ethan-1-ol (**3d**) (50 mg, 0.301 mmol), Et<sub>3</sub>N (62  $\mu$ L, 0.451 mmol), and HOSA (51 mg, 0.451 mmol) were stirred at rt in HFIP (2 mL) for 3 h. Chromatographic purification of the crude product afforded **4d** (27 mg, 66%) as a yellow solid whose spectral data were in agreement with literature values.<sup>17</sup> TLC:  $R_f \approx 0.5$  (20% EtOAc/hexanes). <sup>1</sup>H NMR (400 MHz, CDCl<sub>3</sub>)  $\delta$  6.62 (dd,  $J = 8.2, 1.7$  Hz, 1H), 6.29 (t,  $J = 2.0$  Hz, 1H), 6.13 (dt,  $J = 8.3, 2.0$  Hz, 1H), 5.86 (s, 2H), 3.37 (br s, 2H); <sup>13</sup>C NMR (101 MHz, CDCl<sub>3</sub>)  $\delta$  148.34, 141.53, 140.49, 108.70, 106.99, 100.78, 98.19.

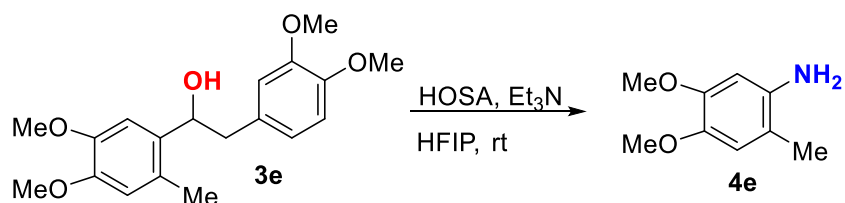

**4,5-Dimethoxy-2-methylaniline (4e):** Following the general benzyl alcohol amination procedure, 1-(4,5-dimethoxy-2-methylphenyl)-2-(3,4-dimethoxyphenyl)ethan-1-ol (**3e**) (50 mg, 0.157 mmol), Et<sub>3</sub>N (32  $\mu$ L, 0.235 mmol), and HOSA (26 mg, 0.235 mmol) were stirred at rt in HFIP (2 mL) for 12 h. Chromatographic purification of the crude product afforded **4e** (21 mg, 80%) as a solid whose spectral data were in agreement with literature values. mp 106–108 °C (lit.<sup>18</sup> 106–107 °C), TLC:  $R_f \approx 0.5$  (40% EtOAc/hexanes). <sup>1</sup>H NMR (400 MHz, CD<sub>3</sub>OD)  $\delta$  6.62 (s, 1H), 6.30 (s, 1H), 3.81 (s, 3H), 3.80 (br s, 3H), 2.11 (s, 3H); <sup>13</sup>C NMR (101 MHz, CDCl<sub>3</sub>)  $\delta$  148.24, 142.02, 138.20, 115.37, 113.82, 100.97, 56.92, 56.12, 16.96.

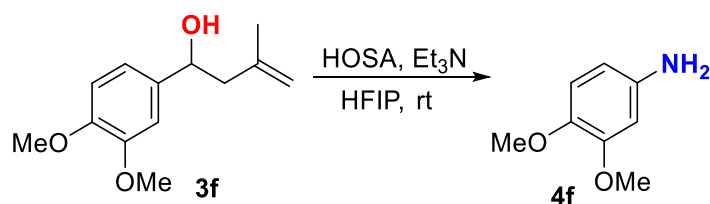

**3,4-Dimethoxyaniline (4f):** Following the general benzyl alcohol amination procedure, 1-(3,4-dimethoxyphenyl)-3-methylbut-3-en-1-ol (**3f**) (50 mg, 0.225 mmol), Et<sub>3</sub>N (47  $\mu$ L, 0.337 mmol), and HOSA (38 mg, 0.337 mmol) were stirred at rt in HFIP (2 mL) for 16 h. Chromatographic

purification of the crude product afforded **4f** (27 mg, 81%) as an oil whose spectral data were in agreement with literature values.<sup>20</sup> TLC:  $R_f \approx 0.5$  (40% EtOAc/hexanes). <sup>1</sup>H NMR (400 MHz, CDCl<sub>3</sub>)  $\delta$  6.70 (d,  $J = 8.4$  Hz, 1H), 6.32 (d,  $J = 2.5$  Hz, 1H), 6.25 (dd,  $J = 8.4, 2.6$  Hz, 1H), 3.83 (s, 3H), 3.80 (s, 3H), 3.20 (br s, 2H); <sup>13</sup>C NMR (151 MHz, CDCl<sub>3</sub>)  $\delta$  149.95, 142.32, 140.66, 113.10, 106.50, 100.82, 56.71, 55.85.

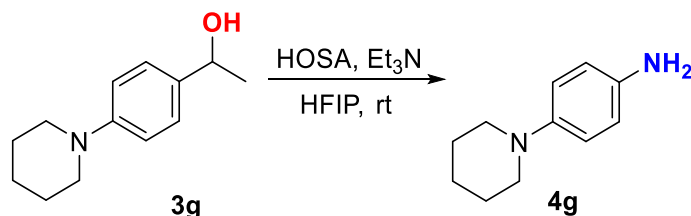

**4-(Piperidin-1-yl)aniline (4h):** Following the general benzyl alcohol amination procedure, 1-(4-(piperidin-1-yl)phenyl)ethan-1-ol (**3g**) (50 mg, 0.243 mmol), Et<sub>3</sub>N (51  $\mu$ L, 0.365 mmol), and HOSA (41 mg, 0.365 mmol) were stirred at rt in HFIP (2 mL) for 14 h. Chromatographic purification of the crude product afforded **4g** (27 mg, 65%) a brown solid mp 38–40 °C (lit.<sup>21</sup> 41 °C), whose spectral data were in agreement with literature values.<sup>21</sup> TLC:  $R_f \approx 0.5$  (40% EtOAc/hexanes). <sup>1</sup>H NMR (400 MHz, CDCl<sub>3</sub>)  $\delta$  6.83 (d,  $J = 8.8$  Hz, 2H), 6.64 (d,  $J = 8.7$  Hz, 2H), 3.41 (br s, 2H), 3.00–2.95 (m, 4H), 1.71 (p,  $J = 5.7$  Hz, 4H), 1.58–1.47 (m, 2H); <sup>13</sup>C NMR (101 MHz, CDCl<sub>3</sub>)  $\delta$  145.93, 139.94, 119.28, 116.29, 52.74, 26.33, 24.33.

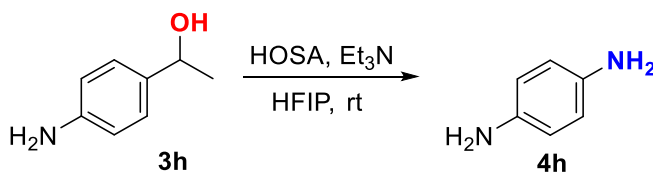

**Benzene-1,4-diamine (4h):** Following the general benzyl alcohol amination procedure, 1-(4-aminophenyl)ethan-1-ol (**3h**) (50 mg, 0.364 mmol), Et<sub>3</sub>N (76  $\mu$ L, 0.547 mmol), and HOSA (61 mg, 0.547 mmol) were stirred at rt in HFIP (2 mL) for 14 h. Chromatographic purification of the crude product afforded **4h** (30 mg, 78%) as a brown solid whose spectral data were in agreement with literature values.<sup>22</sup> TLC:  $R_f \approx 0.5$  (10% MeOH/CH<sub>2</sub>Cl<sub>2</sub>). <sup>1</sup>H NMR (400 MHz, CDCl<sub>3</sub>)  $\delta$  6.57 (s, 4H), 3.21 (br s, 4H); <sup>13</sup>C NMR (101 MHz, CDCl<sub>3</sub>)  $\delta$  138.70, 116.85.

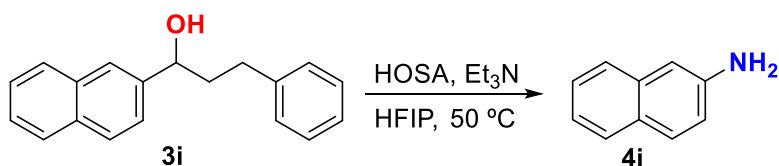

**2-Naphthylamine (4i):** Following the general benzyl alcohol amination procedure, 1-(naphthalen-2-yl)-3-phenylpropan-1-ol<sup>23</sup> (50 mg, 0.190 mmol), Et<sub>3</sub>N (40  $\mu$ L, 0.286 mmol), and HOSA (32 mg, 0.286 mmol) were stirred at 50 °C in HFIP (2 mL) for 10 h. Chromatographic purification of the crude product afforded **4i** (19 mg, 70%) as an off white solid whose spectral data were in agreement with literature values.<sup>24</sup> TLC:  $R_f \approx 0.4$  (20% EtOAc/hexanes). <sup>1</sup>H NMR (400 MHz, CDCl<sub>3</sub>)  $\delta$  7.69 (dd,  $J = 13.9, 8.4$  Hz, 2H), 7.60 (d,  $J = 8.3$  Hz, 1H), 7.38 (ddd,  $J = 8.2, 6.9, 1.3$  Hz, 1H), 7.26–7.20



(m, 1H), 6.99 (d,  $J = 2.3$  Hz, 1H), 6.95 (dd,  $J = 8.6, 2.3$  Hz, 1H), 3.82 (br s, 2H);  $^{13}\text{C}$  NMR (101 MHz,  $\text{CDCl}_3$ )  $\delta$  144.22, 135.04, 129.34, 128.10, 127.84, 126.47, 125.92, 122.60, 118.35, 108.72.

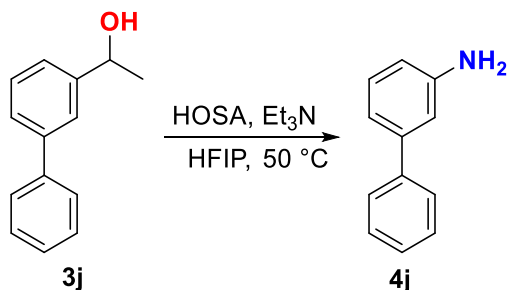

**[1,1'-Biphenyl]-3-amine (4J):** Following the general benzyl alcohol amination procedure, 1-(1,1'-biphenyl)-3-yl)ethan-1-ol (50 mg, 0.252 mmol),  $\text{Et}_3\text{N}$  (52  $\mu\text{L}$ , 0.378 mmol), and HOSA (42 mg, 0.378 mmol) were stirred at 50  $^\circ\text{C}$  in HFIP (2 mL) for 5 h. Chromatographic purification of the crude product afforded **4J** (31 mg, 73%) as a yellow solid whose spectral data were in agreement with literature values.<sup>25</sup> TLC:  $R_f \approx 0.5$  (30% EtOAc/hexanes).  $^1\text{H}$  NMR (400 MHz,  $\text{CDCl}_3$ )  $\delta$  7.61–7.53 (m, 2H), 7.47–7.39 (m, 2H), 7.38–7.31 (m, 1H), 7.28–7.20 (m, 1H), 7.01 (dt,  $J = 7.7, 1.3$  Hz, 1H), 6.92 (t,  $J = 2.0$  Hz, 1H), 6.70 (ddd,  $J = 8.0, 2.3, 1.0$  Hz, 1H), 3.53 (br s, 2H);  $^{13}\text{C}$  NMR (101 MHz,  $\text{CDCl}_3$ )  $\delta$  146.69, 142.59, 141.50, 129.81, 128.76, 127.35, 127.24, 117.92, 114.30, 114.12.

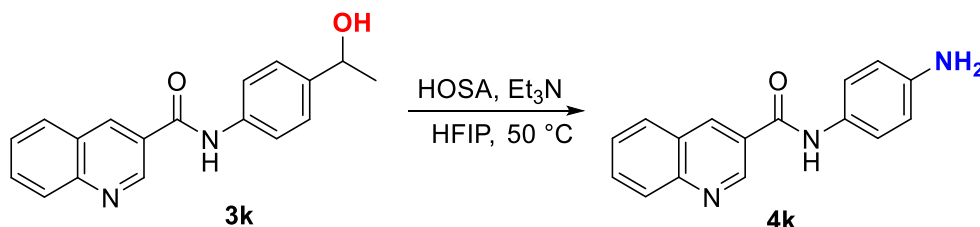

***N*-(4-Aminophenyl)quinoline-3-carboxamide (4k):** Following the general benzyl alcohol amination procedure, *N*-(4-(1-hydroxyethyl)phenyl)quinoline-3-carboxamide (50 mg, 0.171 mmol),  $\text{Et}_3\text{N}$  (35  $\mu\text{L}$ , 0.256 mmol), and HOSA (28 mg, 0.256 mmol) were stirred at 50  $^\circ\text{C}$  in HFIP (2 mL) for 12 h. Chromatographic purification of the crude product afforded **4k** (37 mg, 83%) as a yellow solid (decomposes at 179  $^\circ\text{C}$ ) whose spectral data were in agreement with literature values.<sup>26</sup> TLC:  $R_f \approx 0.4$  (70% EtOAc/hexanes).  $^1\text{H}$  NMR (400 MHz,  $\text{CD}_3\text{OD}$ )  $\delta$  9.31 (d,  $J = 2.2$  Hz, 1H), 8.89 (d,  $J = 2.2$  Hz, 1H), 8.14–8.05 (m, 2H), 7.89 (ddd,  $J = 8.5, 7.0, 1.4$  Hz, 1H), 7.72 (ddd,  $J = 8.0, 6.9, 1.2$  Hz, 1H), 7.45 (d,  $J = 8.7$  Hz, 2H), 6.77 (d,  $J = 8.7$  Hz, 2H), 3.34 (br s, 1H).  $^{13}\text{C}$  NMR (151 MHz, 2 : 1  $\text{CD}_3\text{OD} : \text{CDCl}_3$ )  $\delta$  165.48, 149.39, 149.07, 144.54, 137.39, 132.43, 130.27, 129.79, 128.79, 128.73, 128.50, 127.94, 123.61, 116.63.

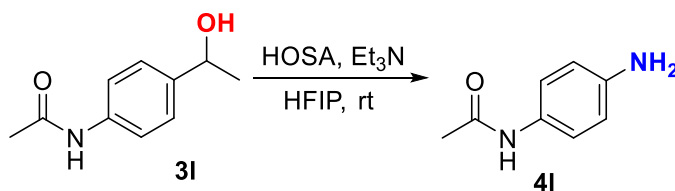

***N*-(4-Aminophenyl)acetamide (4l)**: Following the general benzyl alcohol amination procedure, *N*-(4-(1-hydroxyethyl)phenyl)acetamide (50 mg, 0.279 mmol), Et<sub>3</sub>N (58 μL, 0.418 mmol), and HOSA (47 mg, 0.418 mmol) were stirred at rt in HFIP (2 mL) for 14 h. Chromatographic purification of the crude product afforded **4l** (33 mg, 81%) as a solid mp 160-163 °C (lit.<sup>27</sup> 165-167 °C), whose spectral data were in agreement with literature values.<sup>27</sup> TLC: R<sub>f</sub> ≈ 0.4 (70% EtOAc/hexanes). <sup>1</sup>H NMR (400 MHz, CD<sub>3</sub>OD) δ 7.22 (d, *J* = 8.7 Hz, 2H), 6.68 (d, *J* = 8.7 Hz, 2H), 2.06 (br s, 2H); <sup>13</sup>C NMR (101 MHz, CD<sub>3</sub>OD) δ 171.26, 145.55, 130.70, 123.18, 116.67, 23.46.

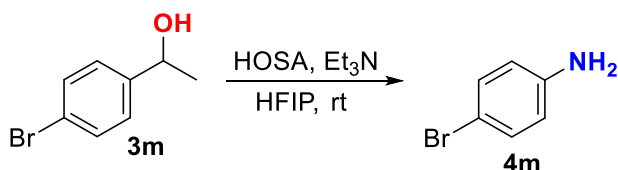

**4-Bromoaniline (4m)**: Following the general benzyl alcohol amination procedure, 1-(4-bromophenyl)ethan-1-ol (50 mg, 0.251 mmol), Et<sub>3</sub>N (105 μL, 0.753 mmol), and HOSA (85 mg, 0.753 mmol) were stirred at rt in HFIP (2 mL) for 14 h. Chromatographic purification of the crude product afforded **4m** (30 mg, 72%) as a brown solid mp 59-61 °C (lit.<sup>28</sup> 60-61 °C), whose spectral data were in agreement with literature values.<sup>28</sup> TLC: R<sub>f</sub> ≈ 0.5 (40% EtOAc/hexanes). <sup>1</sup>H NMR (400 MHz, CDCl<sub>3</sub>) δ 7.26 (d, *J* = 8.6 Hz, 2H), 6.58 (d, *J* = 8.7 Hz, 2H), 3.67 (br s, 2H); <sup>13</sup>C NMR (101 MHz, CDCl<sub>3</sub>) δ 145.53, 132.10, 116.81, 110.27.

Note: 1.5 equiv of each HOSA and TEA at 50 °C for 14 h gave **4m** in 33% (14 mg) yield and unreacted starting material 51% (25 mg).

Screening with acid additives:

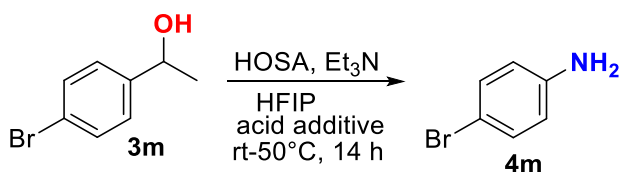

| Starting material<br><b>3m</b> | HOSA(equiv) | TEA(equiv) | Additive (equiv)          | Yield of <b>4m</b> | Yield of <b>3m</b> |
|--------------------------------|-------------|------------|---------------------------|--------------------|--------------------|
|                                | 1.5         | 1.5        | -                         | 33%                | 51%                |
|                                | 1.5         | 1.5        | Trifluoroacetic acid (1)  | 14%                | 63%                |
|                                | 1.5         | 1.5        | Methanesulphonic acid (1) | 16%                | 66%                |

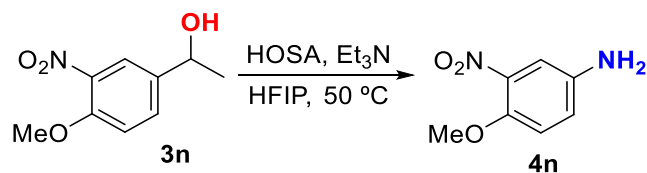

**4-Methoxy-3-nitroaniline (4n):** Following the general benzyl alcohol amination procedure, 1-(4-methoxy-3-nitrophenyl)ethan-1-ol (50 mg, 0.253 mmol), Et<sub>3</sub>N (105 μL, 0.759 mmol), and HOSA (85 mg, 0.759 mmol) were stirred at 50 °C in HFIP (2 mL) for 6 h. Chromatographic purification of the crude product afforded **4n** (28 mg, 73%) as a pale yellow solid mp 50-52 °C (lit.<sup>29</sup> 51-53 °C), whose spectral data were in agreement with literature values.<sup>29</sup> TLC: R<sub>f</sub> ≈ 0.5 (40% EtOAc/hexanes). <sup>1</sup>H NMR (400 MHz, CDCl<sub>3</sub>) δ 7.18 (d, *J* = 2.8 Hz, 1H), 6.95–6.83 (m, 2H), 3.87 (s, 3H), 3.61 (s, 2H); <sup>13</sup>C NMR (101 MHz, CDCl<sub>3</sub>) δ 146.09, 140.13, 121.15, 115.67, 111.69, 57.32.

Note: 1.5 equiv of each HOSA and TEA at 50 °C for 12 h gave **4n** in 21% (8 mg) yield and unreacted starting material 68% (34 mg).

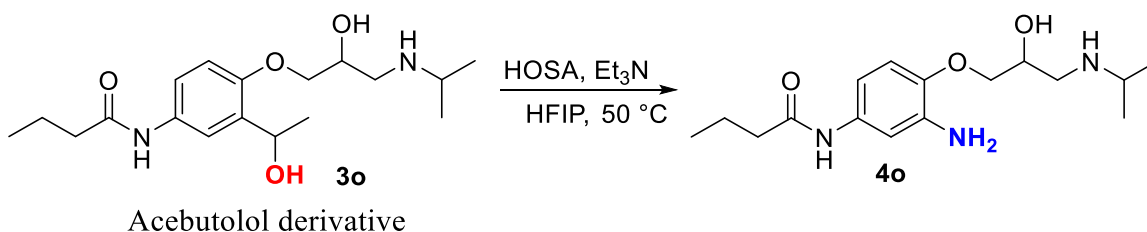

***N*-(3-Amino-4-(2-hydroxy-3-(isopropylamino)propoxy)phenyl)butyramide (4o):** Following the general benzyl alcohol amination procedure, *N*-(4-(2-hydroxy-3-(isopropylamino)propoxy)-3-(1-hydroxyethyl)phenyl)butyramide (30 mg, 0.080 mmol), Et<sub>3</sub>N (33 μL, 0.240 mmol), and HOSA (27 mg, 0.240 mmol) were stirred at 50 °C in HFIP (2 mL) for 5 h. Chromatographic purification of the crude product afforded **4o** (17 mg, 72%) as a yellow oil. TLC: R<sub>f</sub> ≈ 0.5 (20% MeOH/CH<sub>2</sub>Cl<sub>2</sub>). <sup>1</sup>H NMR (400 MHz, CD<sub>3</sub>OD) δ 7.04 (d, *J* = 2.2 Hz, 1H), 6.82 – 6.74 (m, 2H), 4.13–4.06 (m, 1H), 4.01 – 3.88 (m, 2H), 3.02 – 2.90 (m, 2H), 2.79 (dd, *J* = 12.2, 8.8 Hz, 1H), 2.29 (t, *J* = 7.4 Hz, 2H), 1.69 (q, *J* = 7.4 Hz, 2H), 1.16 (dd, *J* = 6.4, 2.7 Hz, 6H), 0.98 (t, *J* = 7.4 Hz, 3H); <sup>13</sup>C NMR (101 MHz, CD<sub>3</sub>OD) δ 174.23, 144.89, 138.38, 133.81, 113.23, 111.60, 109.77, 72.58, 69.31, 50.44, 50.13, 39.79, 21.71, 21.66, 20.42, 14.00. HRMS (ESI, *m/z*): calcd. for [M+H]<sup>+</sup>, C<sub>16</sub>H<sub>27</sub>N<sub>3</sub>O<sub>3</sub><sup>+</sup> 310.2125; found 310.2130.

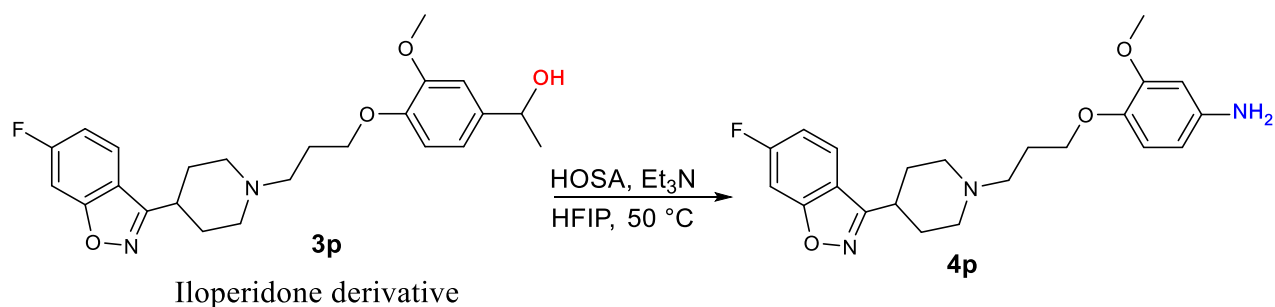

**4-(3-(4-(6-Fluorobenzo[d]isoxazol-3-yl)piperidin-1-yl)propoxy)-3-methoxyaniline (4p):**

Following the general benzyl alcohol amination procedure, 1-(4-(3-(4-(6-fluorobenzo[d]isoxazol-3-yl)piperidin-1-yl)propoxy)-3-methoxyphenyl)ethan-1-ol<sup>30</sup> (30 mg, 0.070 mmol), Et<sub>3</sub>N (7 μL, 0.105 mmol), and HOSA (11 mg, 0.105 mmol) were stirred at 50 °C in HFIP (2 mL) for 1 h. Chromatographic purification of the crude product afforded **4p** (24 mg, 86%) as a yellow oil whose spectral data were in agreement with literature values.<sup>31</sup> TLC: *R<sub>f</sub>* ≈ 0.5 (40% EtOAc/hexanes). <sup>1</sup>H NMR (400 MHz, CDCl<sub>3</sub>) δ 7.70 (dd, *J* = 8.7, 5.1 Hz, 1H), 7.23 (dd, *J* = 8.5, 2.1 Hz, 1H), 7.05 (td, *J* = 8.9, 2.1 Hz, 1H), 6.76 (d, *J* = 8.4 Hz, 1H), 6.30 (d, *J* = 2.5 Hz, 1H), 6.22 (dd, *J* = 8.4, 2.6 Hz, 1H), 4.01 (t, *J* = 6.6 Hz, 2H), 3.81 (s, 3H), 3.45 (br s, 2H), 3.14–3.00 (m, 3H), 2.59 (t, *J* = 7.4 Hz, 2H), 2.26–1.89 (m, 8H); <sup>13</sup>C NMR (151 MHz, CDCl<sub>3</sub>) δ 165.03, 164.03, 163.94, 163.37, 161.27, 150.79, 141.43, 141.24, 122.83, 122.76, 117.41, 117.40, 116.24, 112.52, 112.36, 106.68, 101.01, 97.64, 97.46, 68.89, 55.92, 55.58, 53.65, 34.72, 30.62, 27.05.

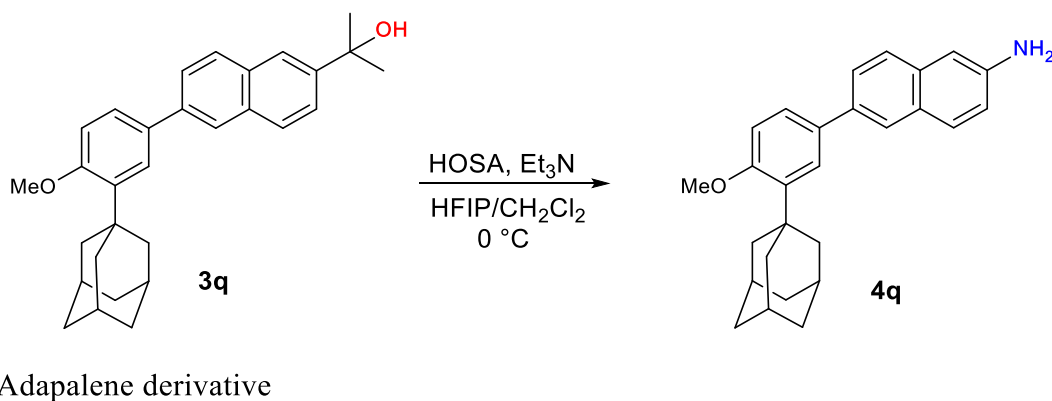

**6-(3-((3r,5r,7r)-Adamantan-1-yl)-4-methoxyphenyl)naphthalen-2-amine (4q):**

Following the general benzyl alcohol amination procedure, 2-(6-(3-((3r,5r,7r)-adamantan-1-yl)-4-methoxyphenyl)naphthalen-2-yl)propan-2-ol (30 mg, 0.070 mmol), Et<sub>3</sub>N (29 μL, 0.210 mmol), and HOSA (23 mg, 0.210 mmol) were stirred at 0 °C in a mixture of HFIP/CH<sub>2</sub>Cl<sub>2</sub> (1.5 mL, 2:1) for 3 h. Chromatographic purification of the crude product afforded **4q** (21 mg, 80%) as a white solid mp 250–252 °C (lit.<sup>31</sup> 250–252 °C), whose spectral data were in agreement with literature values.<sup>31</sup> TLC: *R<sub>f</sub>* ≈ 0.5 (20% EtOAc/hexanes). <sup>1</sup>H NMR (400 MHz, CDCl<sub>3</sub>) δ 7.85 (d, *J* = 1.5 Hz, 1H), 7.72 (d, *J* = 8.7 Hz, 1H), 7.67–7.59 (m, 2H), 7.55 (d, *J* = 2.3 Hz, 1H), 7.49 (dd, *J* = 8.4, 2.3 Hz, 1H), 7.04 (d, *J* = 2.3 Hz, 1H), 7.01–6.95 (m, 2H), 3.89 (s, 3H), 2.23–2.14 (m, 6H), 2.13–2.06 (m, 3H), 1.85–1.74 (m, 6H); <sup>13</sup>C NMR (151 MHz, CDCl<sub>3</sub>) δ 158.33, 143.47, 138.86, 135.98,

133.76, 133.63, 129.57, 128.56, 126.35, 125.80, 125.39, 125.13, 118.75, 112.17, 109.02, 55.31, 40.75, 37.29, 29.26.

**Test for Identification of byproduct and confirmation for imine hydrolysis:**

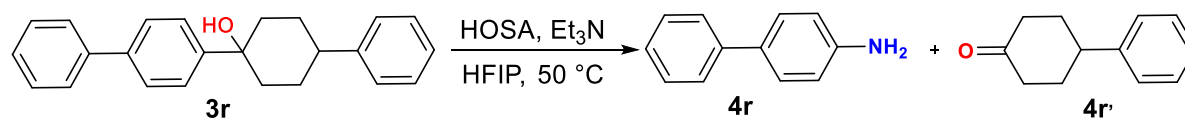

**[1,1'-Biphenyl]-4-amine (4r):** Following the general benzyl alcohol amination procedure, 1-((1,1'-biphenyl)-4-yl)-4-phenylcyclohexan-1-ol<sup>32</sup> (50 mg, 0.152 mmol), Et<sub>3</sub>N (29  $\mu$ L, 0.152 mmol), and HOSA (17 mg, 0.152 mmol) were stirred at 50 °C in HFIP (1.5 mL) for 2 h. Chromatographic purification of the crude product afforded 4r (11 mg, 45%) as a solid<sup>31</sup> and 4r' (10 mg, 38%) as a white solid<sup>32</sup> whose spectral data were in agreement with literature values.

**[1,1'-Biphenyl]-4-amine (4r):** TLC: R<sub>f</sub>  $\approx$  0.5 (20% EtOAc/hexanes). <sup>1</sup>H NMR (400 MHz, CDCl<sub>3</sub>)  $\delta$  7.56–7.52 (m, 2H), 7.46–7.36 (m, 4H), 7.28 (d, *J* = 7.4 Hz, 1H), 6.77 (d, *J* = 8.4 Hz, 2H), 3.73 (br s, 2H). <sup>13</sup>C NMR (101 MHz, CDCl<sub>3</sub>)  $\delta$  145.96, 141.29, 131.73, 128.79, 128.15, 126.54, 126.39, 115.52.

Note: Using HOSA (1.5 equiv) and Et<sub>3</sub>N (1.5 equiv) provided 4r (17 mg, 67%) and 4r' (11 mg, 45%).

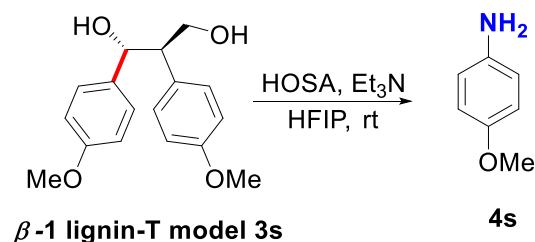

**4-Methoxyaniline (4s):** Following the general benzyl alcohol amination procedure, 1,2-bis(4-methoxyphenyl)propane-1,3-diol<sup>33</sup> (50 mg, 0.173 mmol), Et<sub>3</sub>N (36  $\mu$ L, 0.260 mmol), and HOSA (29 mg, 0.260 mmol) were stirred at rt in HFIP (1.2 mL) for 5 h. Chromatographic purification of the crude product afforded 4-methoxyaniline 4s (13 mg, 63%) as a solid whose spectral data were in agreement with literature values.<sup>31</sup> TLC: R<sub>f</sub>  $\approx$  0.5 (30% EtOAc/hexanes). <sup>1</sup>H NMR (400 MHz, CDCl<sub>3</sub>)  $\delta$  6.75 (d, *J* = 8.7 Hz, 2H), 6.65 (d, *J* = 8.8 Hz, 2H), 3.75 (s, 3H), 3.44 (br s, 2H). <sup>13</sup>C NMR (101 MHz, CDCl<sub>3</sub>)  $\delta$  152.93, 139.99, 116.55, 114.91, 55.83.

### Table 3 Experimental Procedures and Analytical Data

**General procedure for allyl alcohol nitrilation:** Allylic alcohol (1 equiv) was added to a stirring equimolar solution of HOSA and Et<sub>3</sub>N (4 equiv) at 0 °C in HFIP (0.15 M) under an argon atmosphere. After 15 min, the reaction mixture was warmed to rt-50 °C. After complete consumption (monitored via TLC), the rt reaction mixture was diluted with CH<sub>2</sub>Cl<sub>2</sub> (equal vol), washed with saturated aq. Na<sub>2</sub>CO<sub>3</sub>, brine, dried over anhydrous Na<sub>2</sub>SO<sub>4</sub>, and concentrated in

vacuo. The crude residue was purified chromatographically using MeOH/CH<sub>2</sub>Cl<sub>2</sub> or EtOAc/hexanes as eluent to furnish the nitriles. Variations in reaction conditions are noted in the Table 3 legends for select substrates.

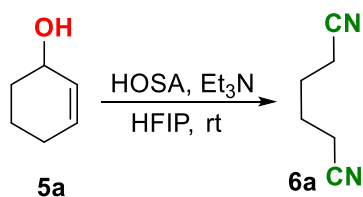

**Adiponitrile (6a):** Following the general allyl alcohol nitrilation procedure, cyclohex-2-en-1-ol (**5a**) (50 mg, 0.510 mmol), Et<sub>3</sub>N (284  $\mu$ L, 2.040 mmol), and HOSA (230 mg, 2.040 mmol) were stirred at rt in HFIP (3 mL) for 24 h. Chromatographic purification of the crude product afforded **6a** (41 mg, 75%) as an oil whose spectral data were in agreement with literature values.<sup>34</sup> TLC: R<sub>f</sub>  $\approx$  0.5 (10% EtOAc/hexanes). <sup>1</sup>H NMR (400 MHz, CDCl<sub>3</sub>)  $\delta$  2.49–2.35 (m, 4H), 1.90–1.73 (m, 4H); <sup>13</sup>C NMR (101 MHz, CDCl<sub>3</sub>)  $\delta$  118.79, 24.36, 16.75.

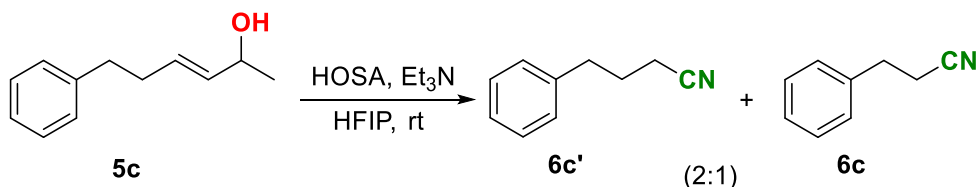

**Mixture of 4-Phenylbutanenitrile (6c) and 3-phenylpropanenitrile (6c')**: Following the general allyl alcohol nitrilation procedure, (*E*)-6-phenylhex-3-en-2-ol (**5c**) (50 mg, 0.179 mmol)<sup>35</sup>, Et<sub>3</sub>N (55  $\mu$ L, 0.179 mmol), and HOSA (44 mg, 0.179 mmol) were stirred at rt in HFIP (2 mL) for 24 h. Chromatographic purification of the crude product afforded **6c'** and **6c** (33 mg, 82%, 2:1 as determined by <sup>1</sup>H NMR) as an inseparable oil whose spectral data were in agreement with literature values.<sup>34</sup> TLC: R<sub>f</sub>  $\approx$  0.5 (5% EtOAc/hexanes). **6c'**: <sup>1</sup>H NMR (400 MHz, CDCl<sub>3</sub>)  $\delta$  7.42–7.08 (m, 5H), 2.79 (t, *J* = 7.4 Hz, 2H), 2.32 (t, *J* = 7.1 Hz, 2H), 1.99 (p, *J* = 7.2 Hz, 2H). **6c**: <sup>1</sup>H NMR (400 MHz, CDCl<sub>3</sub>)  $\delta$  7.42–7.08 (m, 5H), 2.96 (t, *J* = 7.4 Hz, 2H), 2.62 (t, *J* = 7.4 Hz, 2H).

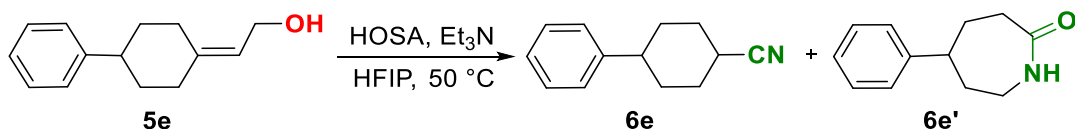

**4-Phenylcyclohexane-1-carbonitrile (6e) and 5-Phenylazepan-2-one (6e')**: Following the general allyl alcohol nitrilation procedure, 2-(4-phenylcyclohexylidene)ethan-1-ol<sup>37</sup> (50 mg, 0.247 mmol), Et<sub>3</sub>N (138  $\mu$ L, 0.990 mmol), and HOSA (111 mg, 0.990 mmol) were stirred at 50  $^{\circ}$ C in HFIP (3 mL) for 14 h. Chromatographic purification of the crude product afforded **6e** (9 mg, 21%) as an oil and **6e'** (28 mg, 61%) as a creamy solid. Spectral data for both were in agreement with literature values<sup>38,39</sup>.

**6e**<sup>38</sup> (85:15 dr by <sup>13</sup>C NMR): TLC: R<sub>f</sub>  $\approx$  0.5 (10% EtOAc/hexane). <sup>1</sup>H NMR (400 MHz, CDCl<sub>3</sub>)  $\delta$  7.36–7.28 (m, 2H), 7.27–7.15 (m, 3H), 3.10–2.95 (m, 1H), 2.58–2.47 (m, 1H), 2.31–1.99 (m, 2H),

1.94–1.83 (m, 3H), 1.77–1.63 (m, 2H), 1.57–1.41 (m, 1H); <sup>13</sup>C NMR (151 MHz, CDCl<sub>3</sub>) δ 146.16, 145.92, 128.67, 128.65, 126.92, 126.75, 126.57, 126.51, 122.78, 122.13, 43.72, 42.97, 32.82, 30.31, 30.04, 29.84, 28.88, 28.13, 26.85.

**6e**<sup>39</sup>: mp 137–139 °C (lit.<sup>37</sup> 138–140 °C), TLC: R<sub>f</sub> ≈ 0.5 (10% MeOH/CH<sub>2</sub>Cl<sub>2</sub>). <sup>1</sup>H NMR (400 MHz, CDCl<sub>3</sub>) δ 7.34–7.27 (m, 2H), 7.25–7.14 (m, 3H), 6.49 (br s, 1H), 3.45–3.24 (m, 2H), 2.76 (tt, *J* = 12.1, 3.5 Hz, 1H), 2.68–2.51 (m, 2H), 2.07–1.92 (m, 2H), 1.88–1.63 (m, 2H); <sup>13</sup>C NMR (101 MHz, CDCl<sub>3</sub>) δ 178.57, 146.46, 128.77, 126.77, 126.66, 48.97, 42.26, 37.51, 35.96, 30.66.

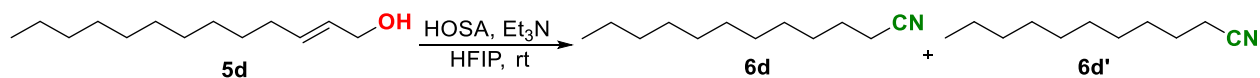

**Mixture of Dodecanenitrile (6d) and Undecanenitrile (6d')**: Following the general allyl alcohol nitrilation procedure, (*E*)-tridec-2-en-1-ol (**5d**) (50 mg, 0.252 mmol), Et<sub>3</sub>N (140 μL, 1.010 mmol), and HOSA (114 mg, 0.1010 mmol) were stirred at rt in HFIP (3 mL) for 24 h. Chromatographic purification of the crude product afforded a mixture of **6d** and **6d'** (32 mg, 71%, 1.3:1 via mass spec analysis LC-HRMS) as an inseparable oil whose spectral data were in agreement with literature values.<sup>38,39</sup> TLC: R<sub>f</sub> ≈ 0.5 (40% EtOAc/hexanes). <sup>1</sup>H NMR (400 MHz, CDCl<sub>3</sub>) δ 2.33 (t, *J* = 7.1 Hz, 2H), 1.65 (p, *J* = 7.2 Hz, 2H), 1.51–1.39 (m, 2H), 1.35–1.21 (m, 14H), 0.88 (t, *J* = 6.7 Hz, 3H); <sup>13</sup>C NMR (151 MHz, CDCl<sub>3</sub>) δ 120.05, 32.03, 31.99, 31.94, 29.85, 29.69, 29.65, 29.60, 29.44, 29.40, 29.31, 28.91, 28.81, 25.51, 22.82, 22.81, 22.78, 17.28, 14.27, 14.26, 14.24.

| Index | Sample Name | Formula | Adduct / Charge    | Precursor Mass | Found At Mass | Expected RT | Area    | Mass Error (p...) |
|-------|-------------|---------|--------------------|----------------|---------------|-------------|---------|-------------------|
| 1     | RG-V-49-11C | C12H23N | [M+H] <sup>+</sup> | 182.190        | 182.1901      | 2.97        | 7.544e5 | -1.5              |
| 2     | RG-V-49-11C | C11H21N | [M+H] <sup>+</sup> | 168.175        | 168.1746      | 2.92        | 5.762e5 | -0.2              |

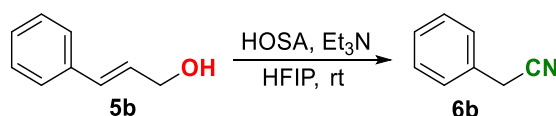

**2-Phenylacetonitrile (6b)**: Following the general allyl alcohol nitrilation procedure, (*E*)-3-phenylprop-2-en-1-ol (**5b**) (50 mg, 0.337 mmol), Et<sub>3</sub>N (188 μL, 1.351 mmol), and HOSA (152 mg, 0.1351 mmol) were stirred at rt in HFIP (3 mL) for 16 h. Chromatographic purification of the crude product afforded **6b** (30 mg, 76%) as an oil whose spectral data were in agreement with literature values.<sup>40</sup> TLC: R<sub>f</sub> ≈ 0.5 (10% EtOAc/hexanes). <sup>1</sup>H NMR (400 MHz, CDCl<sub>3</sub>) δ 7.43–7.29 (m, 5H), 3.76 (s, 2H); <sup>13</sup>C NMR (101 MHz, CDCl<sub>3</sub>) δ 130.01, 129.22, 128.13, 128.00, 117.98, 23.68.

## Table 4 Experimental Procedures and Analytical Data

**General procedure for *N*-heterocyclic synthesis:** Cyclic benzylic alcohol (1 equiv) was added to a stirring equimolar solution of HOSA and Et<sub>3</sub>N (2.2 equiv) at 0 °C in HFIP (0.15 M) under an argon atmosphere. After 15 min, the reaction mixture was warmed to rt–40 °C. After complete consumption (monitored via TLC), the rt reaction mixture was diluted with CH<sub>2</sub>Cl<sub>2</sub> (equal vol), washed with saturated aq. Na<sub>2</sub>CO<sub>3</sub>, brine, dried over anhydrous Na<sub>2</sub>SO<sub>4</sub>, and concentrated in

vacuo. The crude residue was purified chromatographically using MeOH/CH<sub>2</sub>Cl<sub>2</sub> or EtOAc/hexanes as eluent to furnish the *N*-heterocycles. Variations in reaction conditions are noted in the Table 4 legends for select substrates.

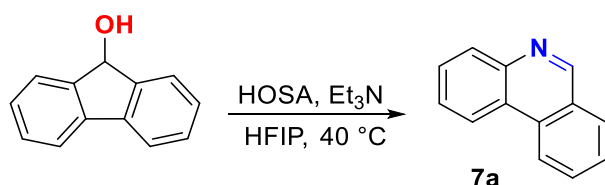

**Phenanthridine (7a):** Following the general *N*-heterocyclic synthesis procedure, 9*H*-fluoren-9-ol (50 mg, 0.274 mmol), Et<sub>3</sub>N (84 μL, 0.604 mmol), and HOSA (68 mg, 0.604 mmol) were stirred at 40 °C in HFIP (2 mL) for 14 h. Chromatographic purification of the crude product afforded **7a** (37 mg, 75%) as a white solid mp 107-109 °C (lit.<sup>39</sup> 106-108 °C), whose spectral data were in agreement with literature values.<sup>41</sup> TLC: R<sub>f</sub> ≈ 0.5 (5% EtOAc/hexanes). <sup>1</sup>H NMR (400 MHz, CDCl<sub>3</sub>) δ 9.29 (s, 1H), 8.65–8.50 (m, 2H), 8.20 (dd, *J* = 8.1, 1.5 Hz, 1H), 8.04 (dd, *J* = 8.0, 1.4 Hz, 1H), 7.85 (ddd, *J* = 8.4, 7.0, 1.4 Hz, 1H), 7.80–7.61 (m, 3H); <sup>13</sup>C NMR (101 MHz, CDCl<sub>3</sub>) δ 153.66, 144.54, 132.67, 131.14, 130.23, 128.89, 128.81, 127.61, 127.21, 126.49, 124.22, 122.33, 121.98.

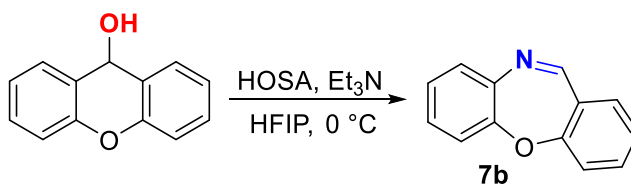

**Dibenzo[b,f][1,4]oxazepine (7b):** Following the general *N*-heterocyclic synthesis procedure, 9*H*-xanthen-9-ol (50 mg, 0.252 mmol), Et<sub>3</sub>N (42 μL, 0.303 mmol), and HOSA (34 mg, 0.303 mmol) were stirred at 0 °C in HFIP (2 mL) for 5 h. Chromatographic purification of the crude product afforded **7b** (34 mg, 70%) a yellow solid mp 75-77 °C (lit.<sup>42</sup> 74-77 °C), whose spectral data were in agreement with literature values.<sup>42</sup> TLC: R<sub>f</sub> ≈ 0.5 (20% EtOAc/hexanes). <sup>1</sup>H NMR (400 MHz, CDCl<sub>3</sub>) δ 8.53 (s, 1H), 7.46 (td, *J* = 8.1, 1.7 Hz, 1H), 7.36 (td, *J* = 7.0, 1.8 Hz, 2H), 7.25–7.08 (m, 5H); <sup>13</sup>C NMR (101 MHz, CDCl<sub>3</sub>) δ 160.72, 160.57, 152.83, 140.63, 133.44, 130.22, 129.35, 128.90, 127.47, 125.81, 125.18, 121.48, 120.83.

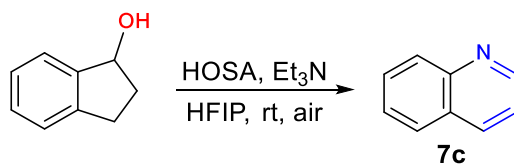

**Quinoline (7c):** Following the general *N*-heterocyclic synthesis procedure, 2,3-dihydro-1*H*-inden-1-ol (50 mg, 0.373 mmol), Et<sub>3</sub>N (114 μL, 0.820 mmol), and HOSA (92 mg, 0.820 mmol) were stirred at rt in HFIP (2 mL) open to the atmosphere for 6 h. Chromatographic purification of the crude product afforded **7c** (32 mg, 68%) as an oil whose spectral data were in agreement with literature values.<sup>43</sup> TLC: R<sub>f</sub> ≈ 0.5 (40% EtOAc/hexanes). <sup>1</sup>H NMR (400 MHz, CDCl<sub>3</sub>) δ 8.92 (dd,



$J = 4.2, 1.7$  Hz, 1H), 8.19–8.05 (m, 2H), 7.85–7.79 (m, 1H), 7.72 (ddd,  $J = 8.5, 6.9, 1.5$  Hz, 1H), 7.55 (ddd,  $J = 8.1, 6.9, 1.2$  Hz, 1H), 7.40 (dd,  $J = 8.3, 4.2$  Hz, 1H);  $^{13}\text{C}$  NMR (101 MHz,  $\text{CDCl}_3$ )  $\delta$  150.52, 148.39, 136.21, 129.60, 129.57, 128.42, 127.91, 126.68, 121.20.

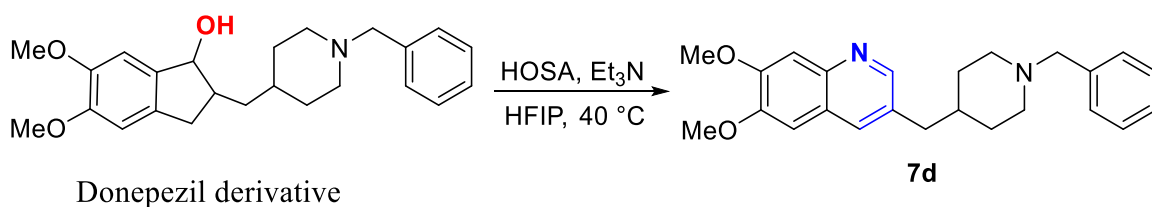

**3-((1-Benzylpiperidin-4-yl)methyl)-6,7-dimethoxyquinoline (7d):** Following the general *N*-heterocyclic synthesis procedure, 2-((1-benzylpiperidin-4-yl)methyl)-5,6-dimethoxy-2,3-dihydro-1H-inden-1-ol<sup>44</sup> (50 mg, 0.119 mmol),  $\text{Et}_3\text{N}$  (36  $\mu\text{L}$ , 0.263 mmol), and HOSA (29 mg, 0.263 mmol) were stirred at 40 °C in HFIP (2 mL) for 5 h. Chromatographic purification of the crude product afforded **7d** (34 mg, 76%) as an oil. TLC:  $R_f \approx 0.5$  (20% MeOH/ $\text{CH}_2\text{Cl}_2$ ).  $^1\text{H}$  NMR (400 MHz,  $\text{CD}_3\text{OD}$ )  $\delta$  8.44 (d,  $J = 2.1$  Hz, 1H), 7.95 (d,  $J = 2.1$  Hz, 1H), 7.35–7.23 (m, 6H), 7.21 (s, 1H), 3.97 (s, 3H), 3.96 (s, 3H), 3.50 (s, 2H), 2.94–2.85 (m, 2H), 2.70 (d,  $J = 6.6$  Hz, 2H), 1.99 (td,  $J = 12.1, 2.4$  Hz, 2H), 1.71–1.57 (m, 3H), 1.45–1.28 (m, 2H);  $^{13}\text{C}$  NMR (151 MHz,  $\text{CD}_3\text{OD}$ )  $\delta$  152.54, 150.25, 148.51, 142.82, 136.70, 134.60, 131.59, 129.53, 127.90, 127.09, 124.12, 105.70, 104.92, 62.84, 55.04, 54.99, 53.16, 39.36, 37.45, 31.11. HRMS (ESI,  $m/z$ ): calcd. for  $[\text{M}+\text{H}]^+$ ,  $\text{C}_{24}\text{H}_{28}\text{N}_2\text{O}_2^+$  377.2224; found 377.2238.

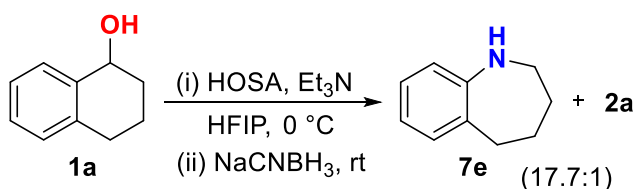

**Mixture of 2,3,4,5-Tetrahydro-1H-benzazepine (7e) and 2a:** To a stirring, 0 °C solution of HOSA (45 mg, 0.404 mmol) in HFIP (2 mL) was added  $\text{Et}_3\text{N}$  (56  $\mu\text{L}$ , 0.404 mmol) under an argon atmosphere. After 15 min, **1a** (50 mg, 0.337 mmol) was added and stirred at 0 °C. After 3 h (monitored by TLC),  $\text{NaCNBH}_3$  (41 mg, 0.674 mmol) was added and then the reaction mixture was stirred at rt. After 4 h, the reaction mixture was diluted with  $\text{H}_2\text{O}$  (10 mL) and  $\text{CH}_2\text{Cl}_2$  (10 mL), washed with saturated aq.  $\text{Na}_2\text{CO}_3$  (10 mL), brine (10 mL), dried over anhydrous  $\text{Na}_2\text{SO}_4$ , and concentrated *in vacuo*. The residue was purified chromatographically using a gradient of 20–30% EtOAc/hexanes to give **7e** (35 mg, 71%) as a pale yellow solid whose spectral data were in agreement with literature values.<sup>45</sup> mp 30–32 °C (lit.<sup>45</sup> 30–32 °C), and **2a** (4 mg, 4%) as an oil. **7e**: TLC:  $R_f \approx 0.5$  (20% EtOAc/hexanes).  $^1\text{H}$  NMR (400 MHz,  $\text{CDCl}_3$ )  $\delta$  7.11 (dd,  $J = 7.4, 1.5$  Hz, 1H), 7.04 (td,  $J = 7.6, 1.6$  Hz, 1H), 6.83 (td,  $J = 7.4, 1.2$  Hz, 1H), 6.74 (dd,  $J = 7.8, 1.2$  Hz, 1H), 3.65 (br s, 1H), 3.08–3.01 (m, 2H), 2.82–2.72 (m, 2H), 1.87–1.74 (m, 2H), 1.70–1.60 (m, 2H);  $^{13}\text{C}$  NMR (101 MHz,  $\text{CDCl}_3$ )  $\delta$  150.34, 133.89, 130.86, 126.67, 121.03, 119.50, 49.00, 36.14, 32.05, 27.00.

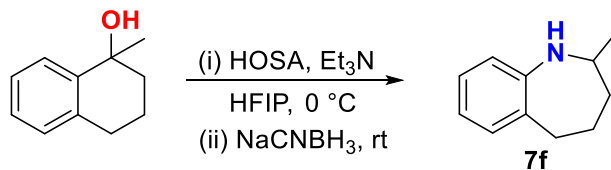

**2-Methyl-2,3,4,5-tetrahydro-1H-benzo[b]azepine (7f):** To a stirring, 0 °C solution of HOSA (41 mg, 0.369 mmol) in HFIP (2 mL) was added Et<sub>3</sub>N (51 μL, 0.369 mmol) under an argon atmosphere. After 15 min, the 1-methyl-1,2,3,4-tetrahydronaphthalen-1-ol (50 mg, 0.308 mmol) was added and stirred at 0 °C. After 30 min (monitored by TLC), NaCNBH<sub>3</sub> (38 μL, 0.616 mmol) was added and then the reaction mixture was stirred at rt. After 4 h, the reaction mixture was diluted with H<sub>2</sub>O (10 mL) and CH<sub>2</sub>Cl<sub>2</sub> (10 mL), washed with saturated aqueous Na<sub>2</sub>CO<sub>3</sub> (10 mL), brine (10 mL), dried over anhydrous Na<sub>2</sub>SO<sub>4</sub>, and concentrated *in vacuo*. The residue was purified chromatographically using a gradient of 20-30% EtOAc/hexanes to give **7f** (45 mg, 91%) as a white solid whose spectral data were in agreement with literature values.<sup>46</sup> mp 57-59 °C (lit.<sup>44</sup> 57-60 °C), TLC: R<sub>f</sub> ≈ 0.5 (20% EtOAc/hexanes). <sup>1</sup>H NMR (400 MHz, CDCl<sub>3</sub>) δ 7.11 (d, *J* = 7.5 Hz, 1H), 7.06 (td, *J* = 7.8, 1.6 Hz, 1H), 6.86 (td, *J* = 7.4, 1.3 Hz, 1H), 6.75 (d, *J* = 7.2 Hz, 1H), 3.39 (br s, 1H), 3.00–3.89 (m, 1H), 2.90–2.63 (m, 2H), 2.02–1.76 (m, 2H), 1.59–1.34 (m, 2H), 1.27 (d, *J* = 6.5 Hz, 3H); <sup>13</sup>C NMR (101 MHz, CDCl<sub>3</sub>) δ 149.02, 133.95, 130.64, 126.67, 121.06, 119.92, 53.85, 39.43, 35.65, 26.39, 24.21.

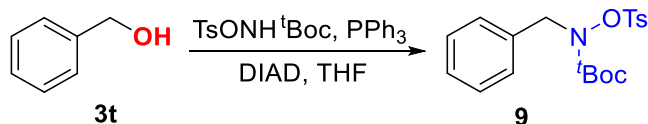

**tert-Butyl benzyl(tosyloxy)carbamate (9):** Diisopropyl azodicarboxylate (DIAD) (109 μL, 0.462 mmol) was added to a stirring, 0 °C solution of PPh<sub>3</sub> (145 mg, 0.555 mmol) in dry THF under an argon atmosphere. A white precipitate developed after stirring for about 10 min. After 30 min total, a solution of benzyl alcohol (**3t**) (50 mg, 0.462 mmol) in dry THF and neat *N*-tert-butyl tosyloxycarbamate (TsONHtBoc) (150 mg, 0.555 mmol) were added successively. The ice bath was removed after 1 h and the reaction mixture was stirred at rt. After 2 h, all volatiles were removed *in vacuo* and the residue was purified chromatographically using a gradient of 10-15% EtOAc/hexanes as eluent to furnish adduct **9** (160 mg, 91%) as a solid, mp 88-90 °C. TLC: R<sub>f</sub> ≈ 0.5 (20% EtOAc/hexanes). <sup>1</sup>H NMR (400 MHz, CDCl<sub>3</sub>) δ 7.87 (d, *J* = 7.9 Hz, 2H), 7.40–7.20 (m, 7H), 4.76 (s, 2H), 2.45 (s, 3H), 1.19 (s, 9H); <sup>13</sup>C NMR (101 MHz, CDCl<sub>3</sub>) δ 155.31, 145.86, 134.97, 131.38, 129.83, 129.68, 129.05, 128.62, 128.17, 83.63, 56.40, 27.69, 21.84. HRMS (ESI, *m/z*): calcd. for [M+H]<sup>+</sup>, C<sub>19</sub>H<sub>23</sub>NO<sub>5</sub>S<sup>+</sup> 378.1370; found 378.1374.

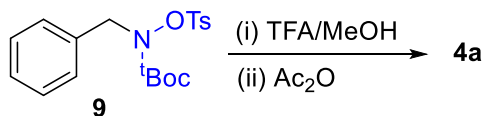

(iv) ***N*-phenylacetamide (4a):** To a stirring, 0 °C solution of **9** (100 mg, 0.265 mmol) in MeOH (3 mL, 1:2) was added trifluoroacetic acid (TFA) under an argon atmosphere. After stirring for 5

h, the reaction mixture was diluted with H<sub>2</sub>O (10 mL) and CH<sub>2</sub>Cl<sub>2</sub> (10 mL), washed with saturated aqueous Na<sub>2</sub>CO<sub>3</sub> (10 mL), brine (10 mL), dried over anhydrous Na<sub>2</sub>SO<sub>4</sub>, and concentrated *in vacuo*. The residue (65 mg) was acetylated without purification (*vide infra*).

Acetic anhydride (0.32 mL, 3.464 mmol) was added to stirring, rt solution of the above crude material (65 mg, 0.698 mmol) in dry CH<sub>2</sub>Cl<sub>2</sub> (5 mL). After 15 h, all volatiles were removed *in vacuo* and the crude residue was purified chromatographically using 70-80% EtOAc/hexanes as eluent to furnish **4a** (30 mg, 63%) as a solid whose spectral data were in agreement with literature values (*vide supra*).

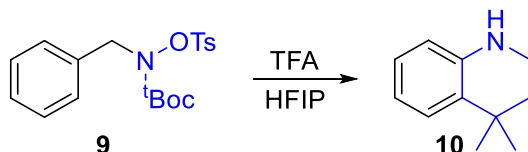

Plausible mechanism

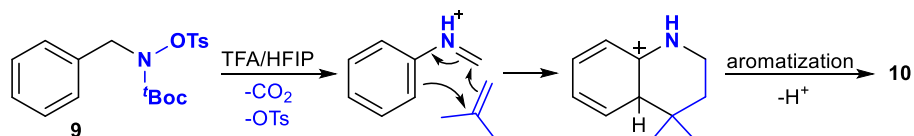

**4,4-Dimethyl-1,2,3,4-tetrahydroquinoline (10):** To a stirring, 0 °C solution of adduct **9** (100 mg, 0.265 mmol) in HFIP (2 mL) was added trifluoroacetic acid (TFA) (101 μL, 1.326 mmol, 5 equiv) under an argon atmosphere. After 30 min, the reaction mixture was diluted with H<sub>2</sub>O (10 mL) and CH<sub>2</sub>Cl<sub>2</sub> (10 mL), washed with saturated aqueous Na<sub>2</sub>CO<sub>3</sub> (10 mL), brine (10 mL), dried over anhydrous Na<sub>2</sub>SO<sub>4</sub>, and concentrated *in vacuo*. The residue was purified chromatographically to give **10** (45 mg, 78%) as an oil whose spectral data were in agreement with literature values.<sup>47</sup> TLC: R<sub>f</sub> ≈ 0.6 (20% EtOAc/hexanes). <sup>1</sup>H NMR (400 MHz, CDCl<sub>3</sub>) δ 7.19 (dd, *J* = 7.8, 1.5 Hz, 1H), 6.96 (ddd, *J* = 8.0, 7.2, 1.5 Hz, 1H), 6.70–6.63 (m, 1H), 6.50 (dd, *J* = 8.0, 1.3 Hz, 1H), 3.39–3.13 (m, 2H), 1.82–1.69 (m, 2H), 1.30 (s, 6H); <sup>13</sup>C NMR (101 MHz, CDCl<sub>3</sub>) δ 143.21, 130.55, 126.60, 126.51, 117.40, 114.51, 38.52, 37.30, 31.73, 31.05.

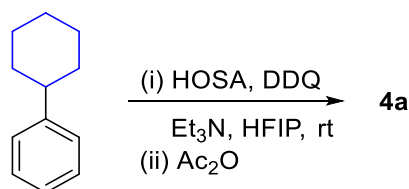

(i) ***N*-Phenylacetamide (4a):** Following the general benzyl alcohol amination procedure, cyclohexyl benzene (50 mg, 0.312 mmol), Et<sub>3</sub>N (65 μL, 0.468 mmol), HOSA (52 mg, 0.468 mmol) and DDQ (70 mg, 0.312 mmol), were stirred at rt in HFIP (2 mL) for 6 h. After extractive isolation using CH<sub>2</sub>Cl<sub>2</sub> (3 × 10 mL) and concentration *in vacuo*, the residue (56 mg) was acetylated (*vide infra*) to facilitate isolation and identification.

Acetic anhydride (0.30 mL, 3.279 mmol) was added to a stirring, rt solution of the above residue (61 mg, 0.655 mmol) in dry CH<sub>2</sub>Cl<sub>2</sub> (5 mL). After 15 h, all volatiles were removed *in vacuo* and the crude residue was purified chromatographically using 70-80% EtOAc/hexanes as eluent to

furnish **4a** (28 mg, 67%) as a solid whose spectral data were in agreement with literature values (*vide supra*).

## References:

1. P.-P. Guo, K. Ding, *Tetrahedron Letters*. 2015, **56**, 4096–4100.
2. Y. Wang, N. Wang, J. Zhao, M. Sun, H. You, F. Fang, Z. Q. Liu, *ACS Catal.* 2020, **10**, 6603–6612.
3. M. R. Tremblay, R. P. Boivin, V. Luu-The, D. Poirier, *J Enzyme Inhib Med Chem.* 2005, **20**, 153–163.
4. E. Polo, N. Ibarra-Arellano, L. Prent-Peñaloza, A. Morales-Bayuelo, J. Henao, A. Galdámez, M. Gutiérrez, *Bioorg. Chem.* 2019, **90**, 103034.
5. J. R. Falck, L. L. Miller, F.R. Stermitz, *J. Am. Chem. Soc.* 1974, **96**, 2981–2986.
6. D. G. Ferry, E. G. McQueen, M. T. W. Hearn, *Proceedings of the University of Otago Medical School.* 1978, **56**, 44-46.
7. H. M. Ferraz, G. G. Bianco, C. C. Teixeira, L. H. Andrade, A. L. Porto, *Tetrahedron Asymmetry* 2007, **18**, 1070–1076.
8. D. P. Gavin, E. J. Murphy, A. M. Foley, I. A. Castilla, F. J. Reen, D. F. Woods, A. R. Maguire, *Adv. Synth. Catal.* 2019, **361**, 2466–2474.
9. S. V. Ankala, G. Fenteany, *Tetrahedron Letters* 2002, **43**, 4729–4732.
10. D. A. Baffoe, *Arkivoc*, 2012, **6**, 112-118.
11. A. Ohigashi, A. Kanda, S. Moriki, Y. Baba, N. Hashimoto, M. Okada, *Org. Process Res. Dev.* 2013, **17**, 658–665.
12. D. Shimbo, A. Shibata, M. Yudasaka, T. Maruyama, N. Tada, B. Uno, A. Itoh, *Organic Letters* 2019, **21**, 9769–9773.
13. A. E. Strom, J. F. Hartwig, *J. Org. Chem.* 2013, **78**, 8909–8914.
14. A. Lator, S. Gaillard, A. Poater, J.-L. Renaud, *Org. Lett.* 2018, **20**, 5985–5990.
15. G. D. Vo, J. F. Hartwig, *J. Am. Chem. Soc.* 2009, **131**, 11049–11061.
16. H. Gao, Z. Zhou, D. H. Kwon, J. Coombs, S. Jones, N. E. Behnke, D. H. Ess, L. Kürti, *Nat Chem.* 2017, **9**, 681–688.
17. H. Yue, L. Guo, X. Liu, Rueping, M. *Org. Lett.* 2017, **19**, 1788–1791.
18. E. Reimann, R. Hertel, J. Krauss, *Monatsh Chem.* 2008, **139**, 673–684.
19. M. Das, D. F. O’Shea, *J. Org. Chem.* 2014, **79**, 5595–5607.
20. W. Liu, L. Cao, Z. Zhang, G. Zhang, S. Huang, L. Huang, P. Zhao, X. *Org. Lett.* 2020, **22**, 2210–2214.
21. A. S. Oshchepkov, S. Aleksandr, S. Maksim, A. V. Anisimov, O. A. Fedorova, *Macroheterocycles*, 2015, **8**, 290-293.
22. L. Zhao, C. Hu, X. Cong, G. Deng, L. L. Liu, M. Luo, X. Zeng, *J. Am. Chem. Soc.* 2021, **143**, 1618–1629.
23. Q. Wang, K. Wu, Z. Yu, *Organometallics* 2016, **35**, 1251–1256.
24. G. E. Martinez, J. W. Nugent, A. R. Fout, *Organometallics*. 2018, **37**, 2941–2944.
25. I. Sarvi, M. Gholizadeh, M. Izadyar, *Catal Lett.* 2017, **147**, 1162–1171.

26. Bloom, P.C. et al. Heterocyclic carboxamide-containing thiourea derivatives containing a phenylenediamine group, useful as inhibitors of herpes viruses. *Appl.* (2000), WO 2000034258 A2 20000615.
27. R. G. Kalkhambkar, H. M. Savanur, *RSC Adv.* 2015, **5**, 60106–60113.
28. A. Granados, A. Shafir, A. Arrieta, F. P. Cossío, A. Vallribera, *J. Org. Chem.* 2020, **85**, 2142-2150.
29. M. V. R. Reddy, *J. Med. Chem.* 2013, **56**, 5562–5586.
30. J.T. Strupczewski, K.J. Bordeau, Y. Chiang, E.J. Glamkowski, P.G. Conway, R. Corbett, H.B. Hartman, M.R. Szewczak, C.A. Wilmot, G.C. Helsley, *J. Med. Chem.* 1995, **38**, 1119-1131.
31. J. Liu, X. Qiu, X. Huang, X. Luo, C. Zhang, J. Wei, J. Pan, Y. Liang, Y. Zhu, Q. Qin, S. Song, N. Jiao, *Nat Chem.* 2019, **11**, 71–77.
32. Domingo, C. Prieto, A. Castillo, L. Silva, J. F. Quilez del Moral, A. F. Barrero, *Adv. Synth. & Catal.* 2015, **357**, 3359-3364.
33. Z. Z. Zhou, M. Liu, C. J. Li, *ACS Catal.* 2017, **7**, 3344-3348.
34. Z.S. Qureshi, P.B. Sarawade, M. Albert, V. D'Elia, M.N. Hedhili, K. Köhler, J.M. Basset, 2015. *Chem. Cat. Chem.* 2015, **7**, 635 – 642.
35. M. Podunavac, J. J. Lacharity, K. E. Jones, A. Zakarian, *Org. Lett.* 2018, **20**, 4867–4870.
36. J.J. Ge, C.Z. Yao, M.M. Wang, H.X. Zheng, Y.B. Kang, Y. Li, *Org. Lett.* 2016, **18**, 228–231.
37. Y. Kaneko, Y. Kiyotsuka, H. P. Acharya, Y. Kobayashi, *Chem. Commun.* 2010, **46**, 5482–5484.
38. A. Xia, X. Xie, H. Chen, J. Zhao, C. Zhang, Y. Liu, *Org. Lett.* 2018, **20**, 7735–7739.
39. E. Chmielewska, P. Miszczyk, J. Kozłowska, M. Prokopowicz, P. Młynarz, P. Kafarski, *J. Organomet. Chem.* 2015, **785**, 84-91.
40. G. Wu, Y. Deng, C. Wu, Y. Zhang, J. Wang, *Angew. Chem. Int. Ed.* 2014, **53**, 10510 –10514.
41. Y.-Q. Huang, H.-J. Song, Y.-X. Liu, Q.-M. *Chem. Eur. J.* 2018, **24**, 2065 – 2069.
42. Y.-Y. Ren, Y.-Q. Wang, S. Liu, K. Pan, *ChemCatChem*, 2014, **6**, 2985 – 2992.
43. X. Cui, Y. Li, S. Bachmann, M. Scalone, A.E. Surkus, K. Junge, C. Topf, M. Beller, *J. Am. Chem. Soc.* 2015, **137**, 10652–10658.
44. K.K. Reddy, J.M. Babu, P.A. Kumar, E.R.R. Chandrashekar, V.T. Mathad, S. Eswaraiah, M.S. Reddy, K. Vyas, *J. Pharm. Biomed.* 2004, **35**, 1047–1058.
45. M.C. Frantz, L.P. Pellissier, E. Pflimlin, S. Loison, J. Gandía, C. Marsol, T. Durroux, B. Mouillac, J.A. Becker, J. Le Merrer, Valencia, C. *J. Med. Chem.* 2018, **61**, 8670–8692.
46. C. Xu, Y. Feng, F. Li, J. Han, Y.M. He, Q.H. Fan, A Synthetic route to chiral benzo-fused *N*-heterocycles via sequential intramolecular hydroamination and asymmetric hydrogenation of anilino-alkynes *Organometallics* 2019, **38**, 3979–3990.
47. J.X. Qiao, T.C. Wang, R. Ruel, C. Thibeault, A. L'Heureux, W.A. Schumacher, S.A. Spronk, S. Hiebert, G. Bouthillier, J. Lloyd, Z. Pi, *J. Med. Chem.* 2013, **56**, 9275–9295.

### <sup>1</sup>H/<sup>13</sup>C NMR Spectra

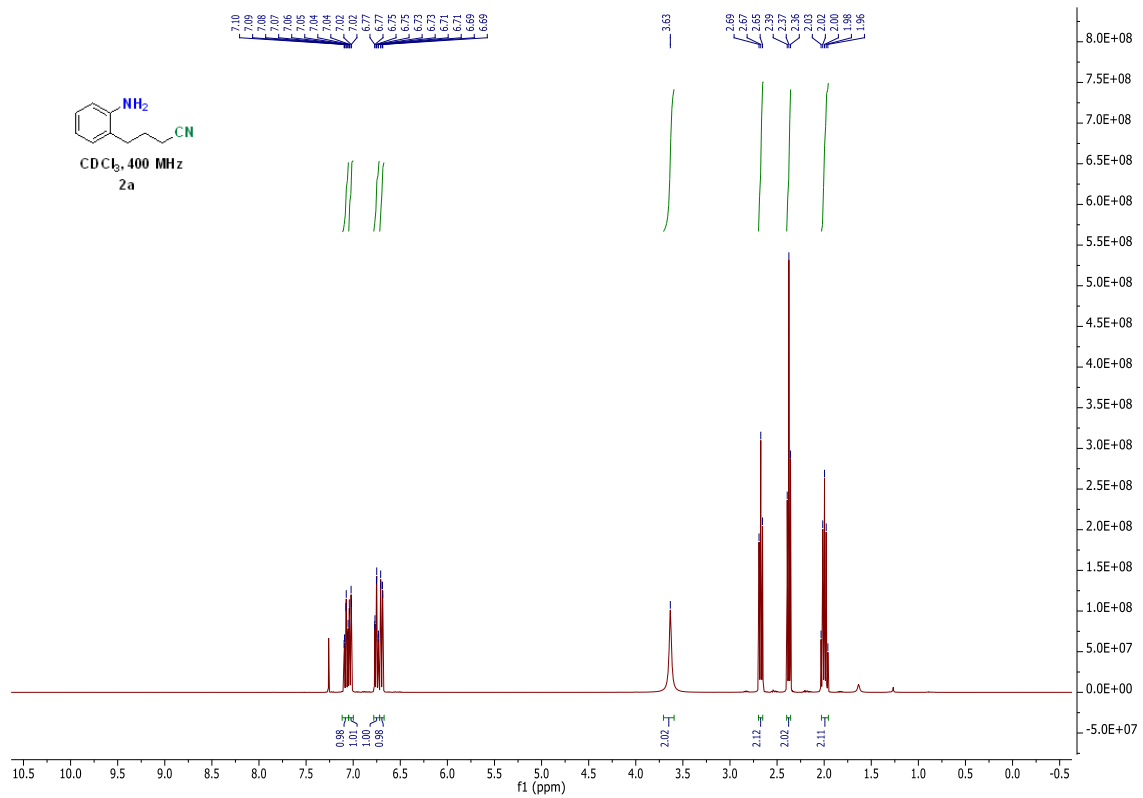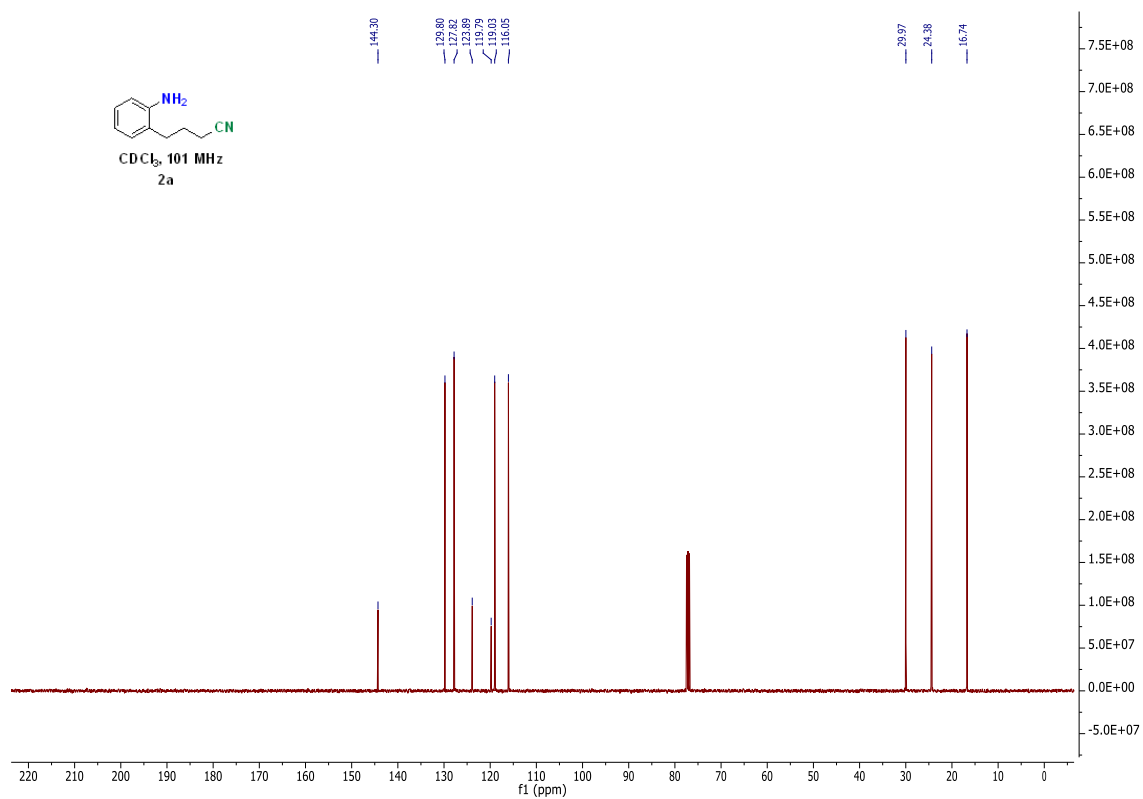

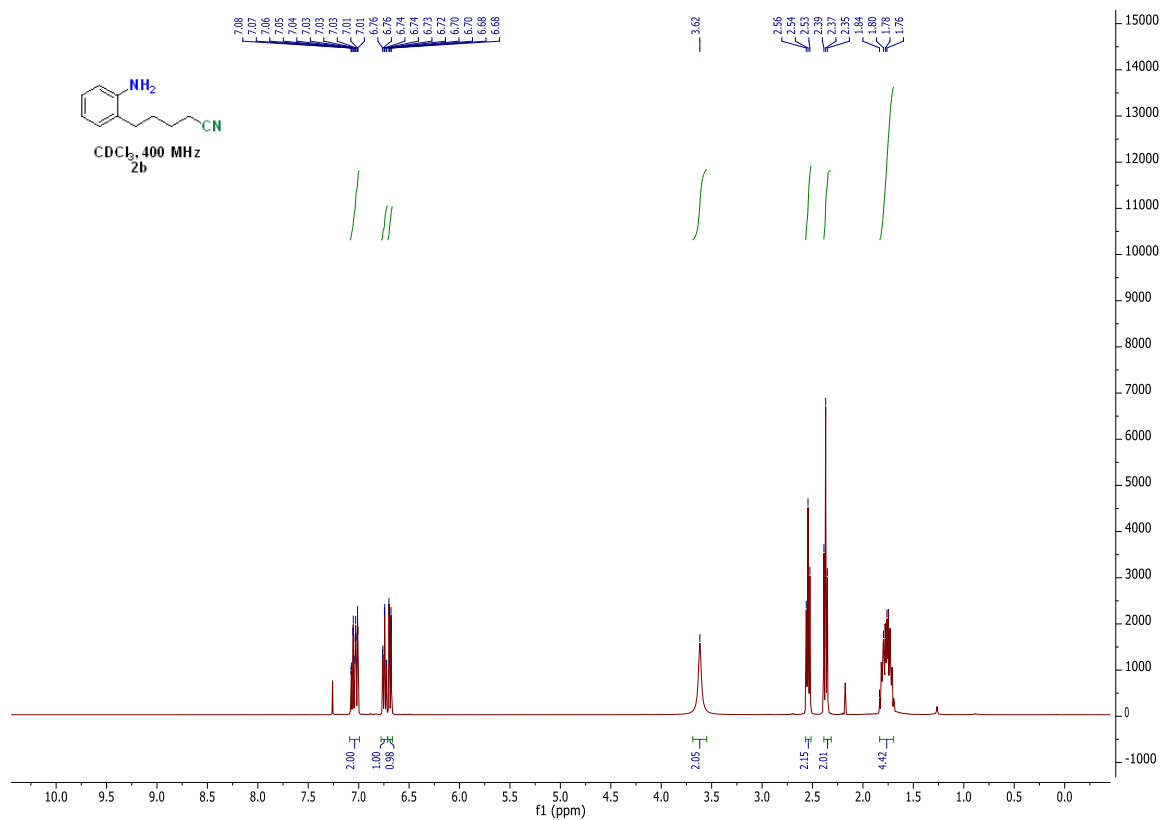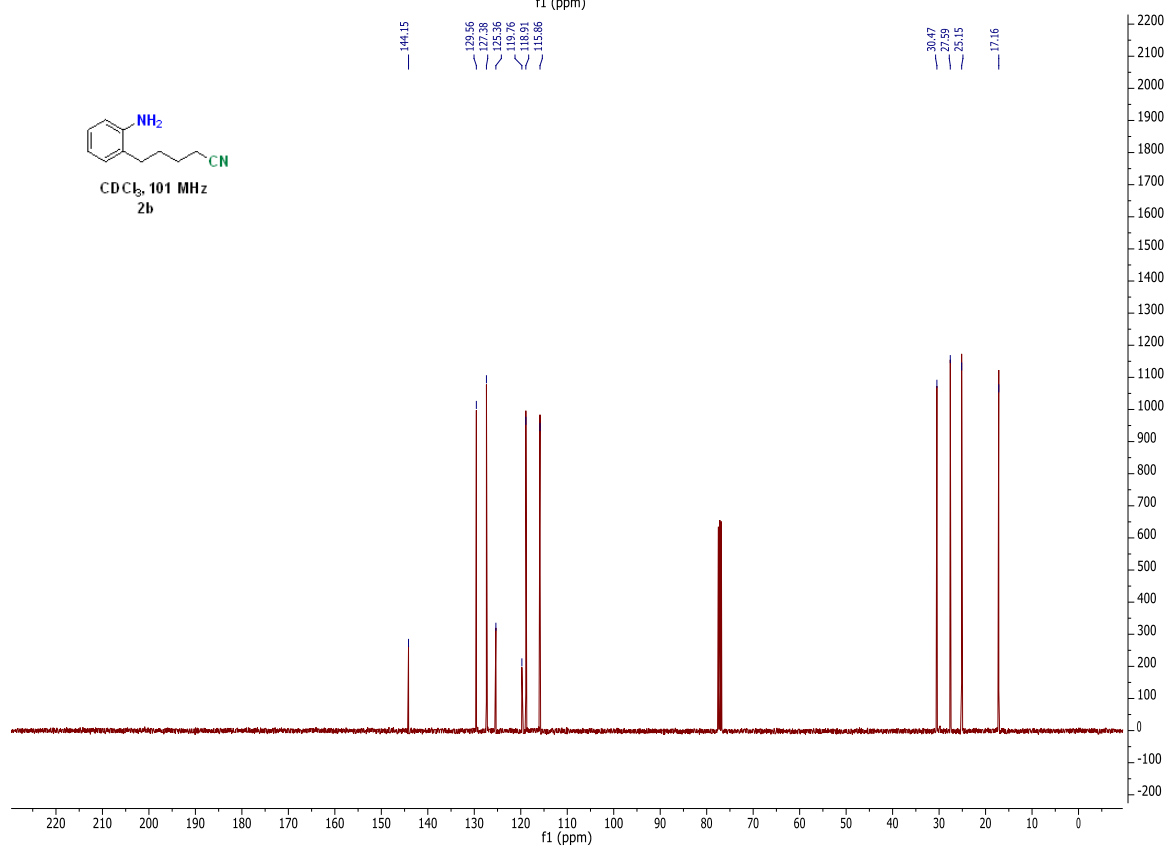

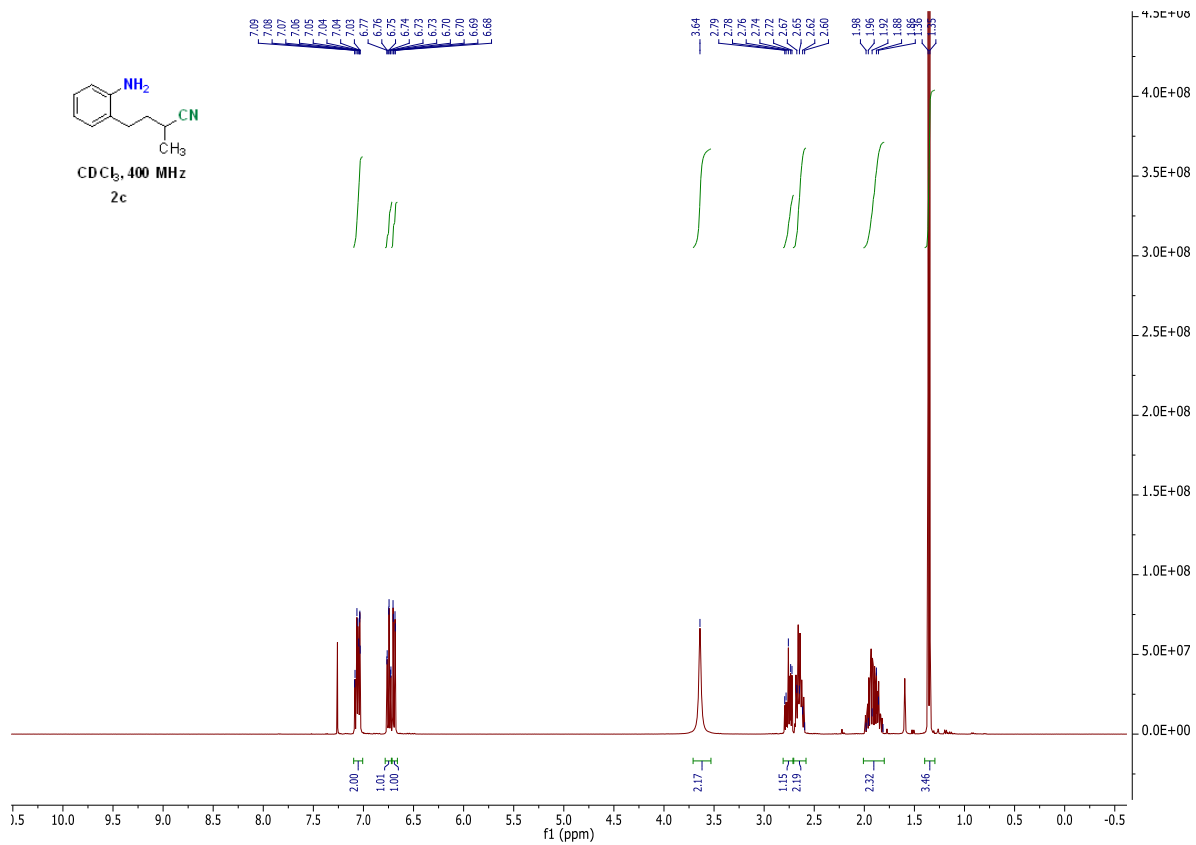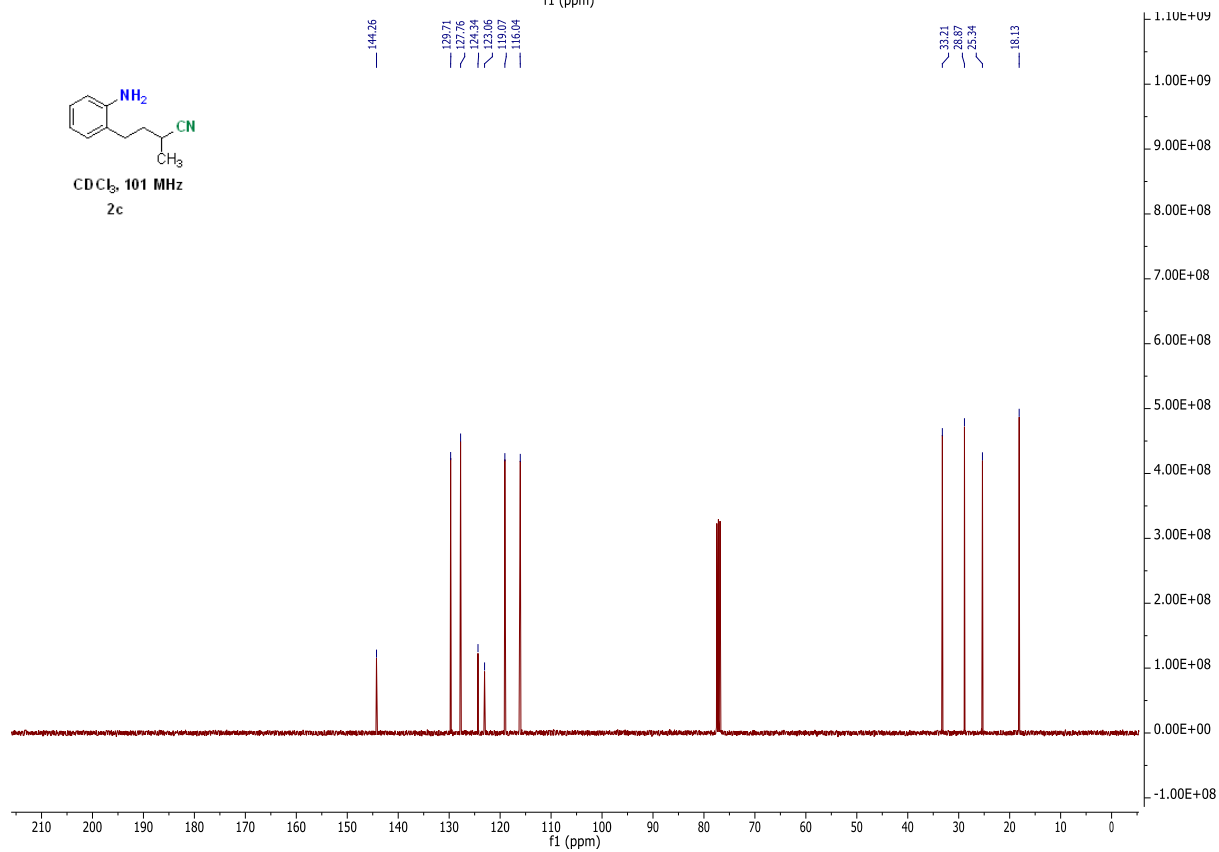



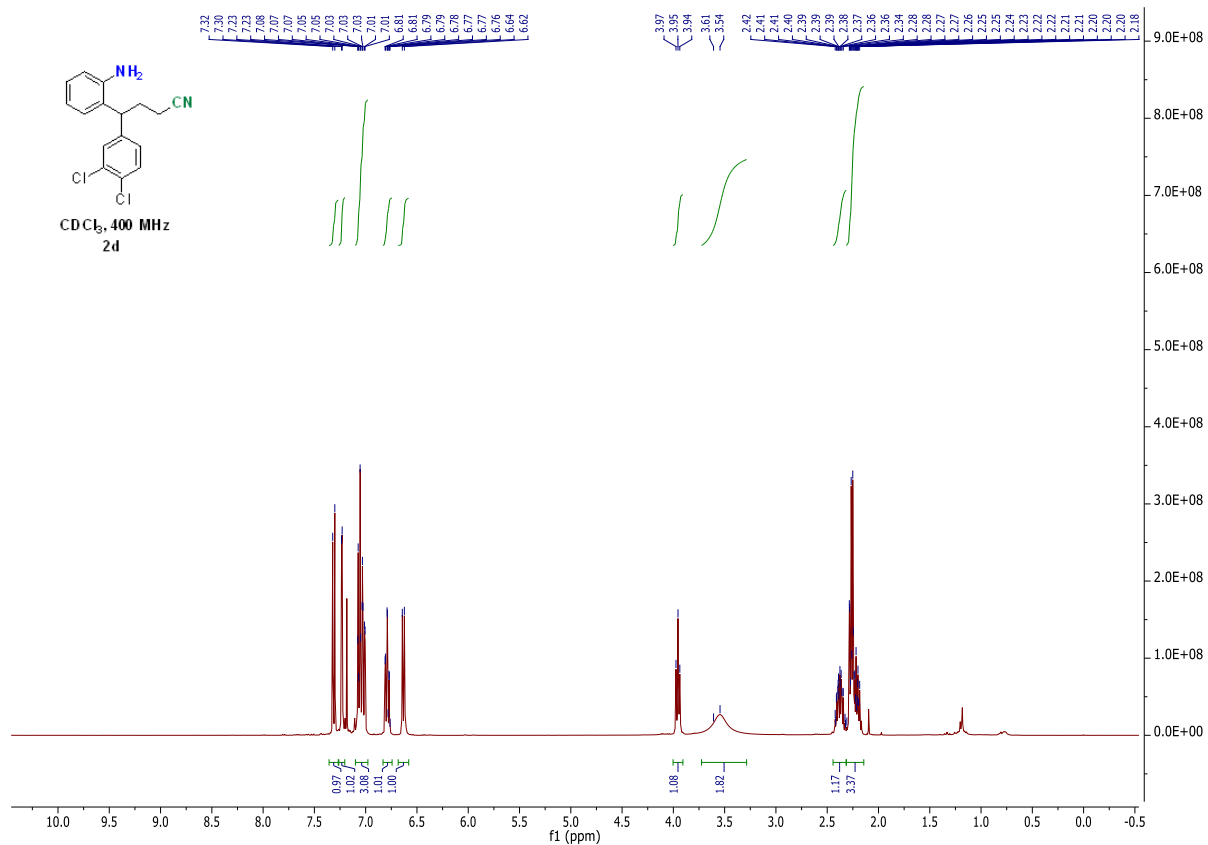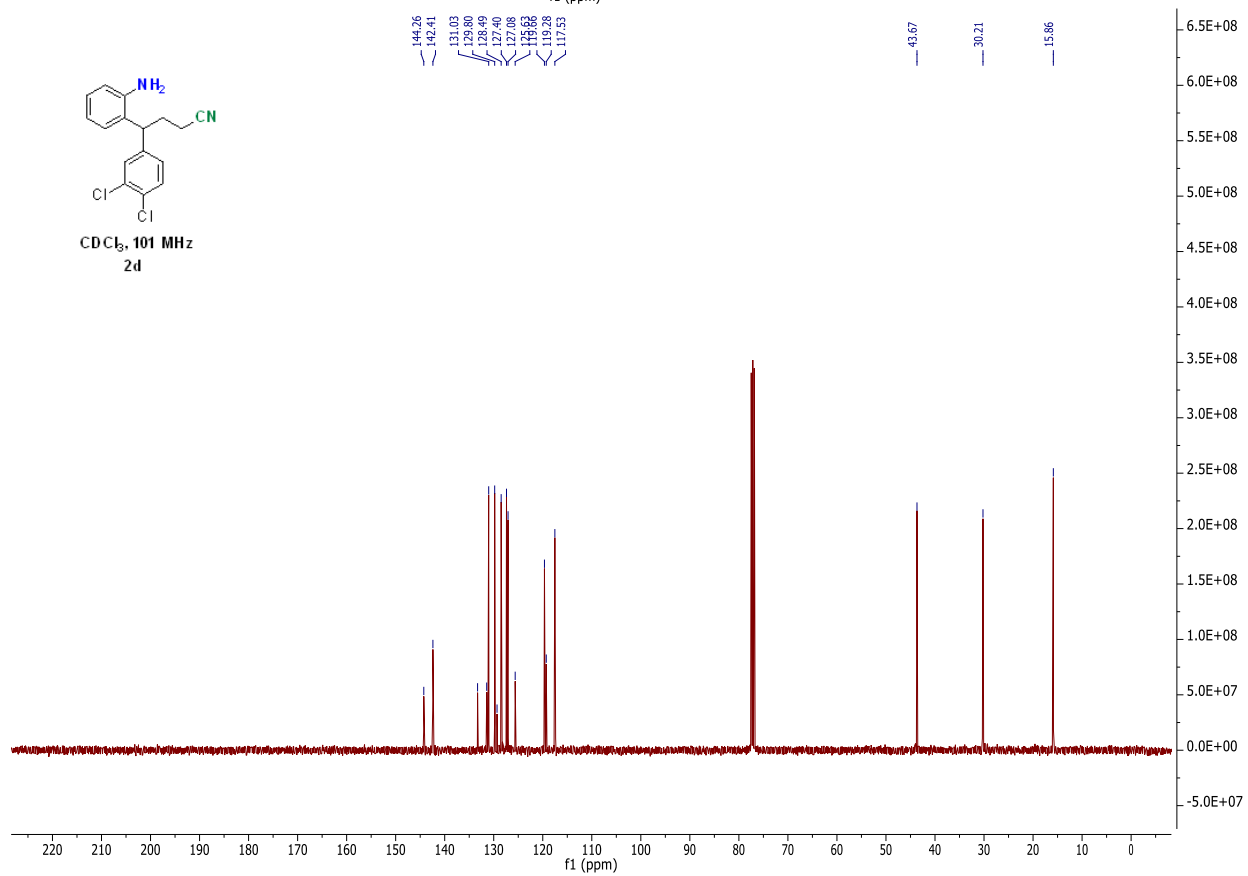

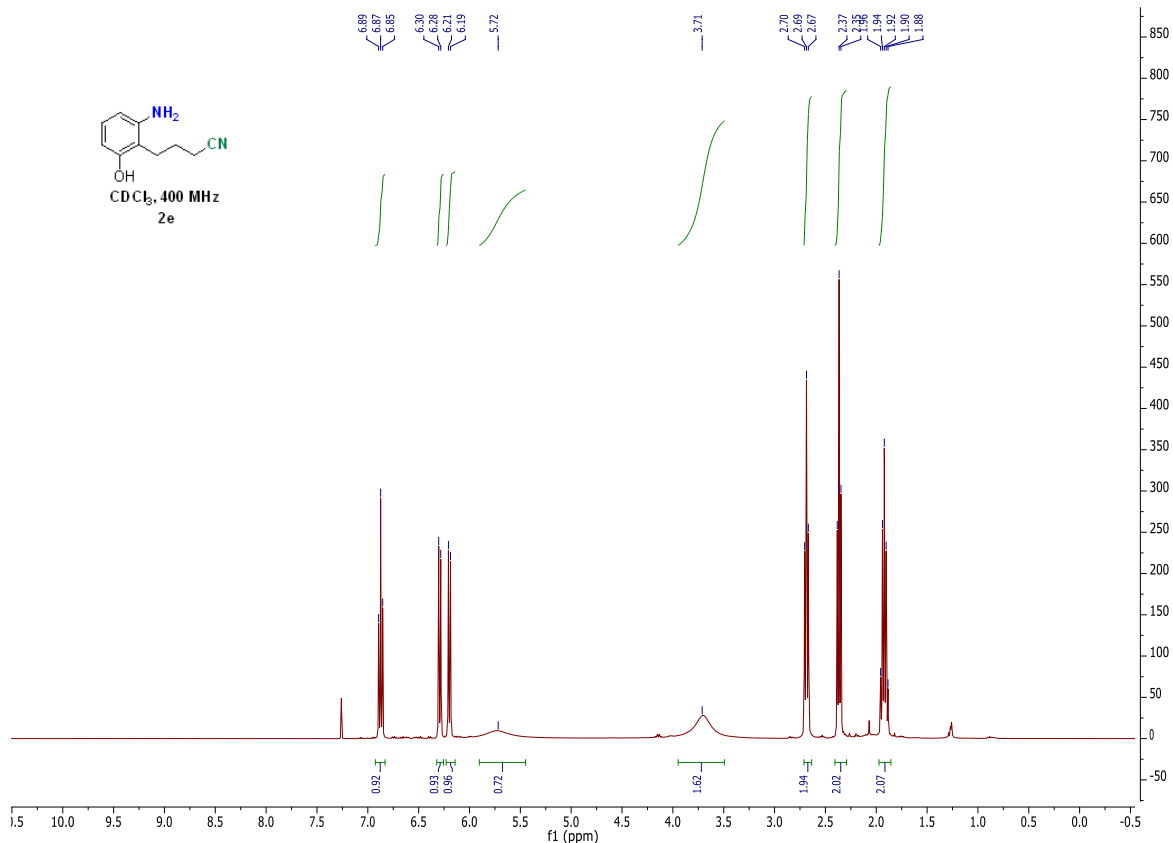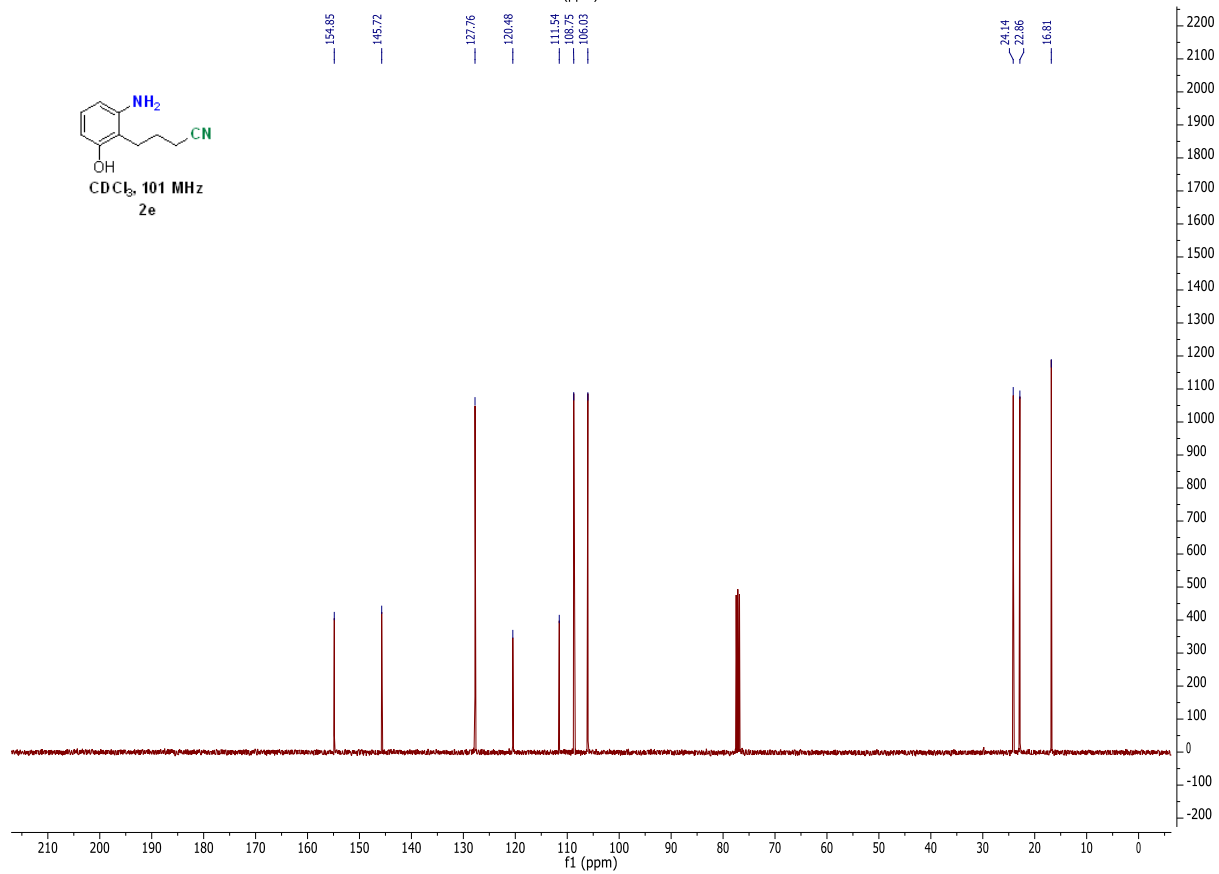

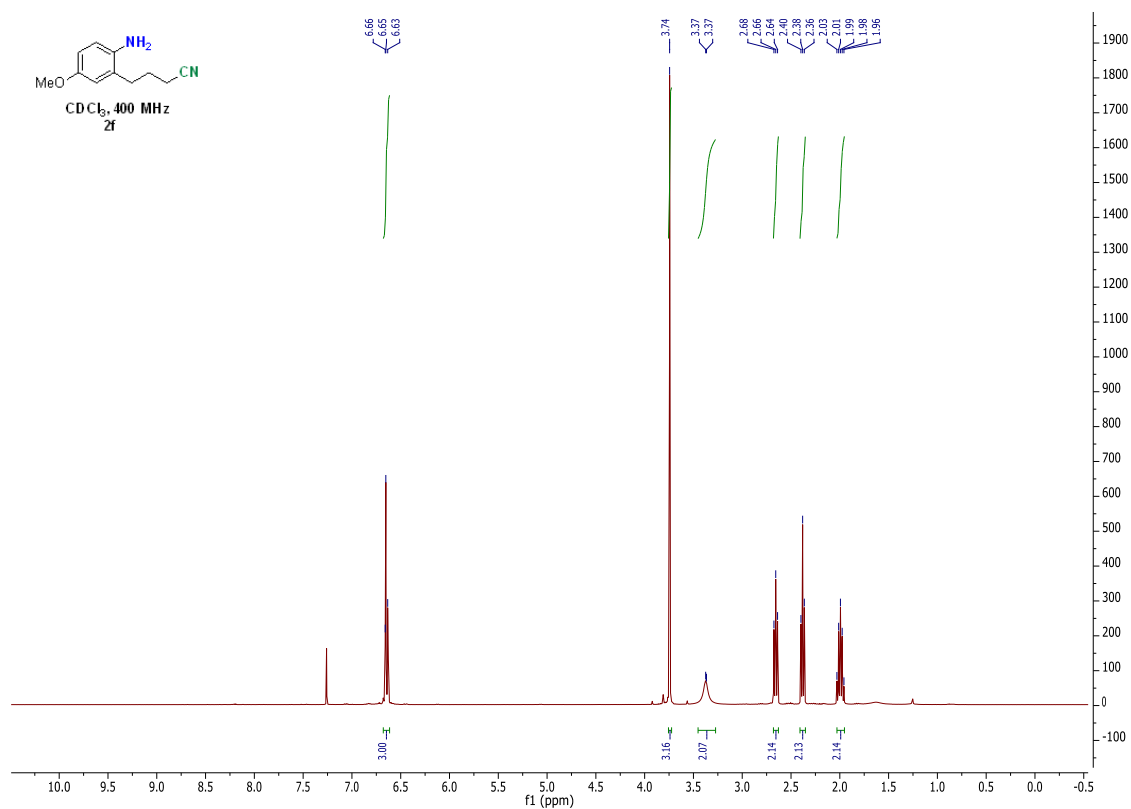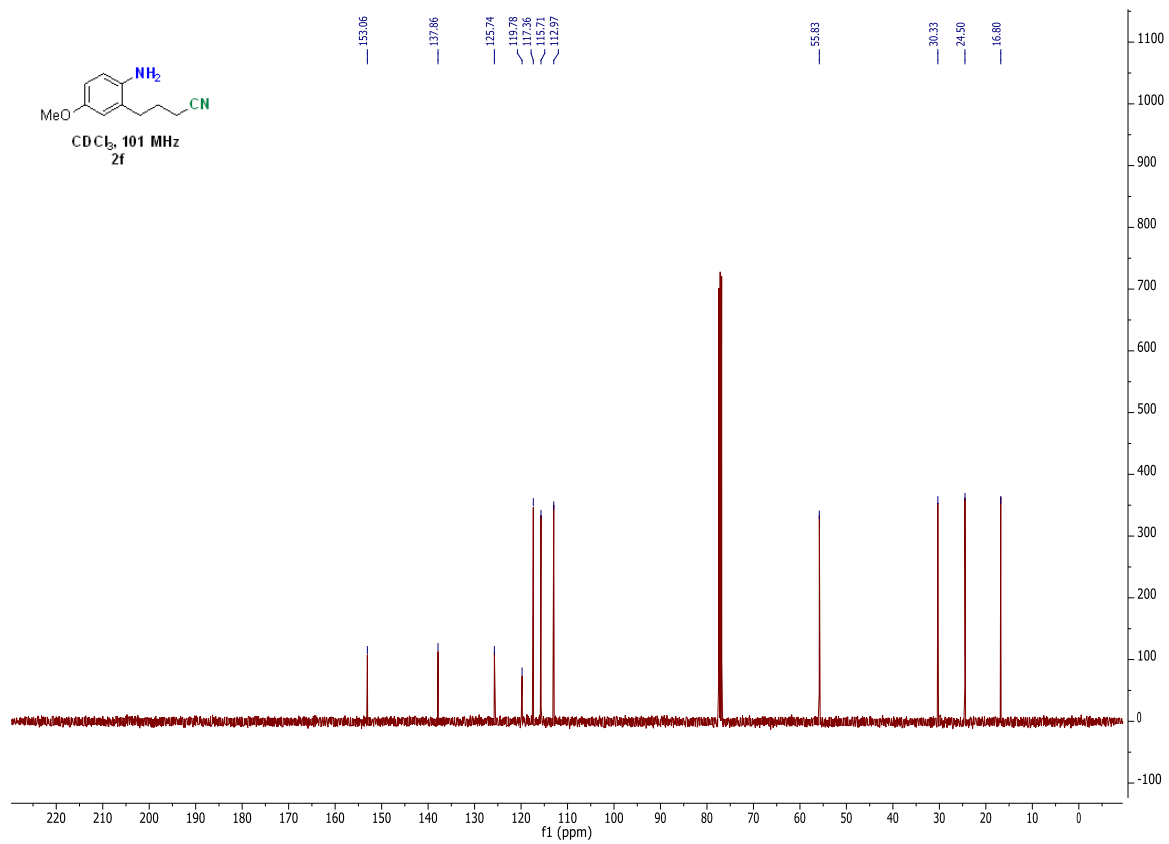

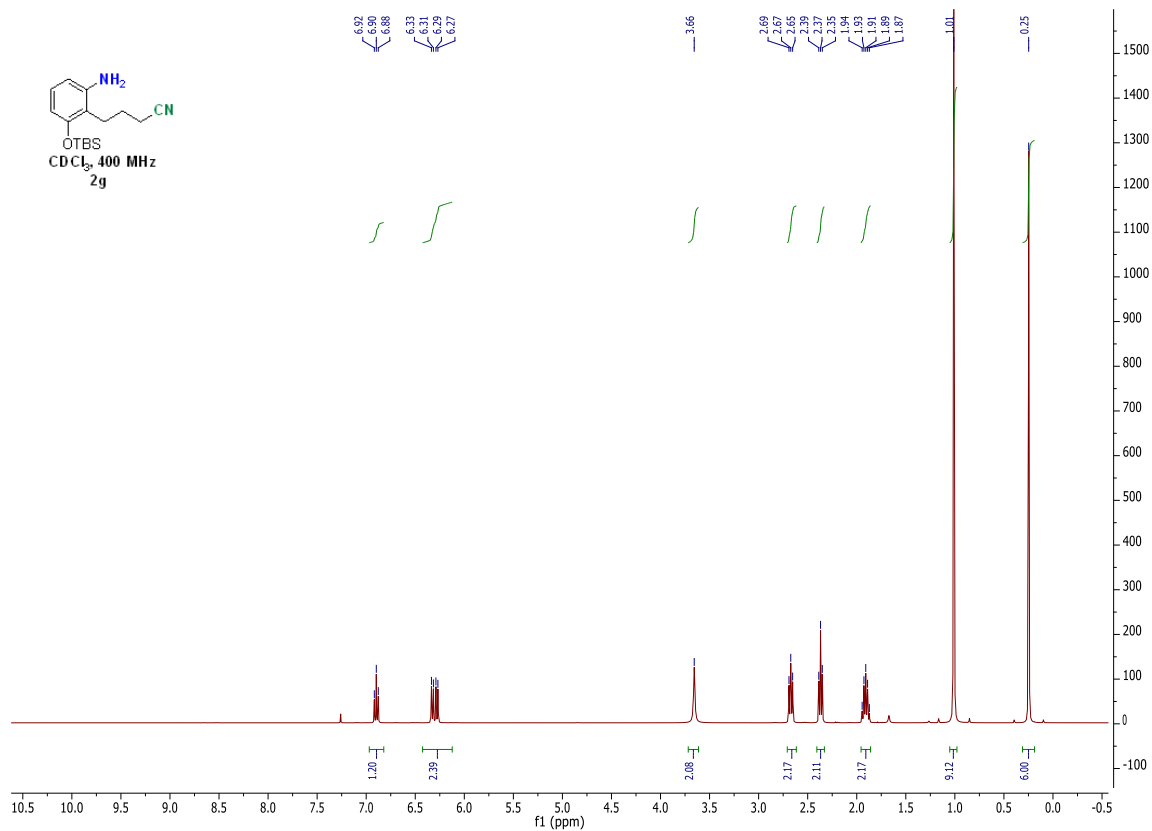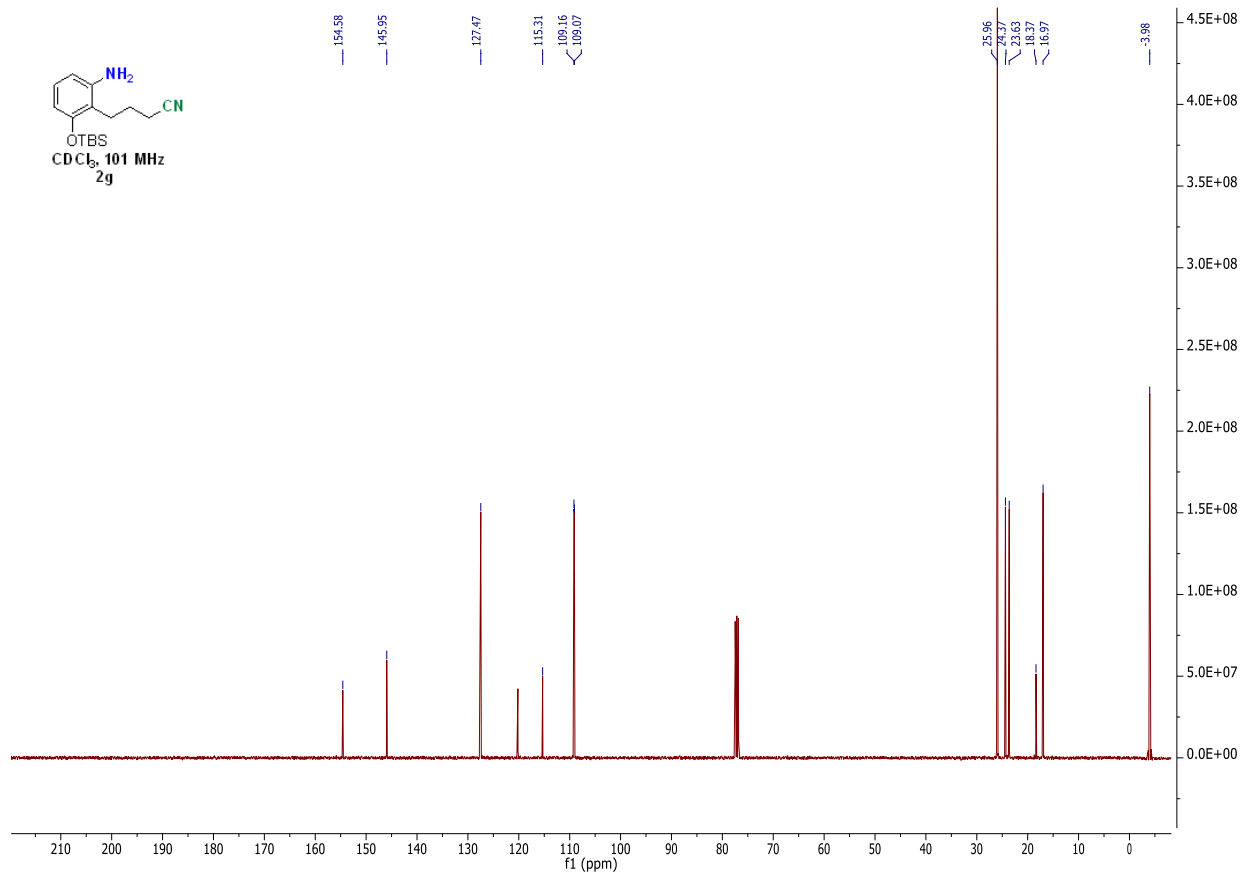

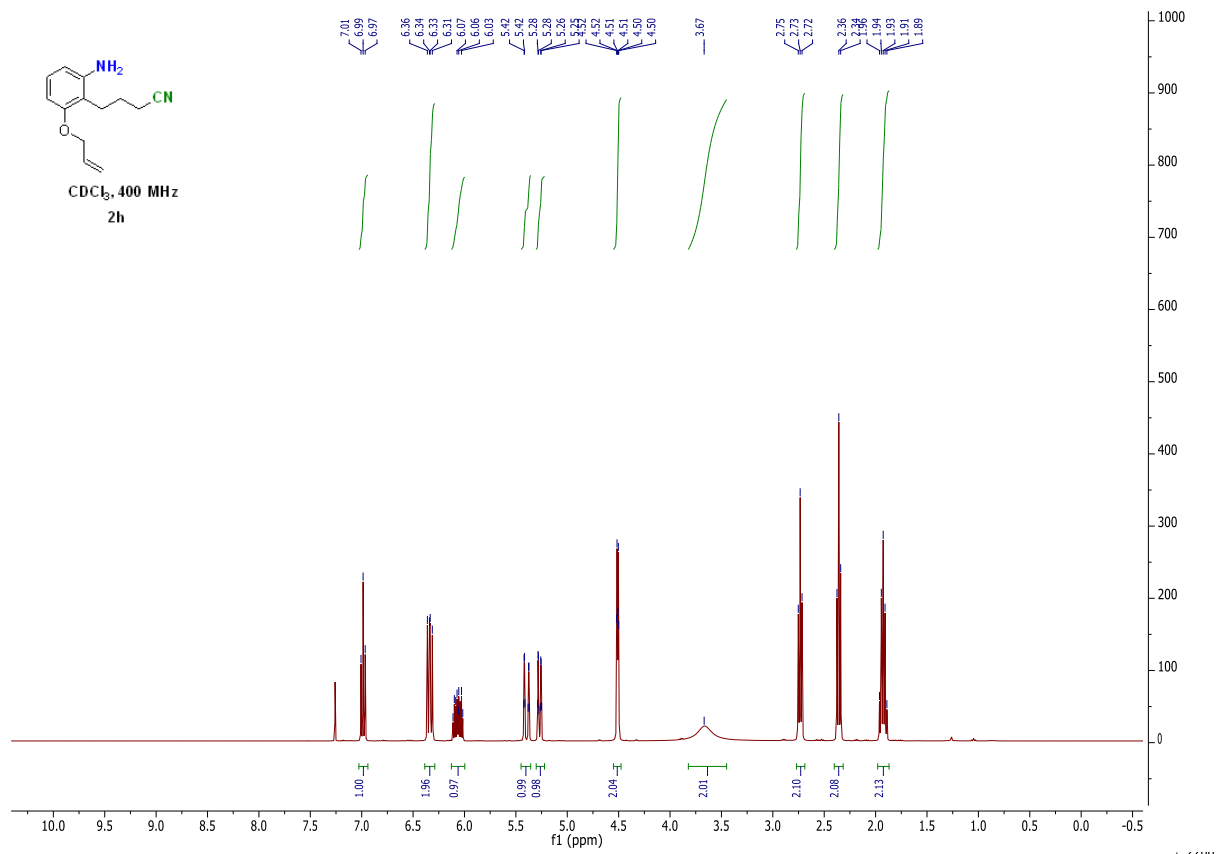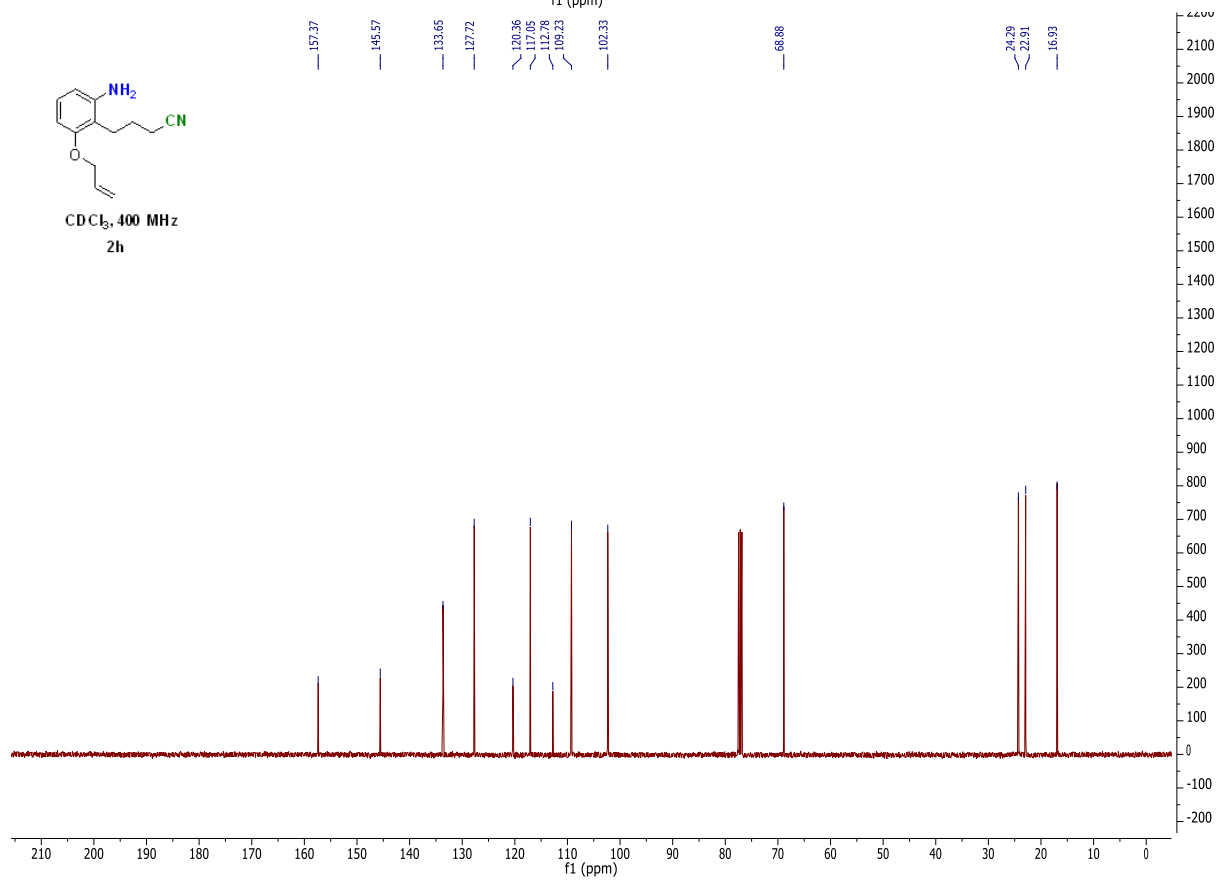

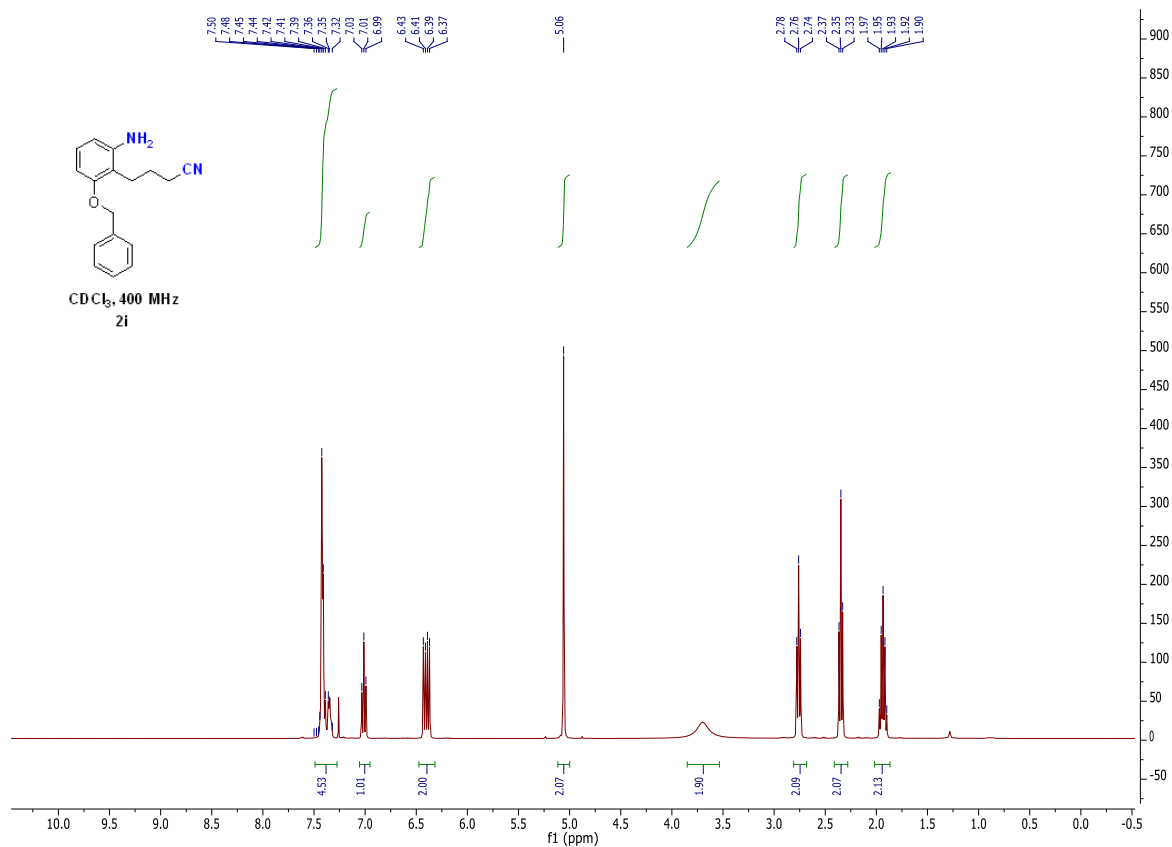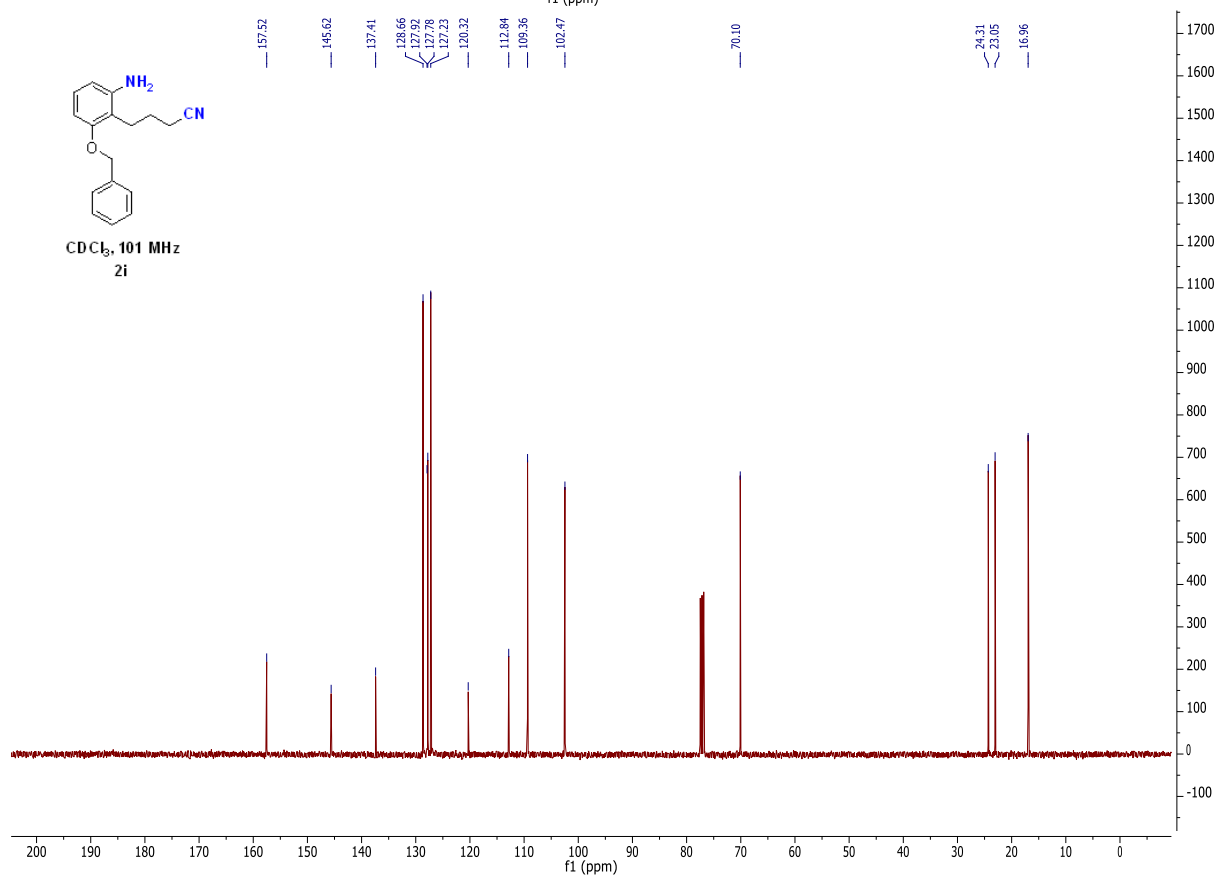

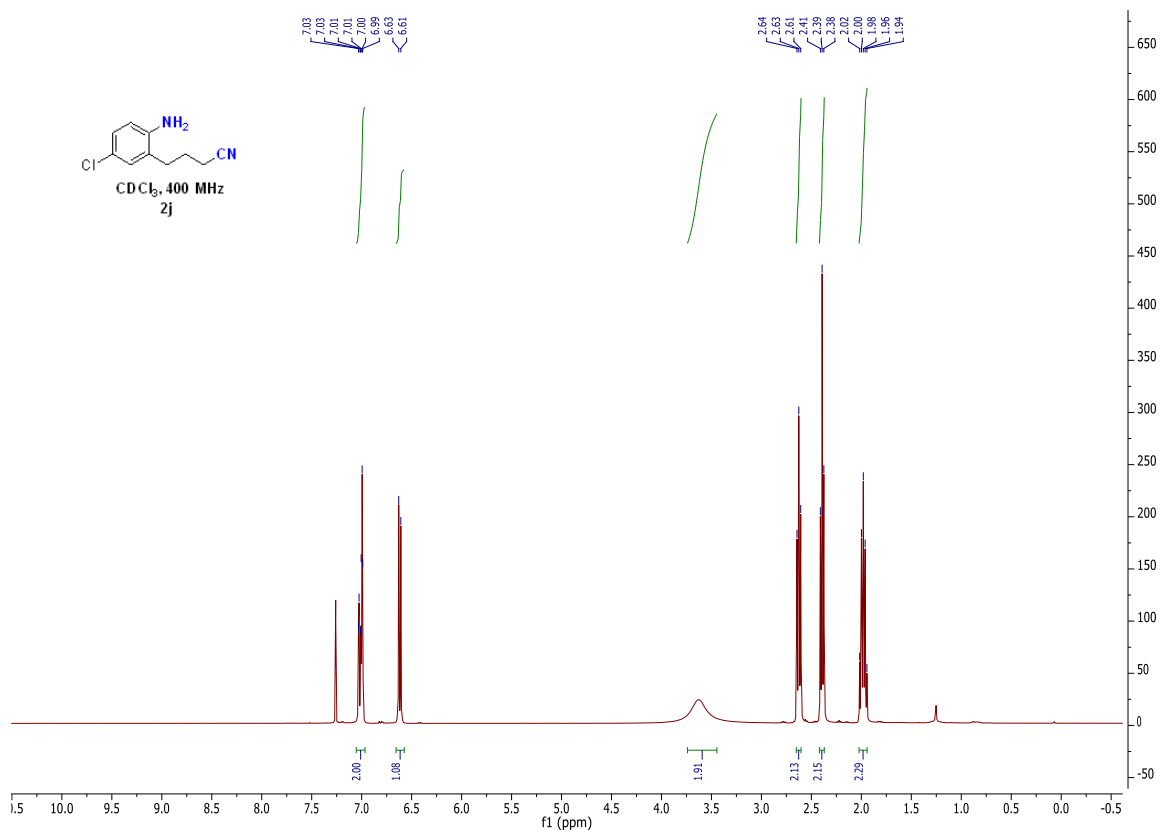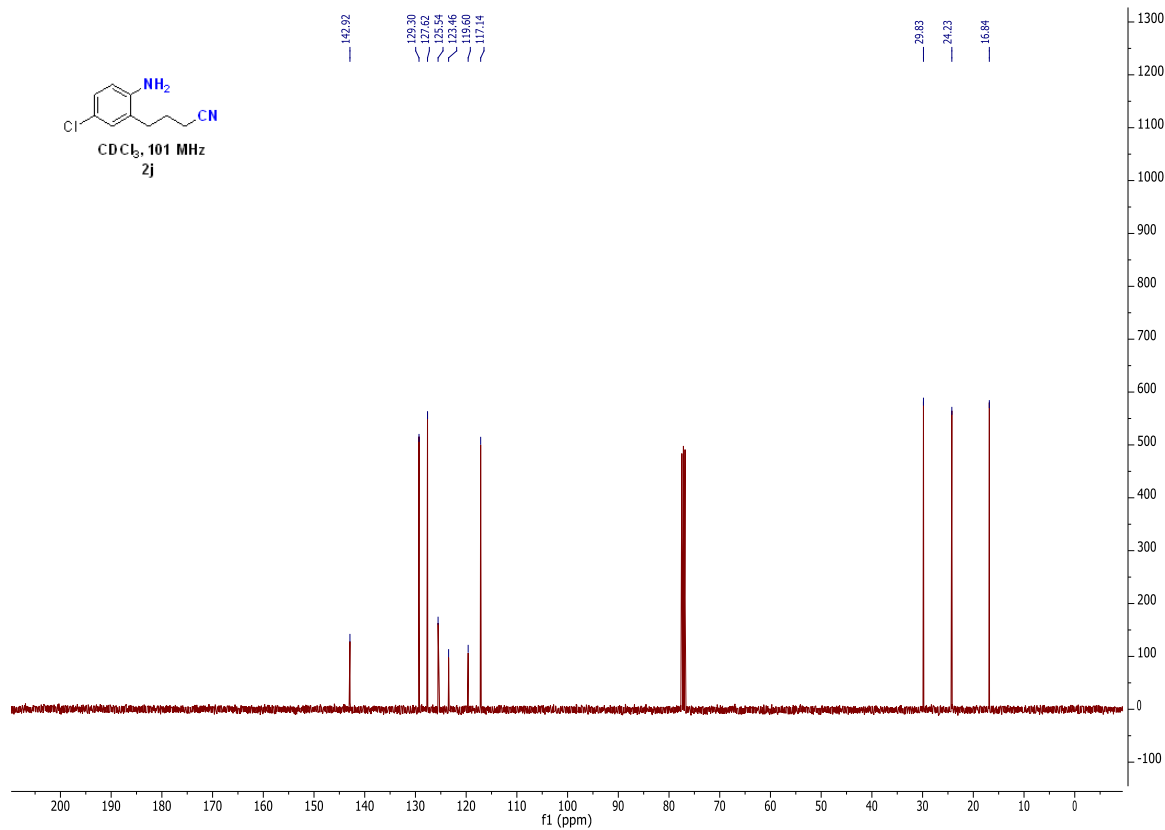

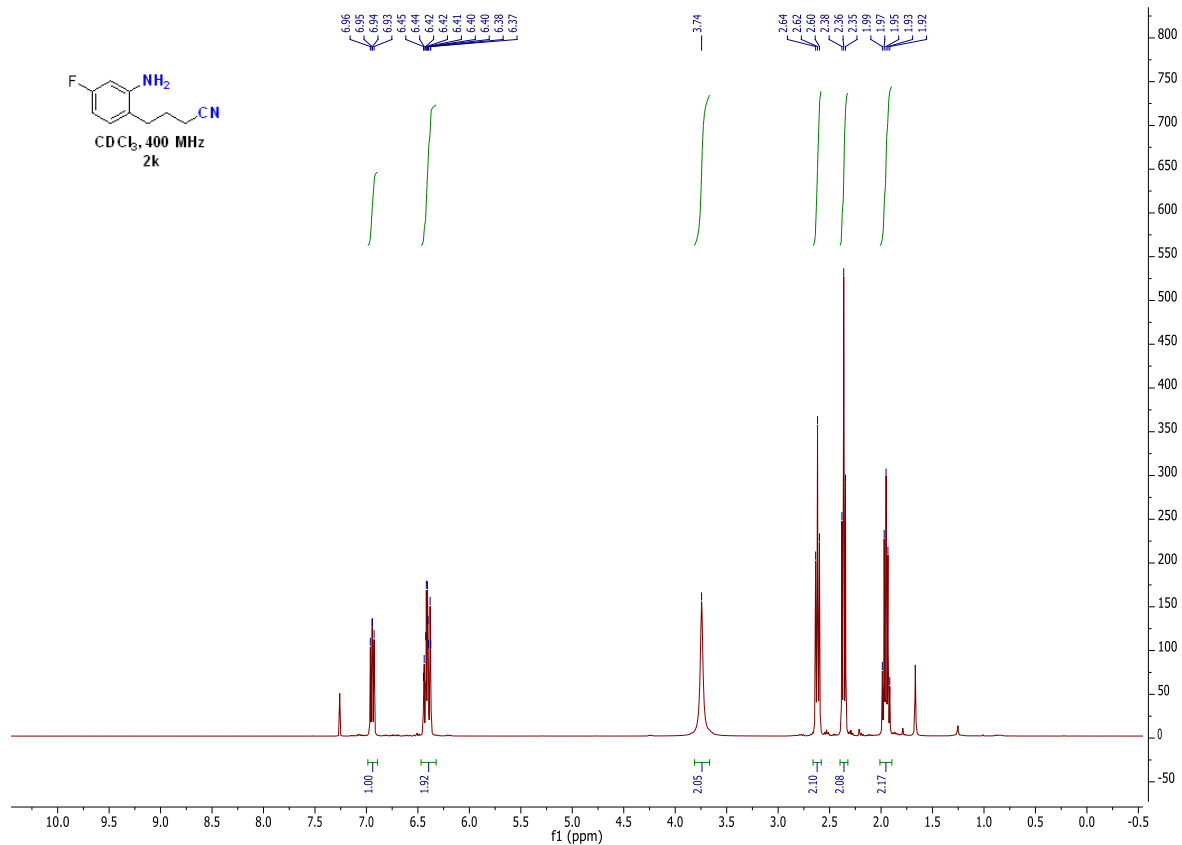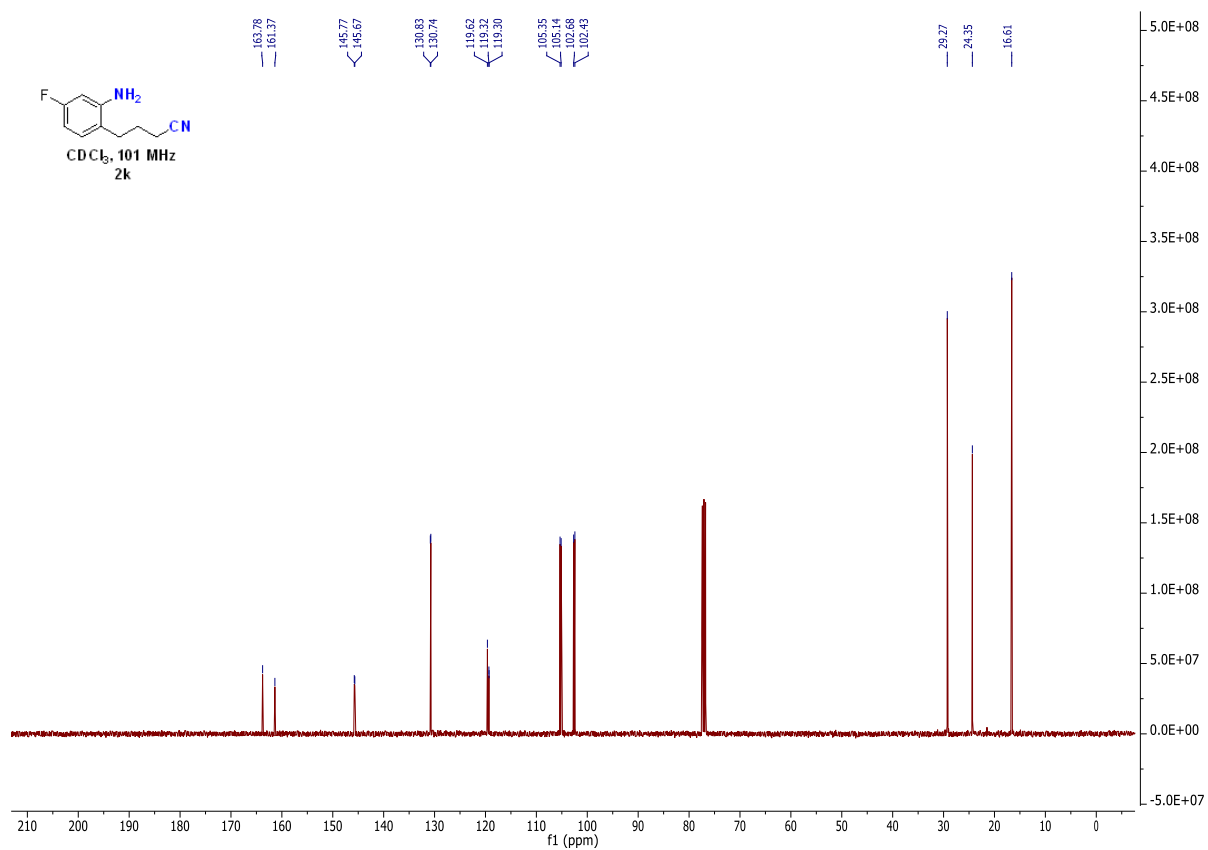



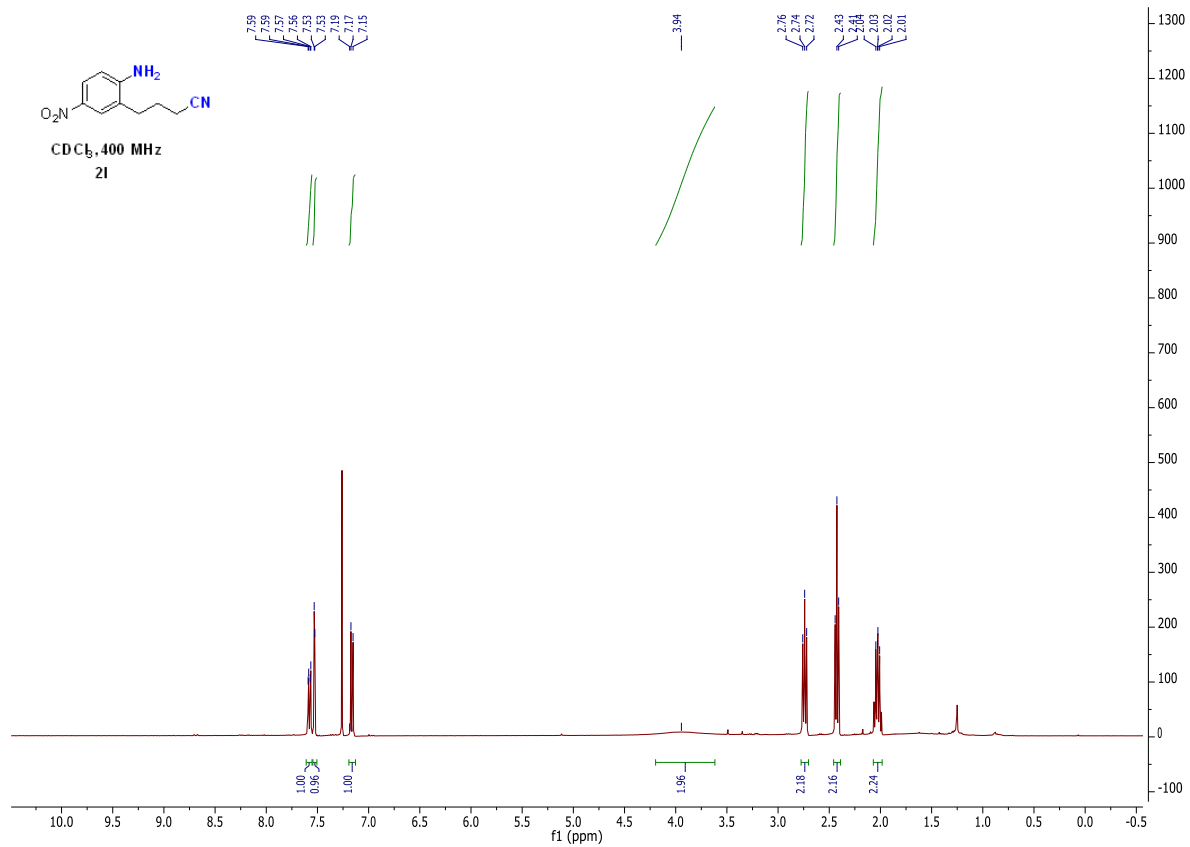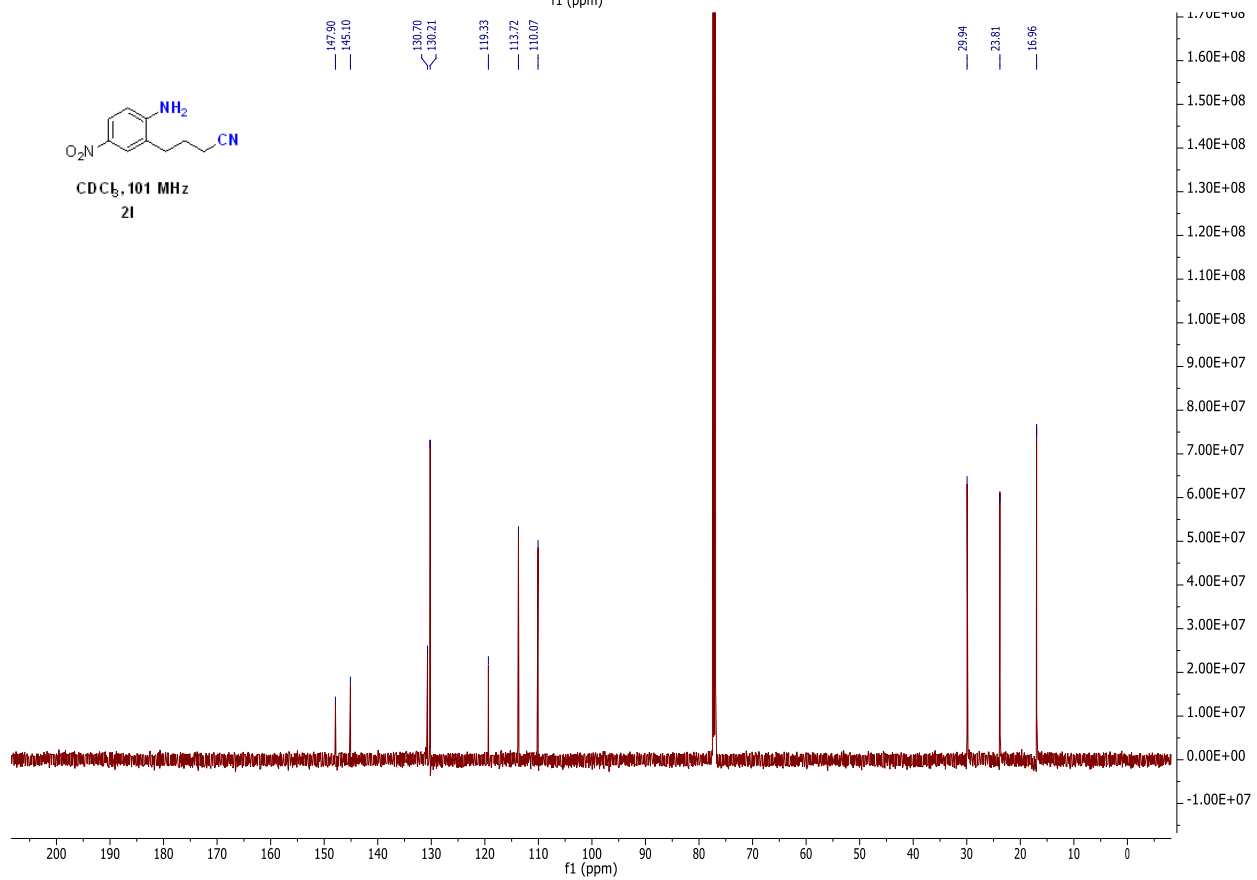

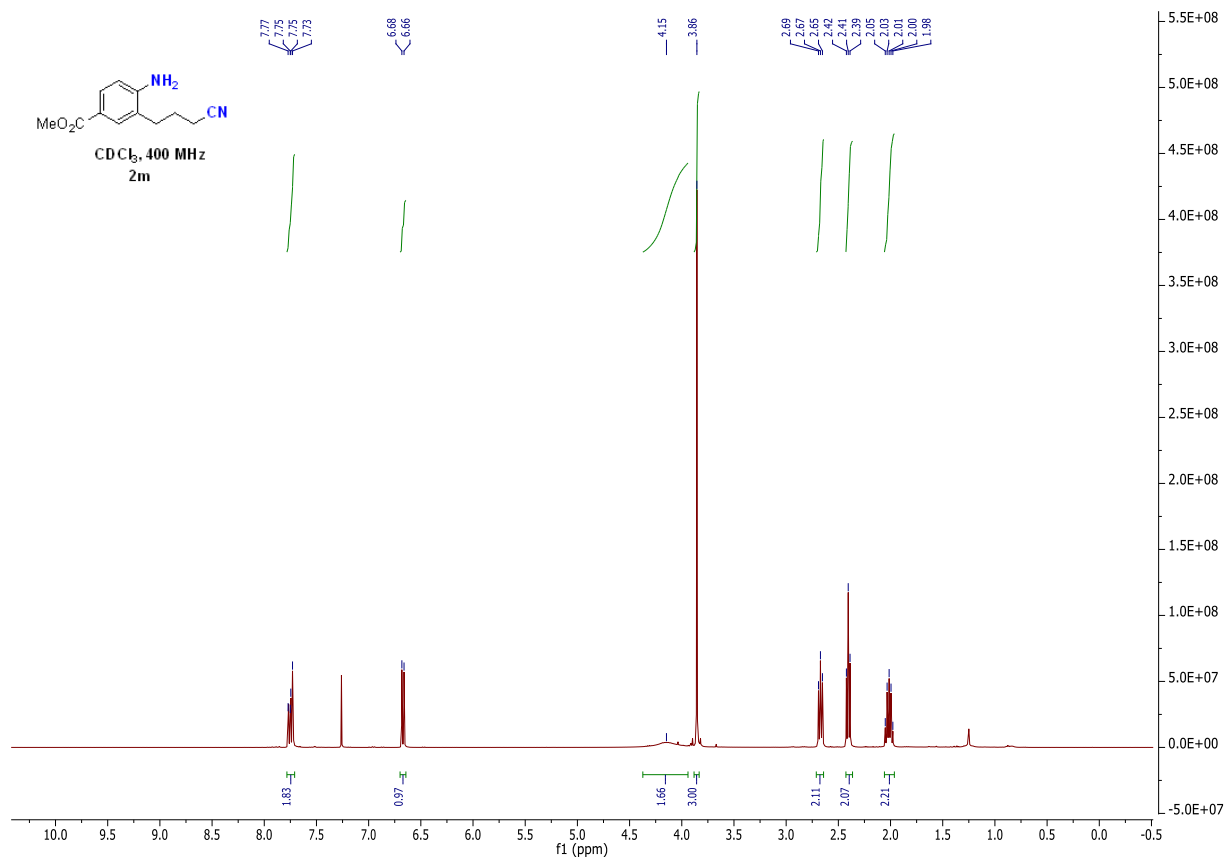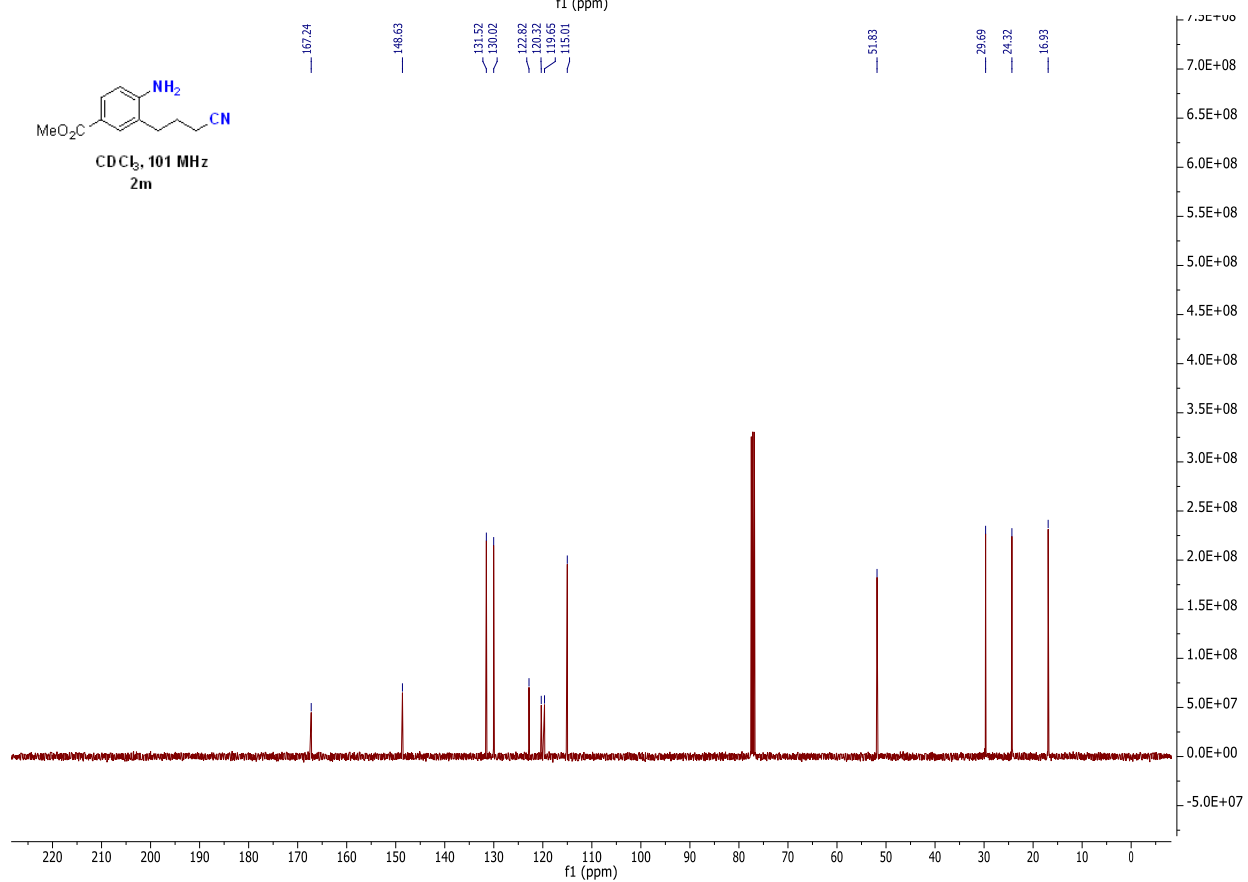

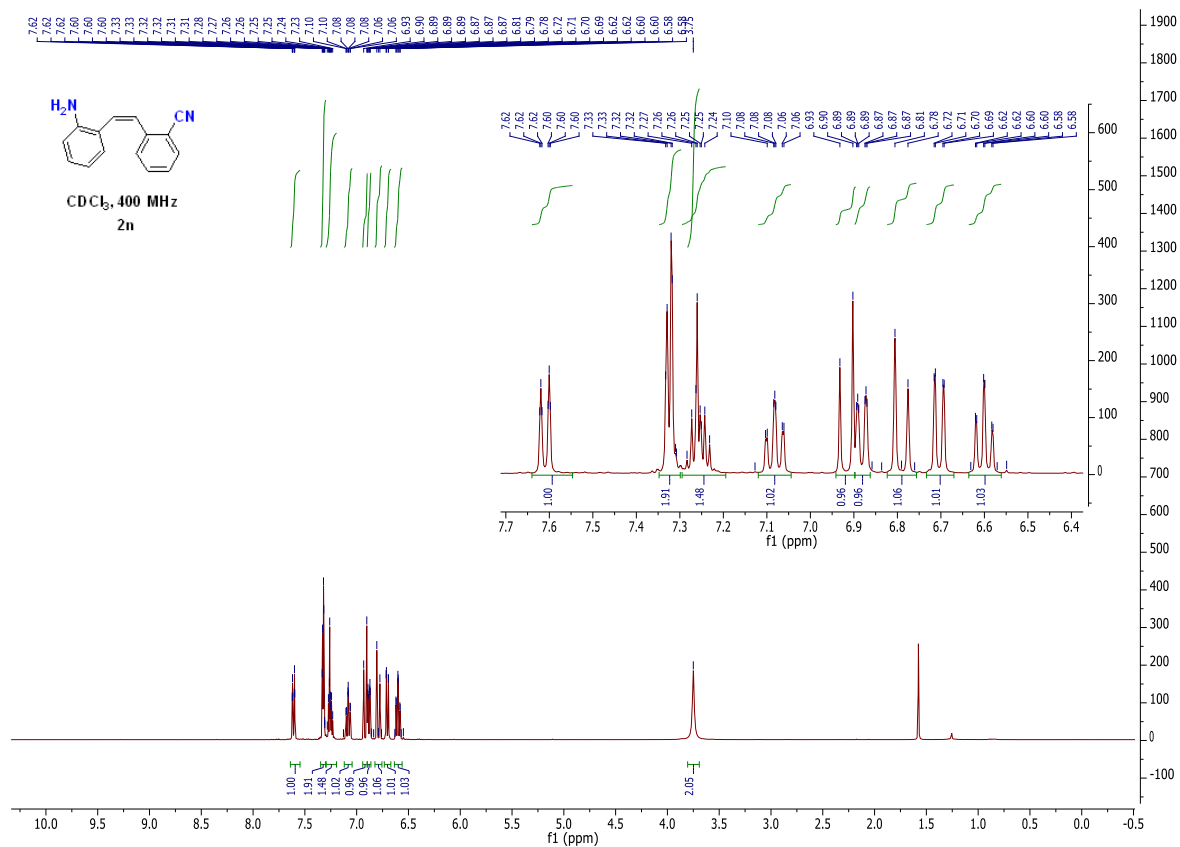

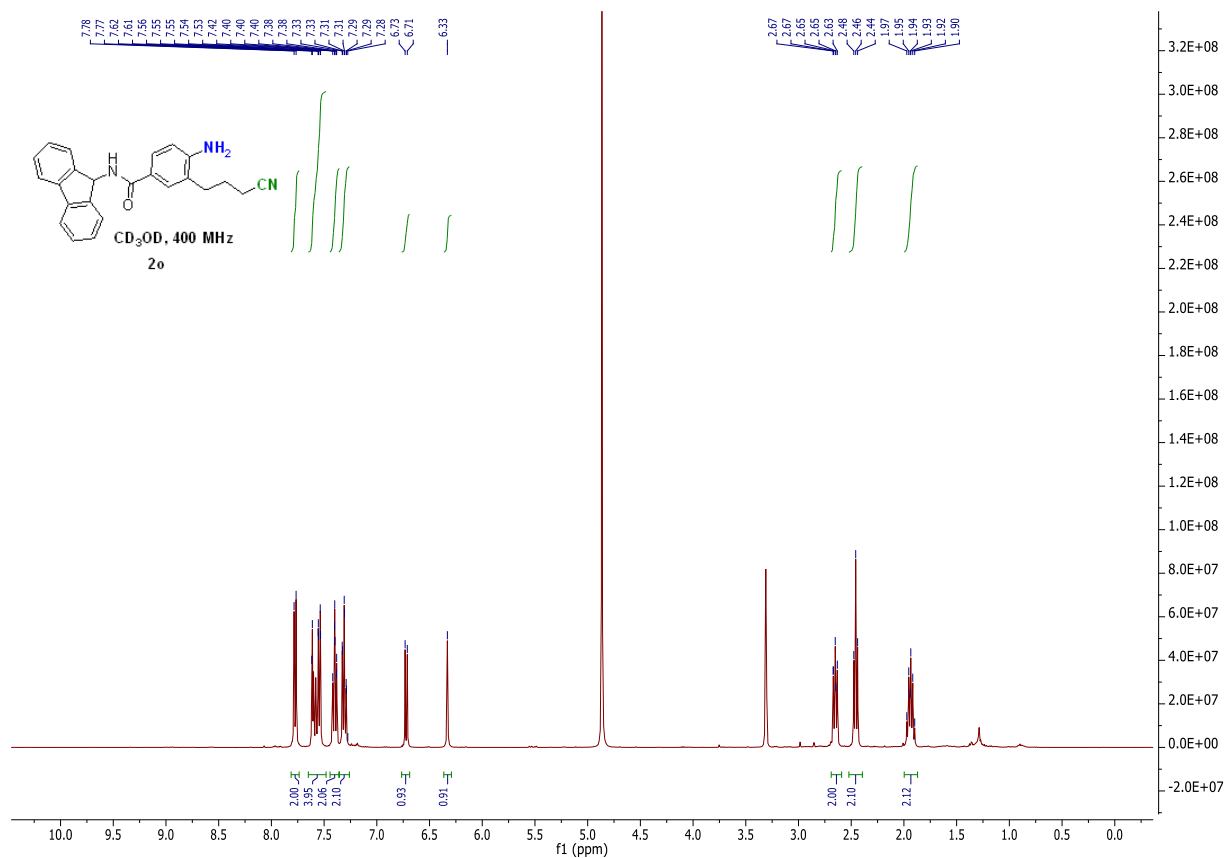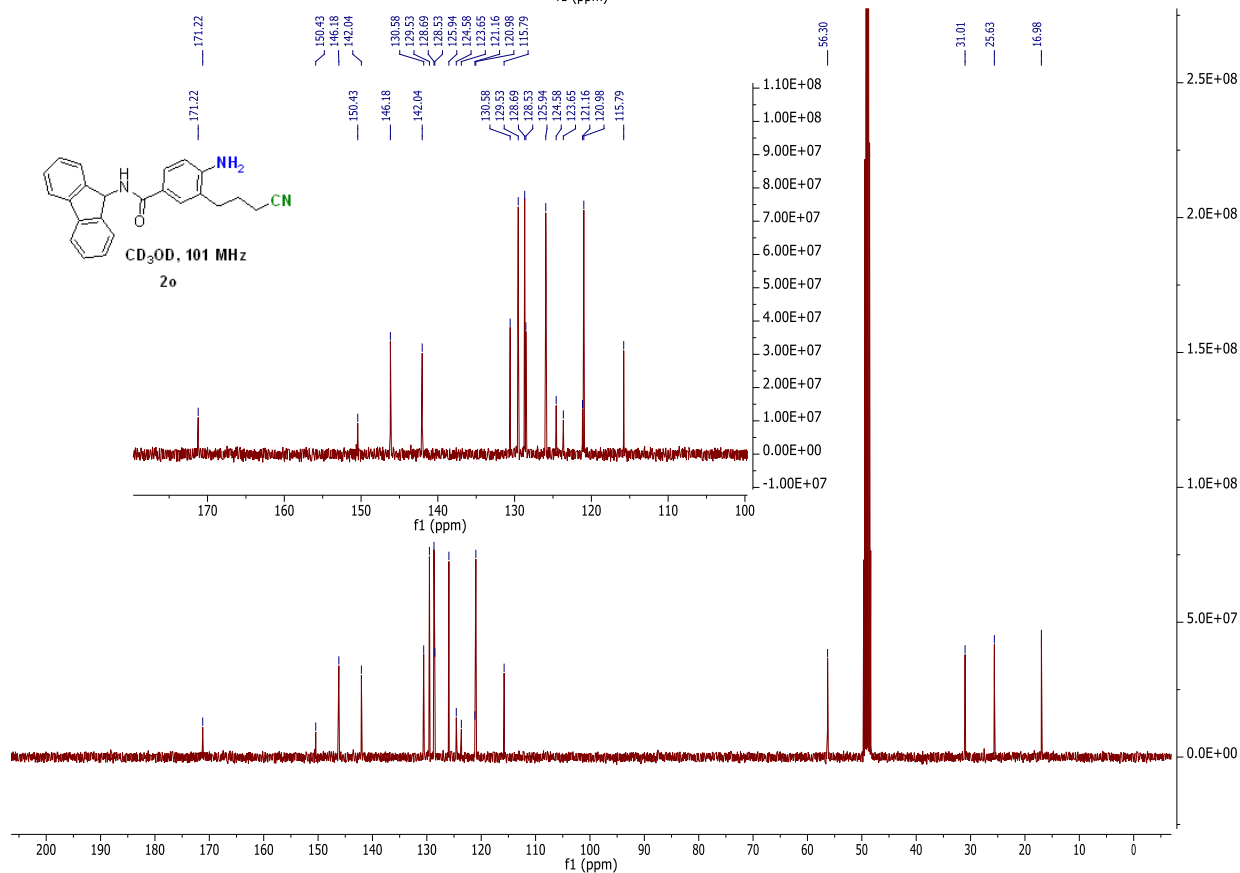

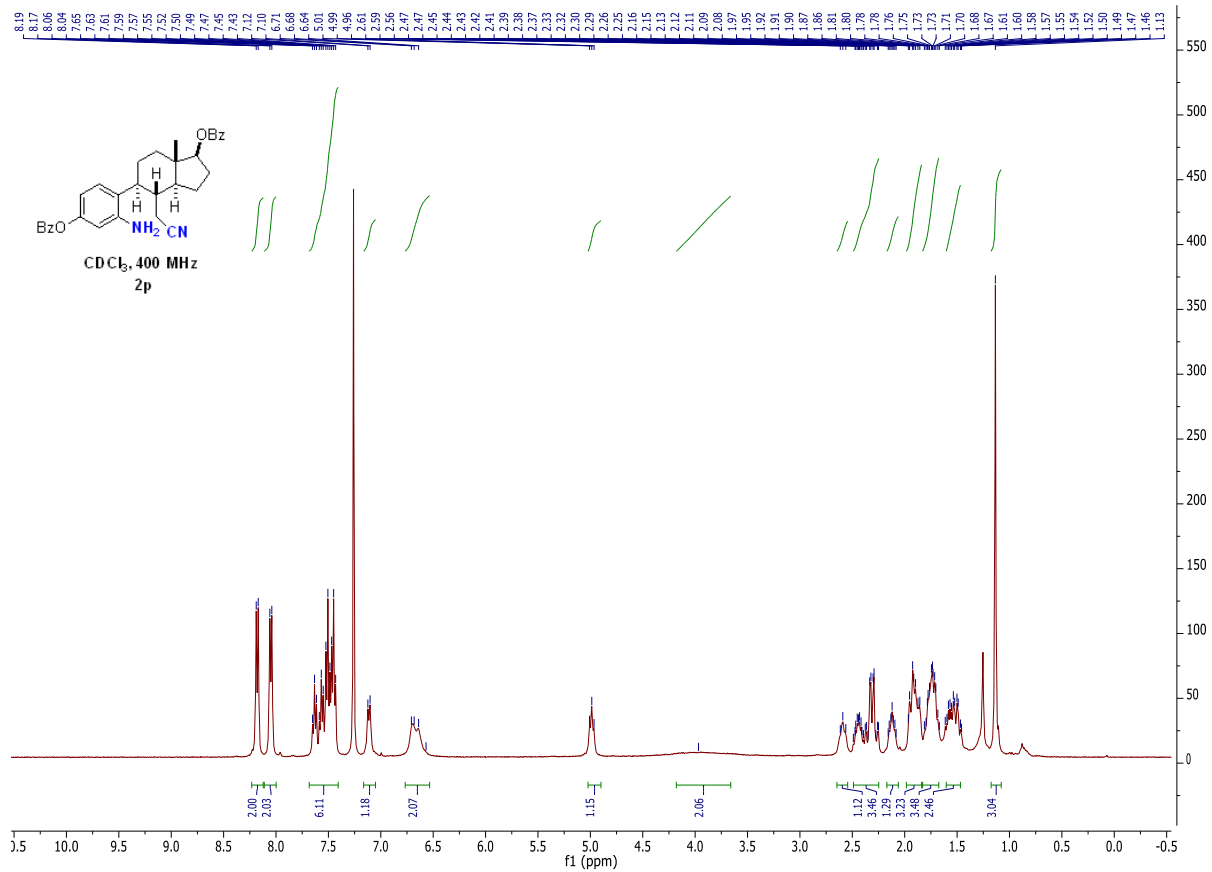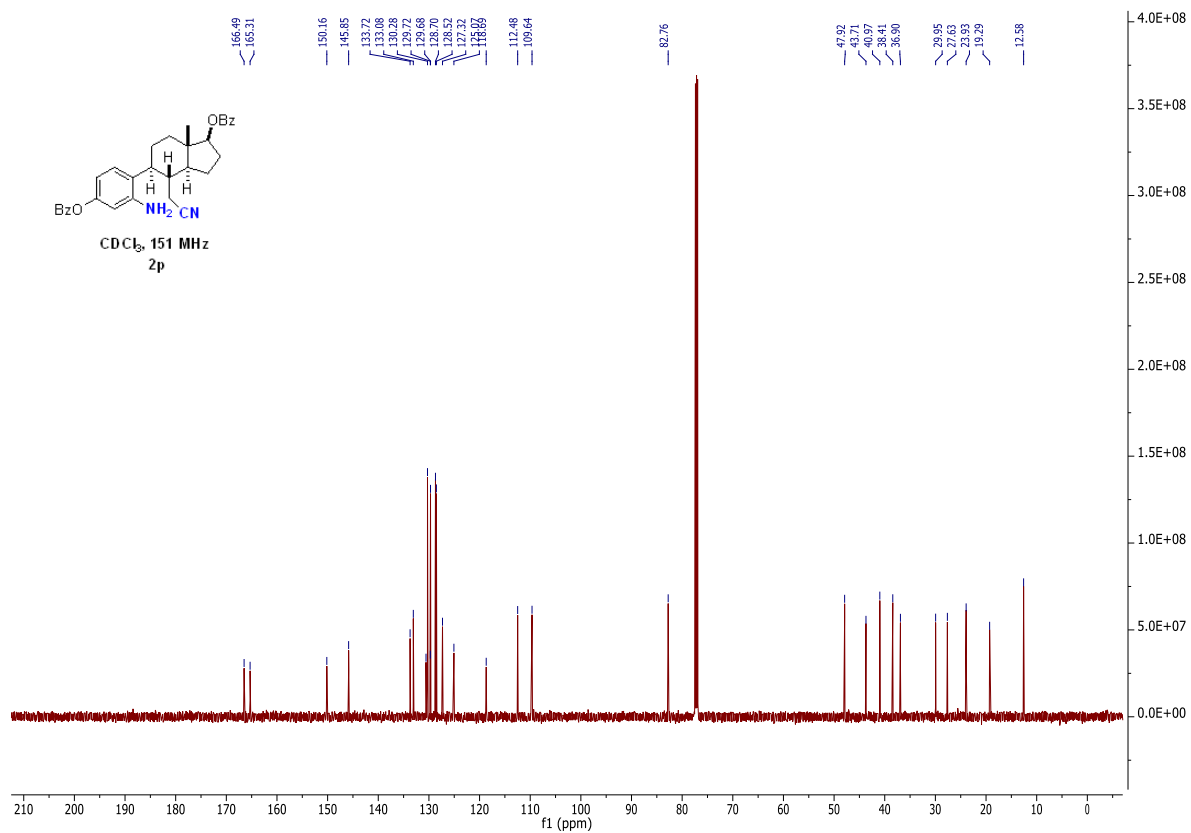

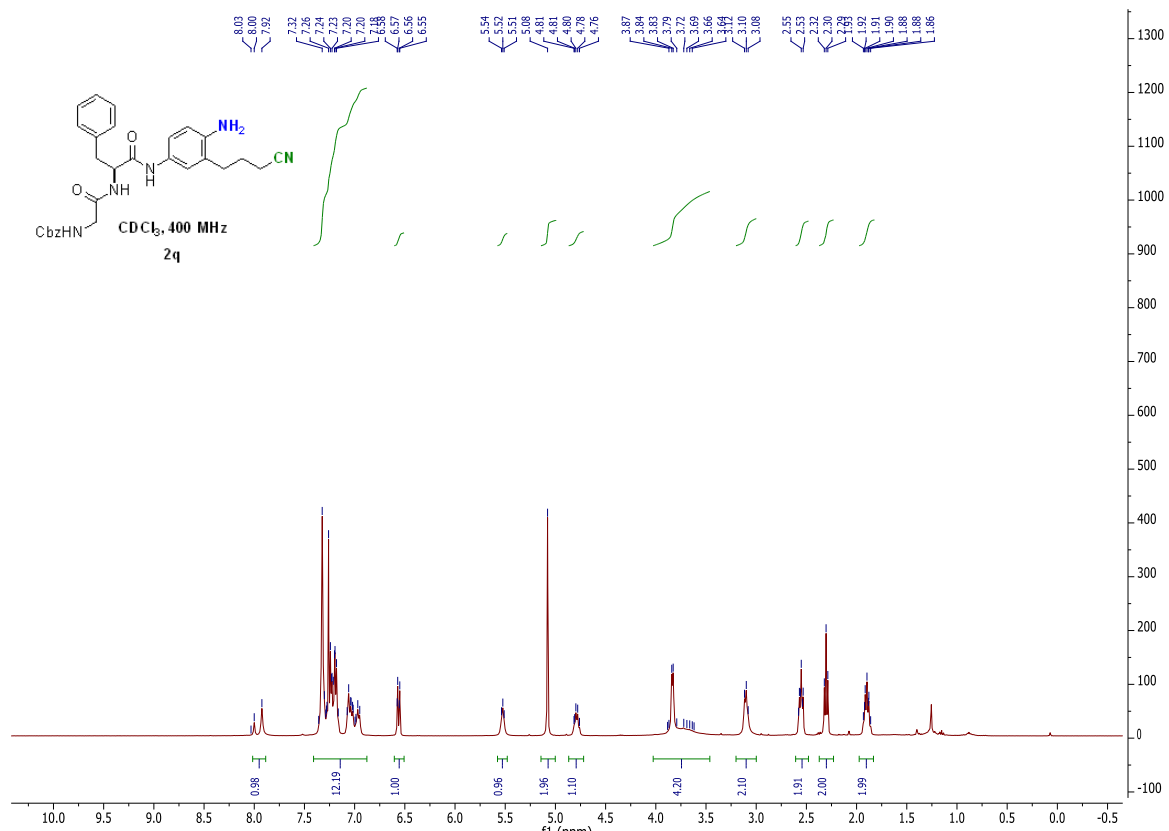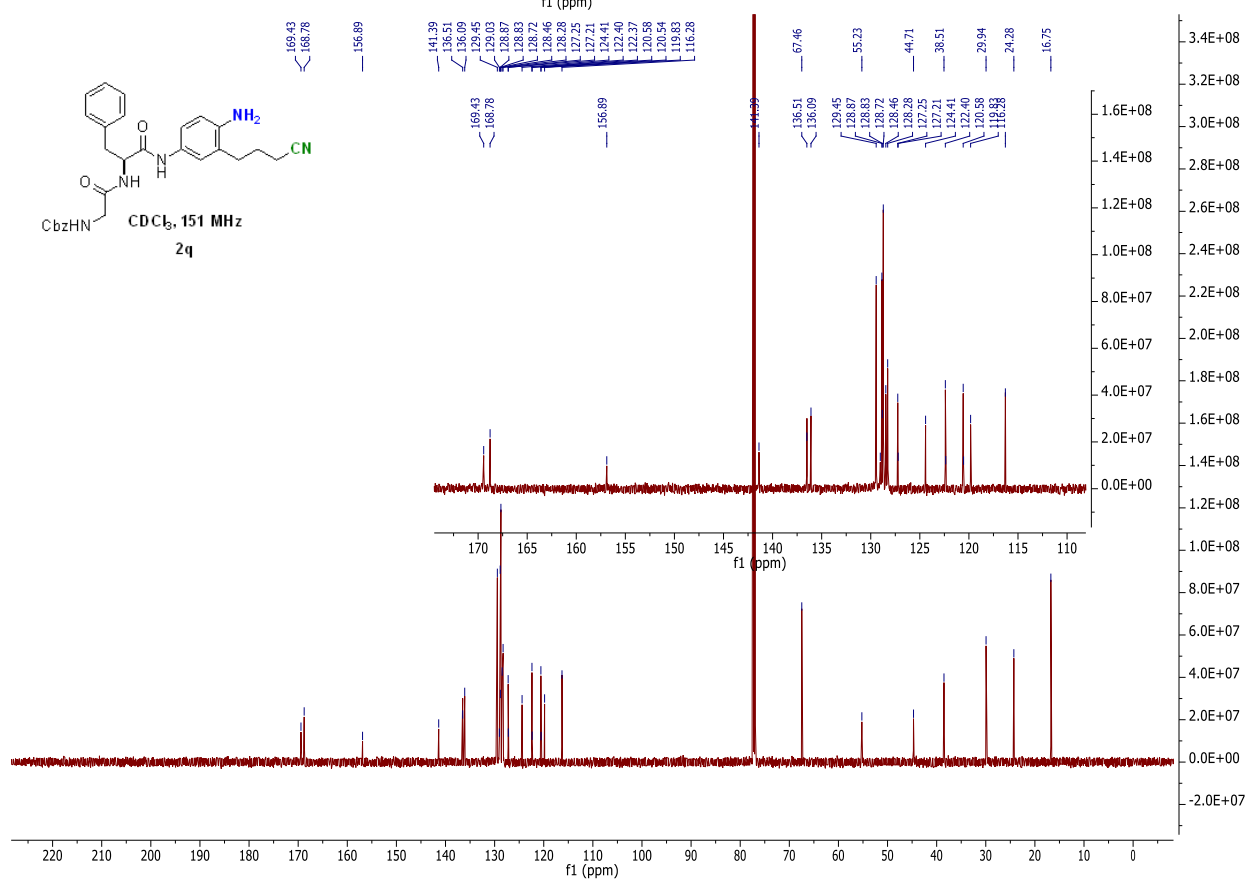

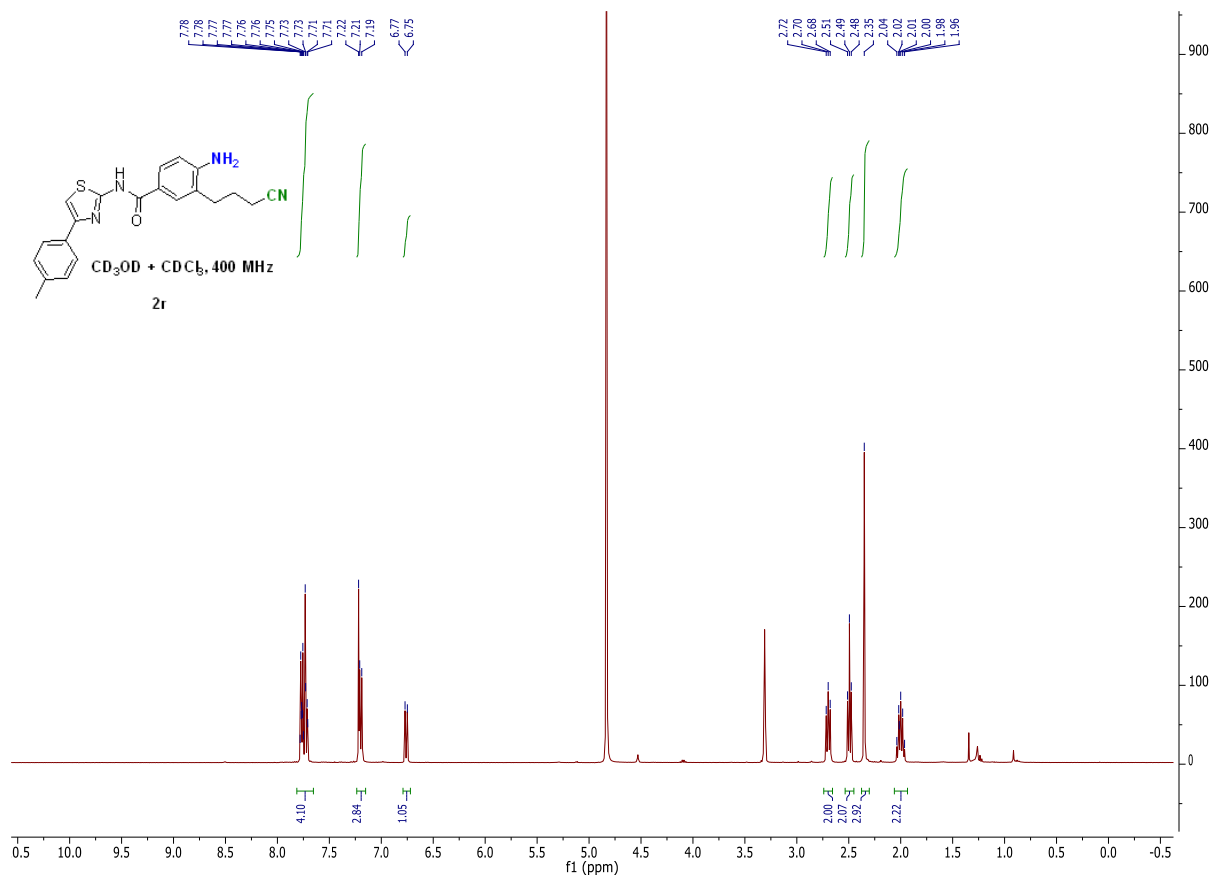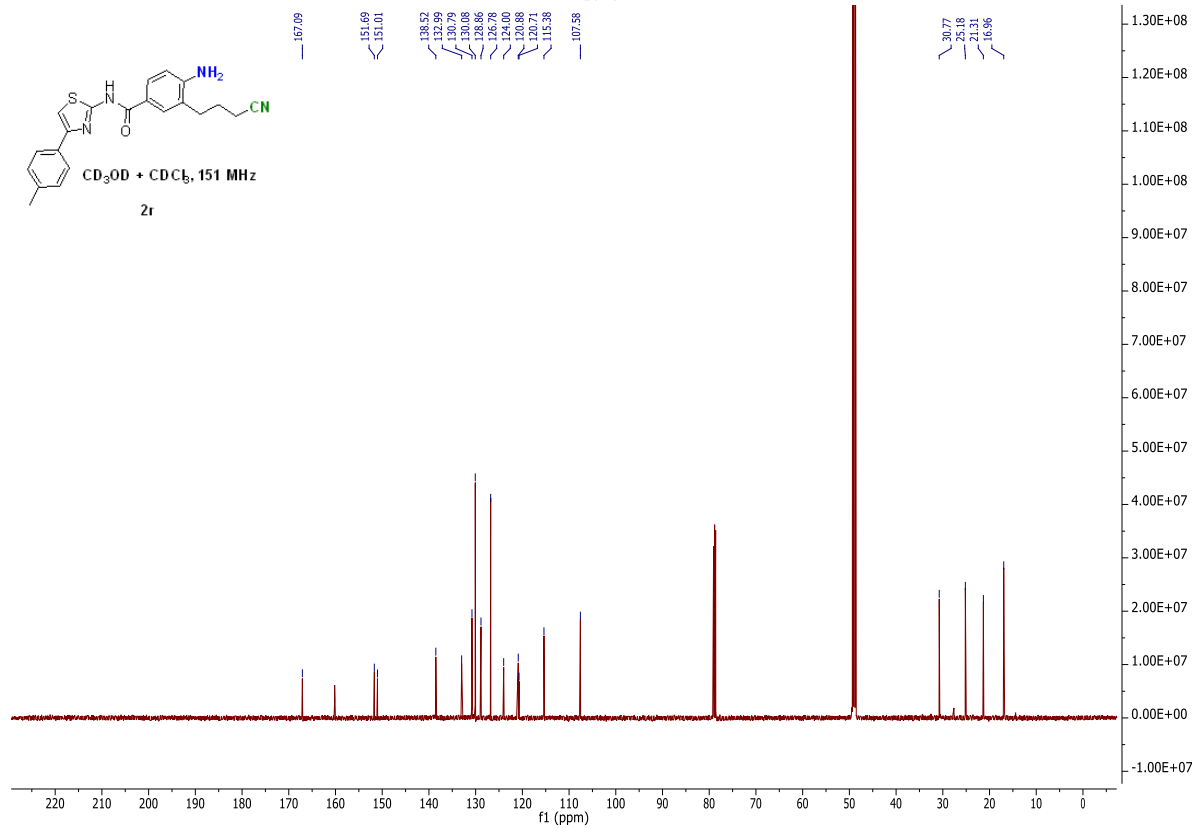

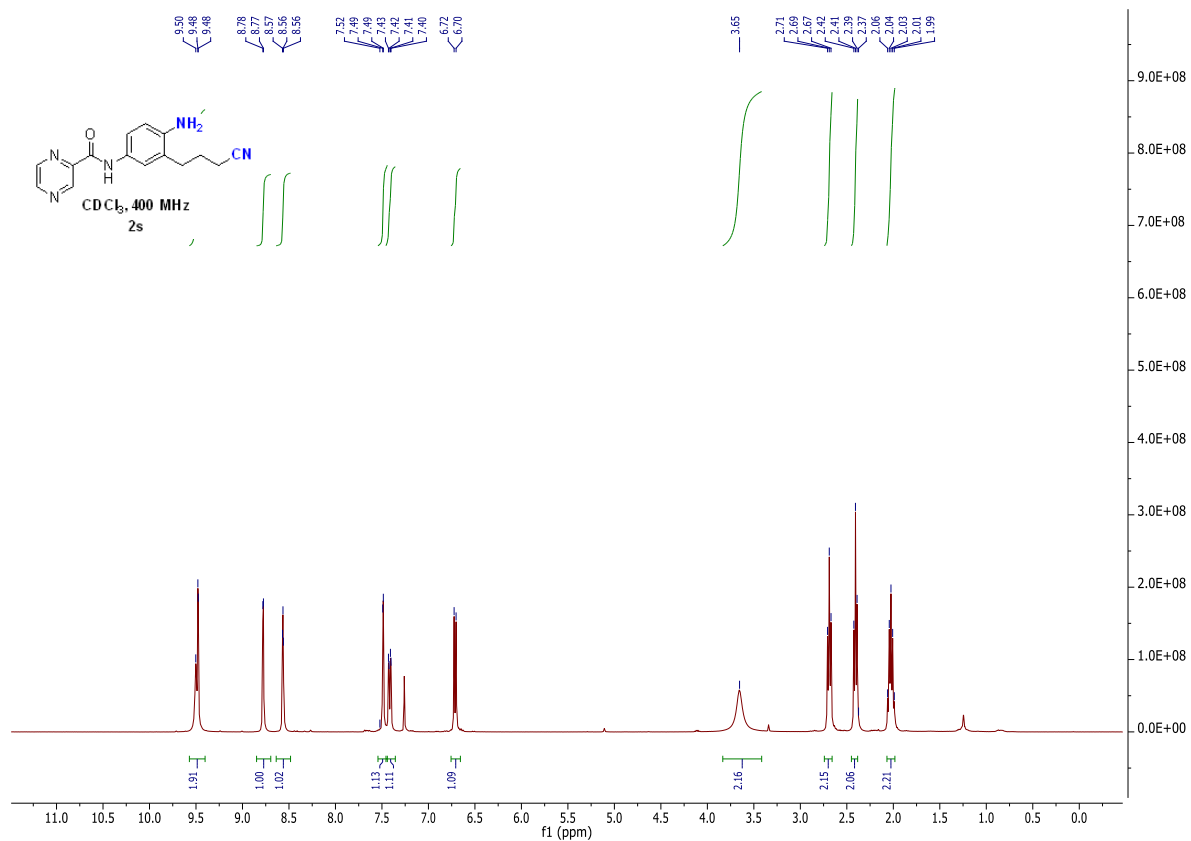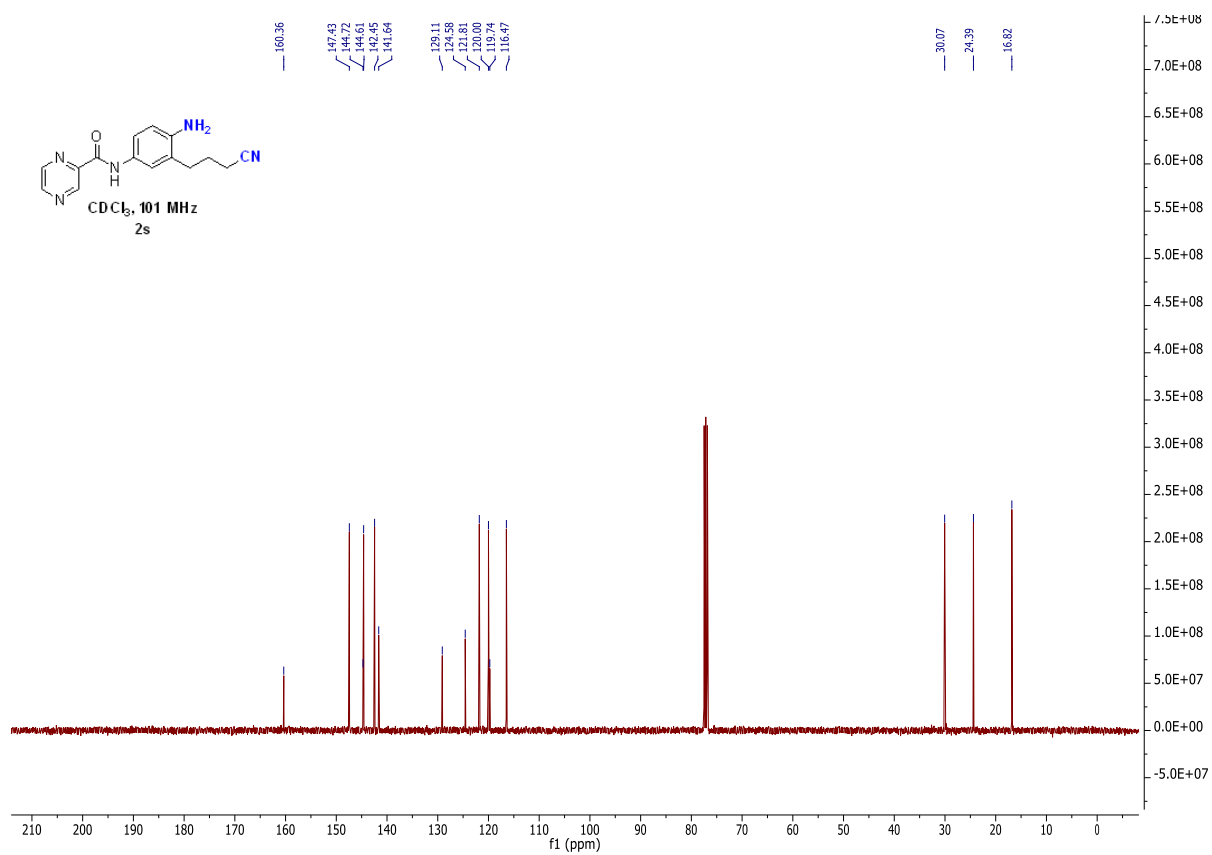



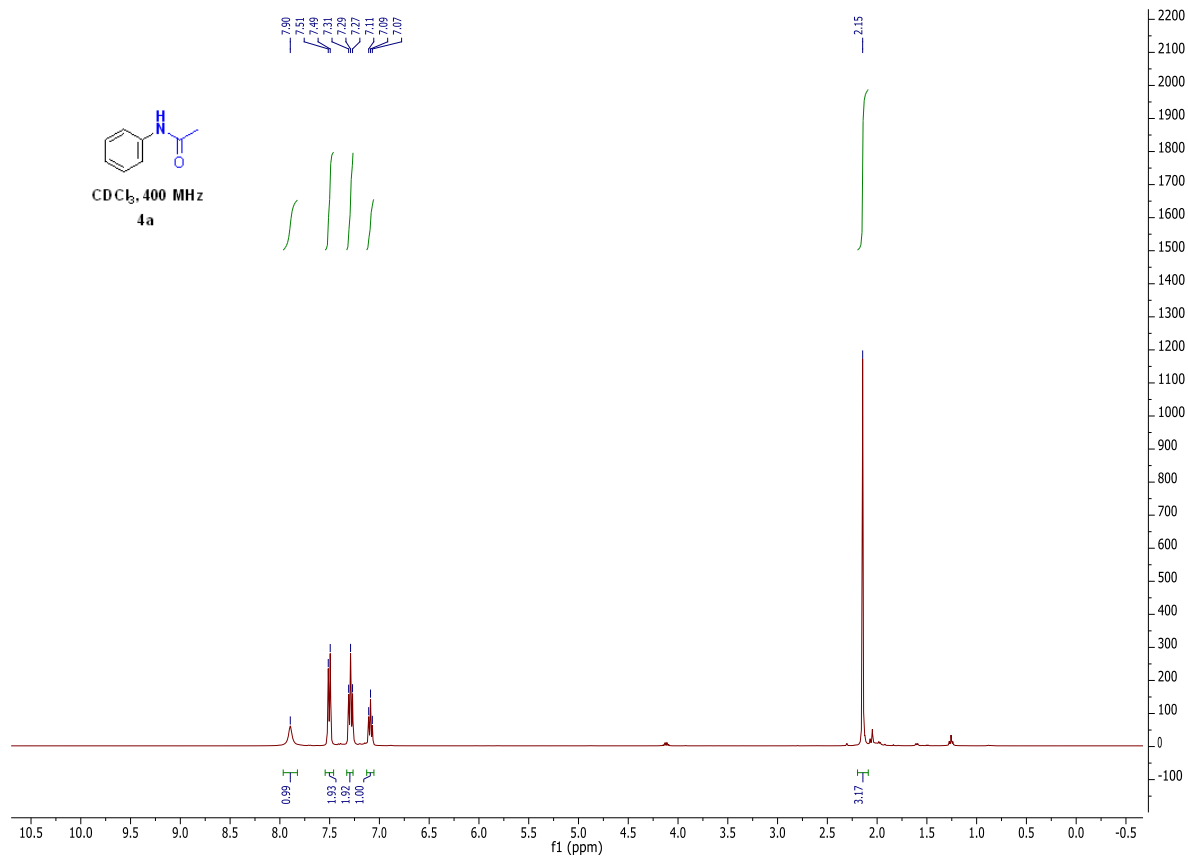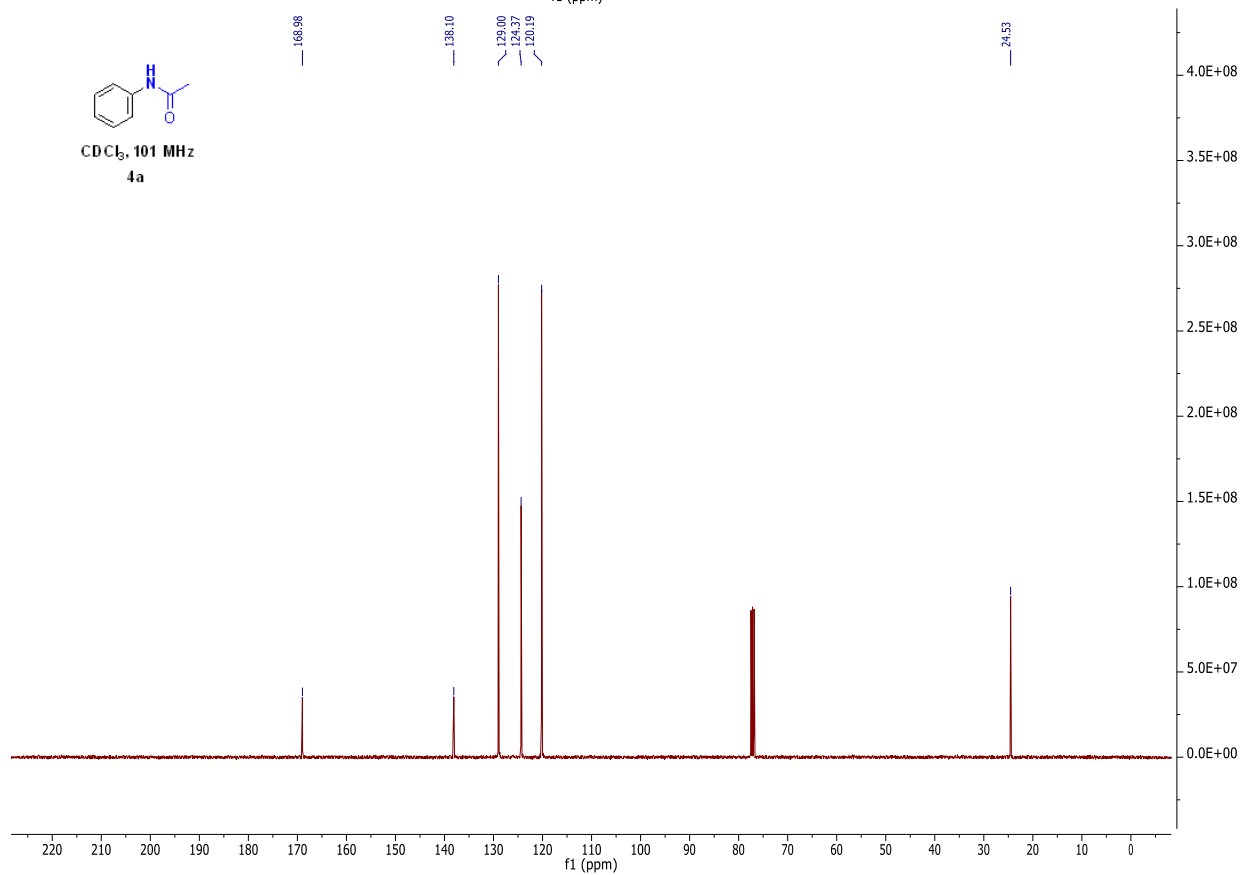

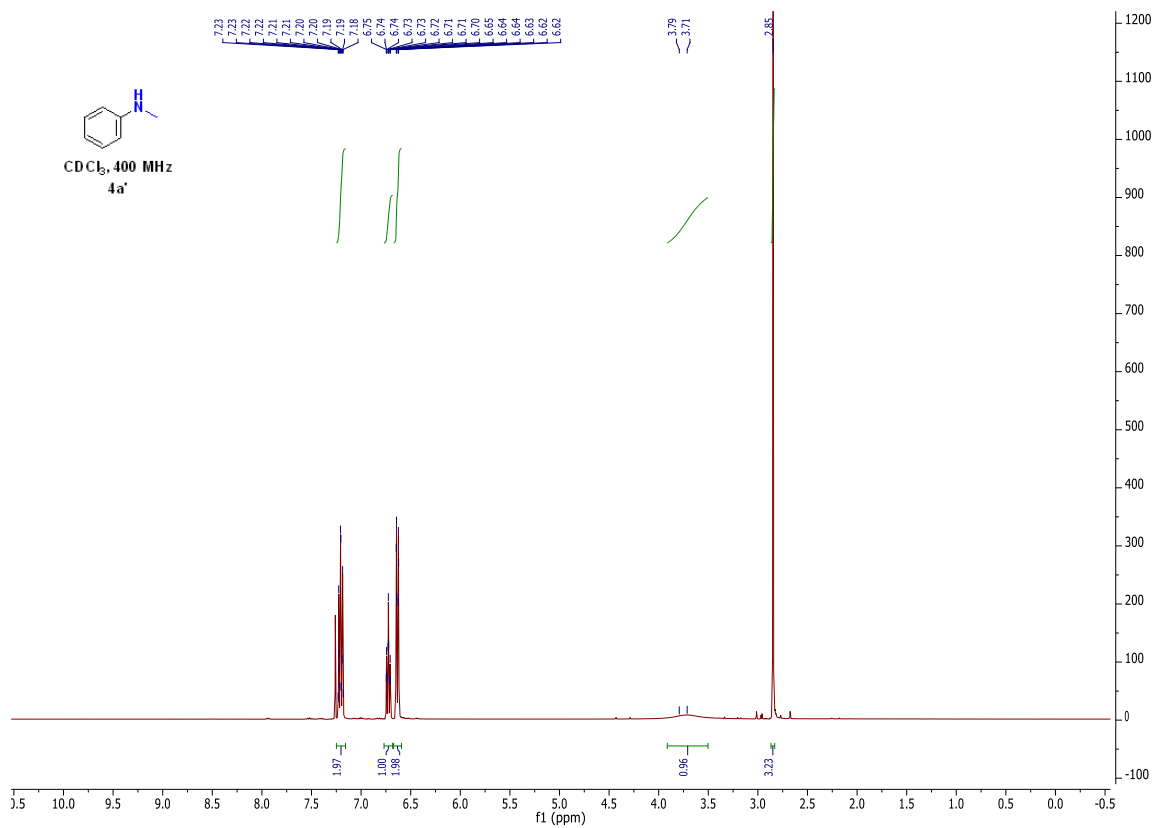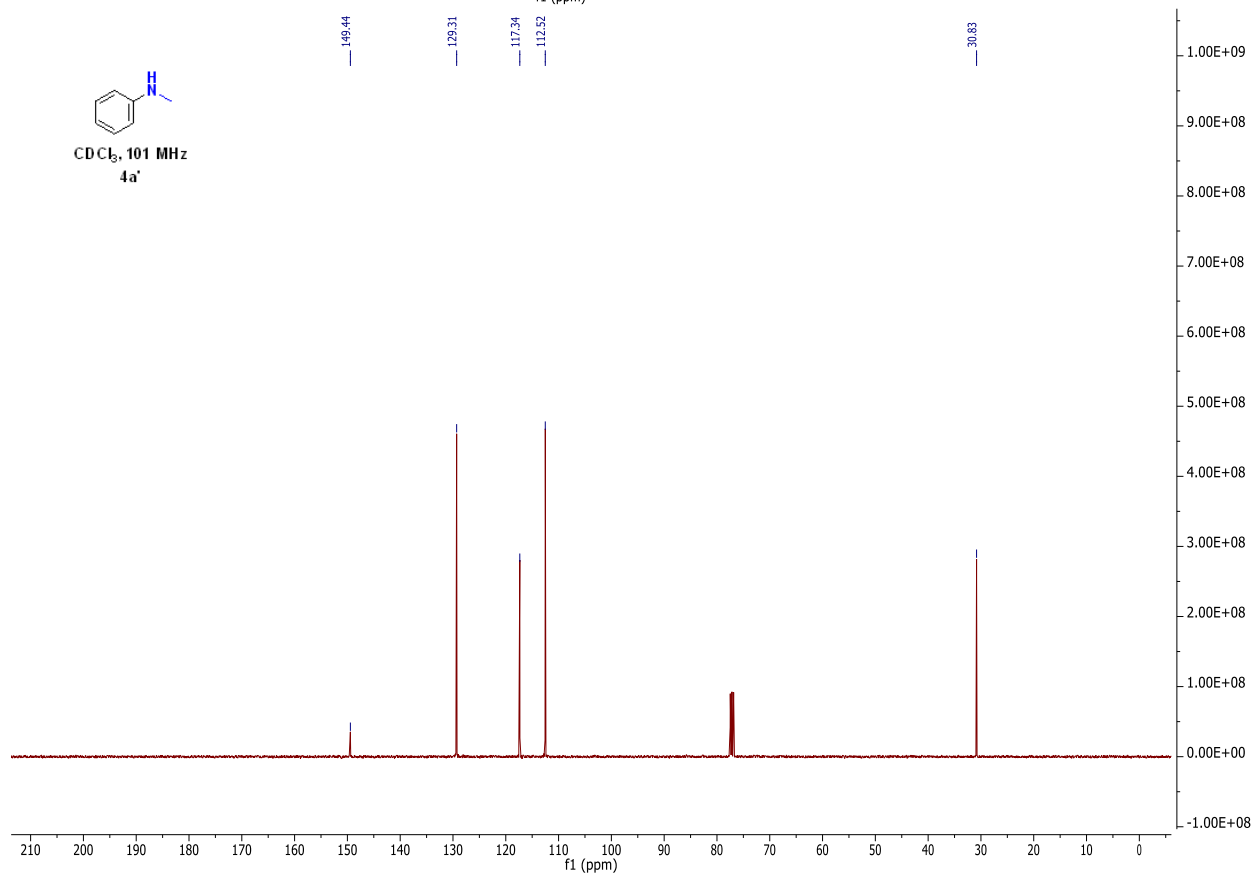

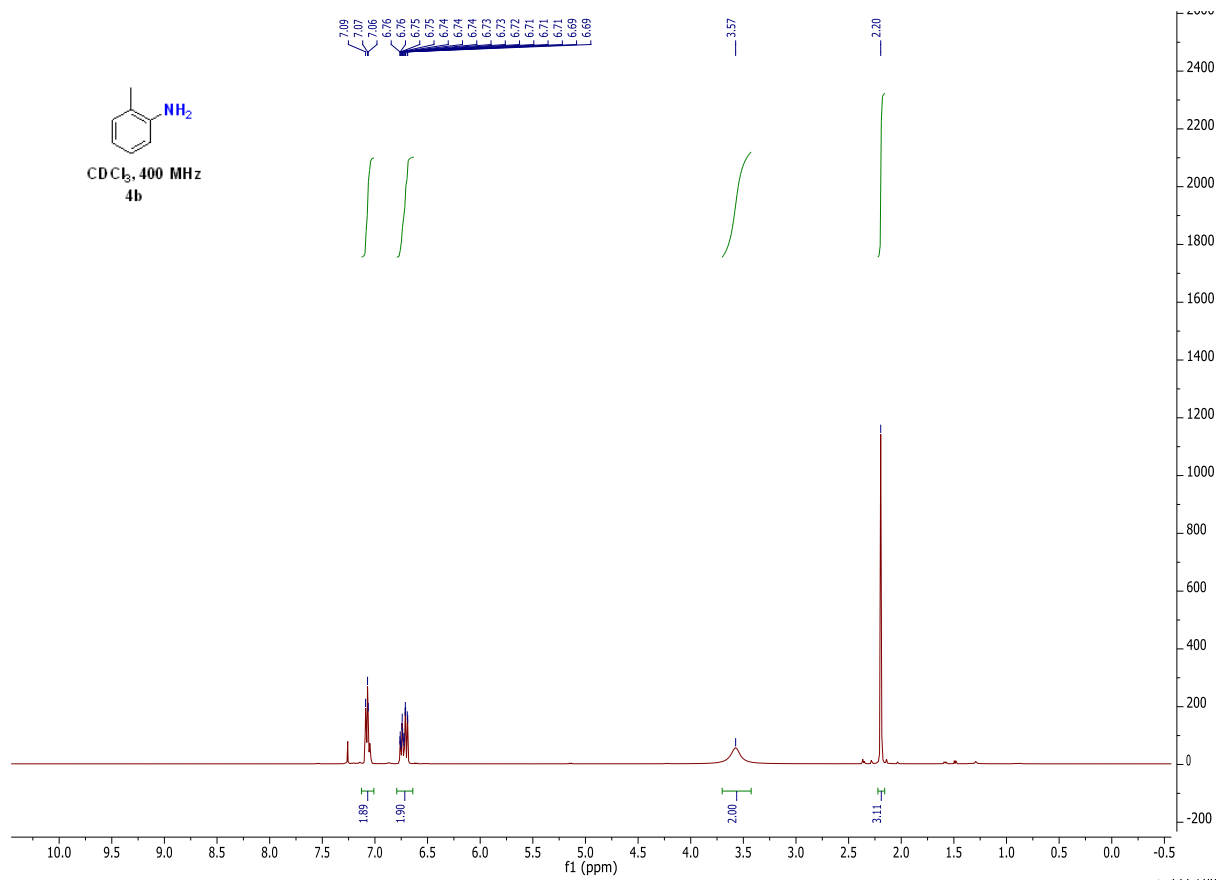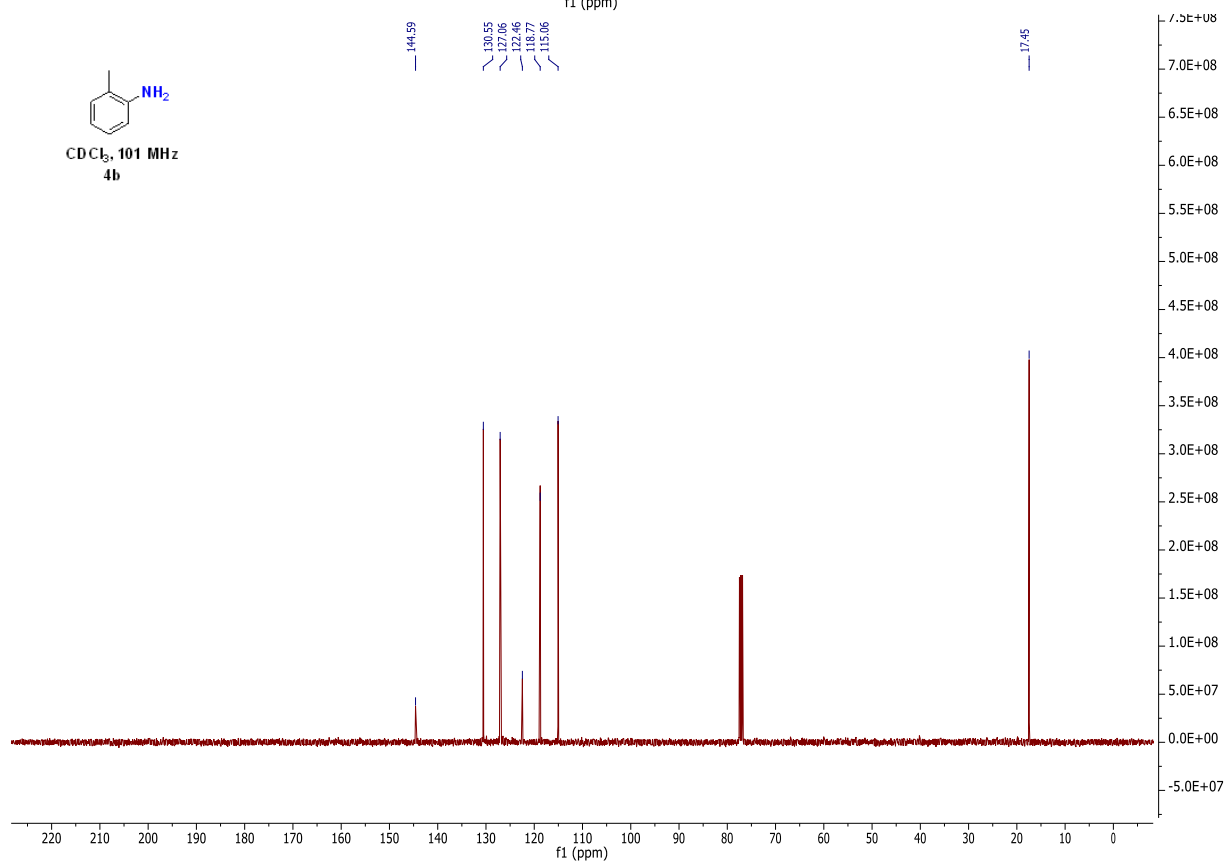

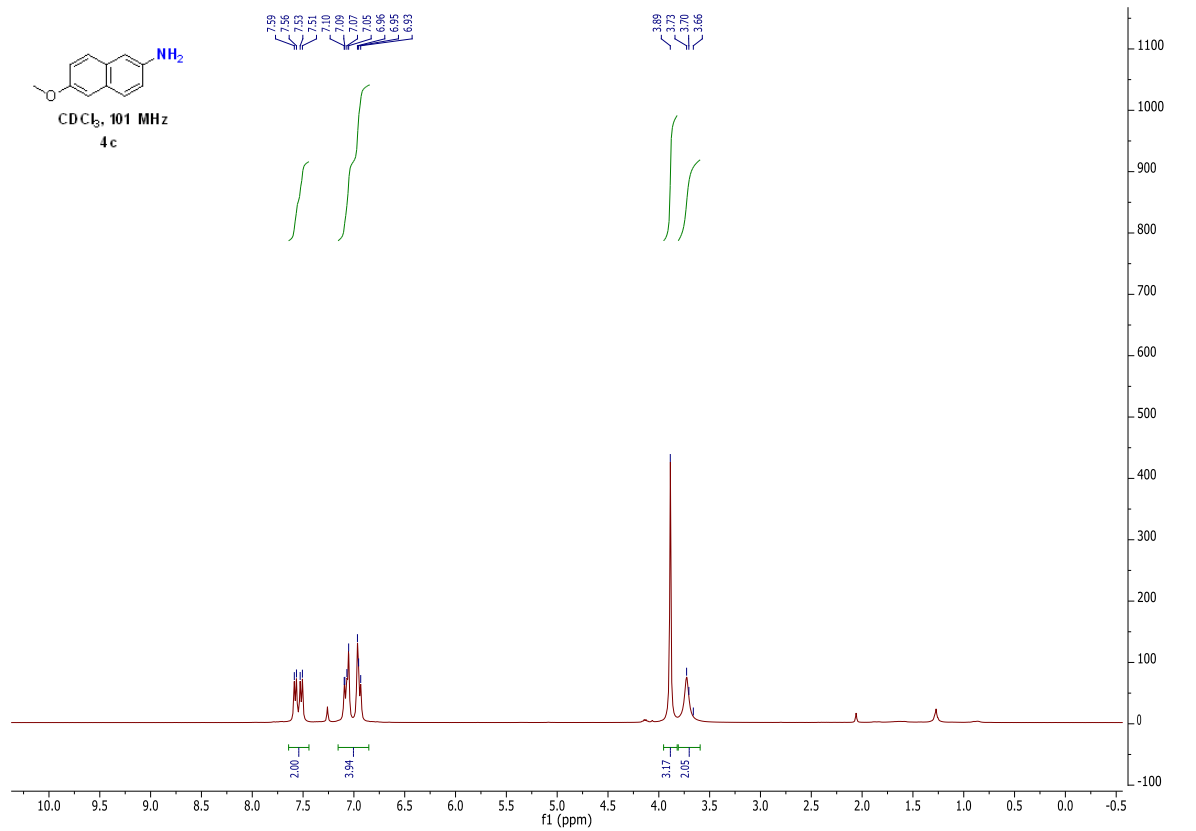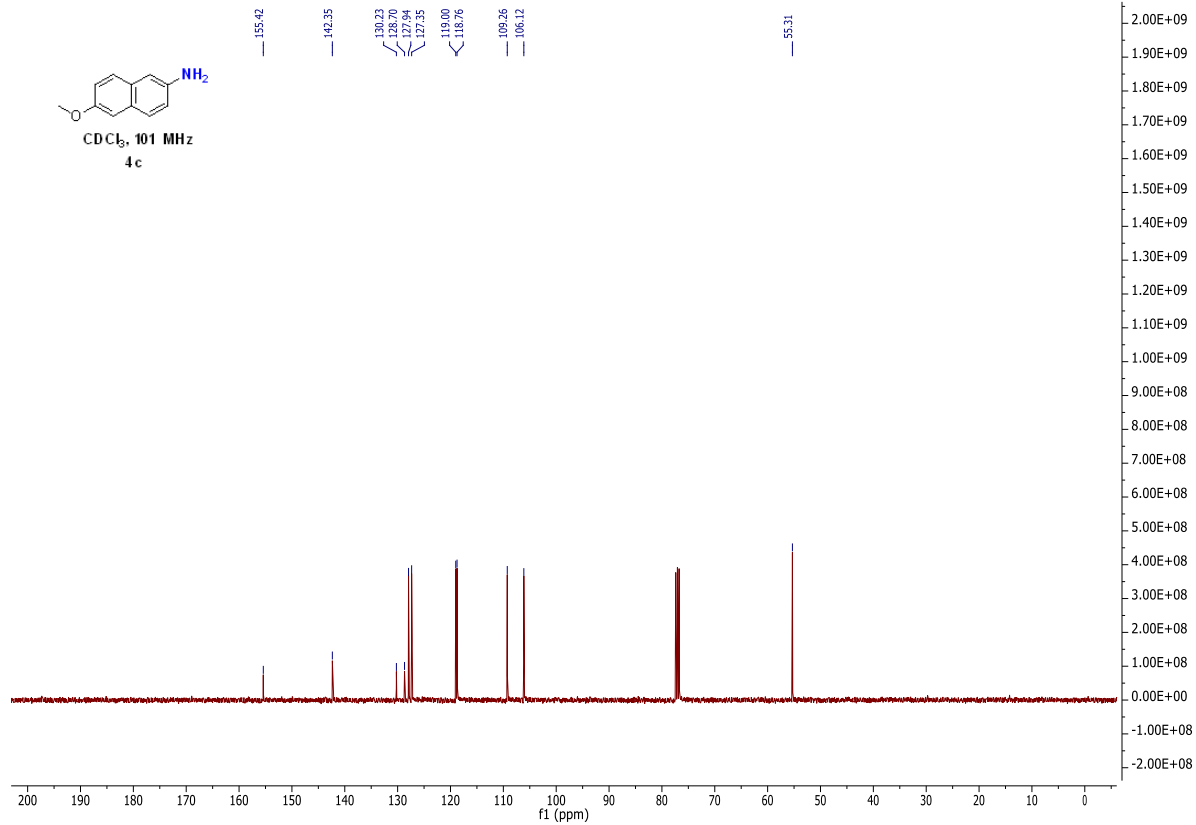

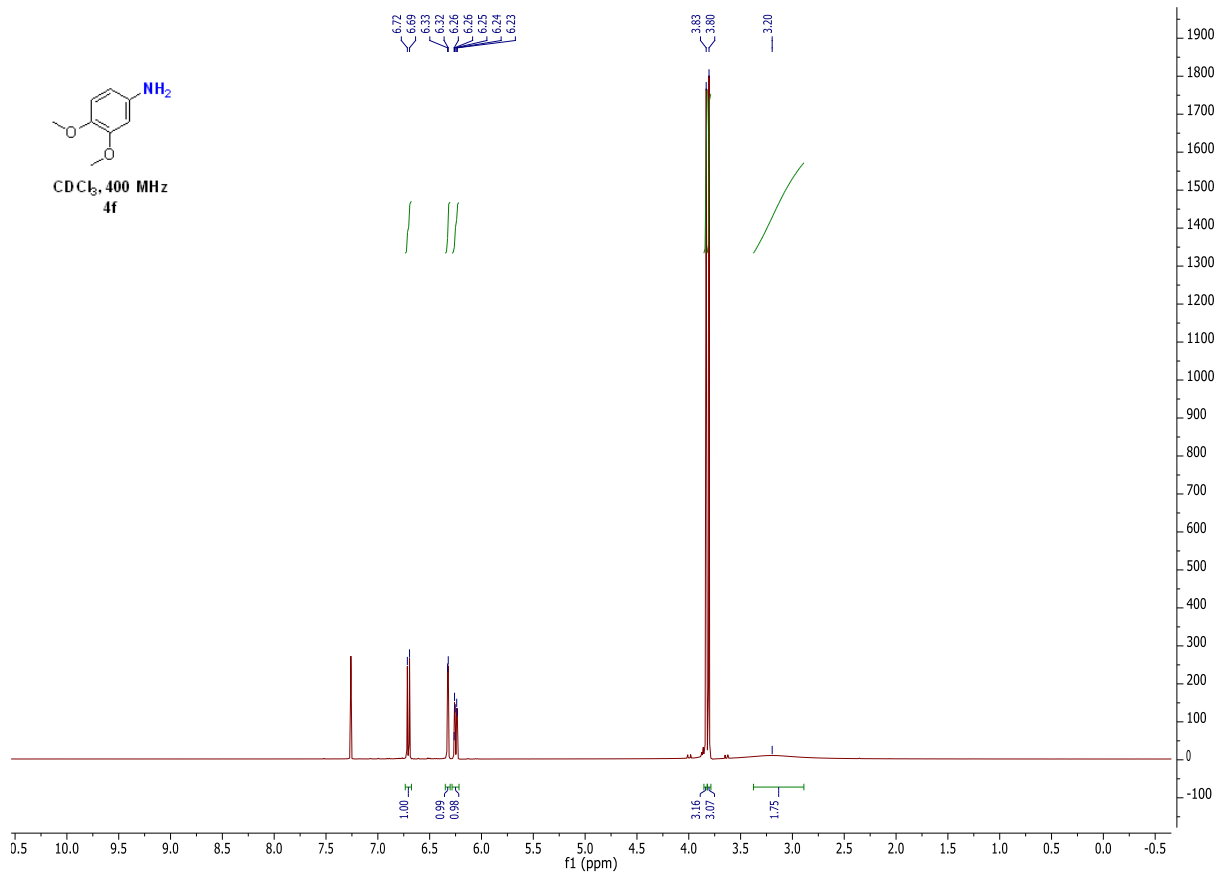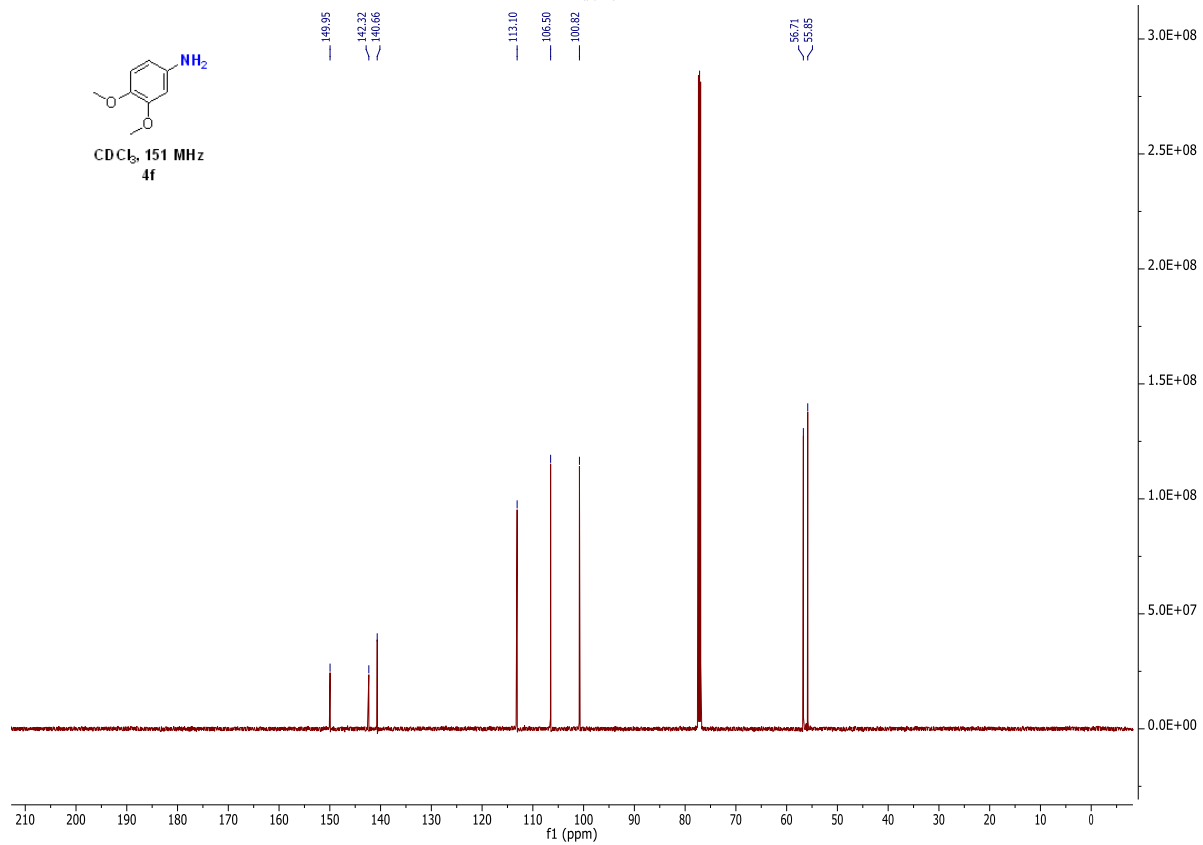

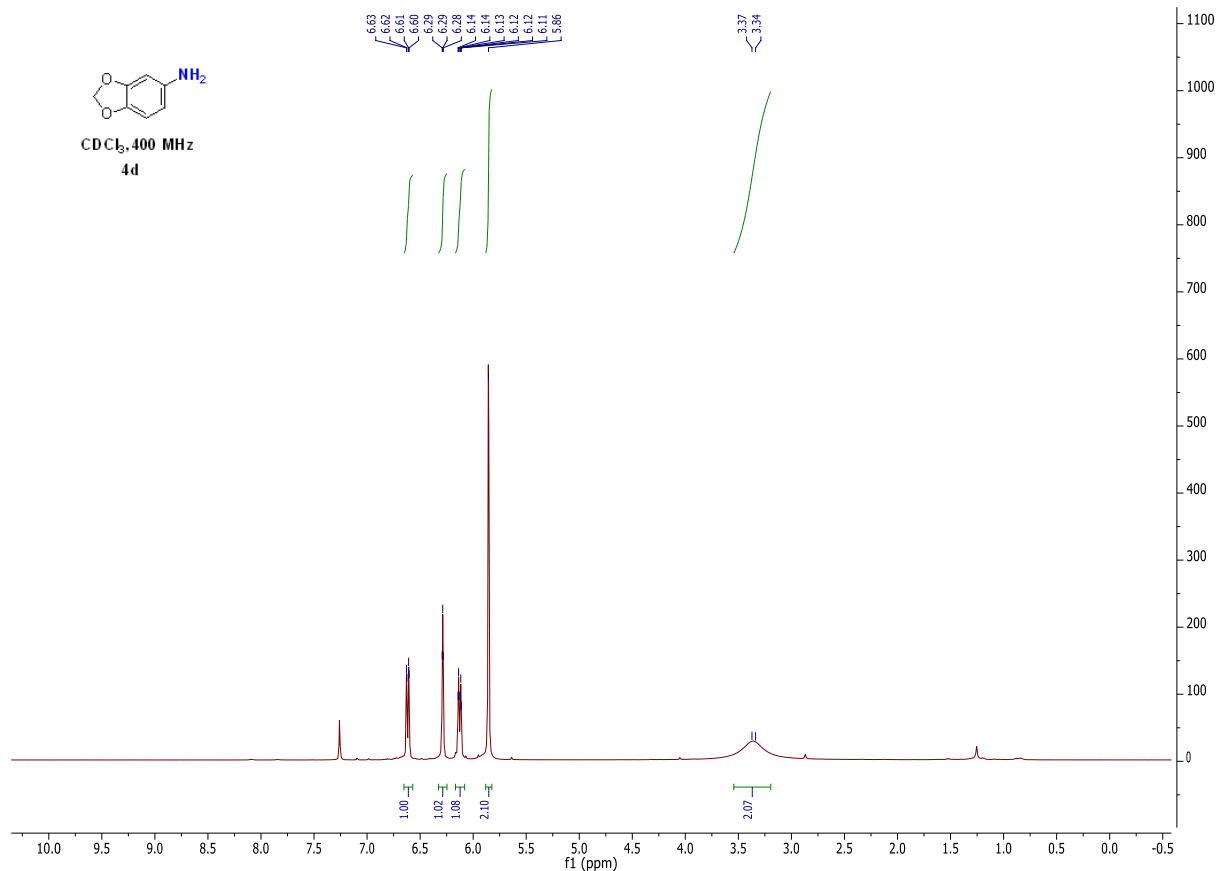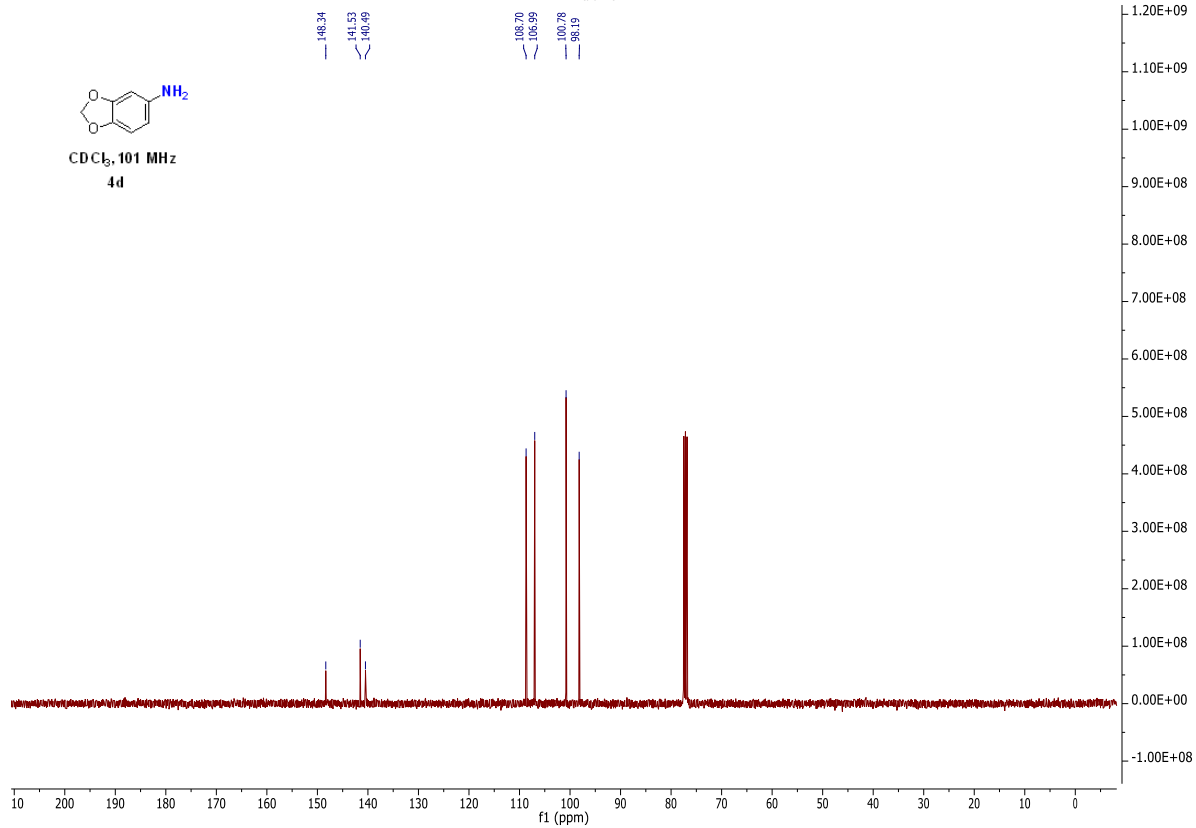

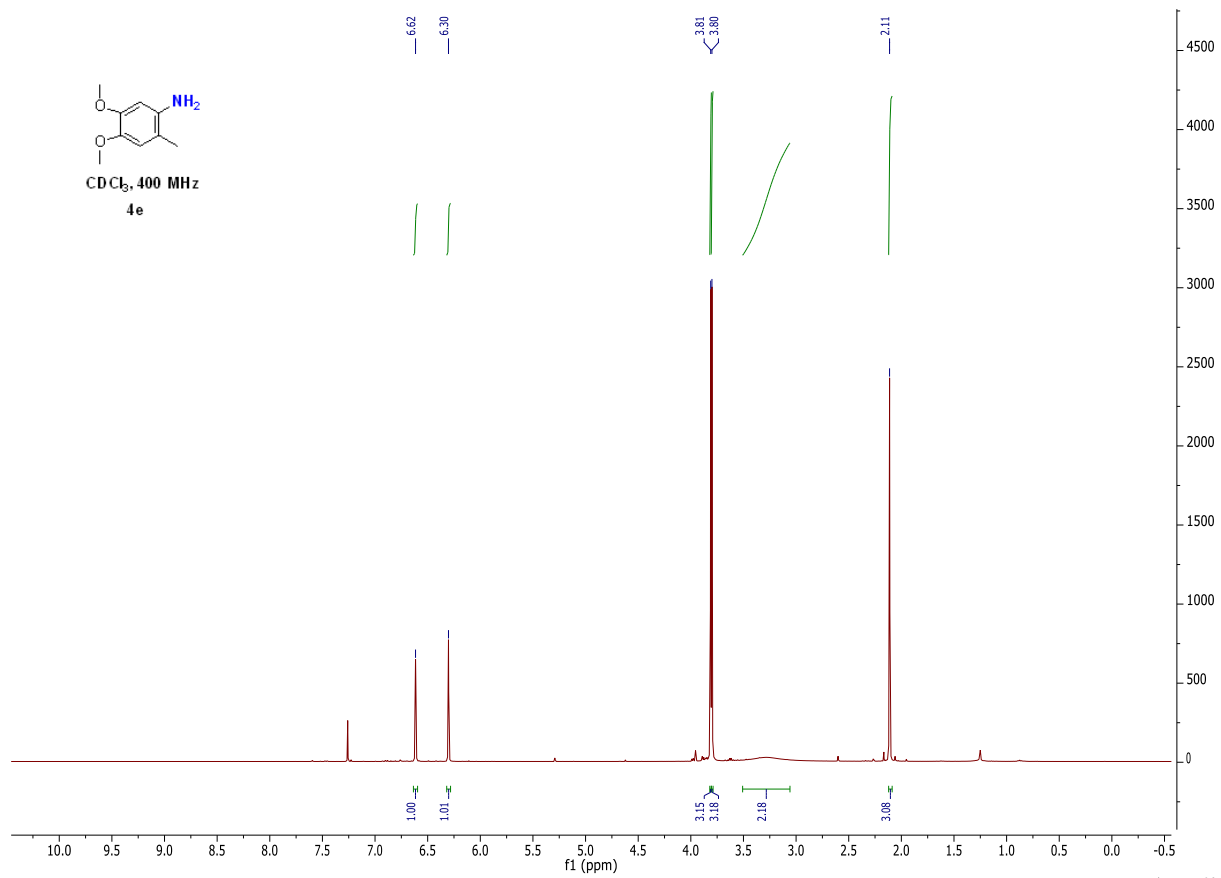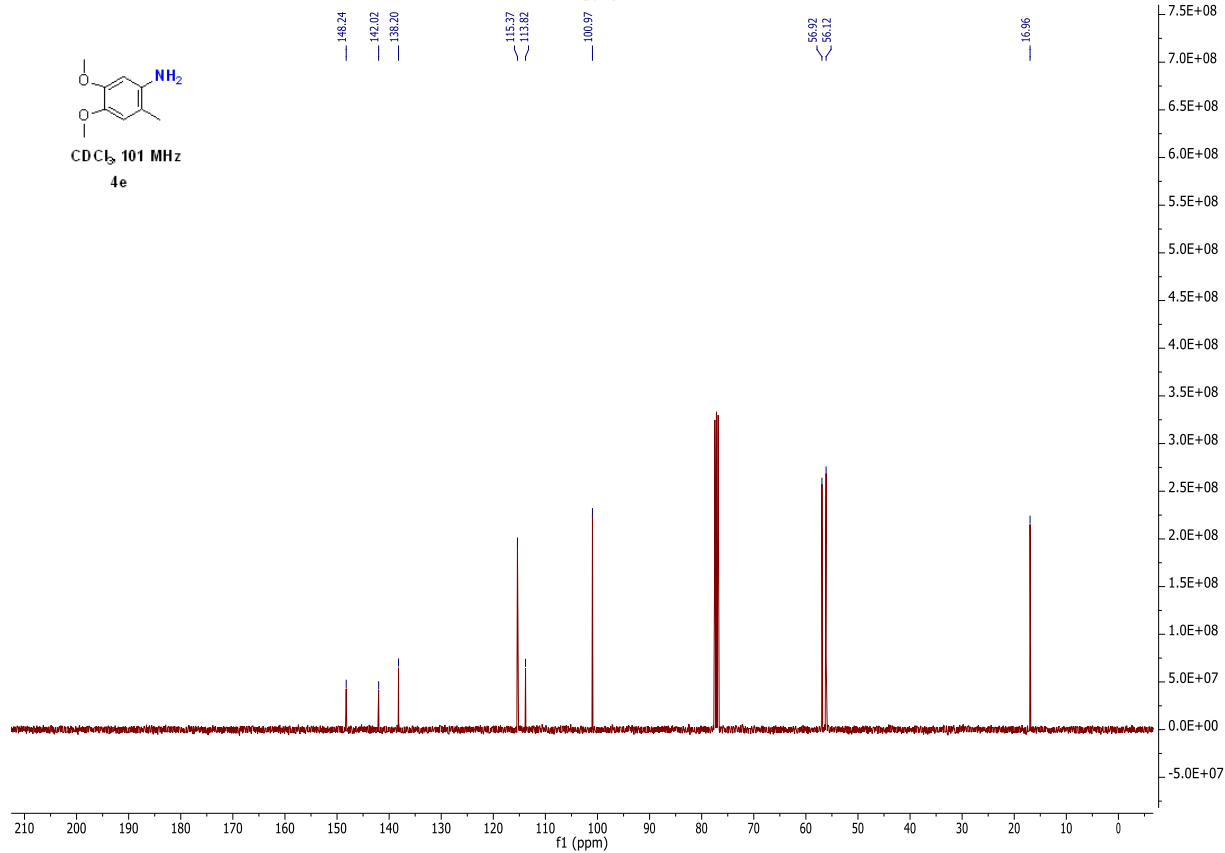

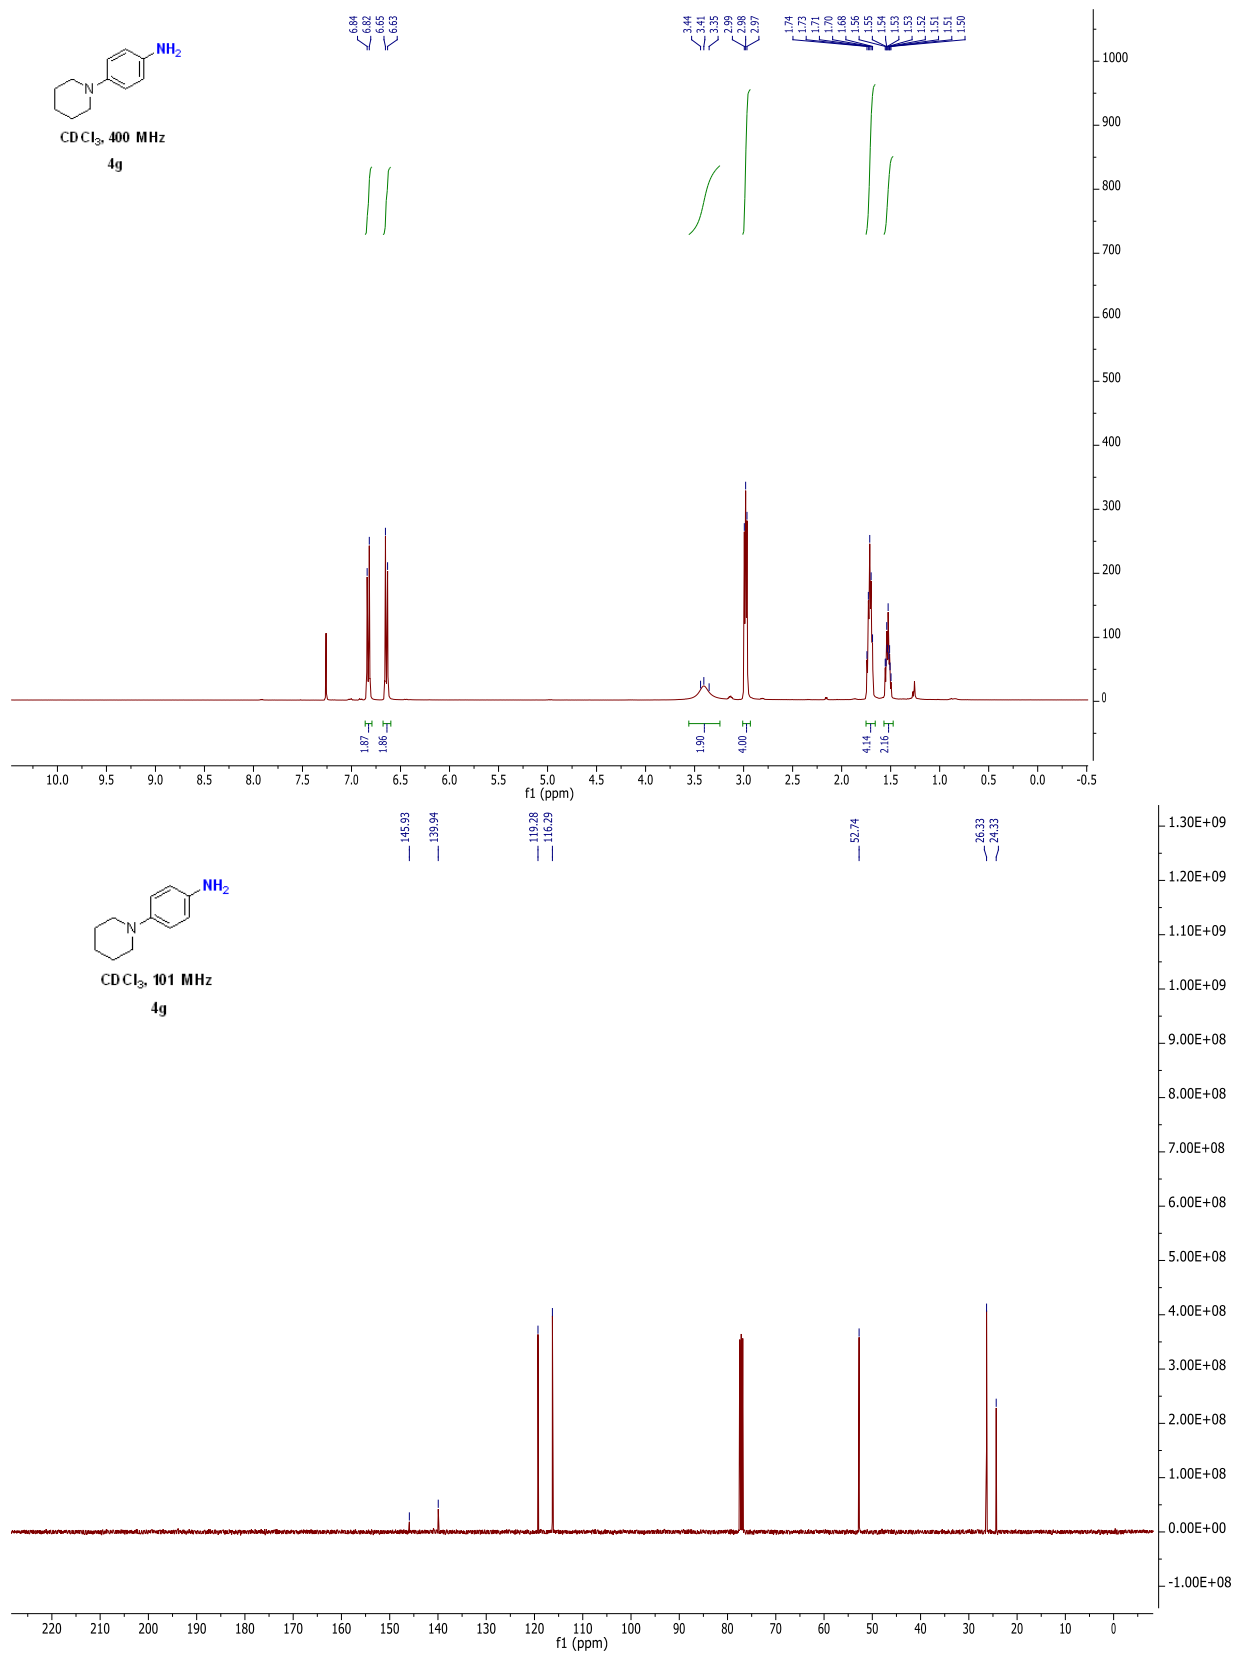



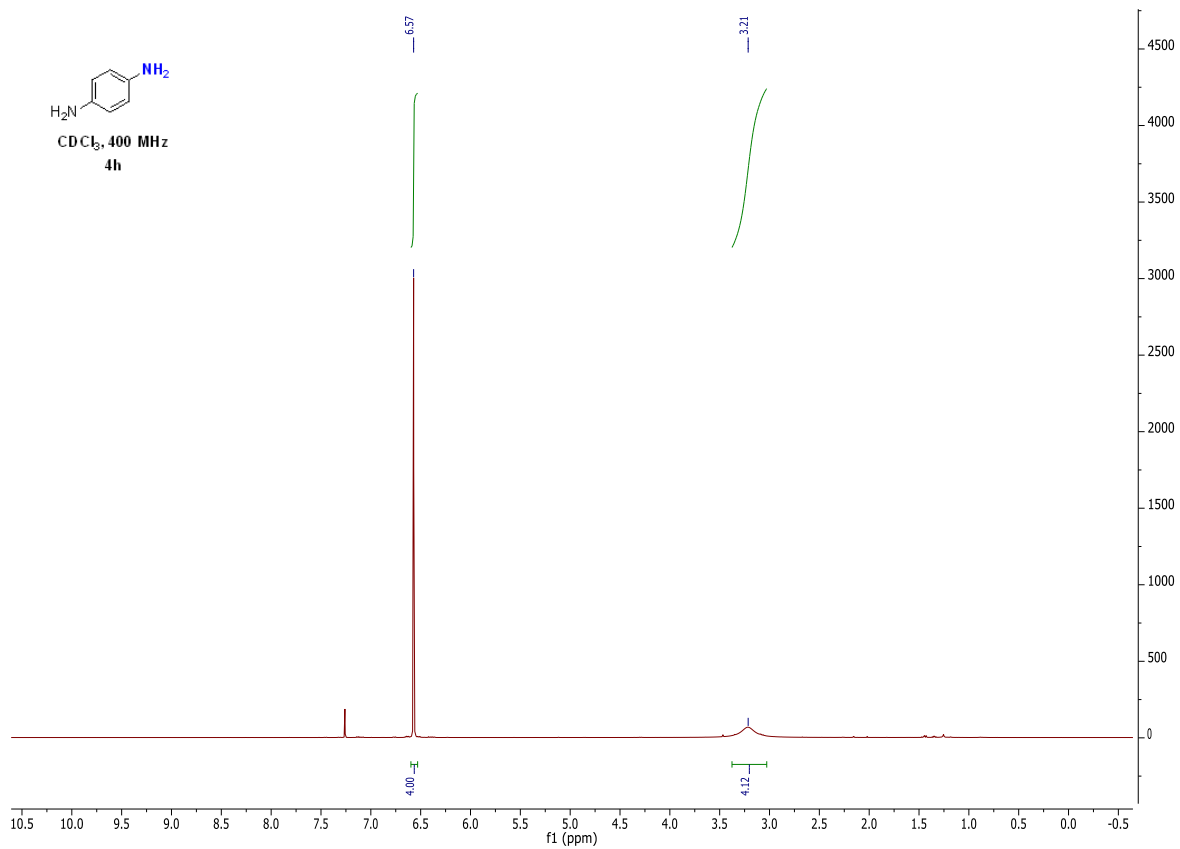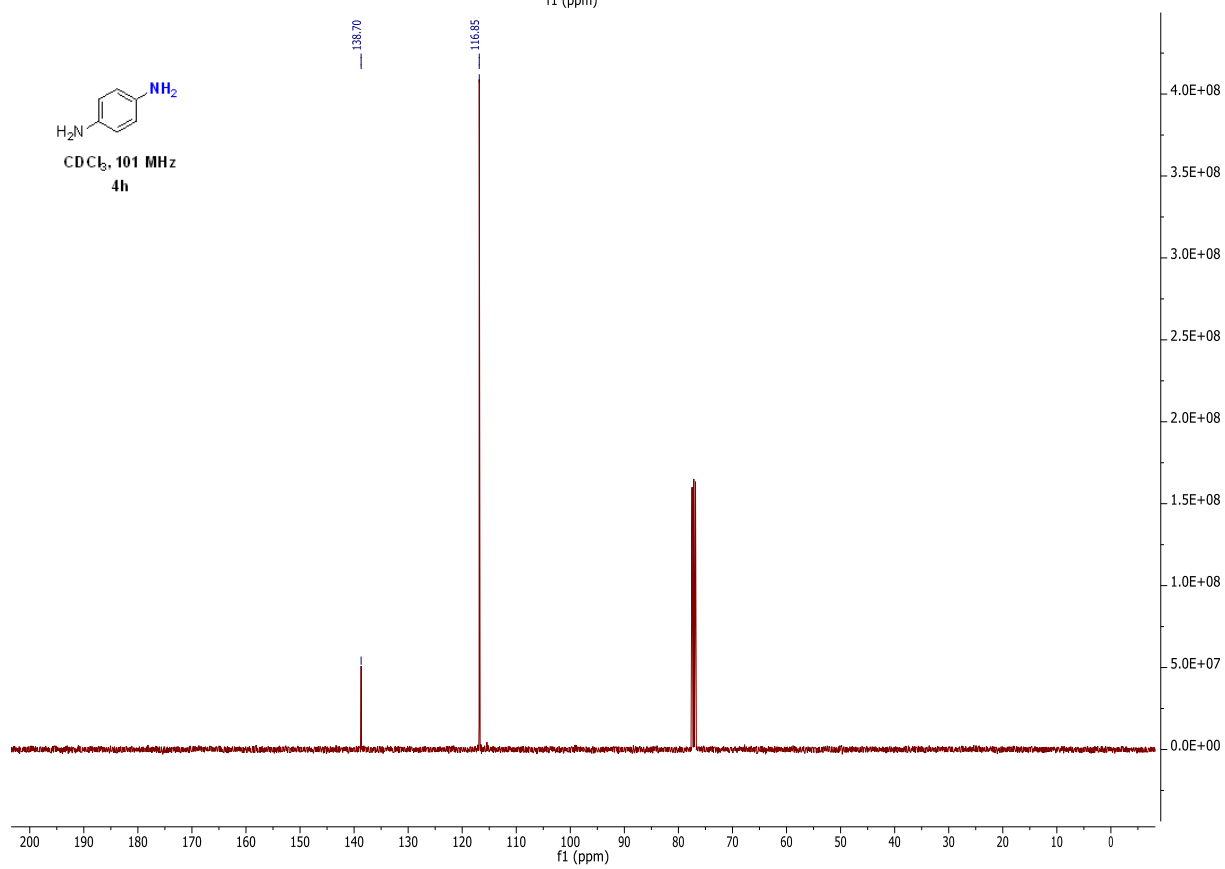

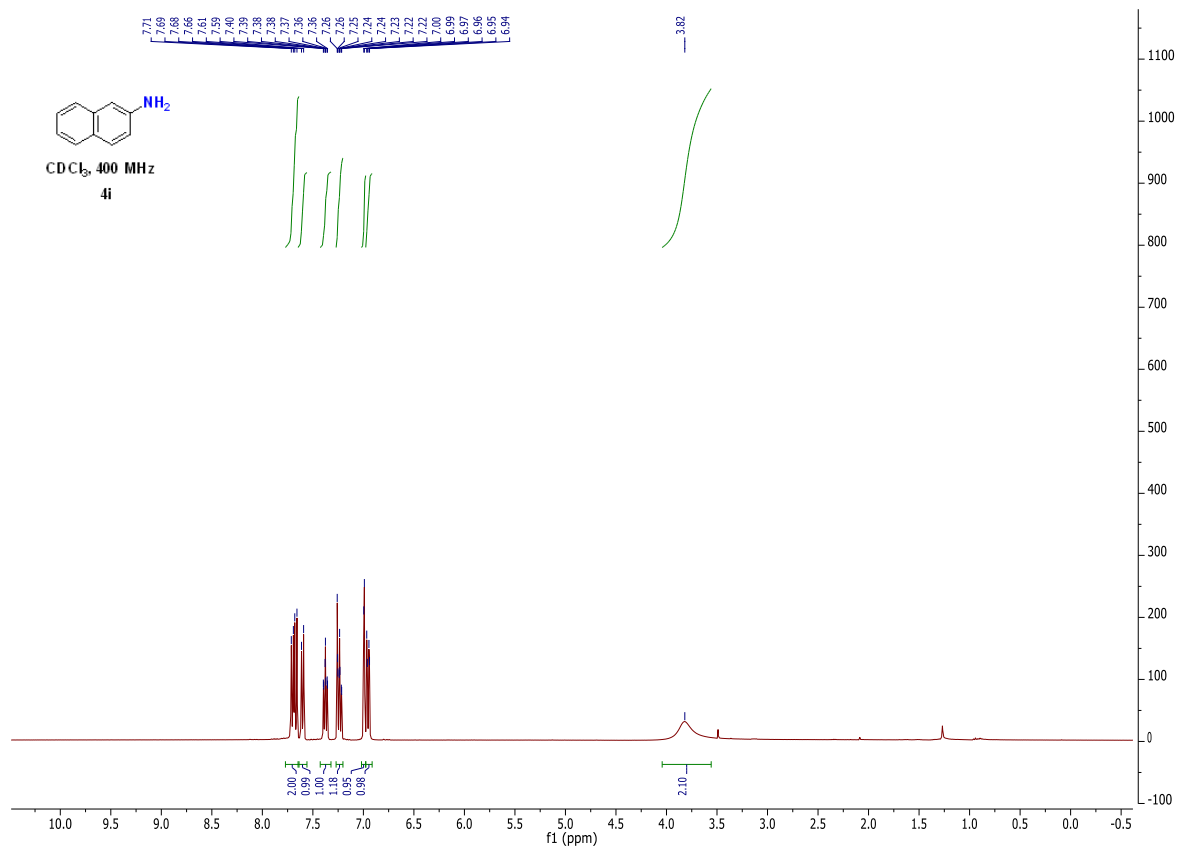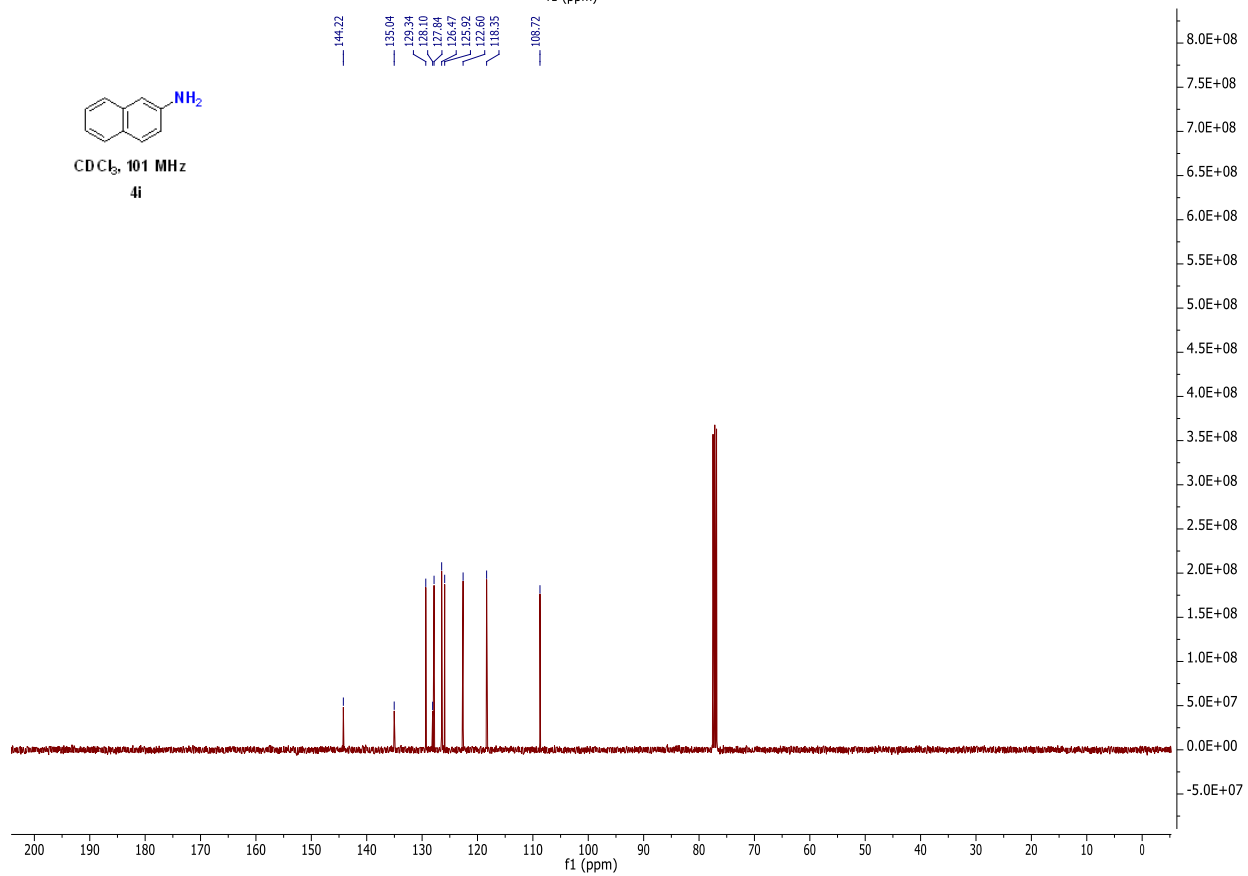

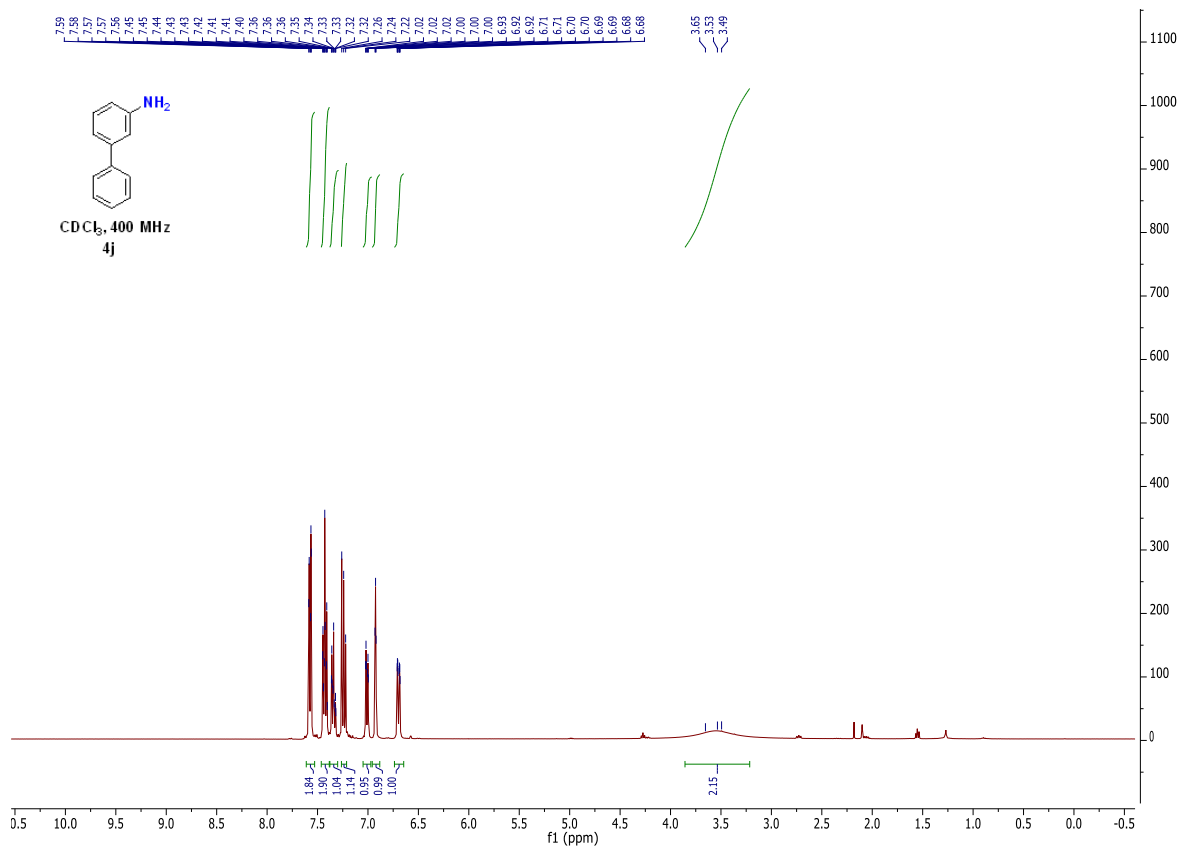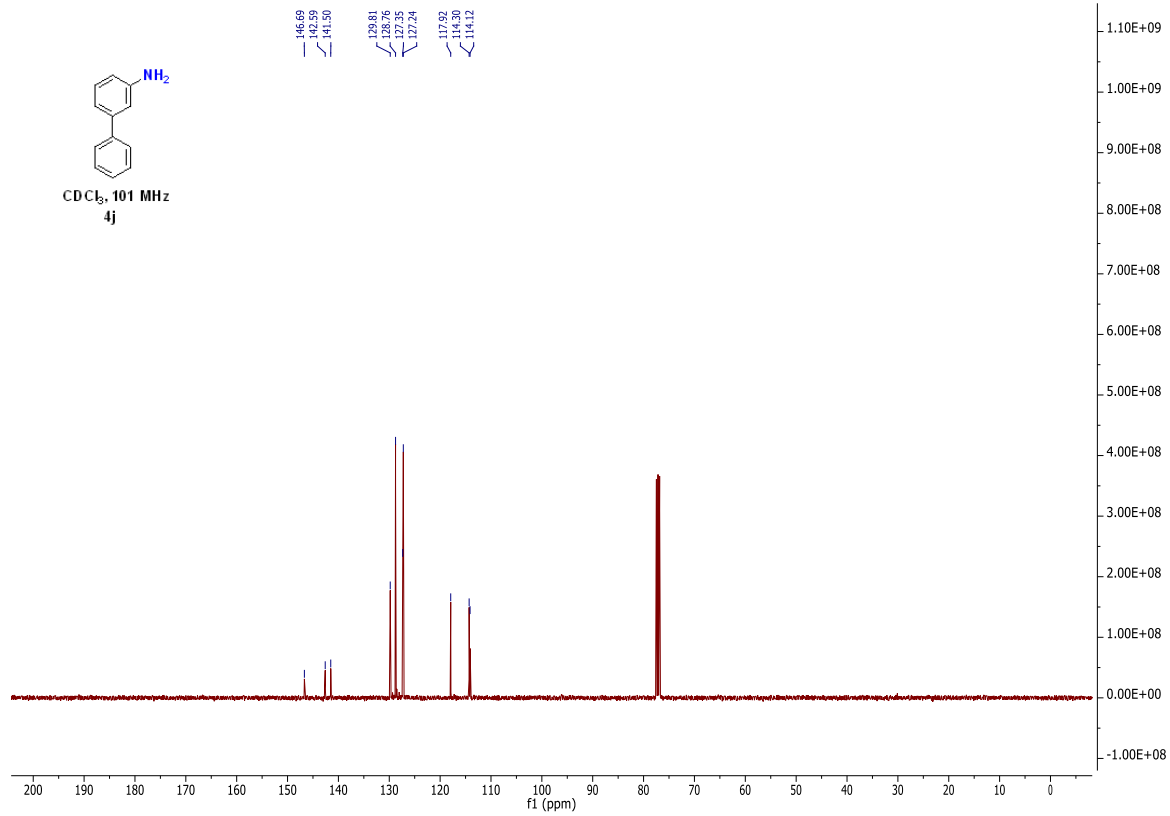

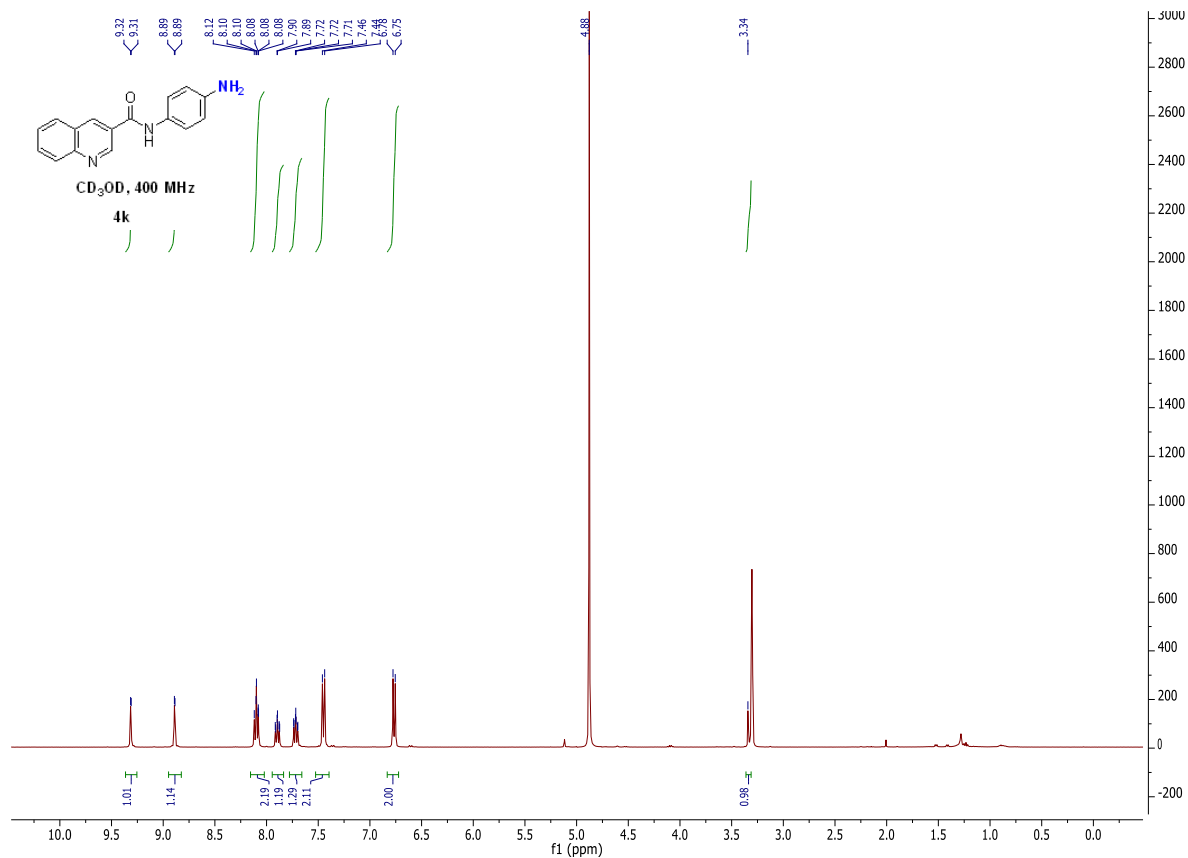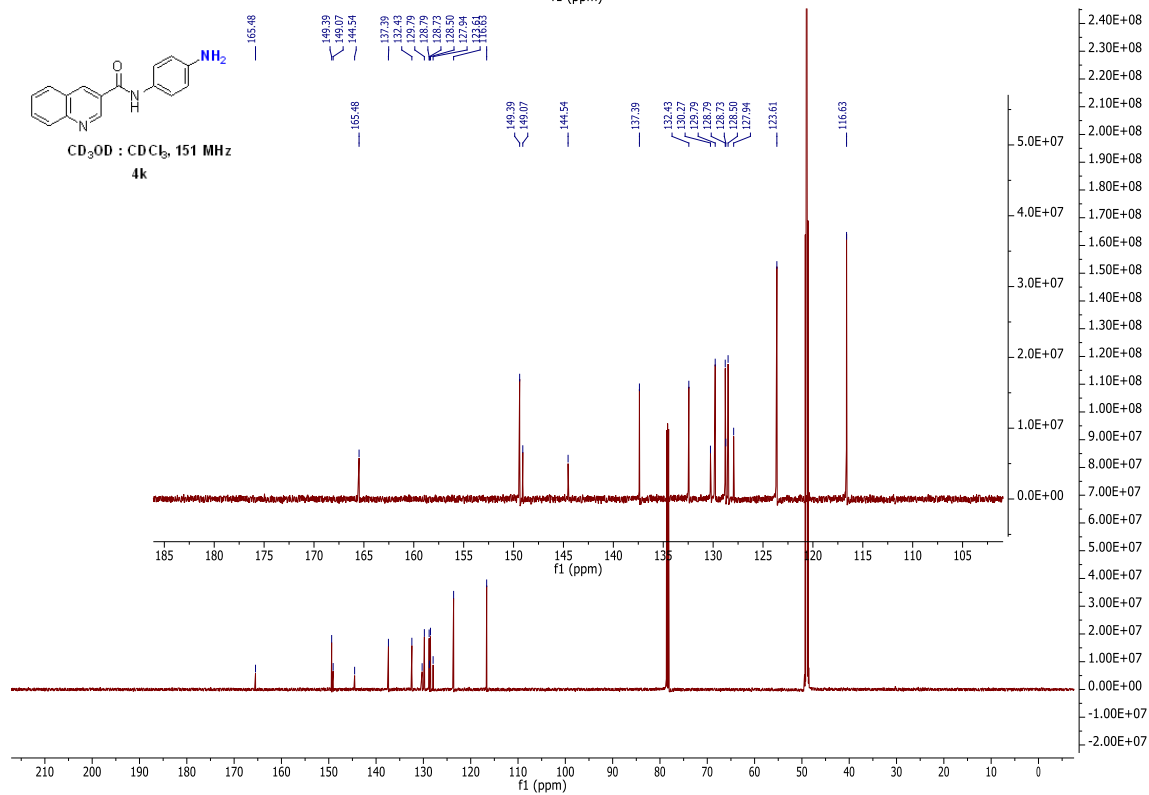

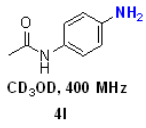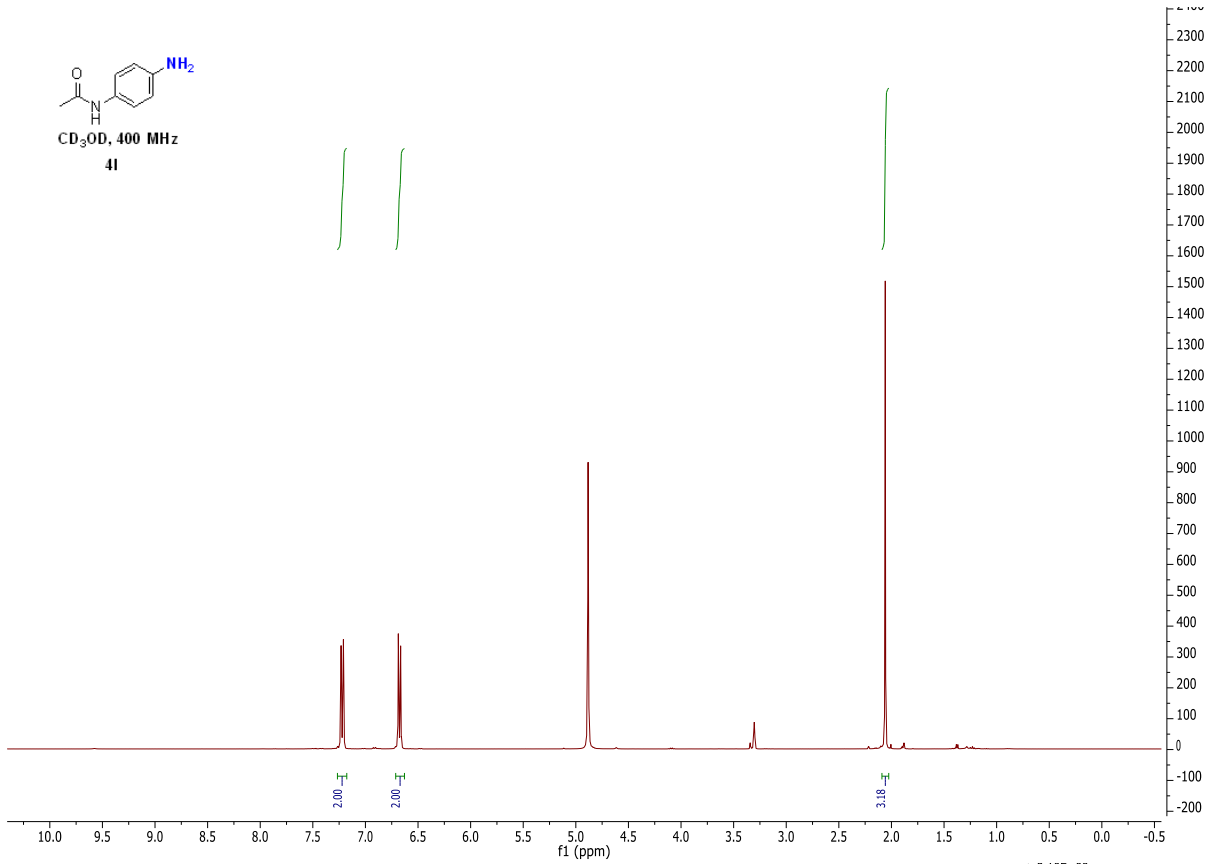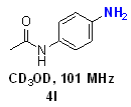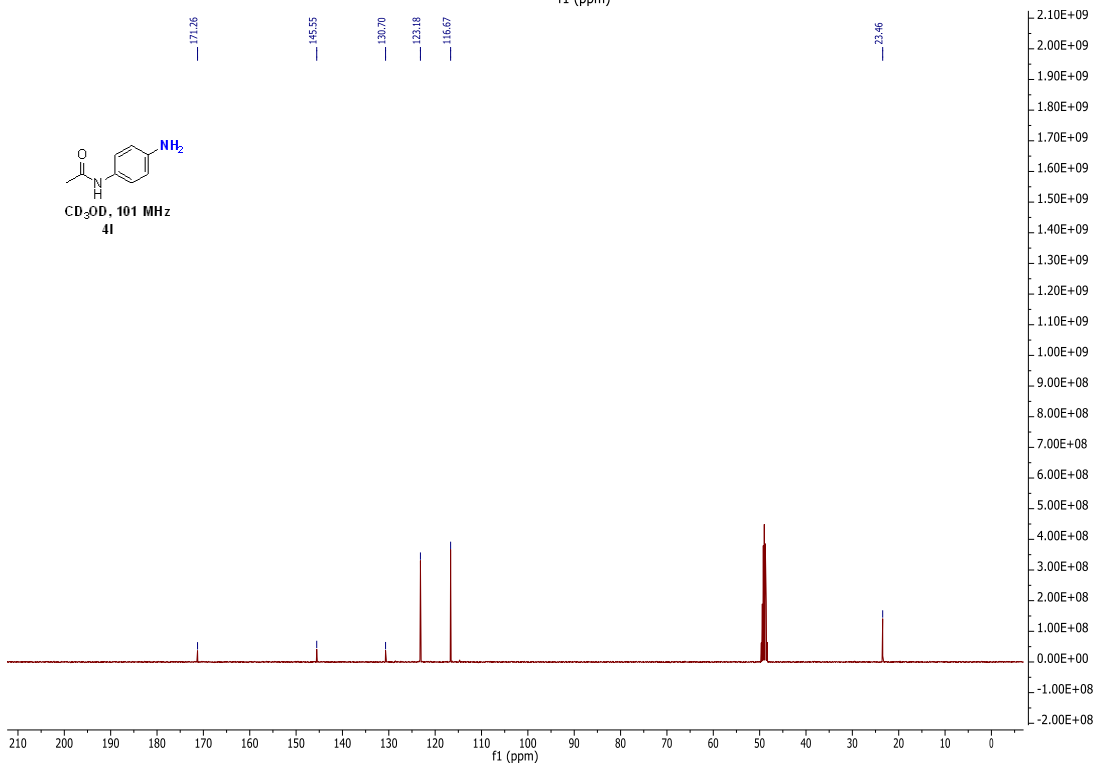

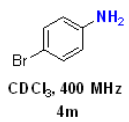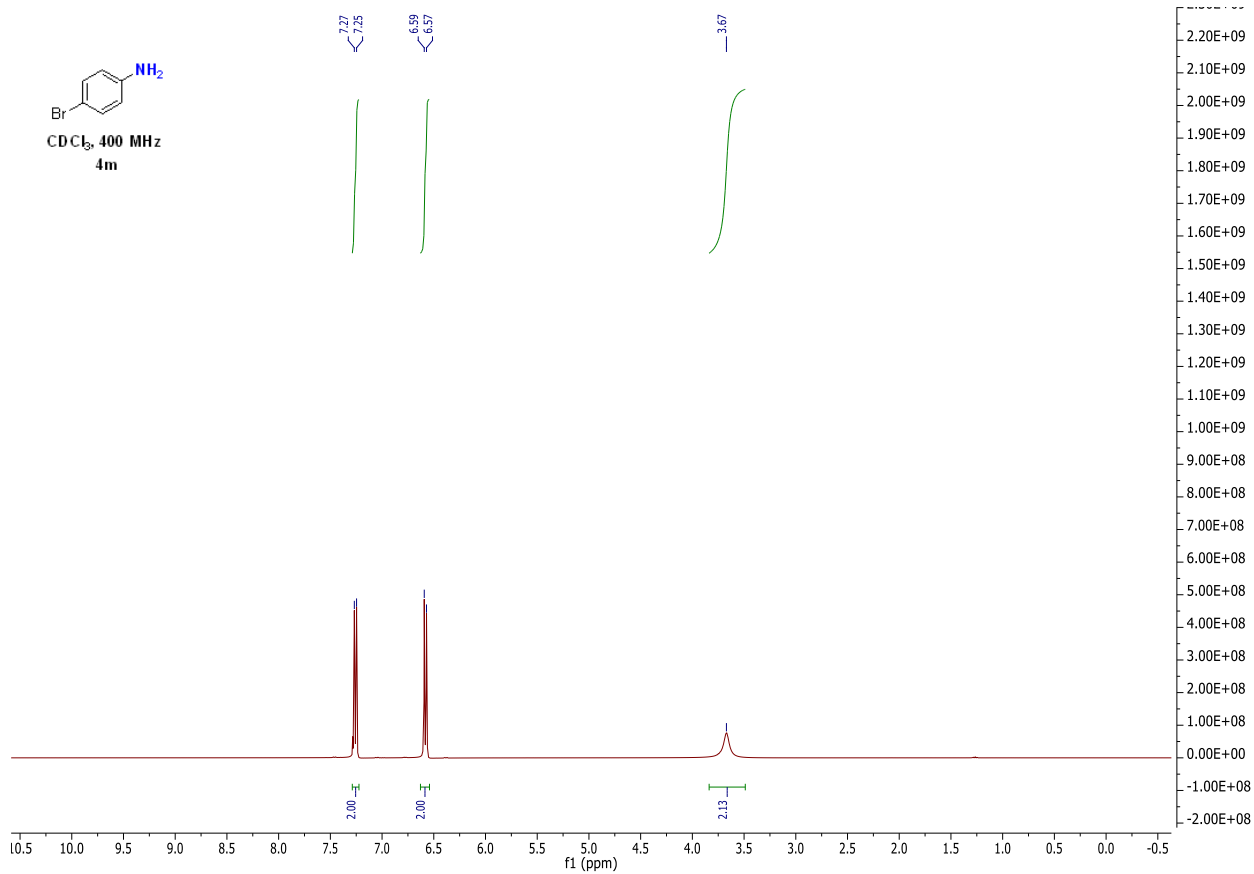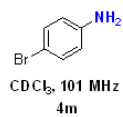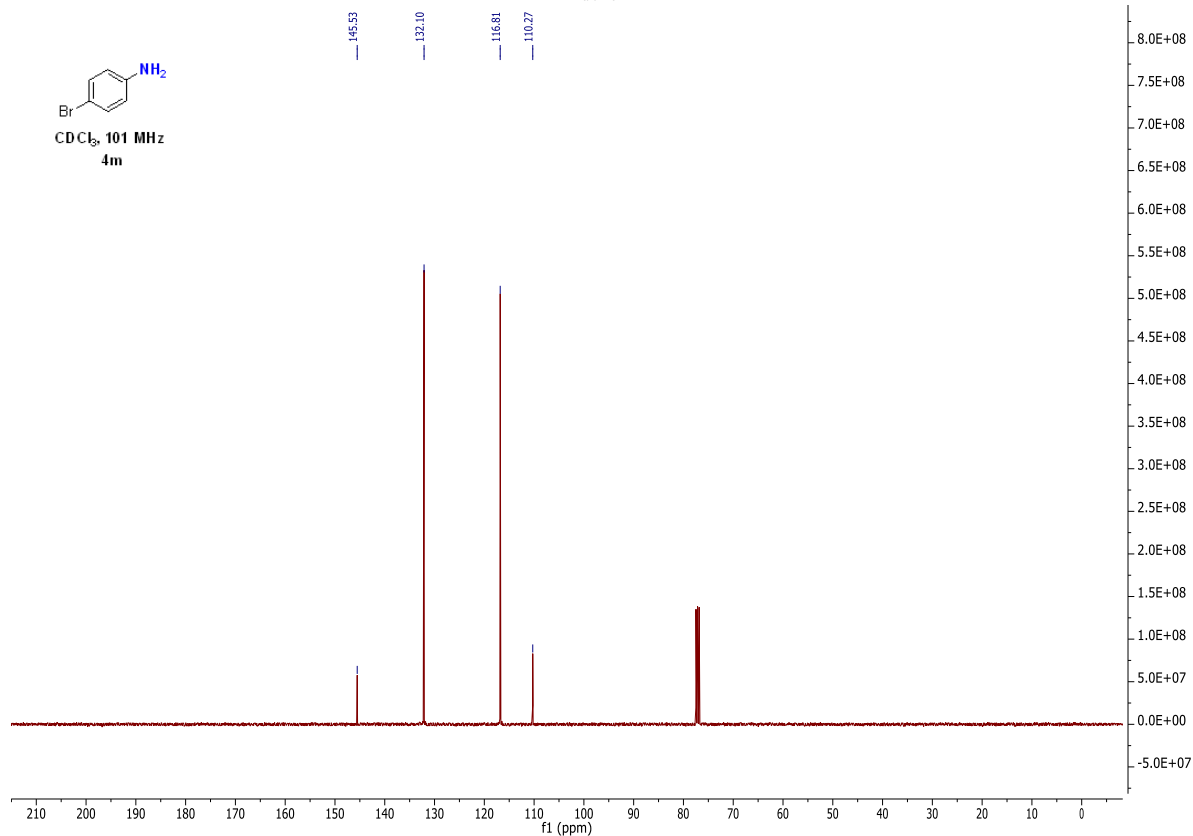

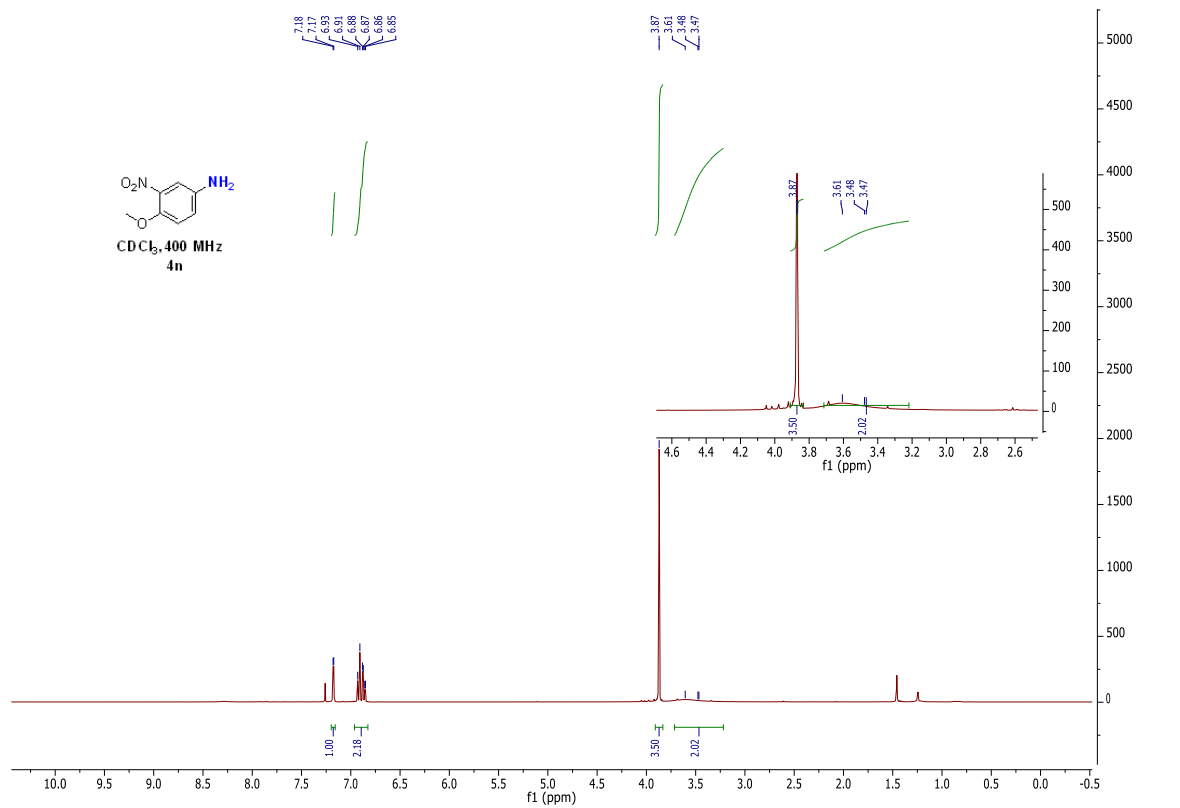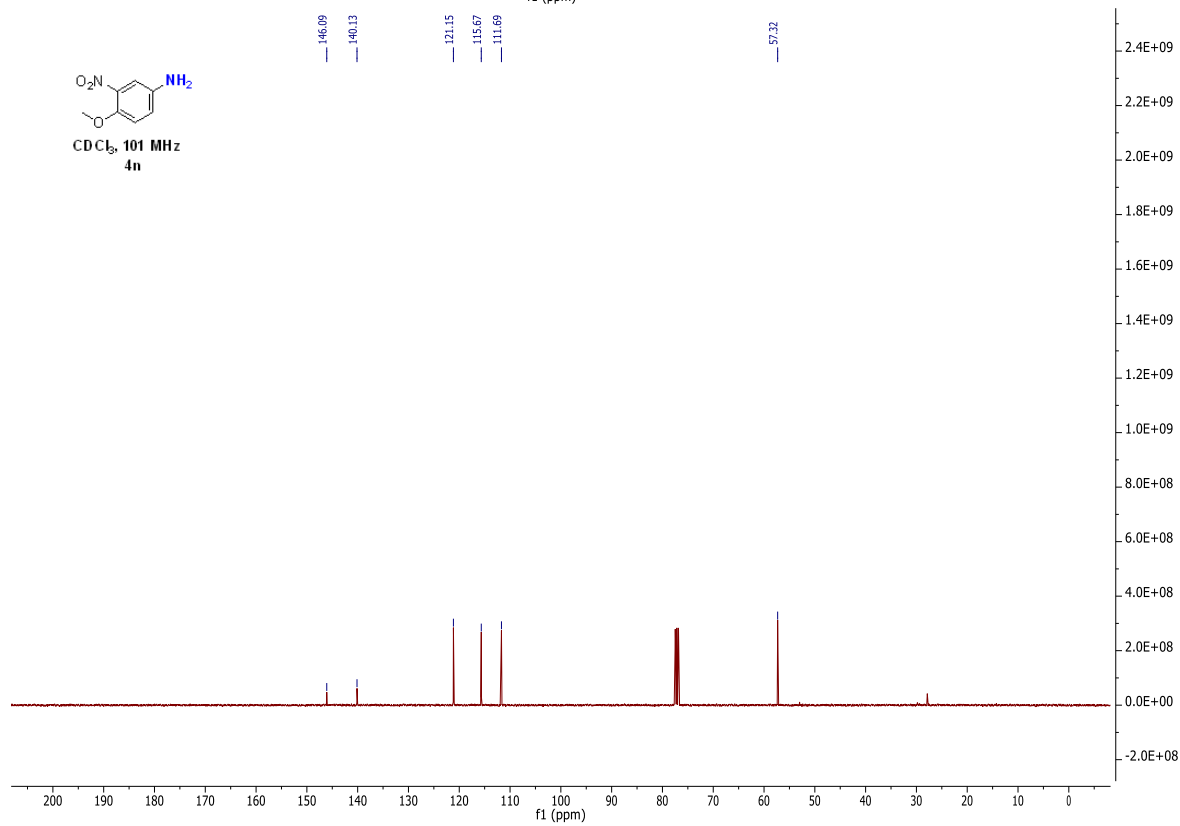

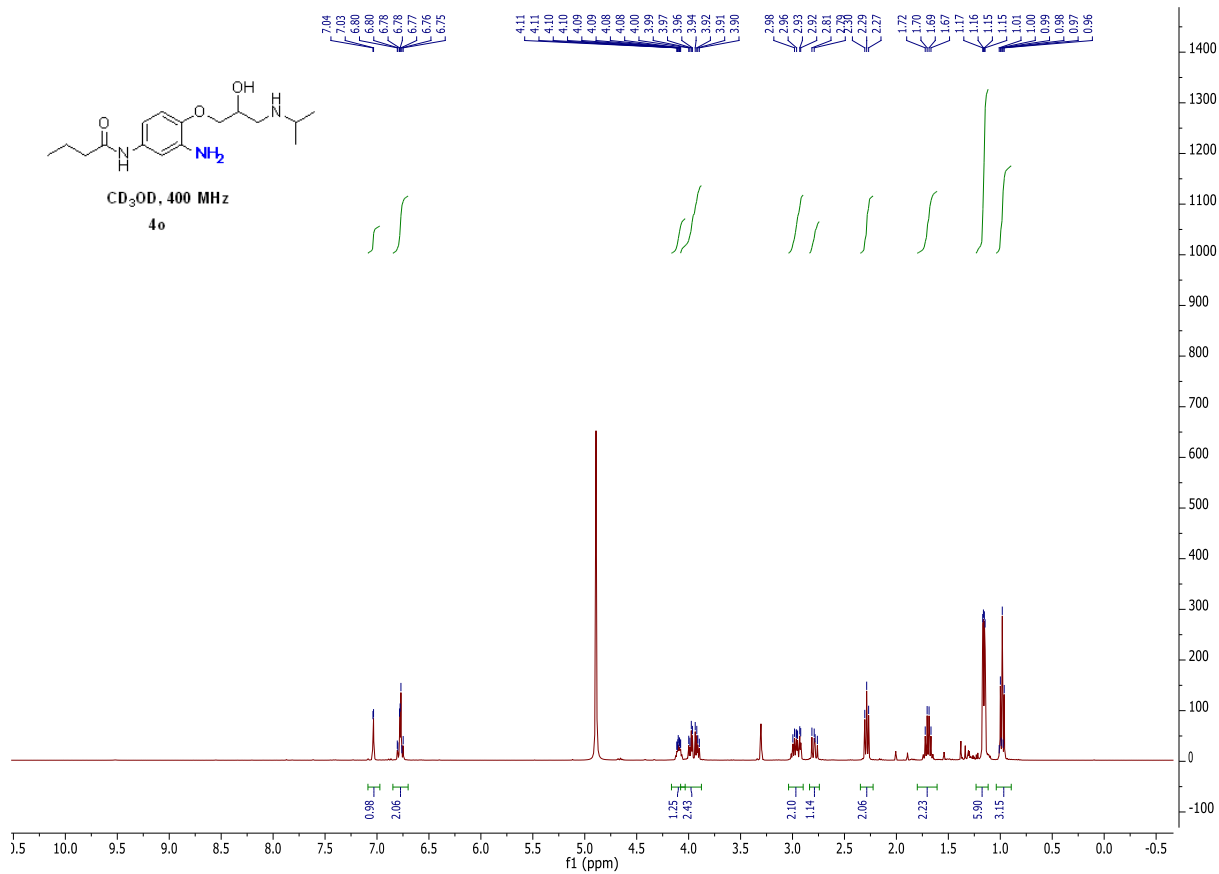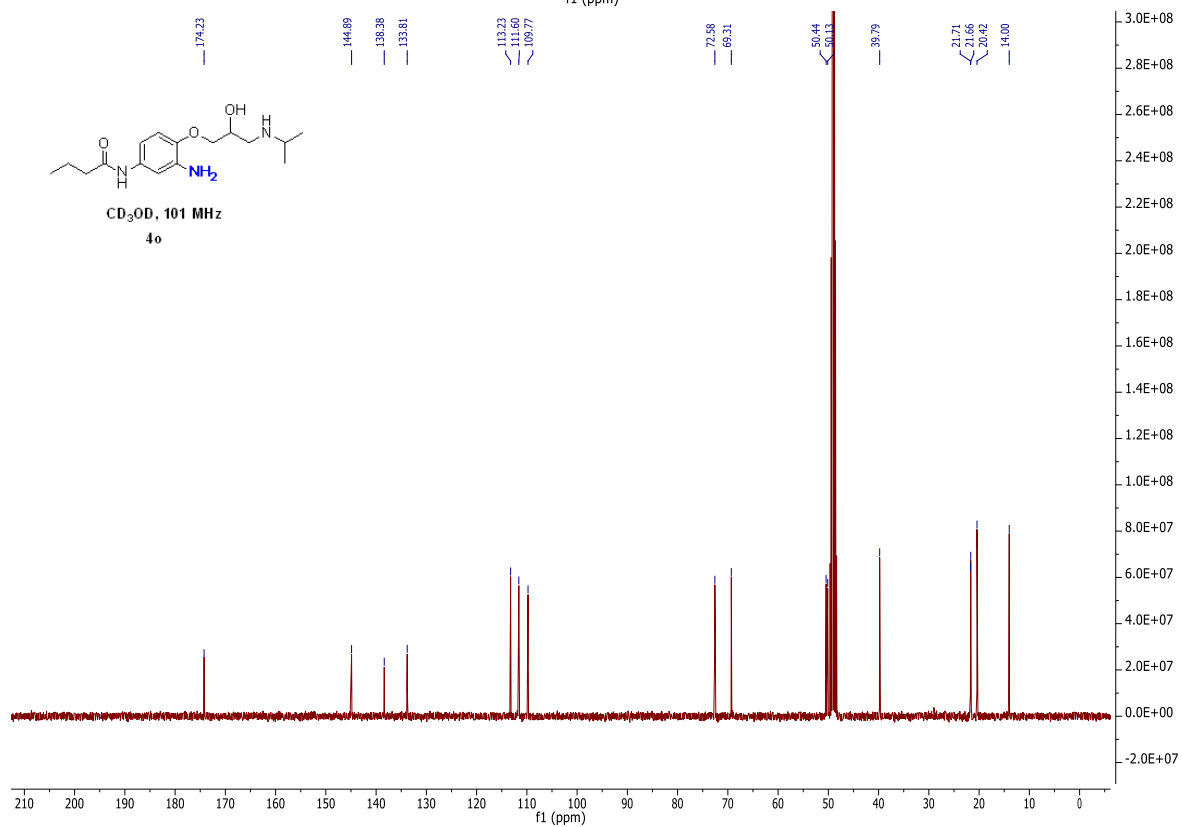



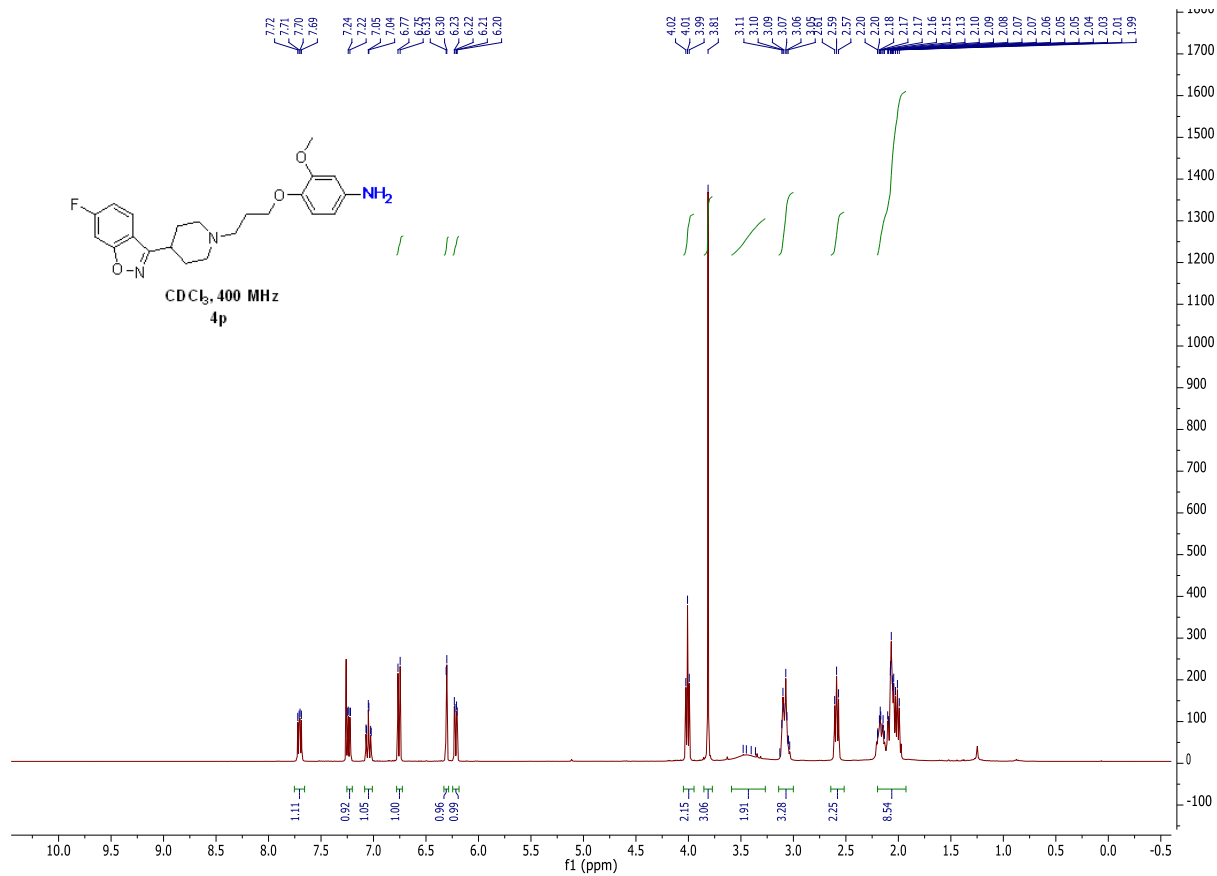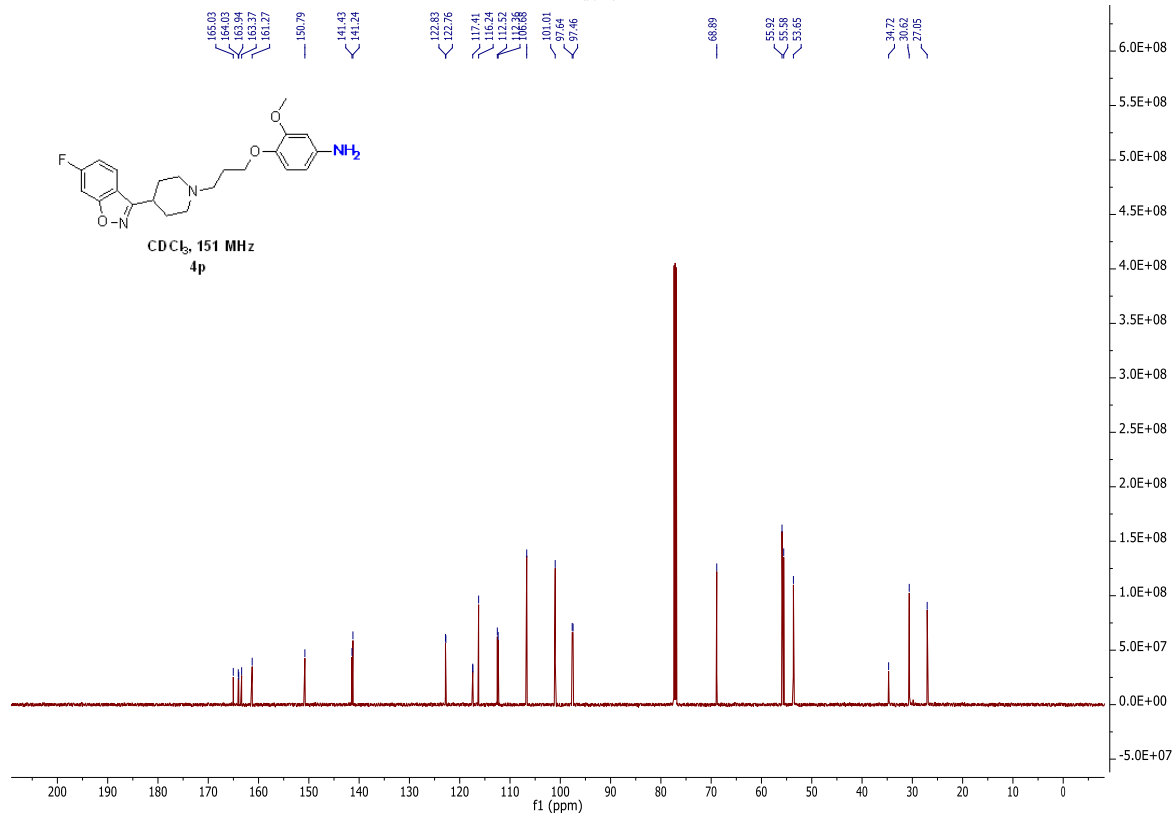

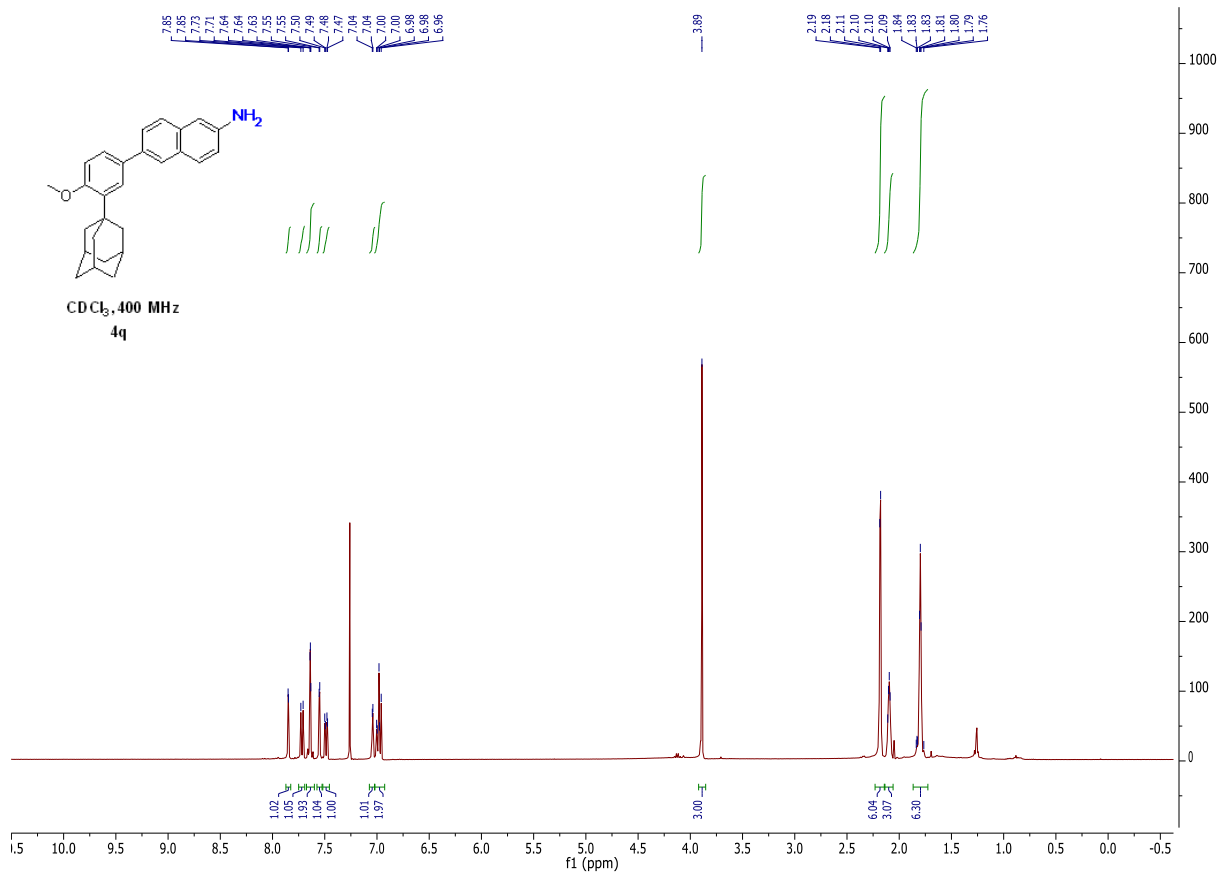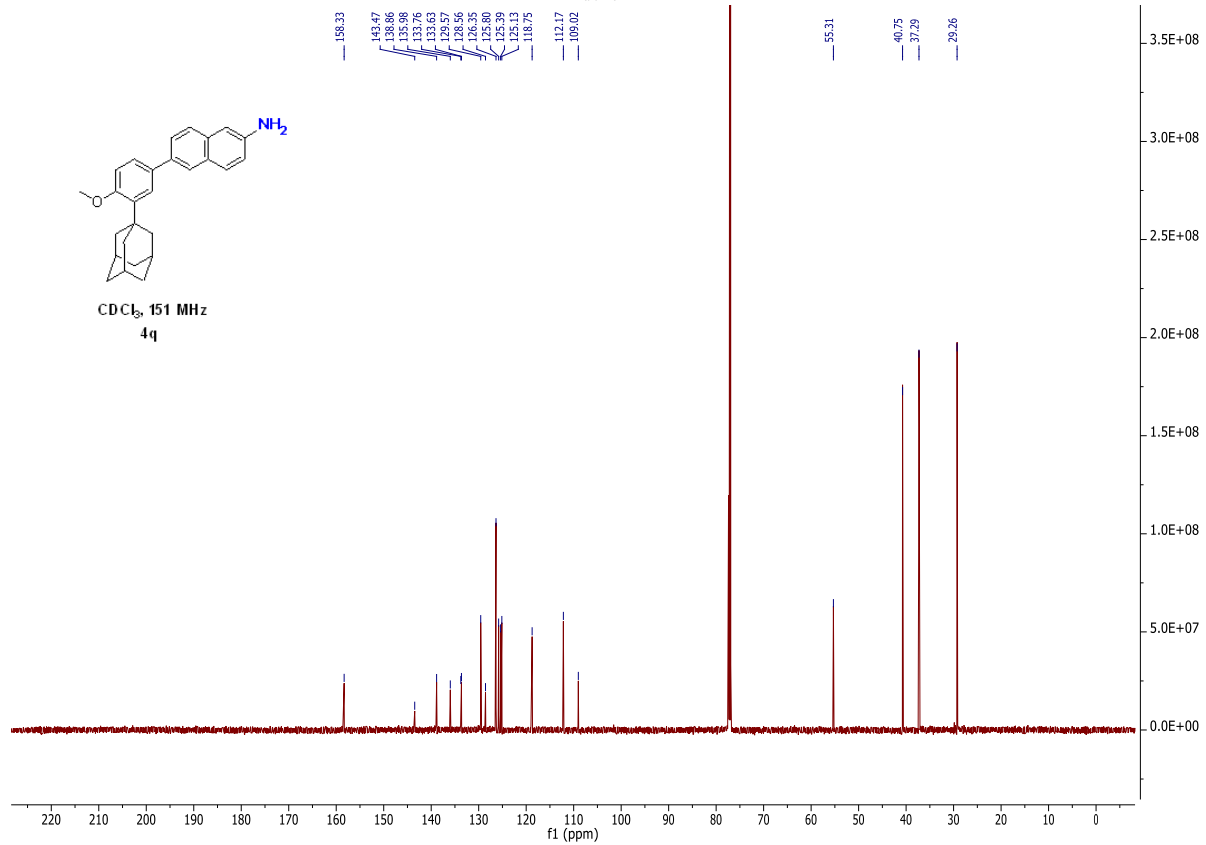

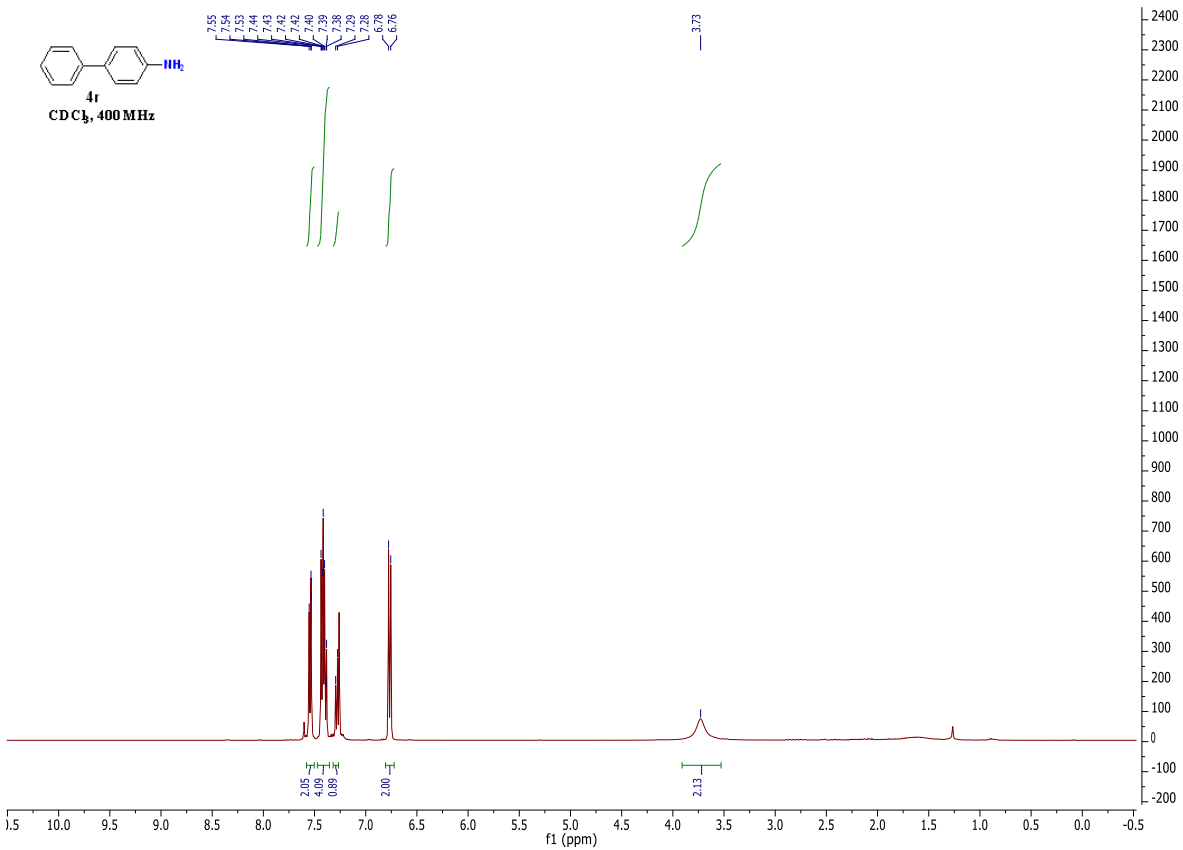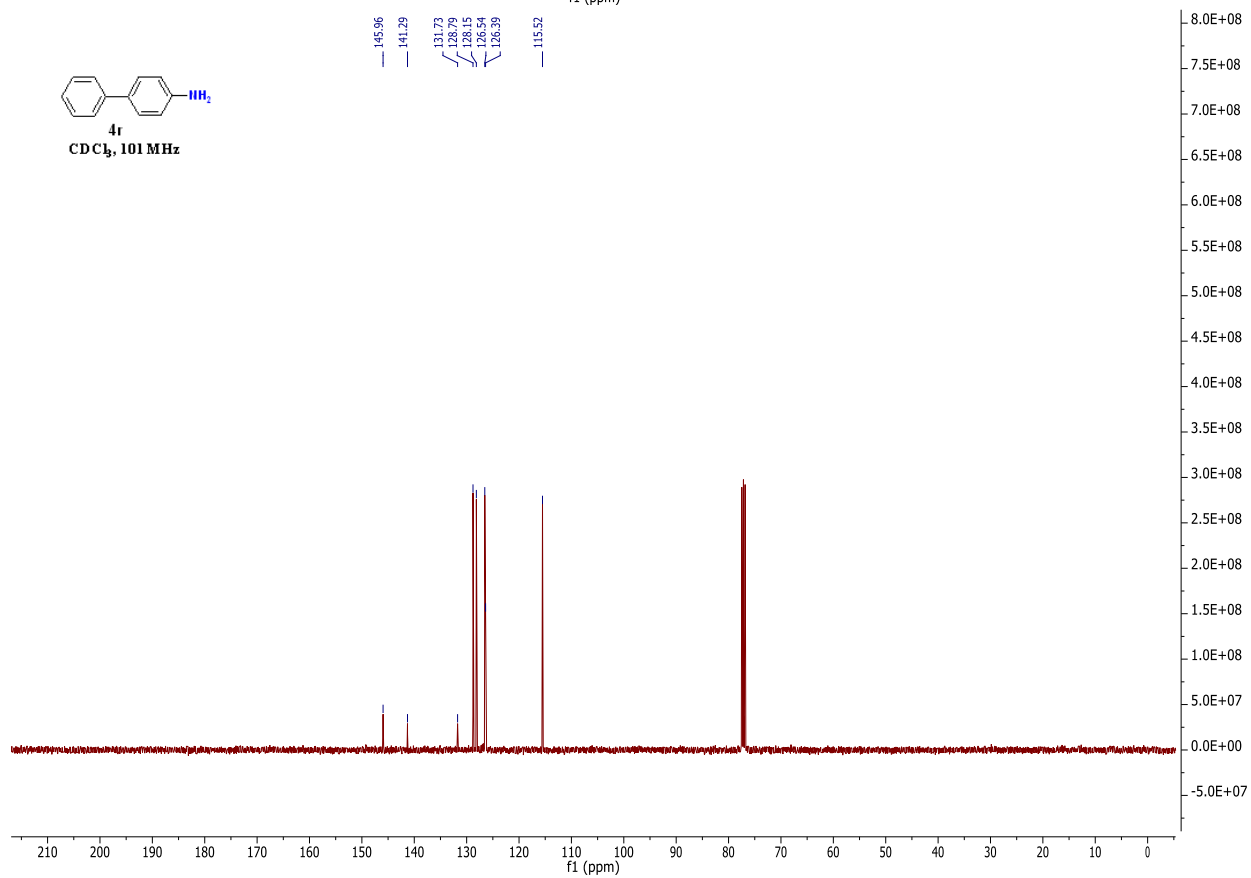

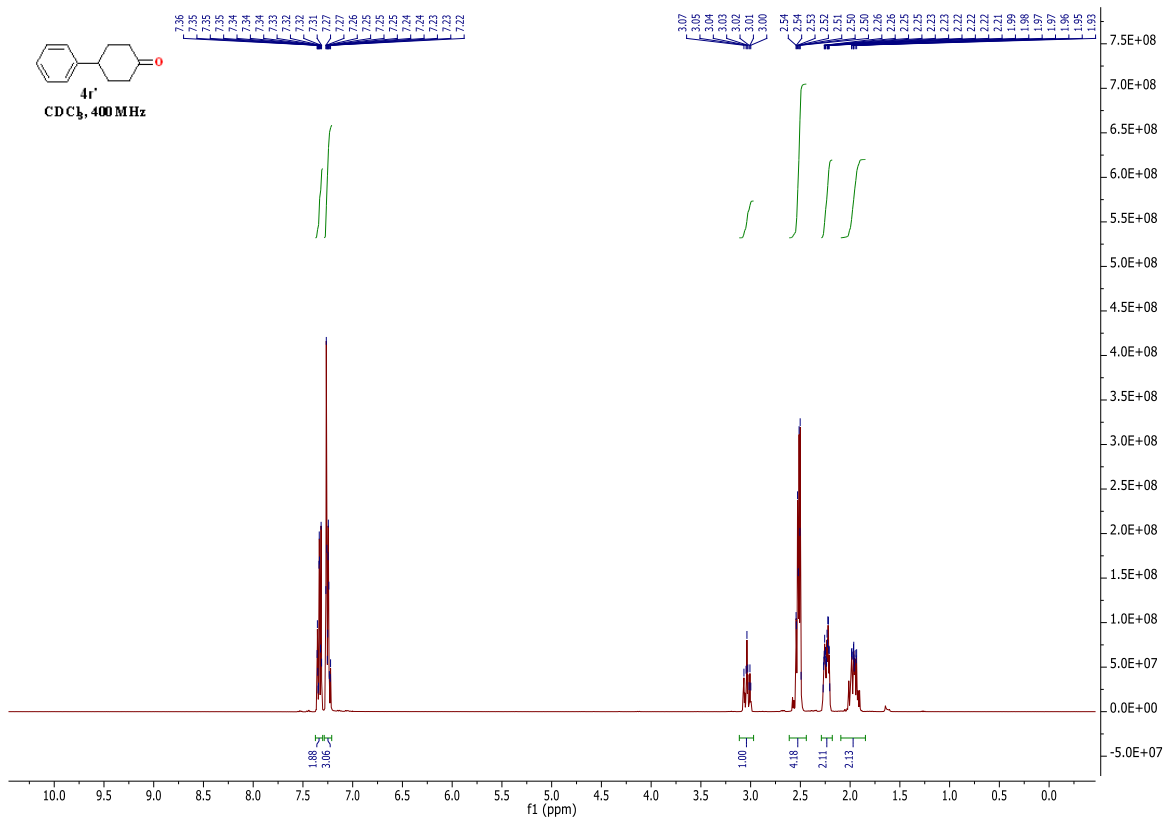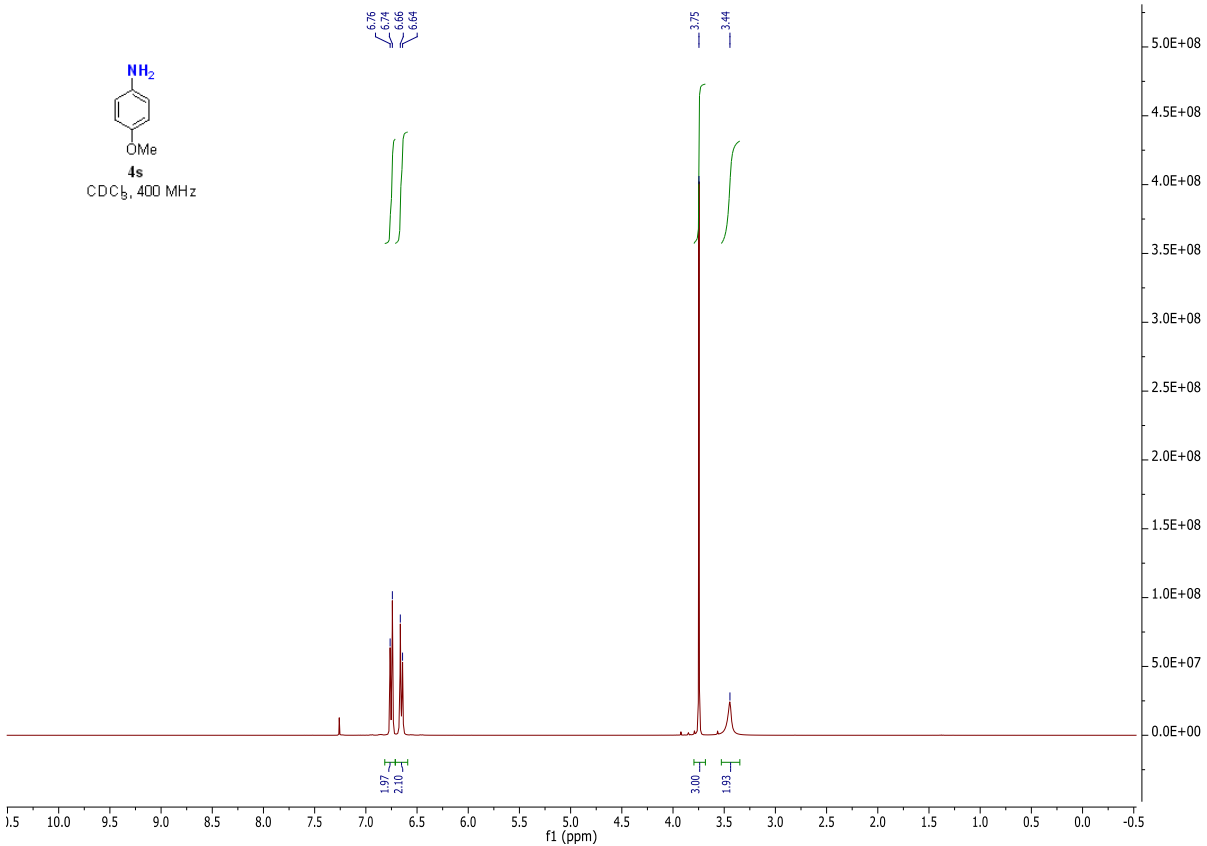

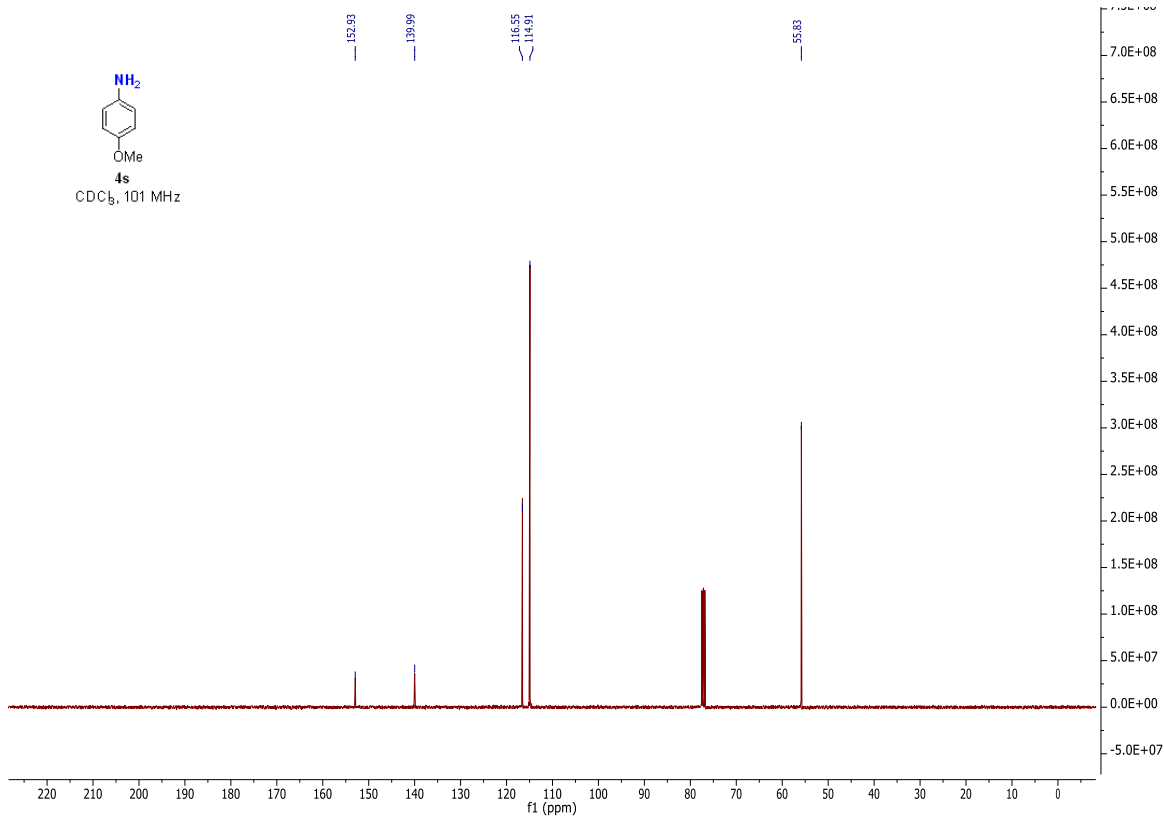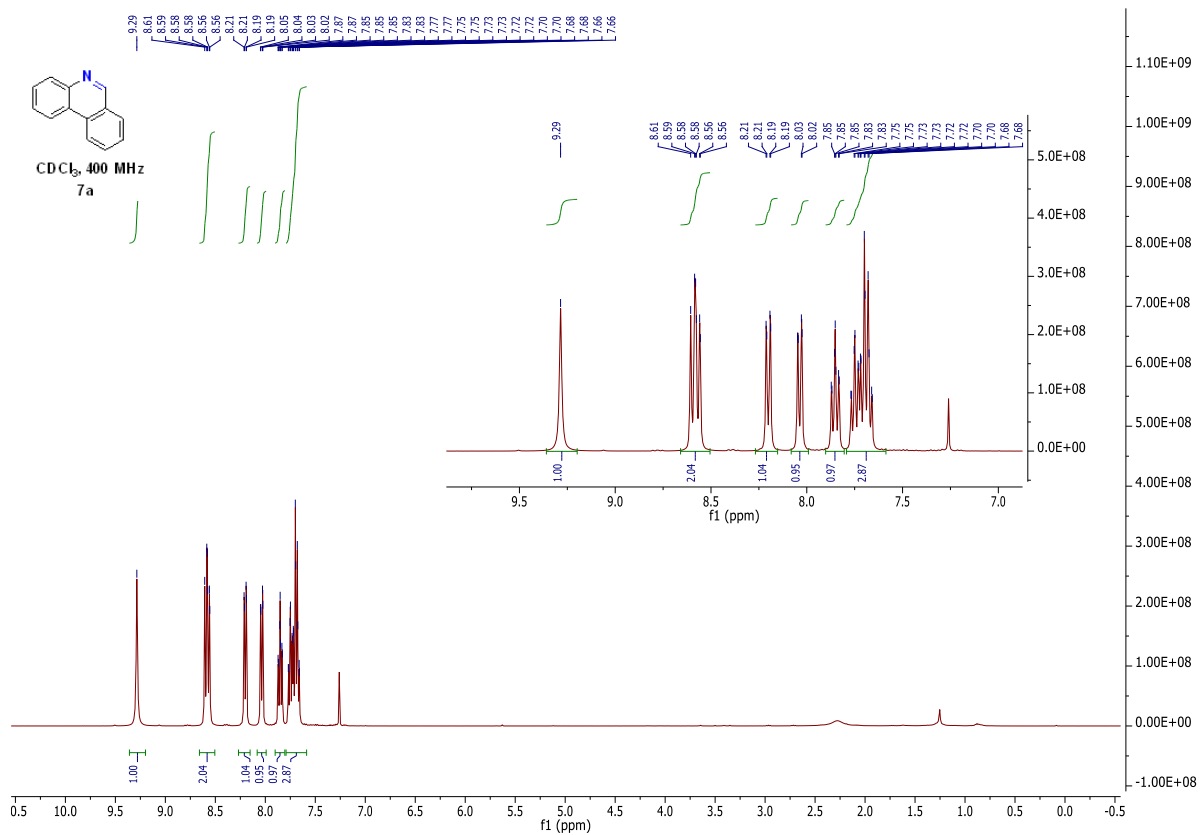

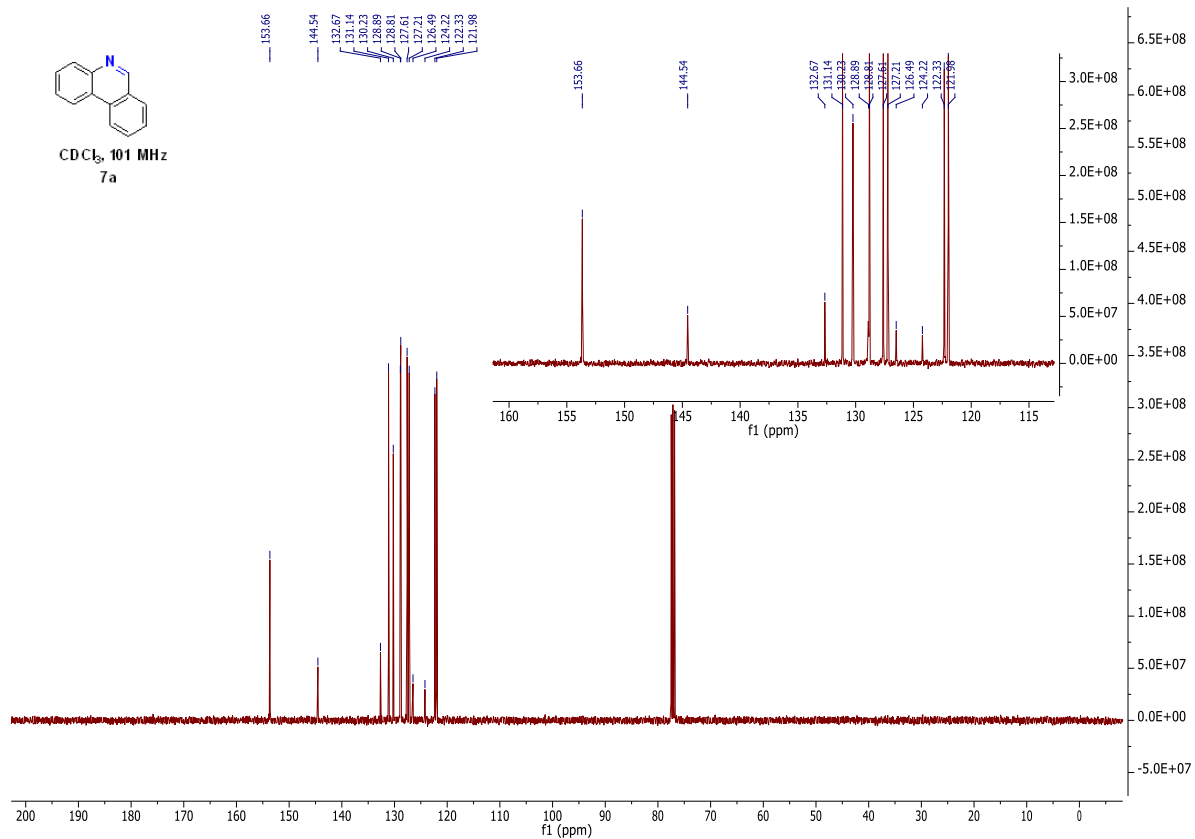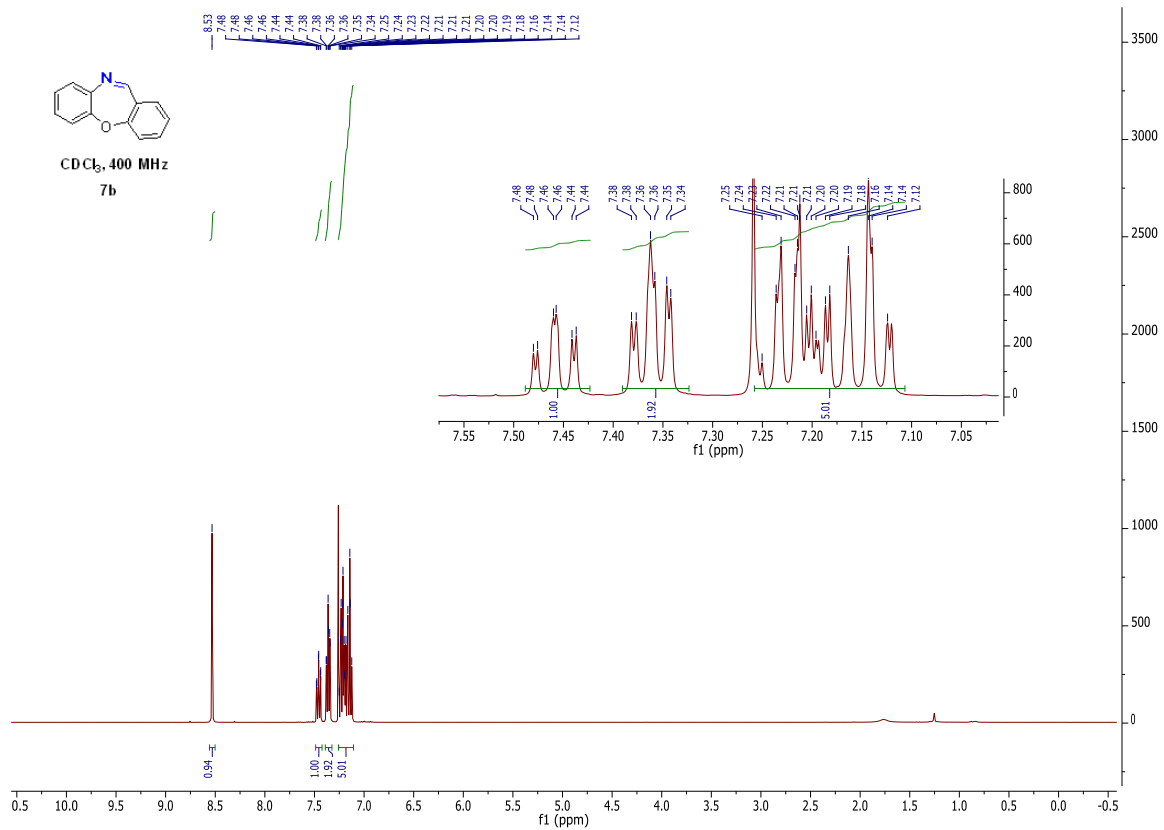

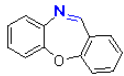

CDCl<sub>3</sub>, 101 MHz  
7b

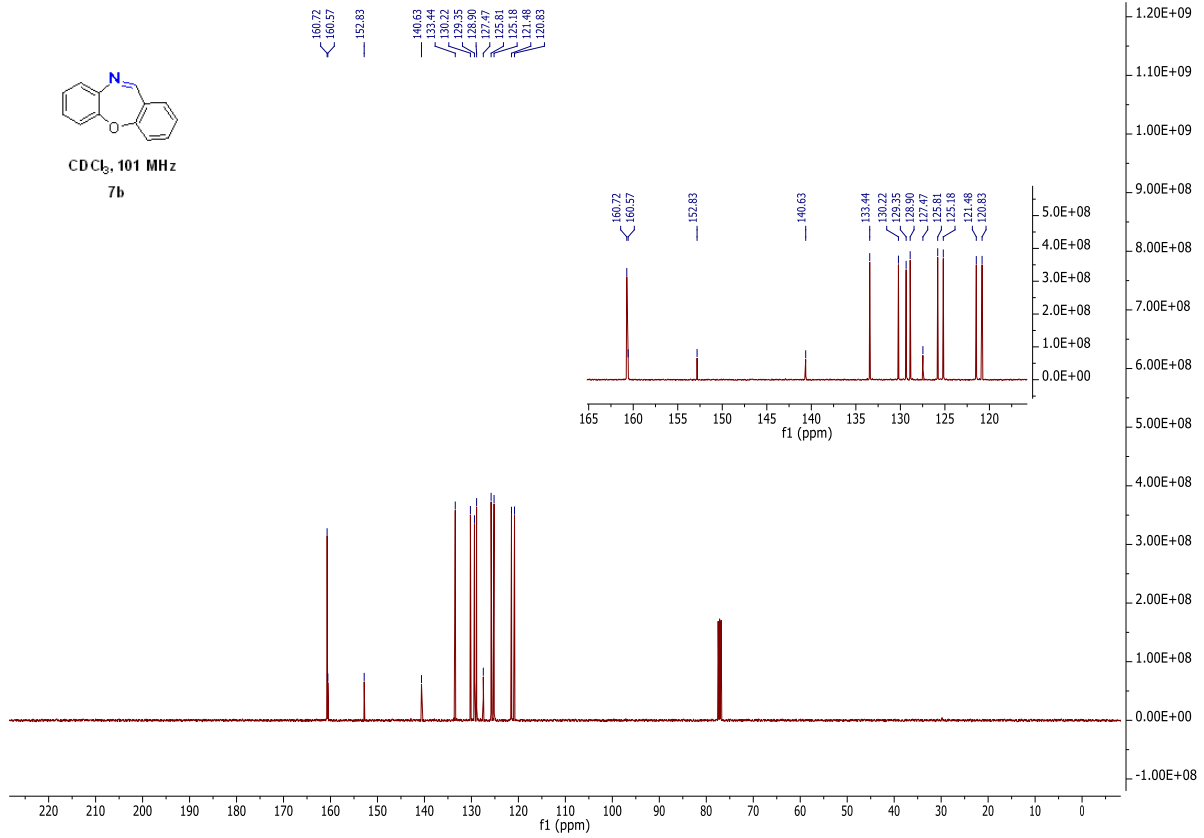

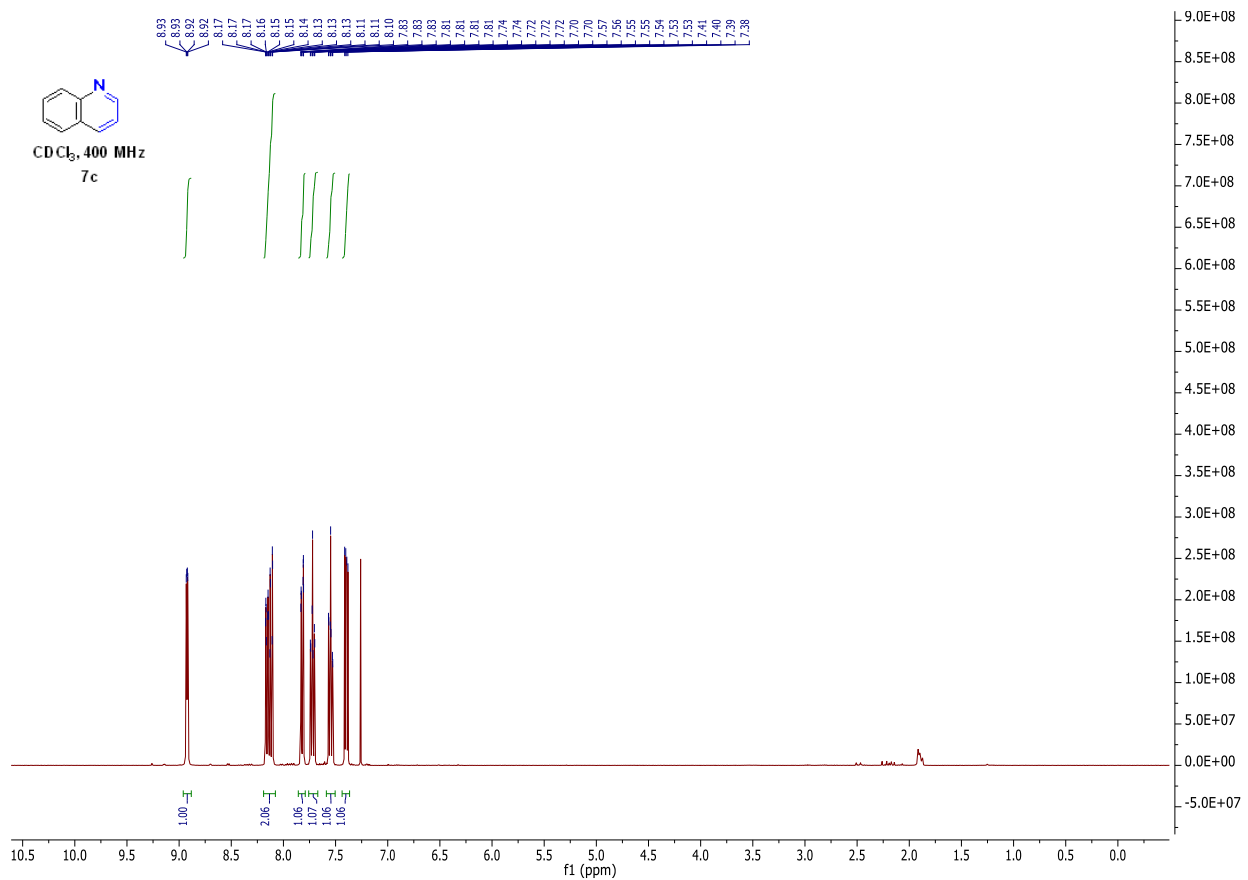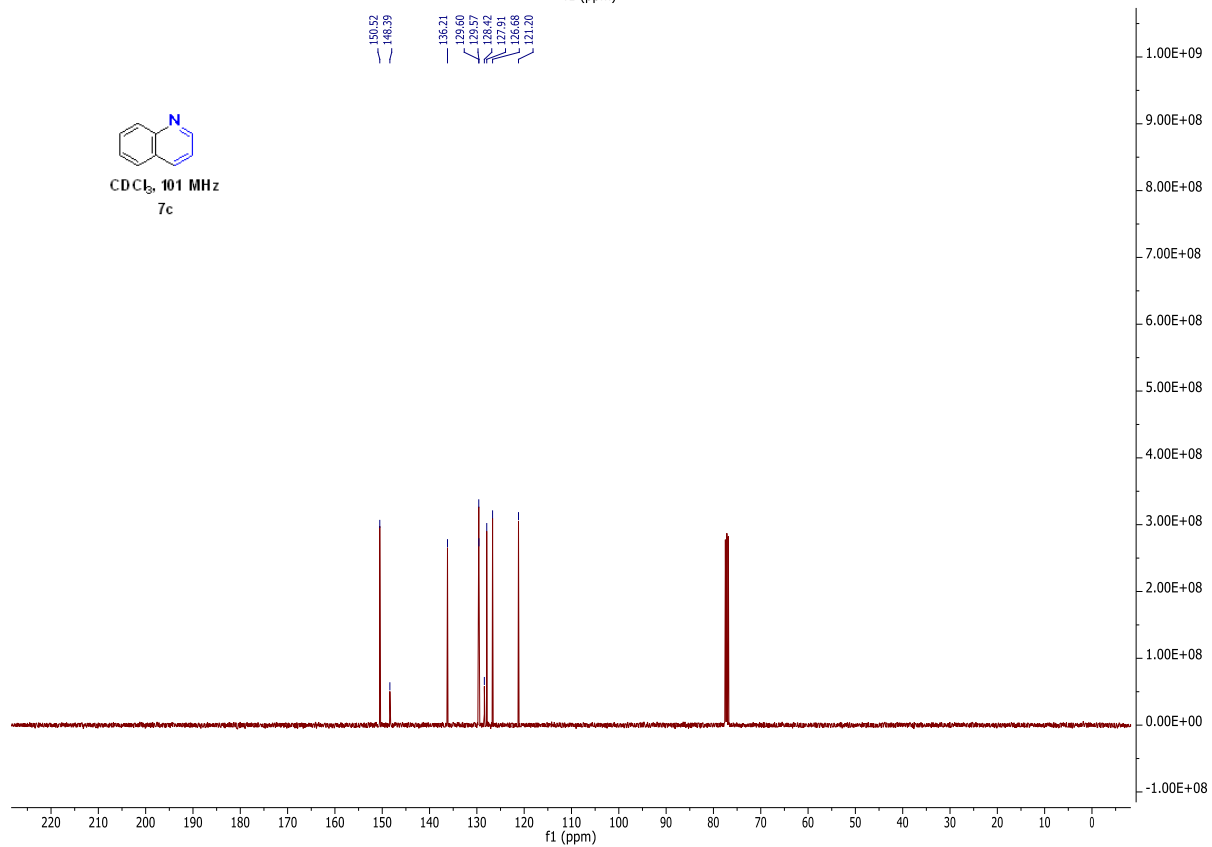



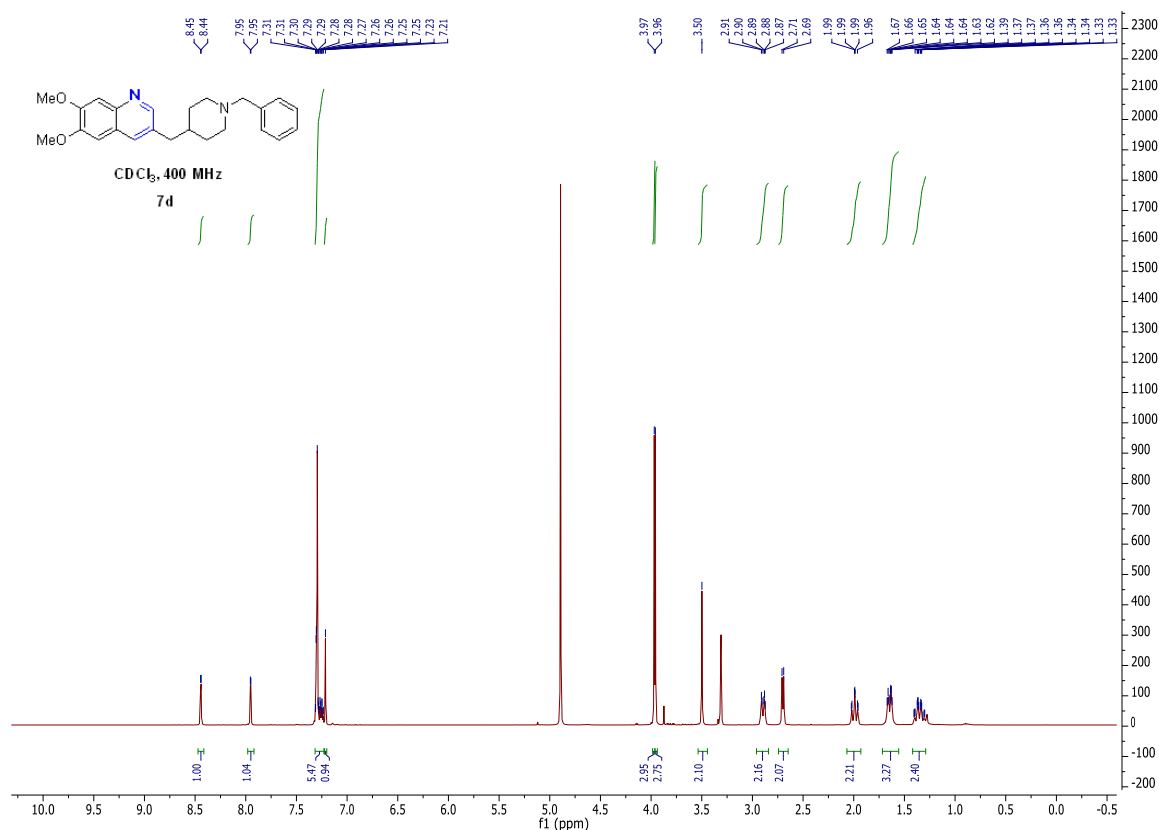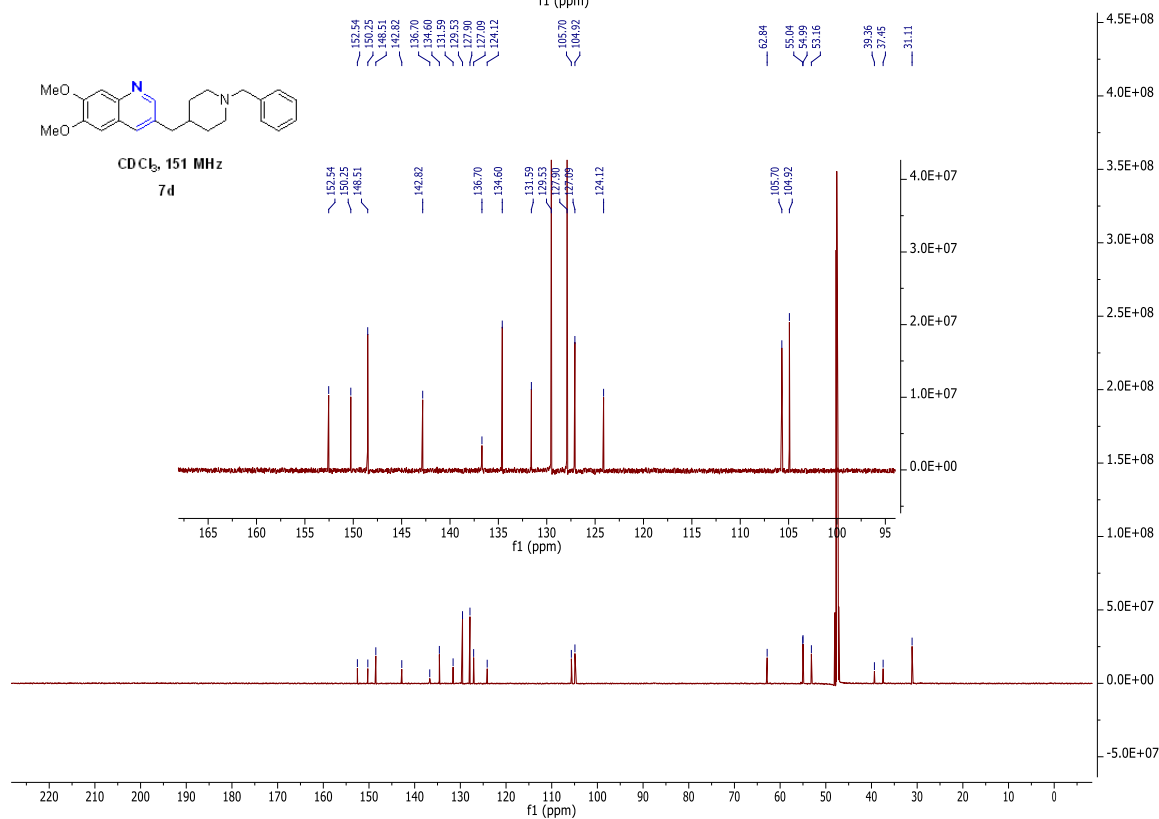

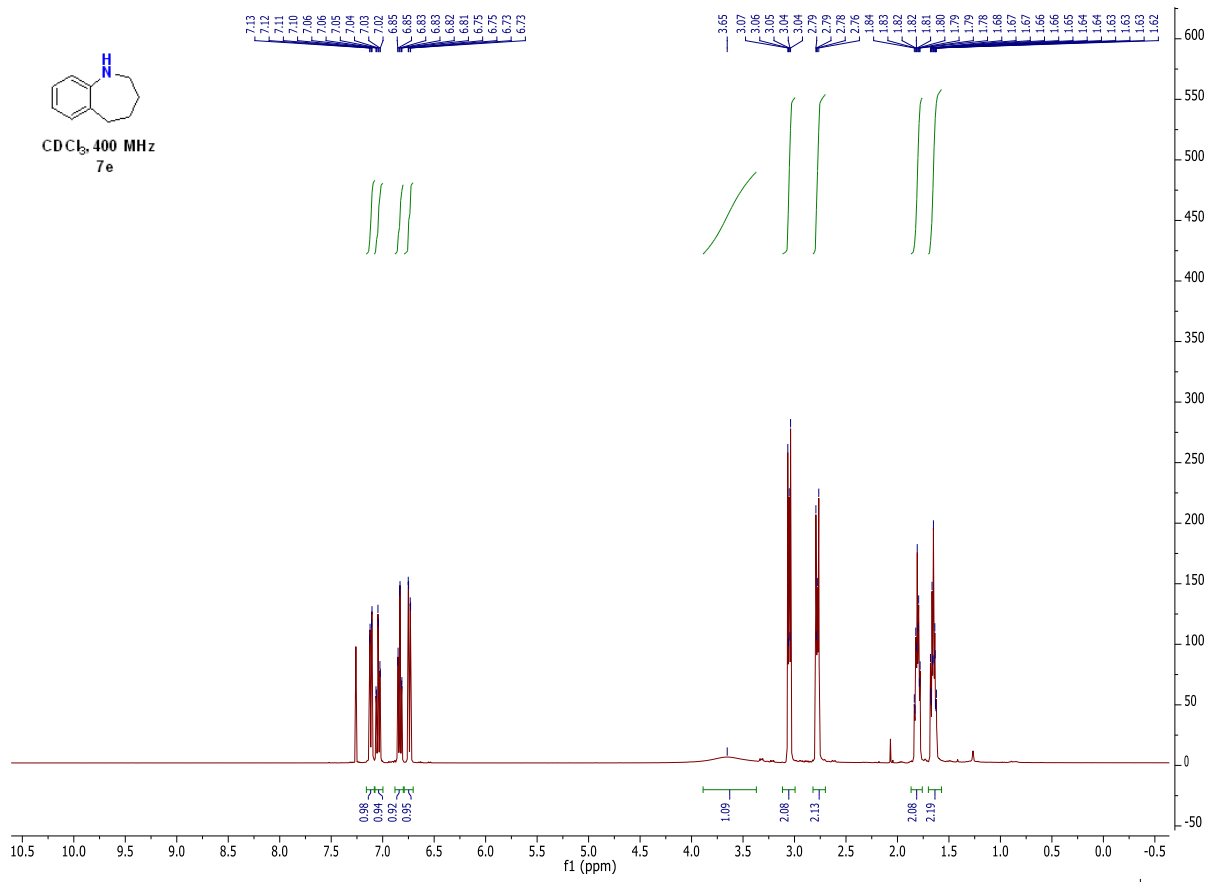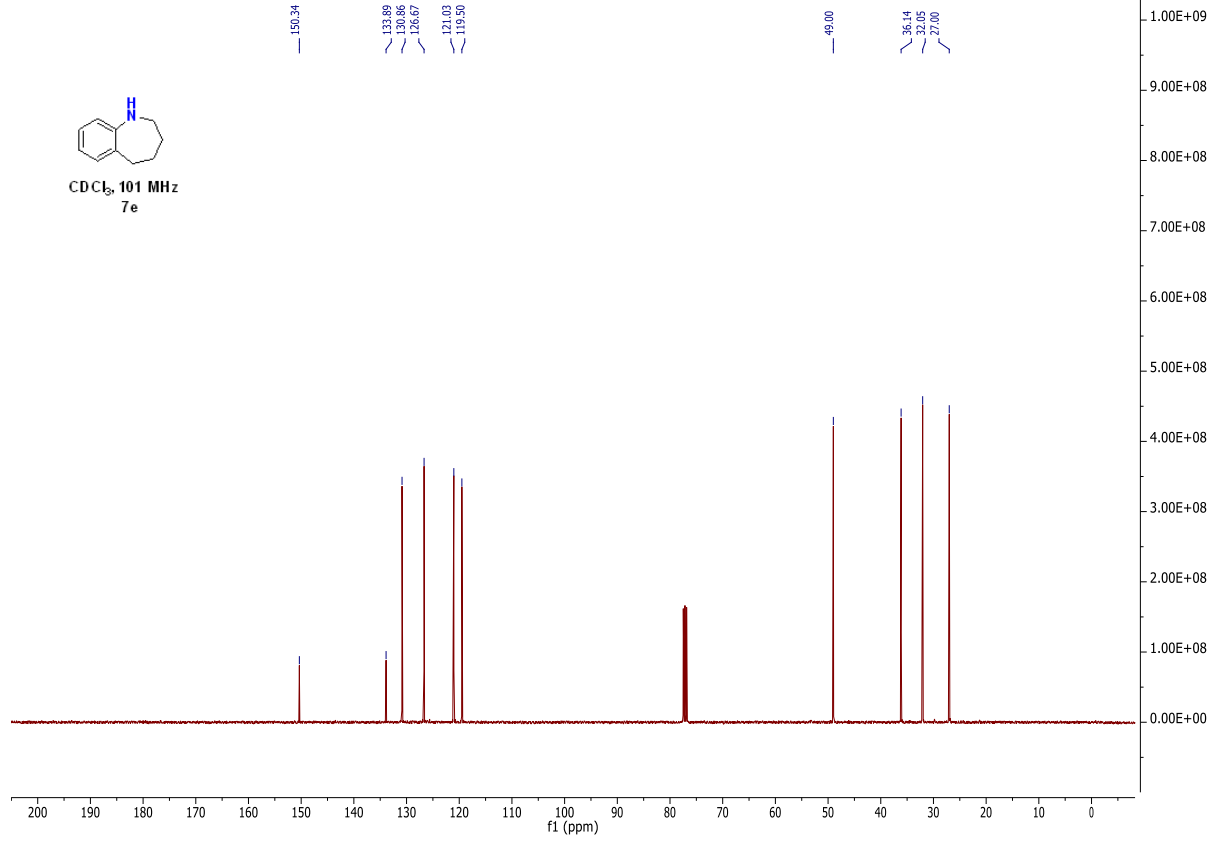

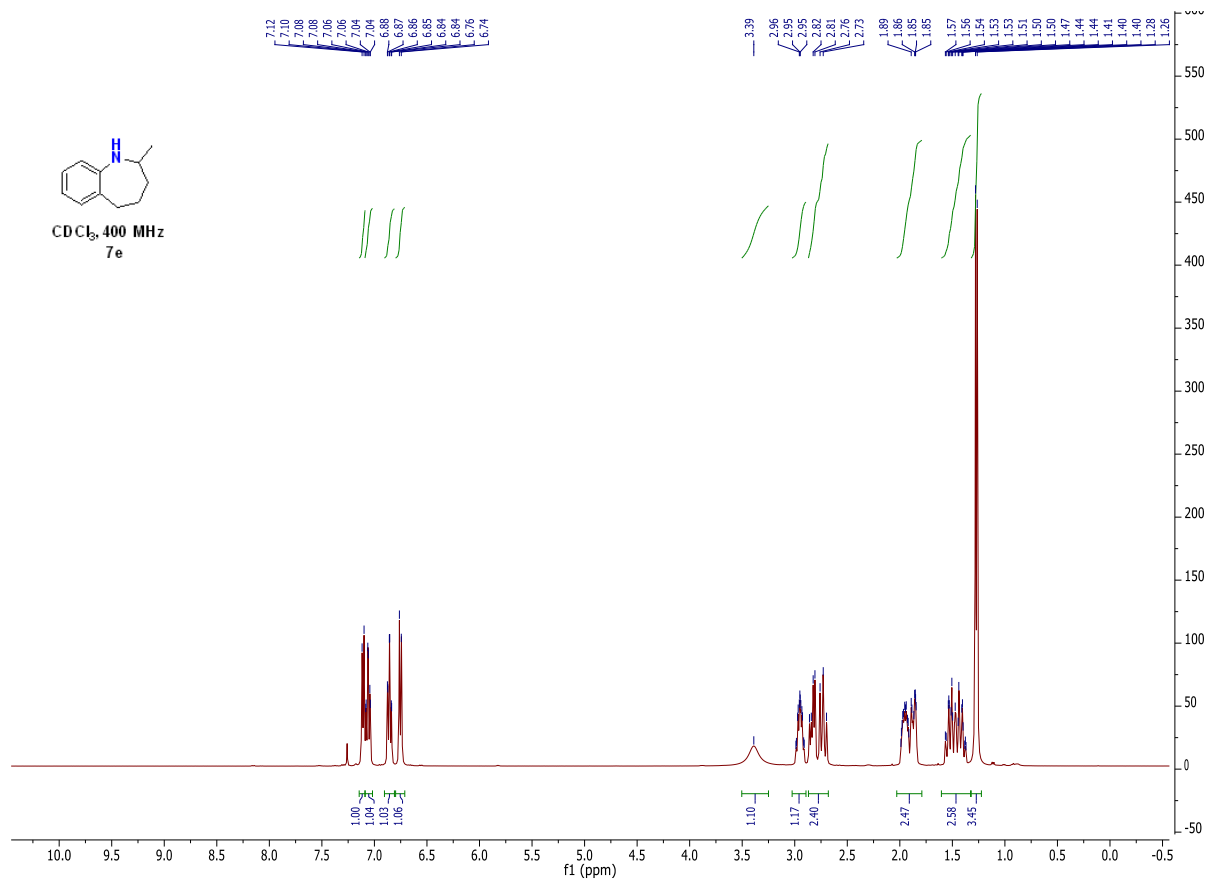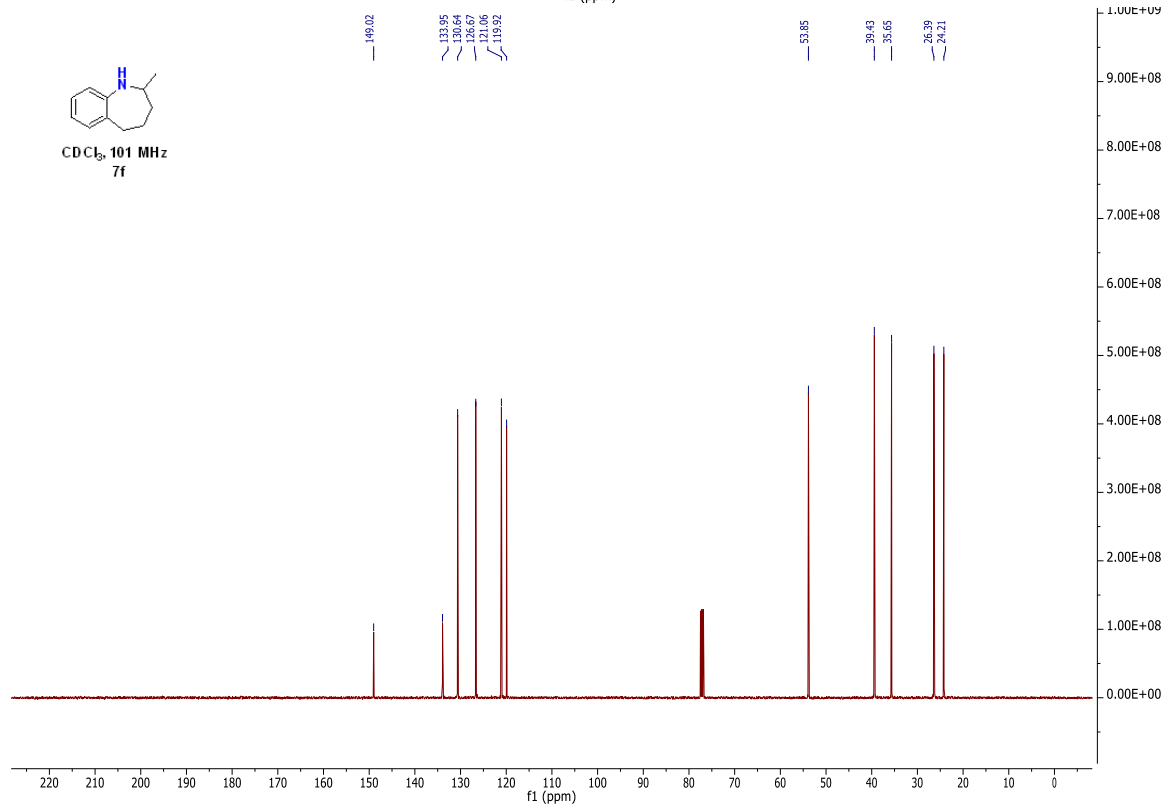

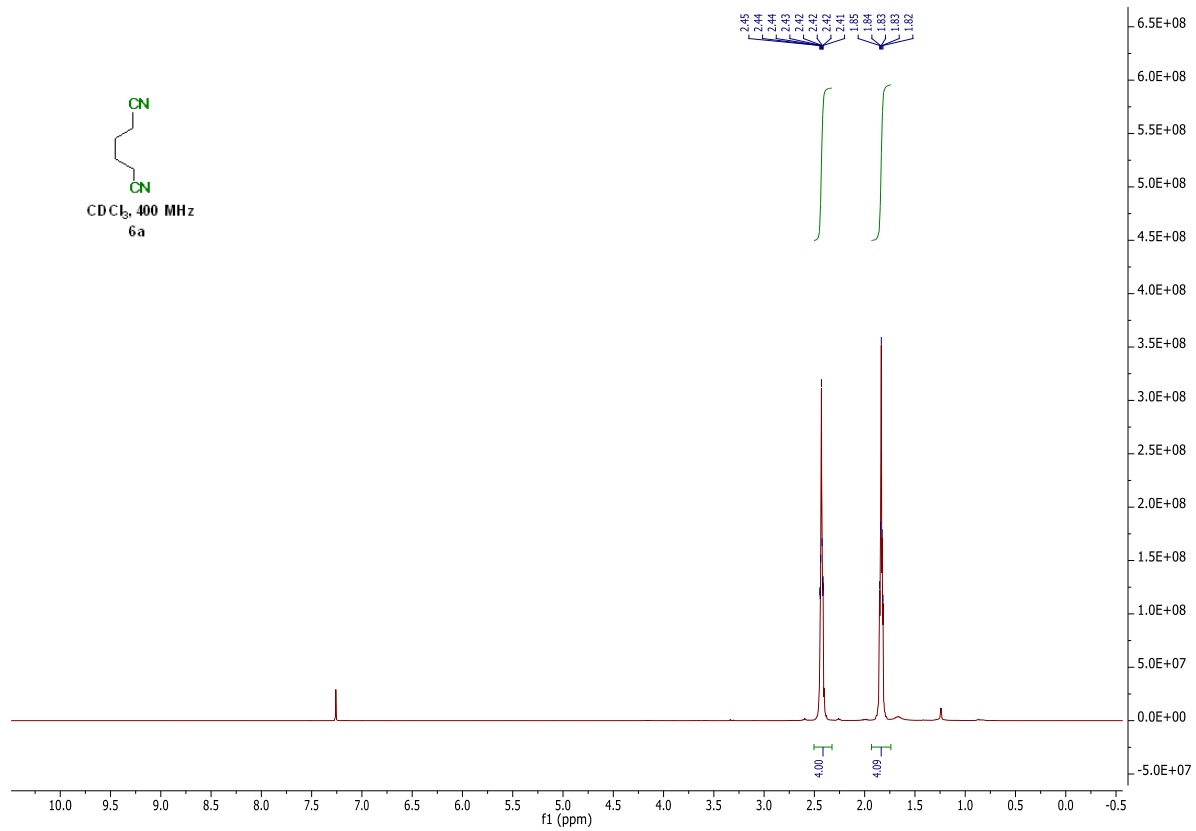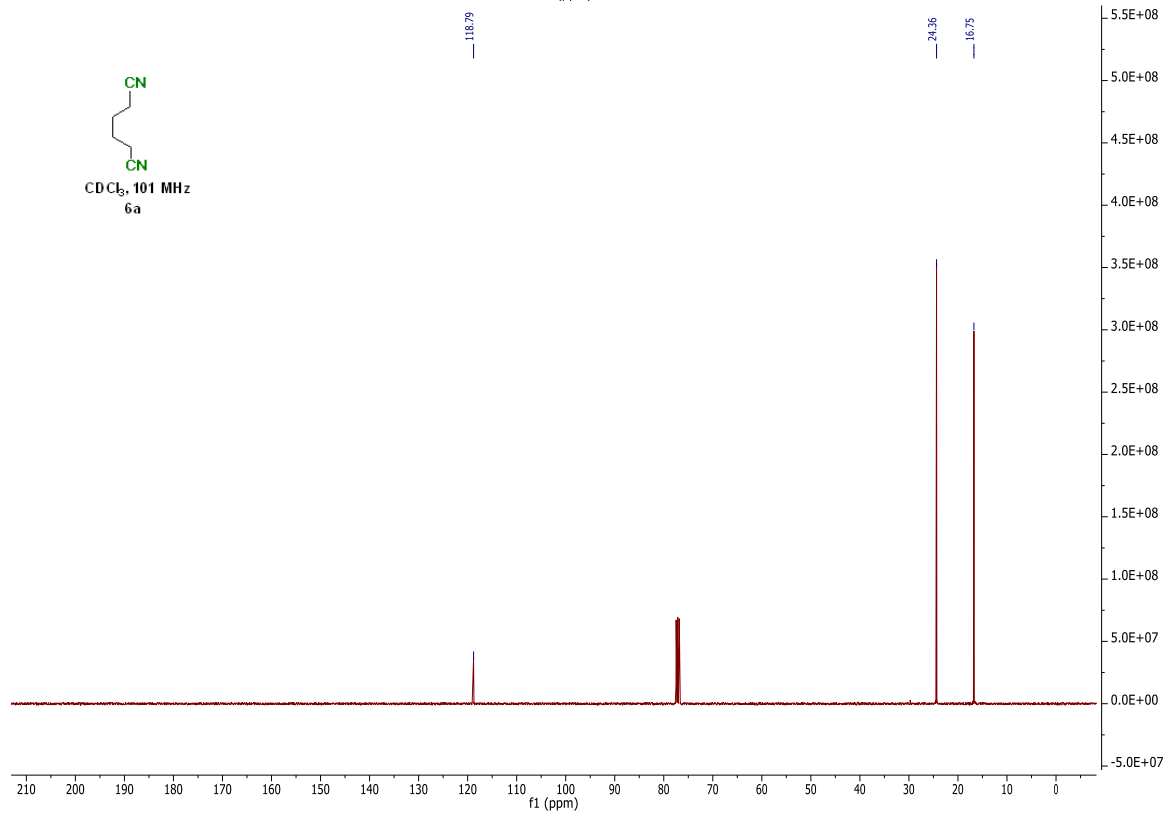

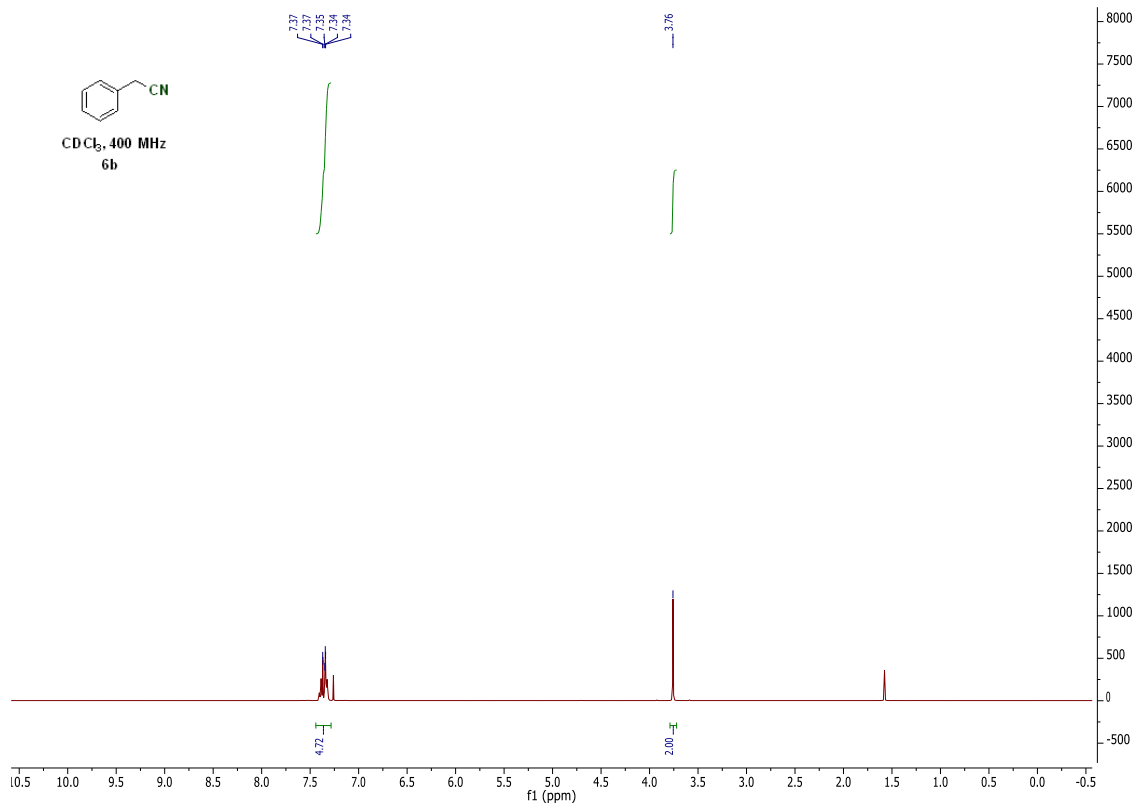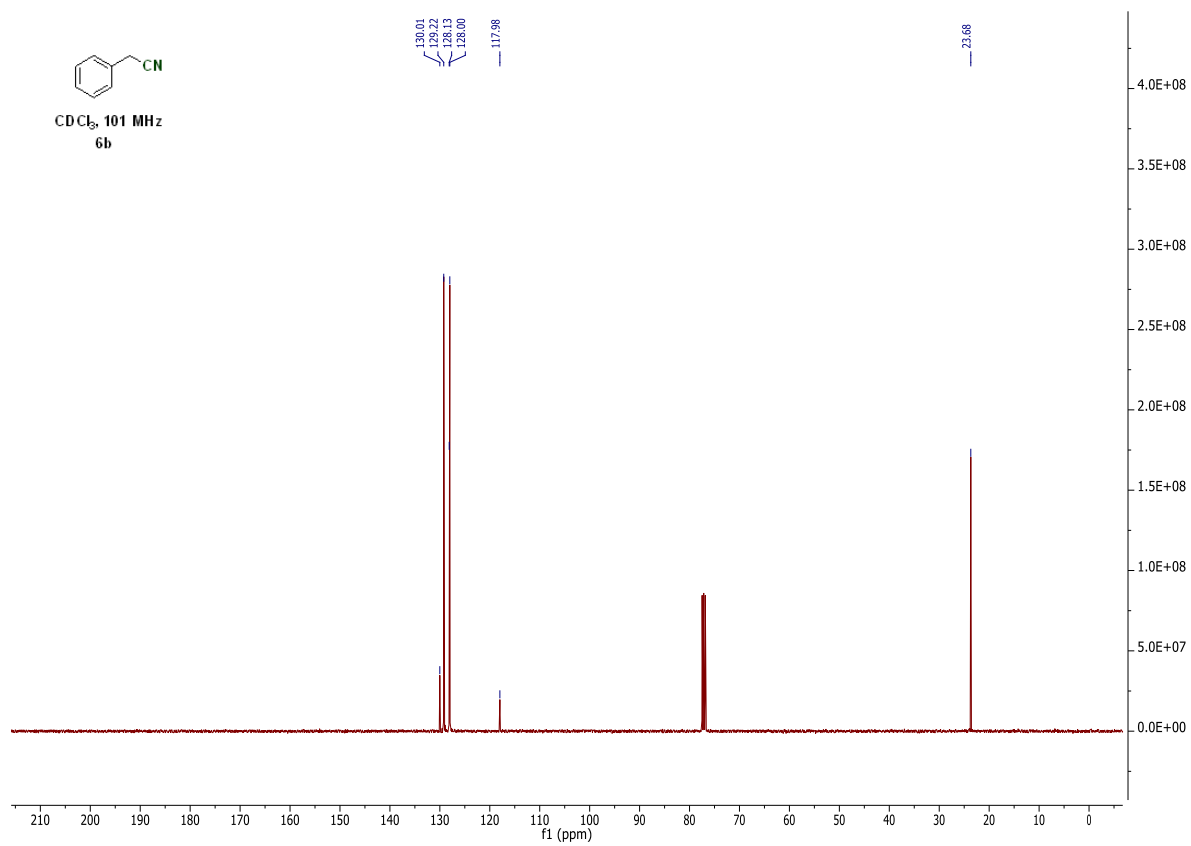

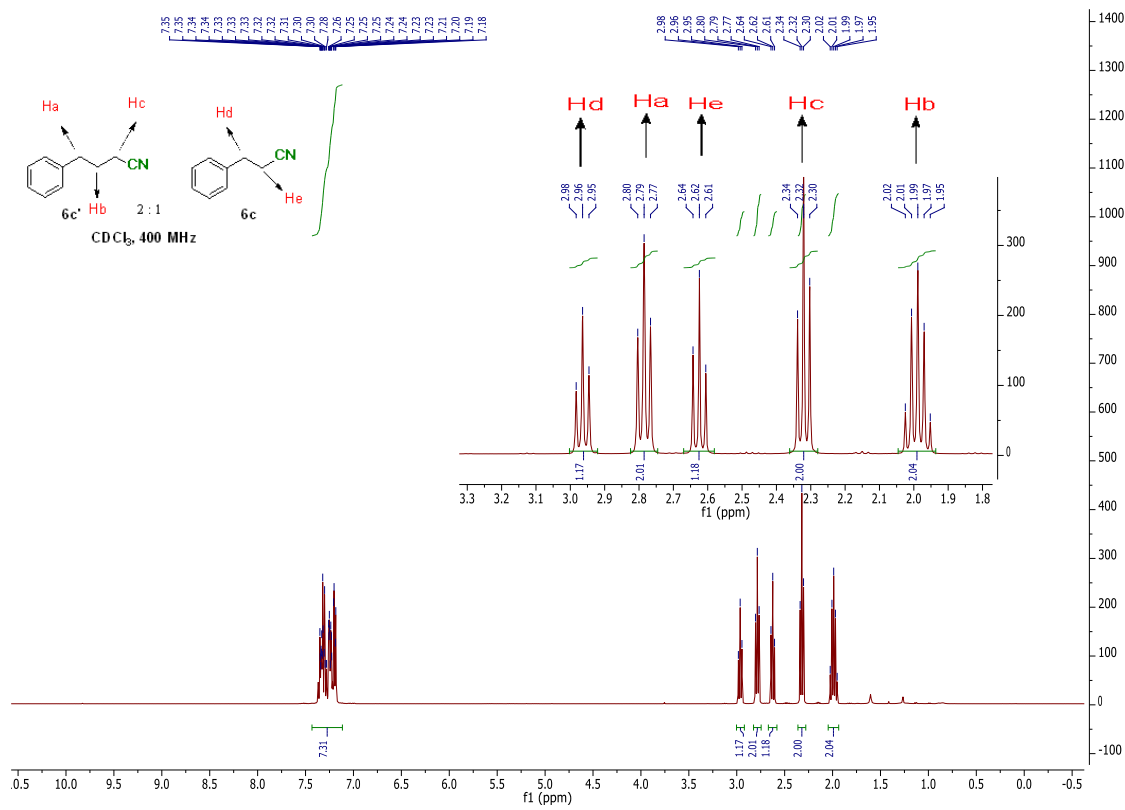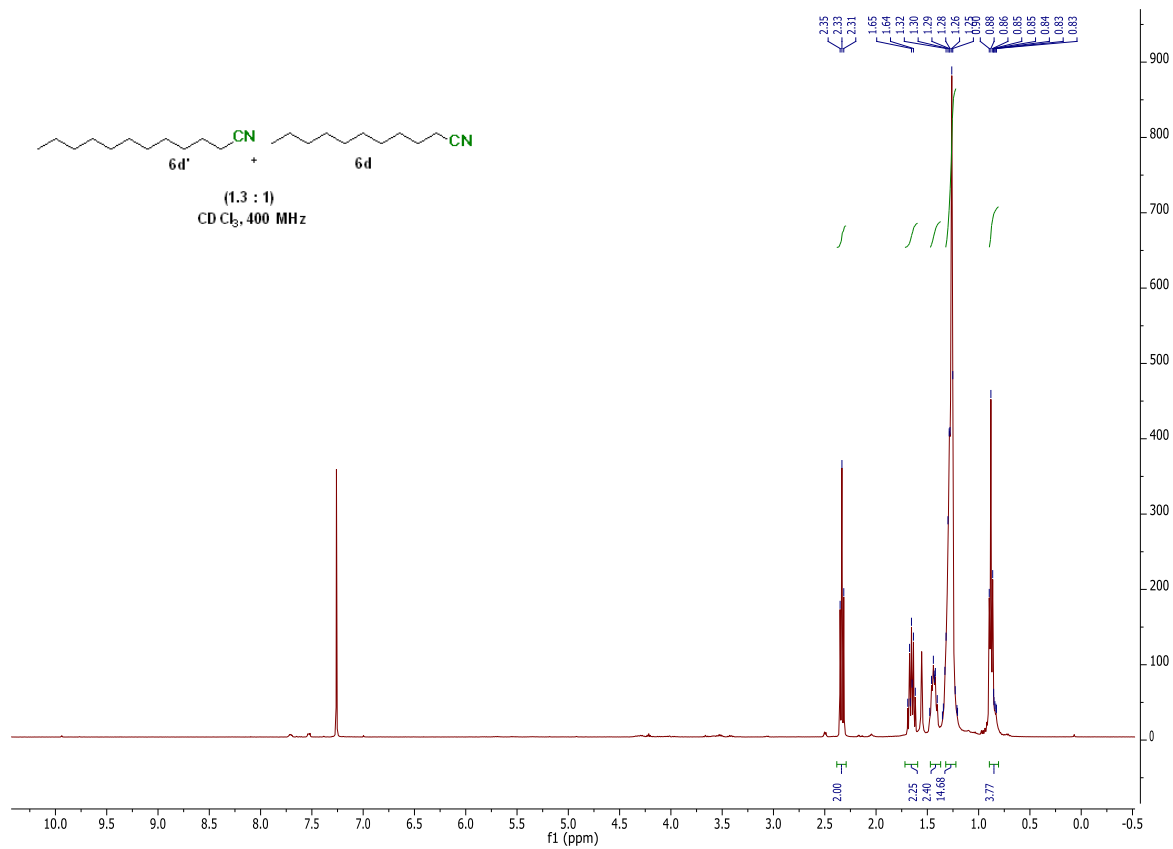

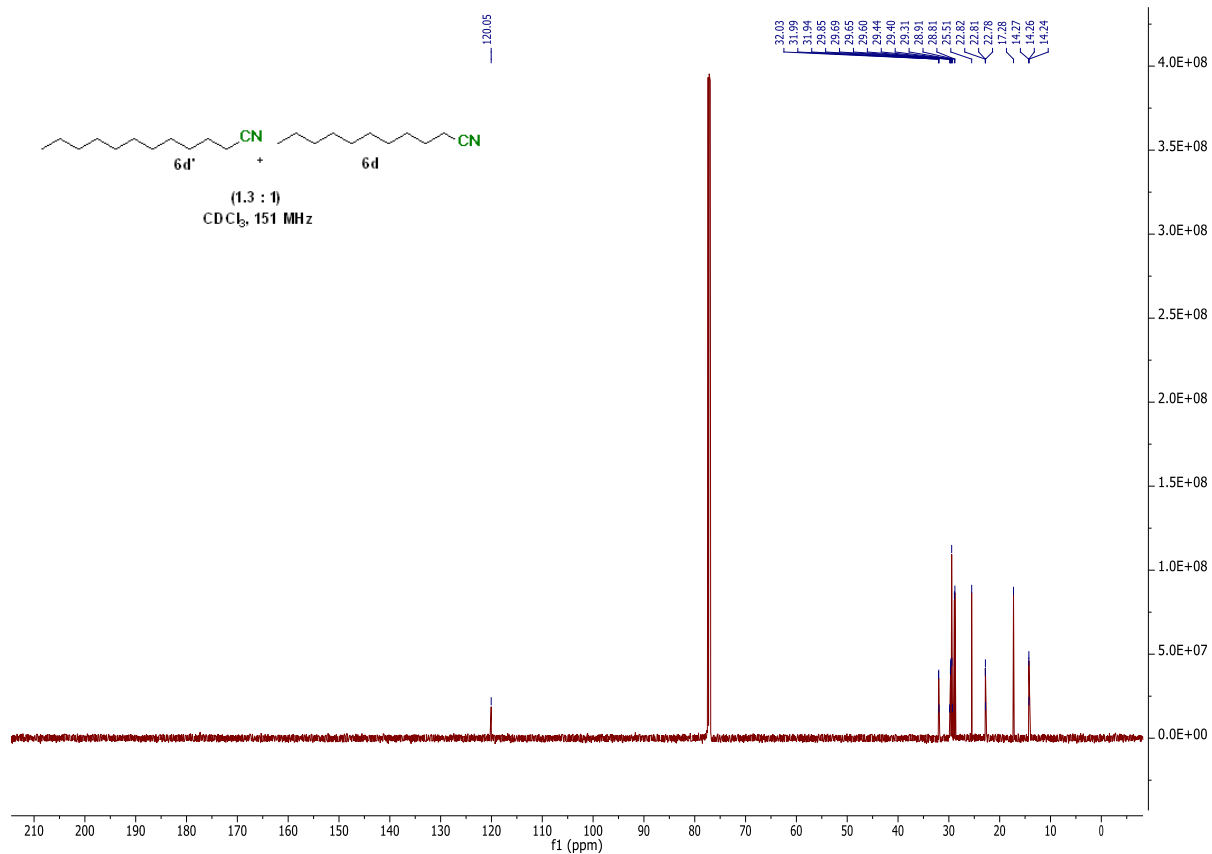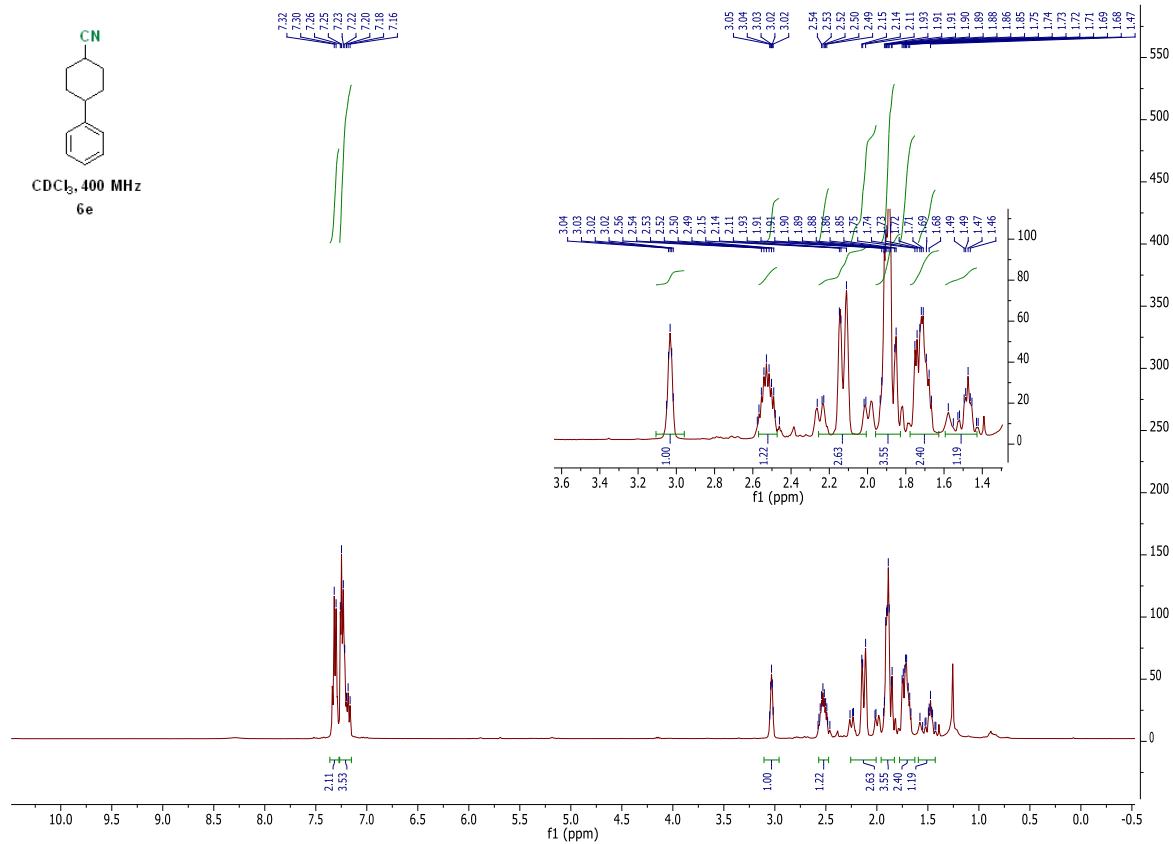

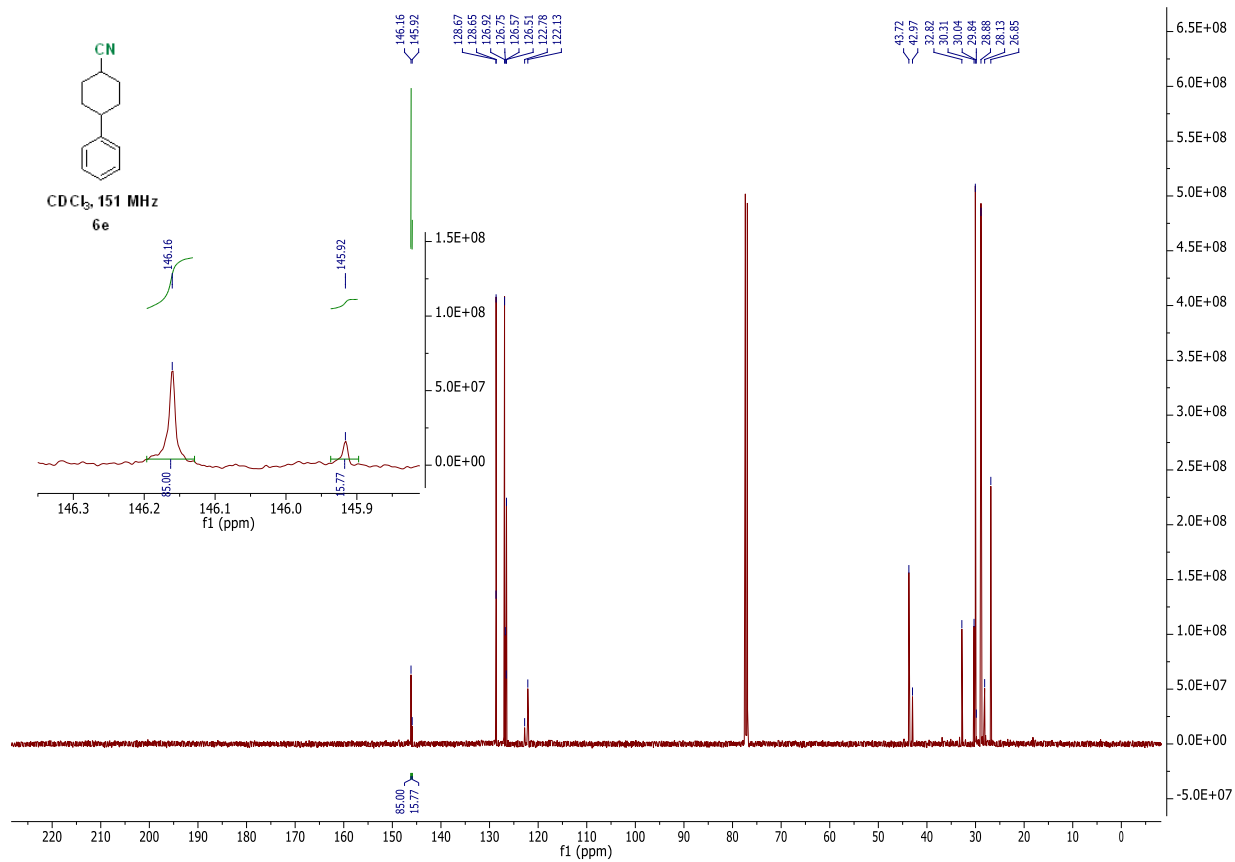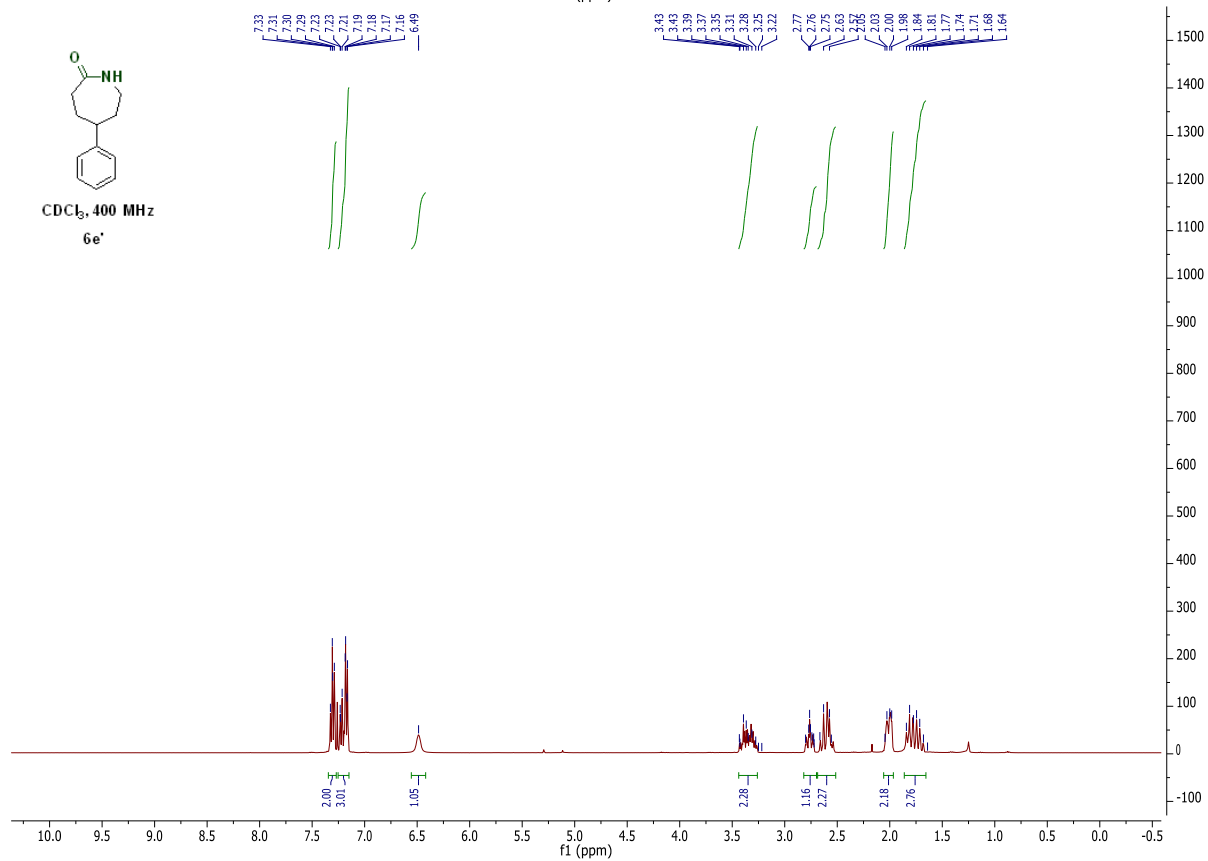



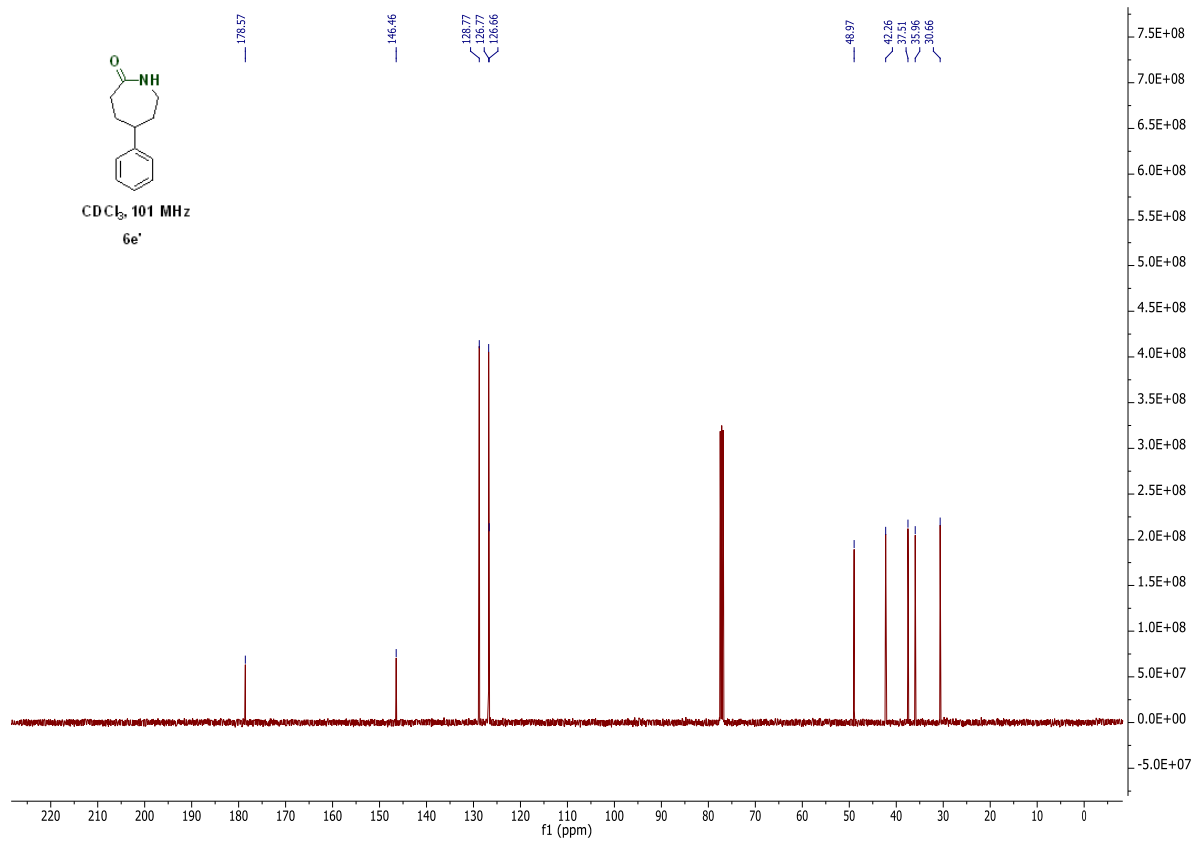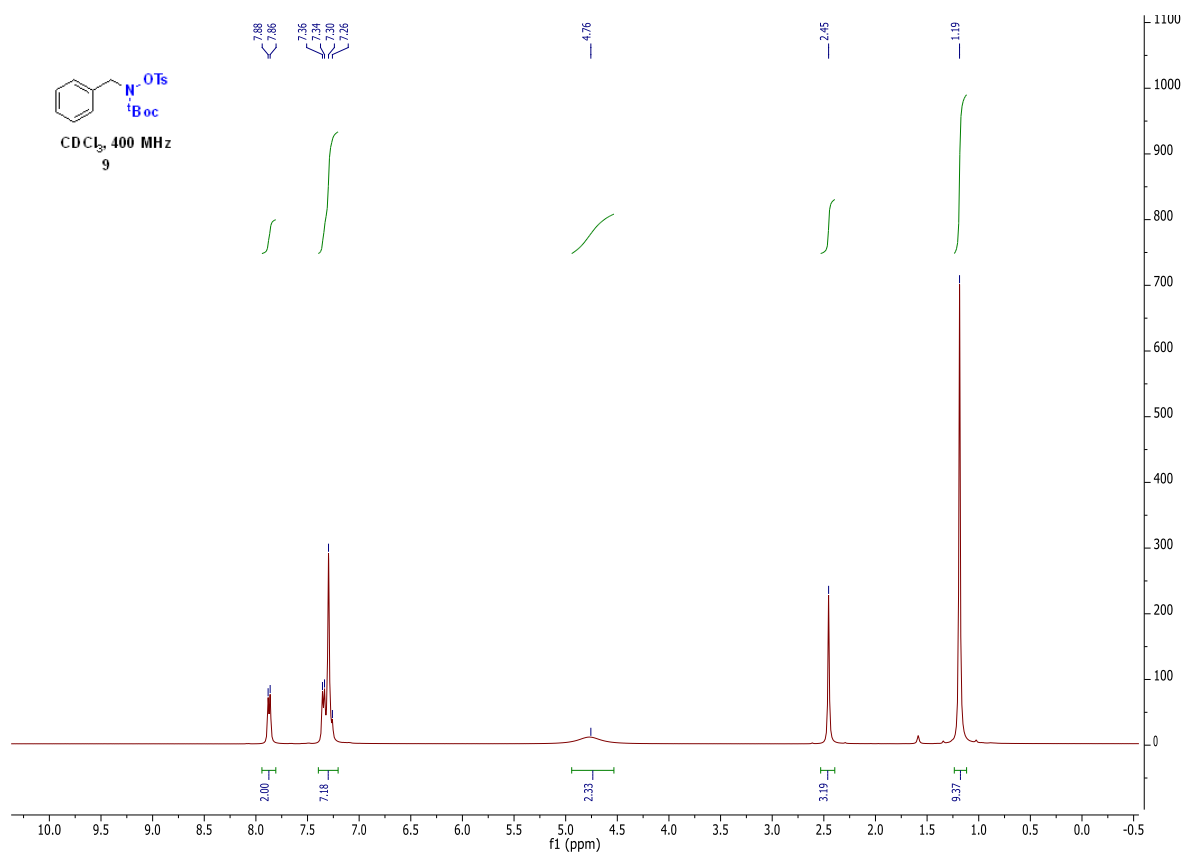

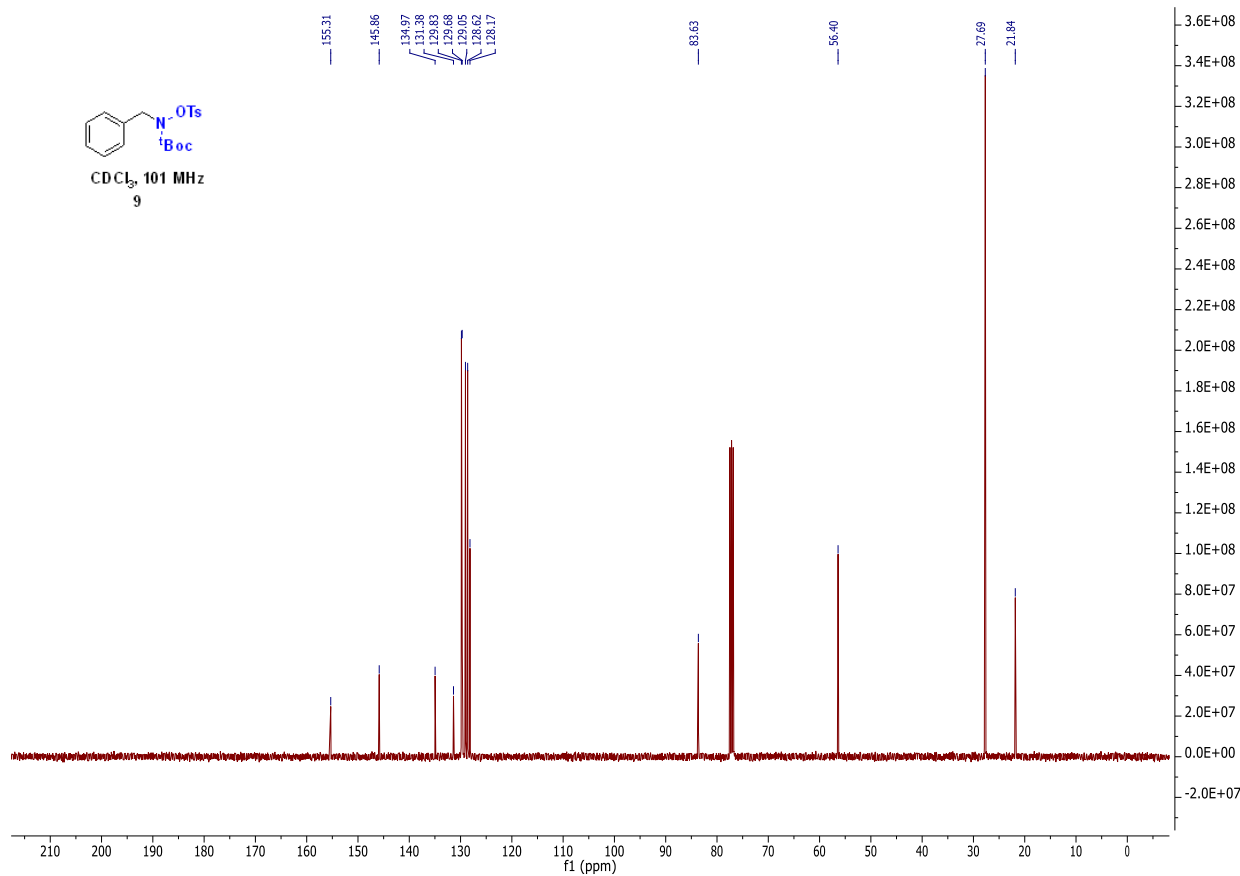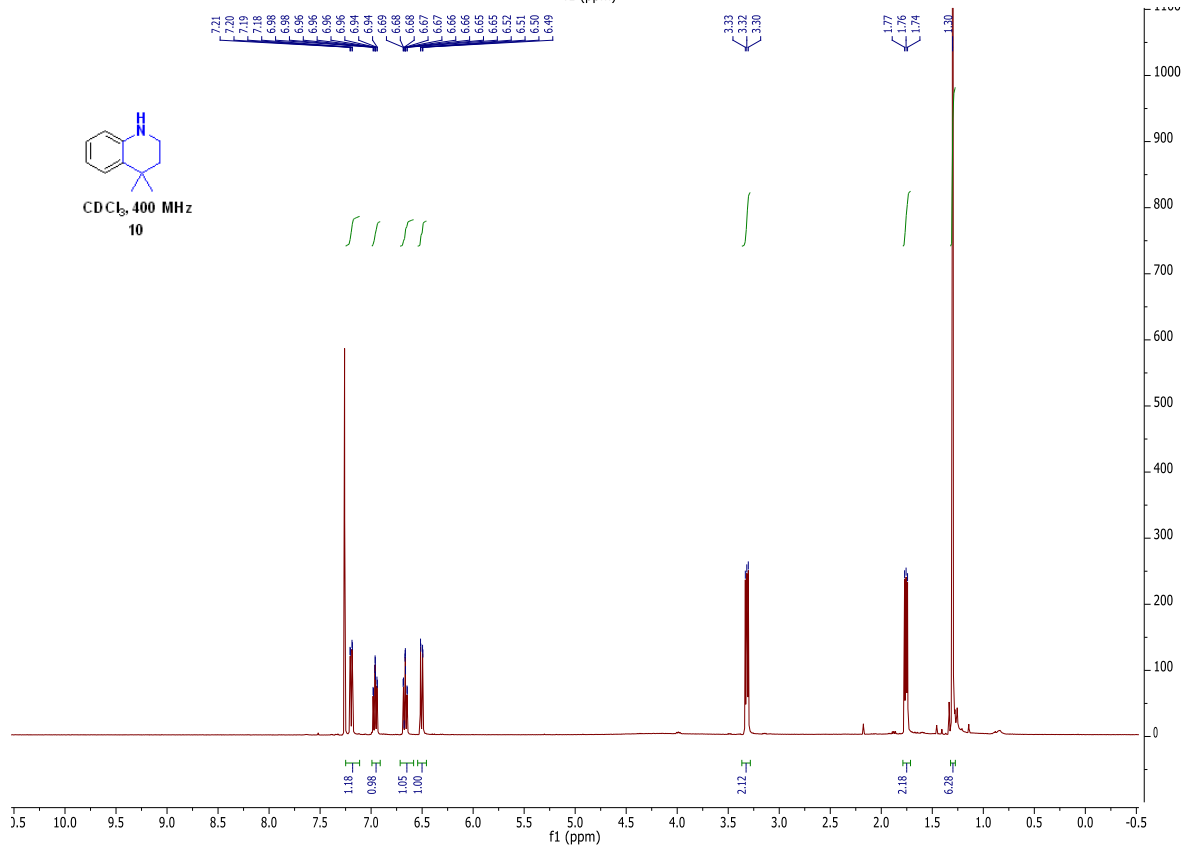

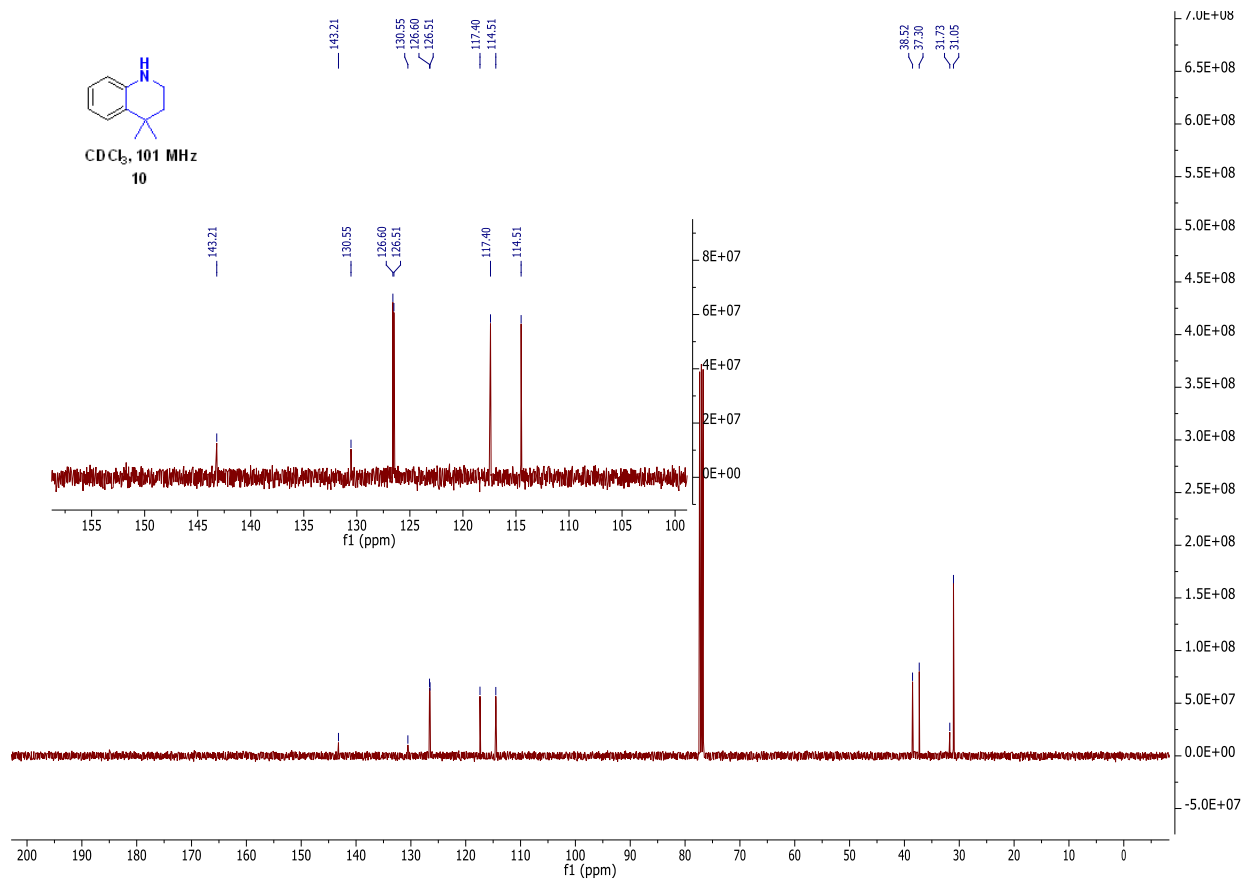

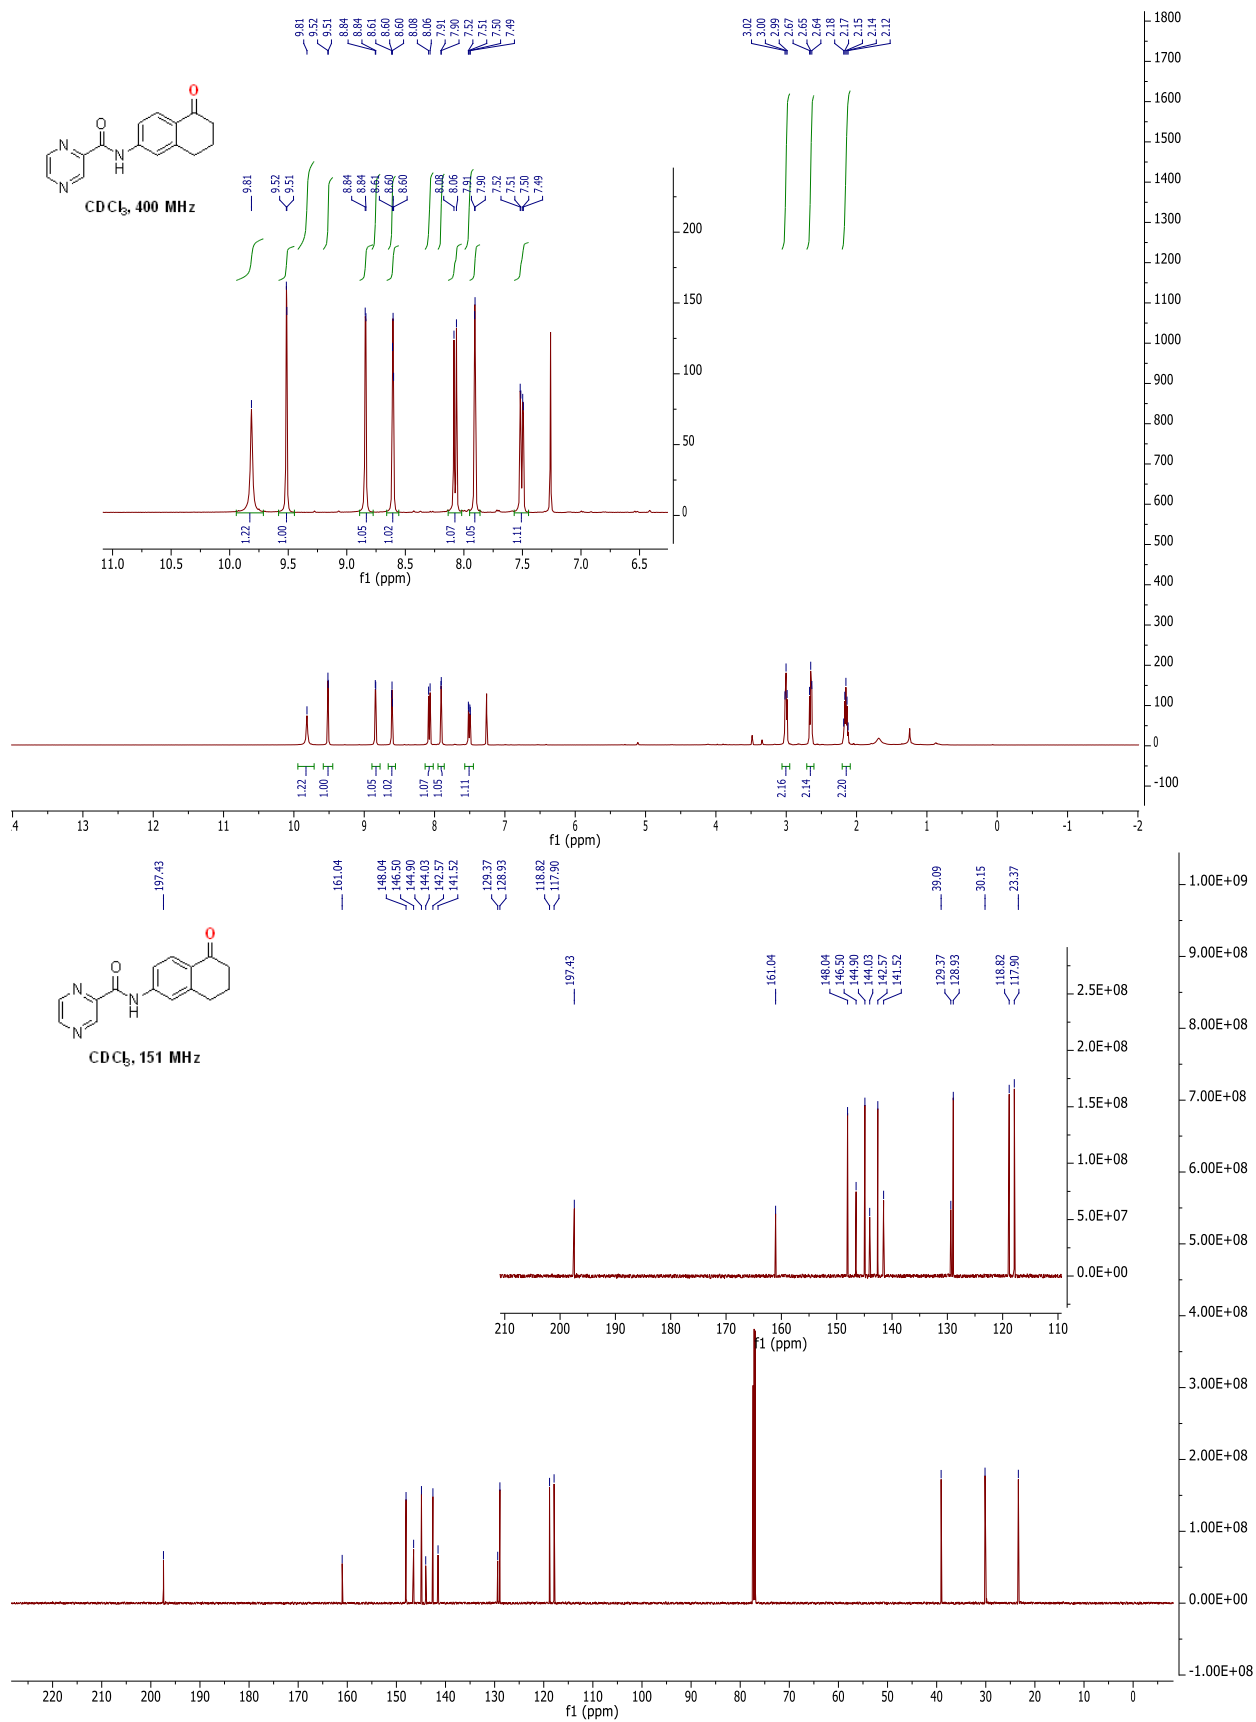

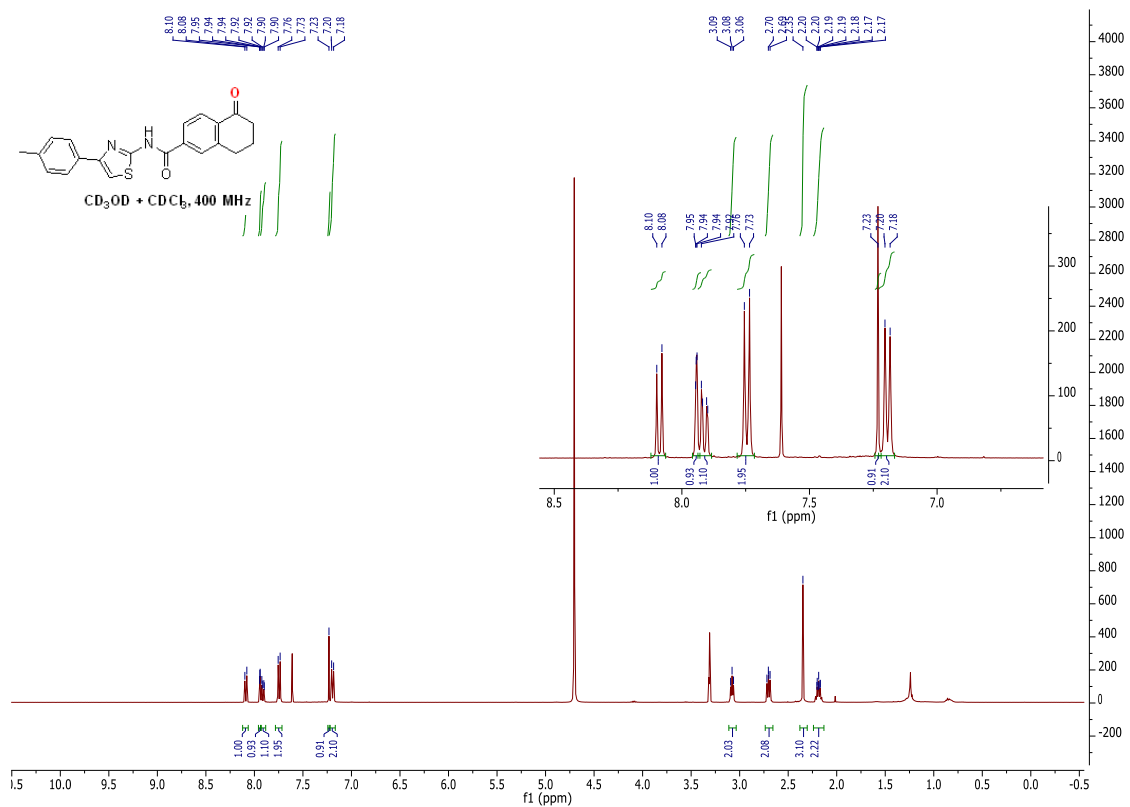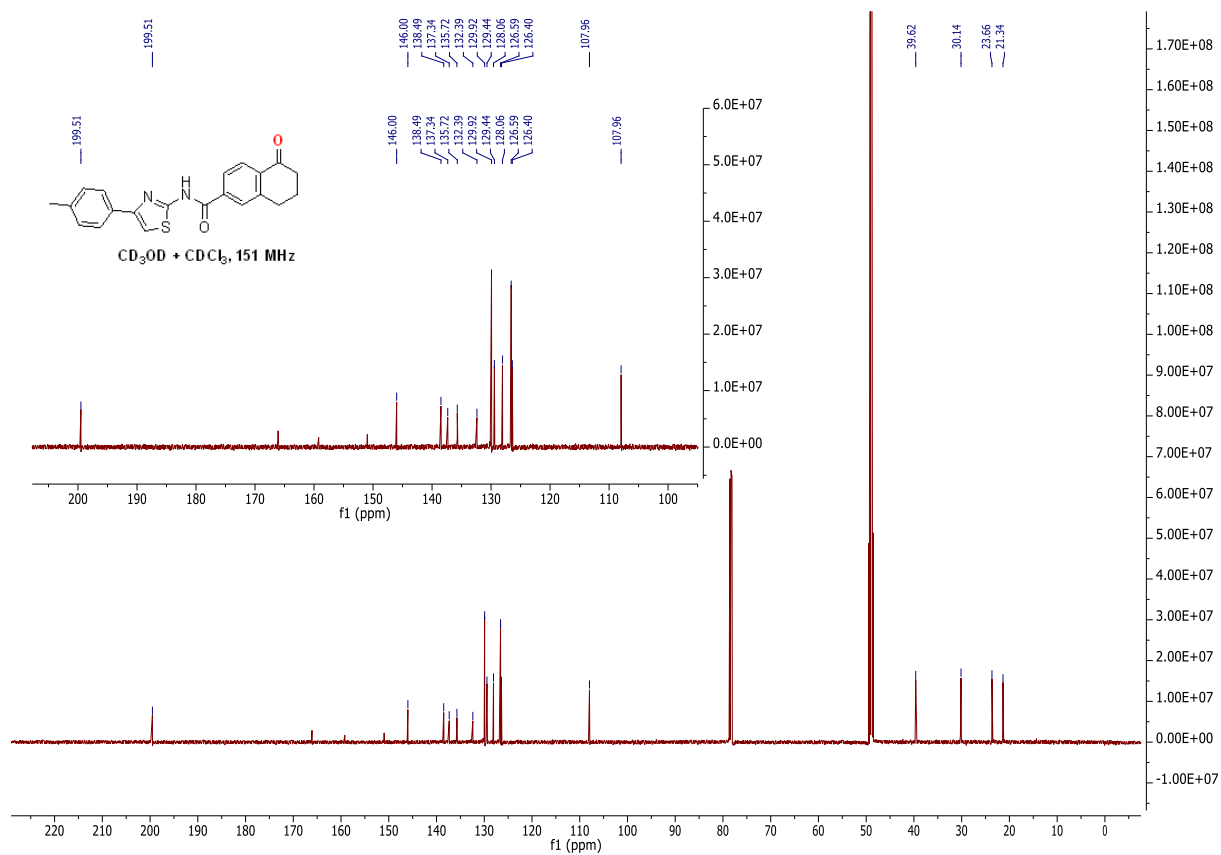

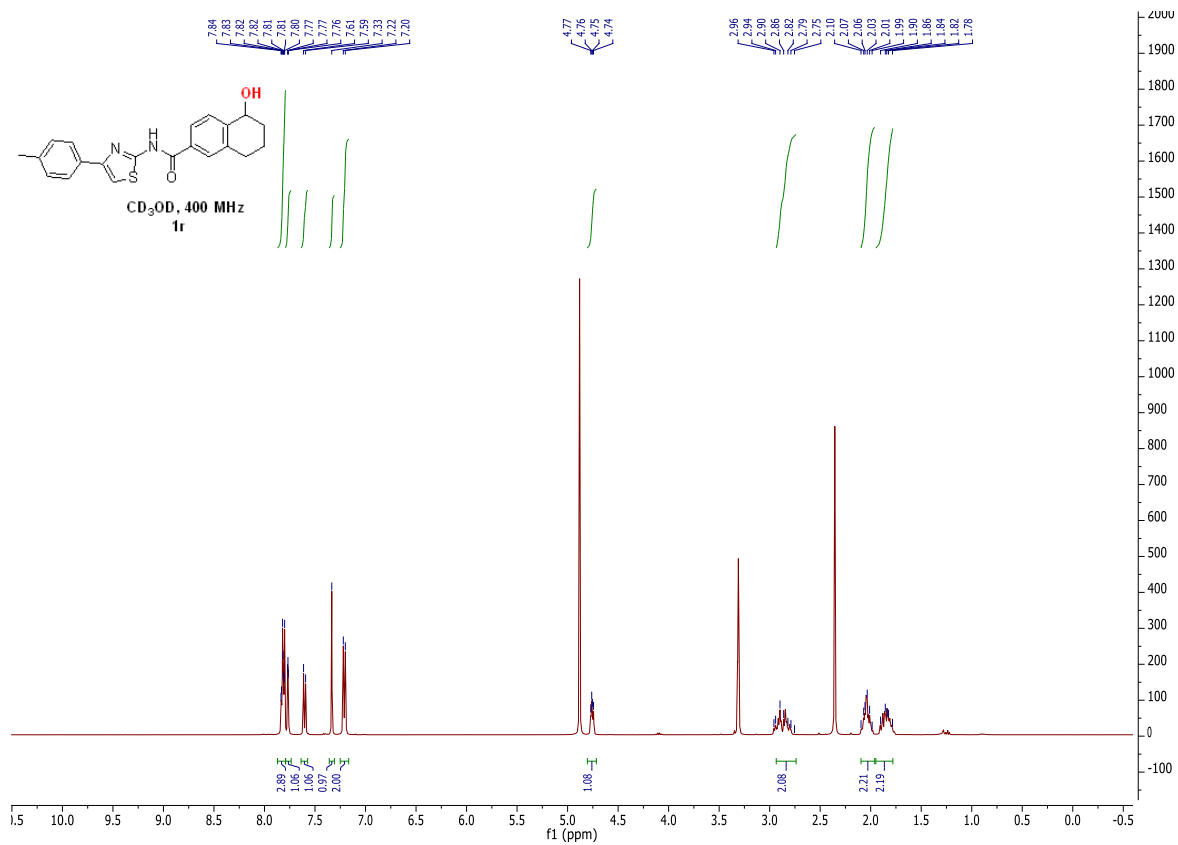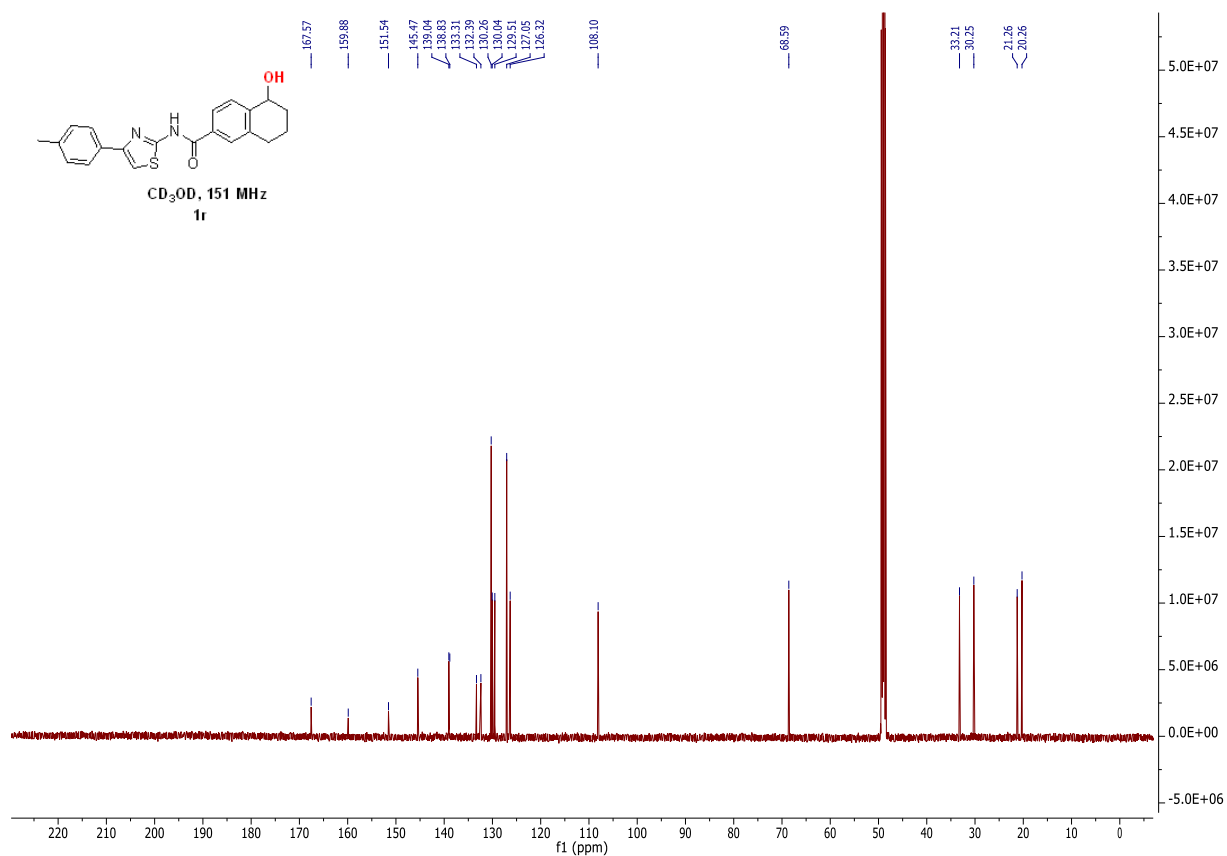

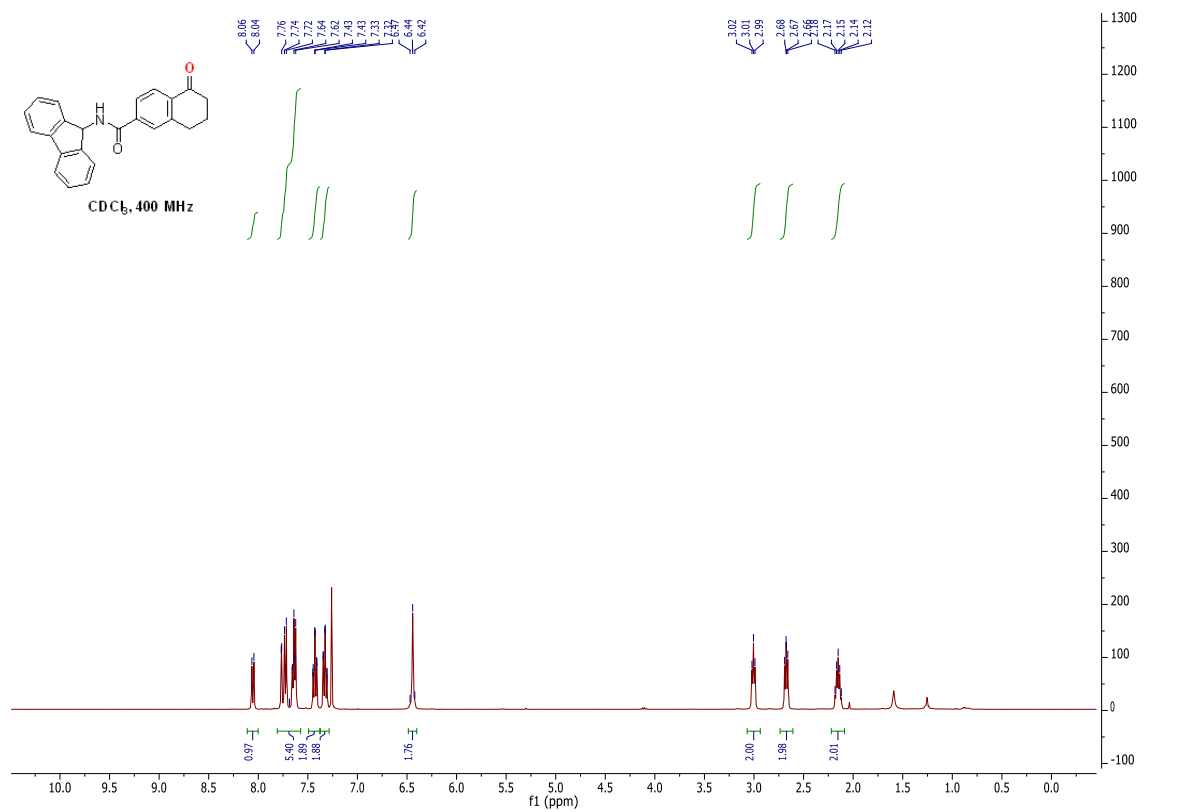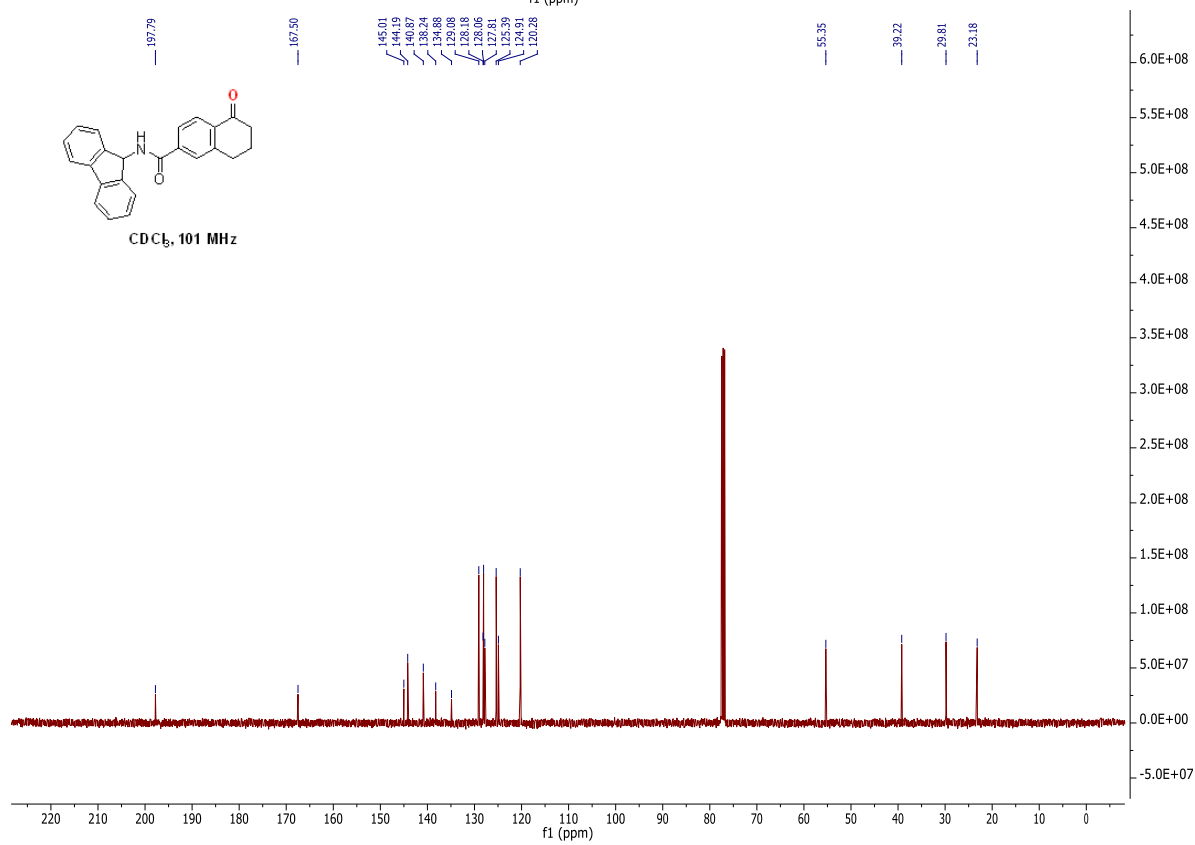

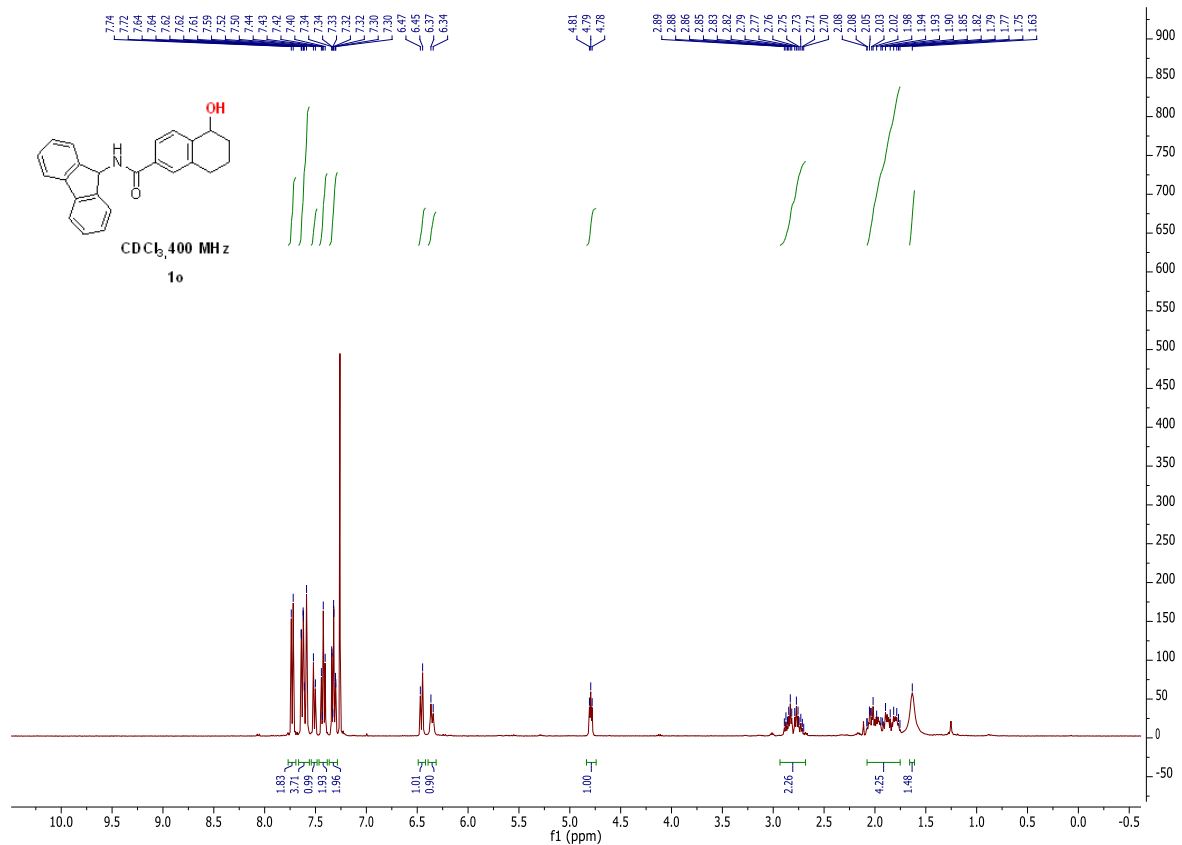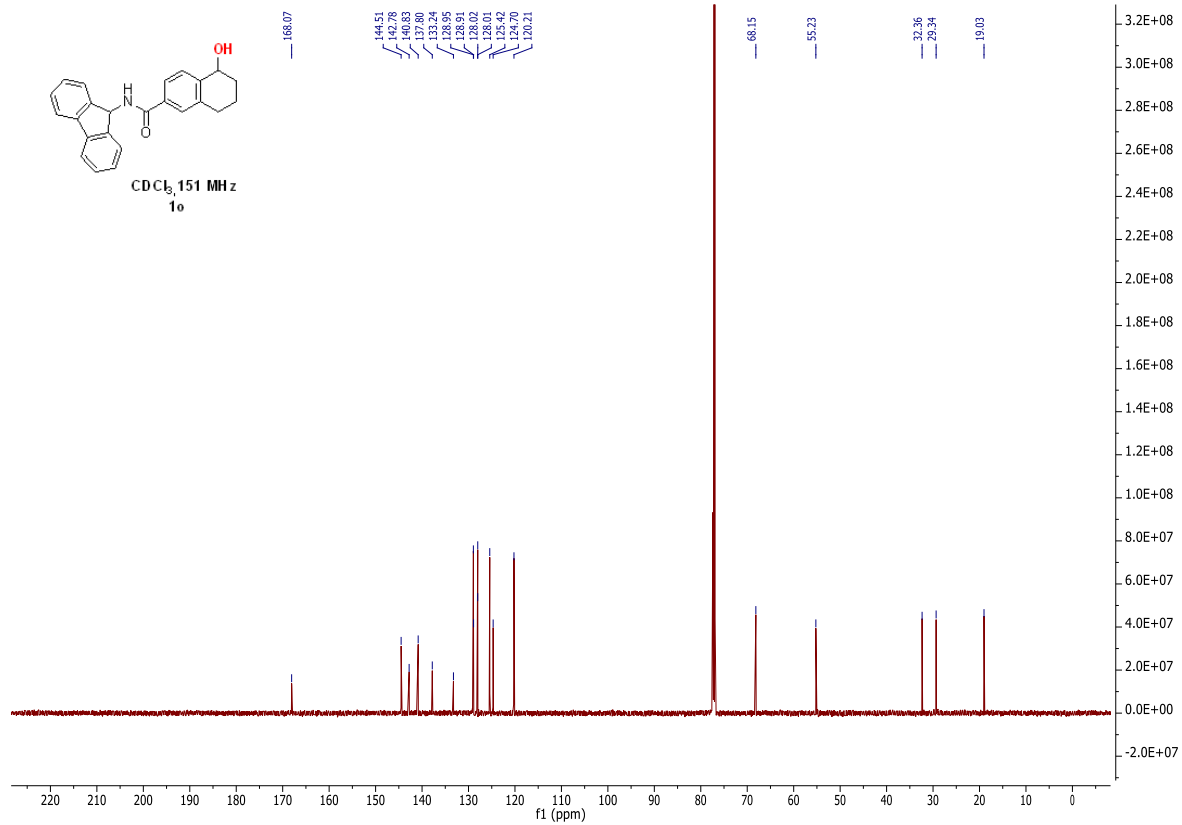



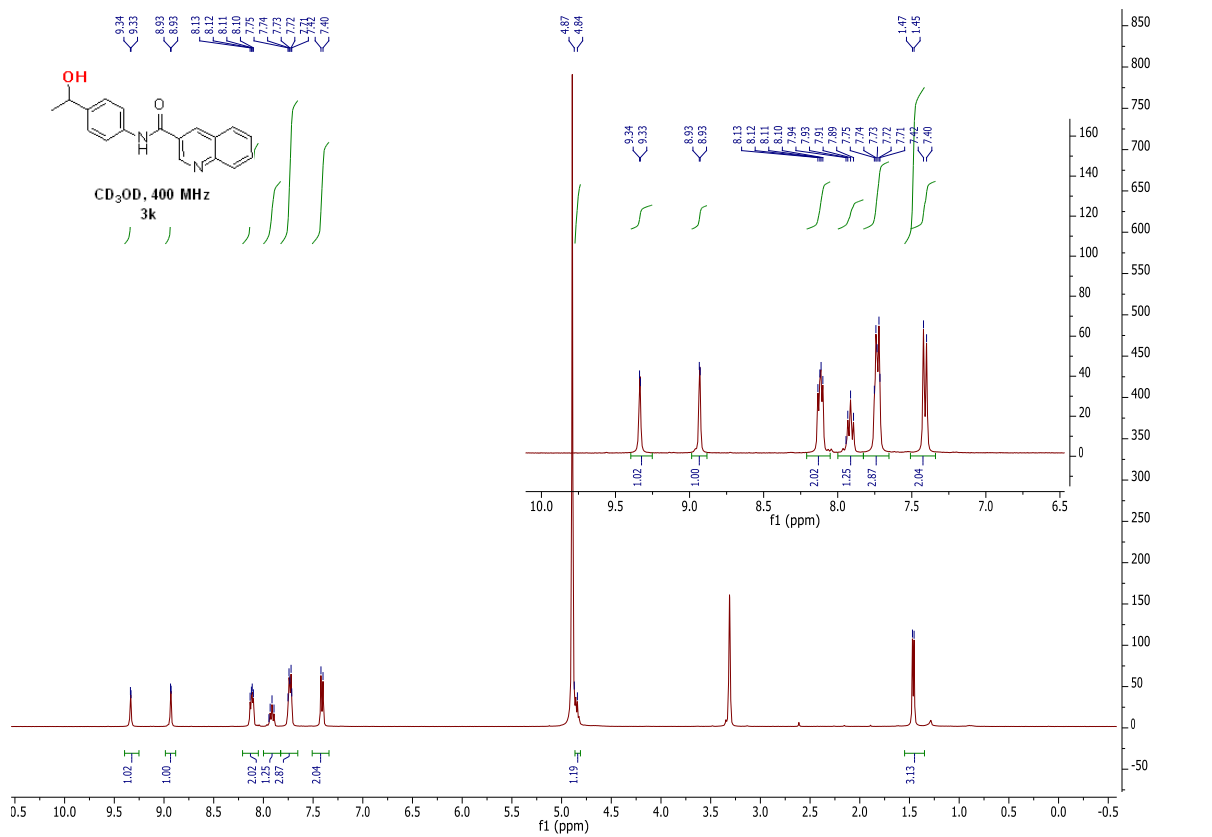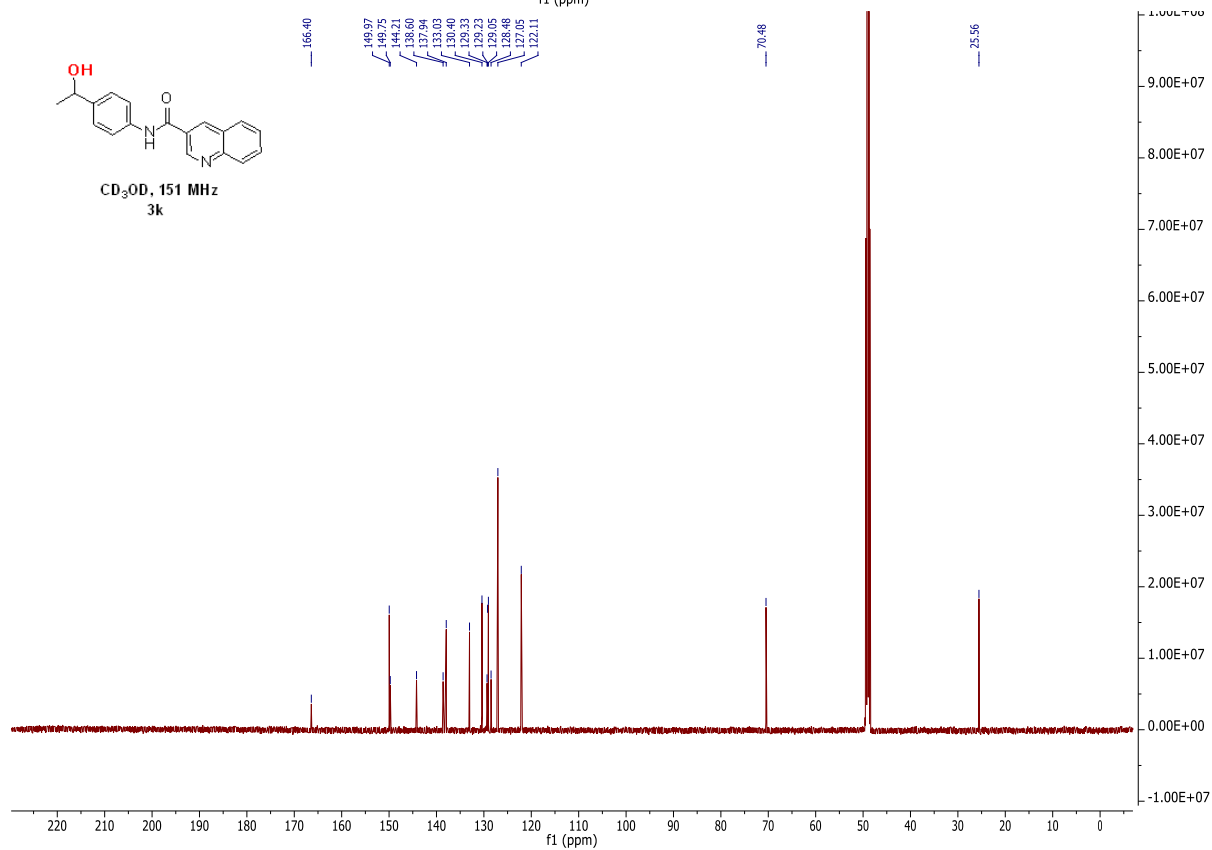

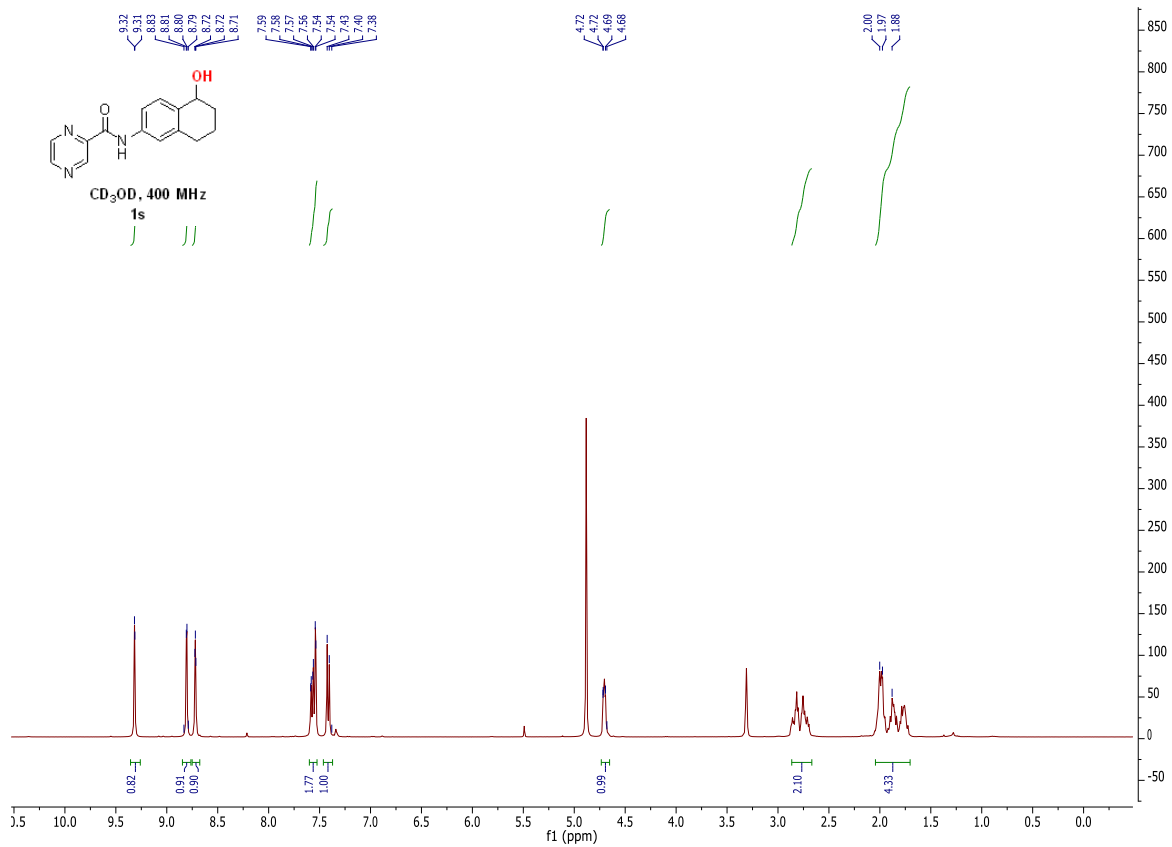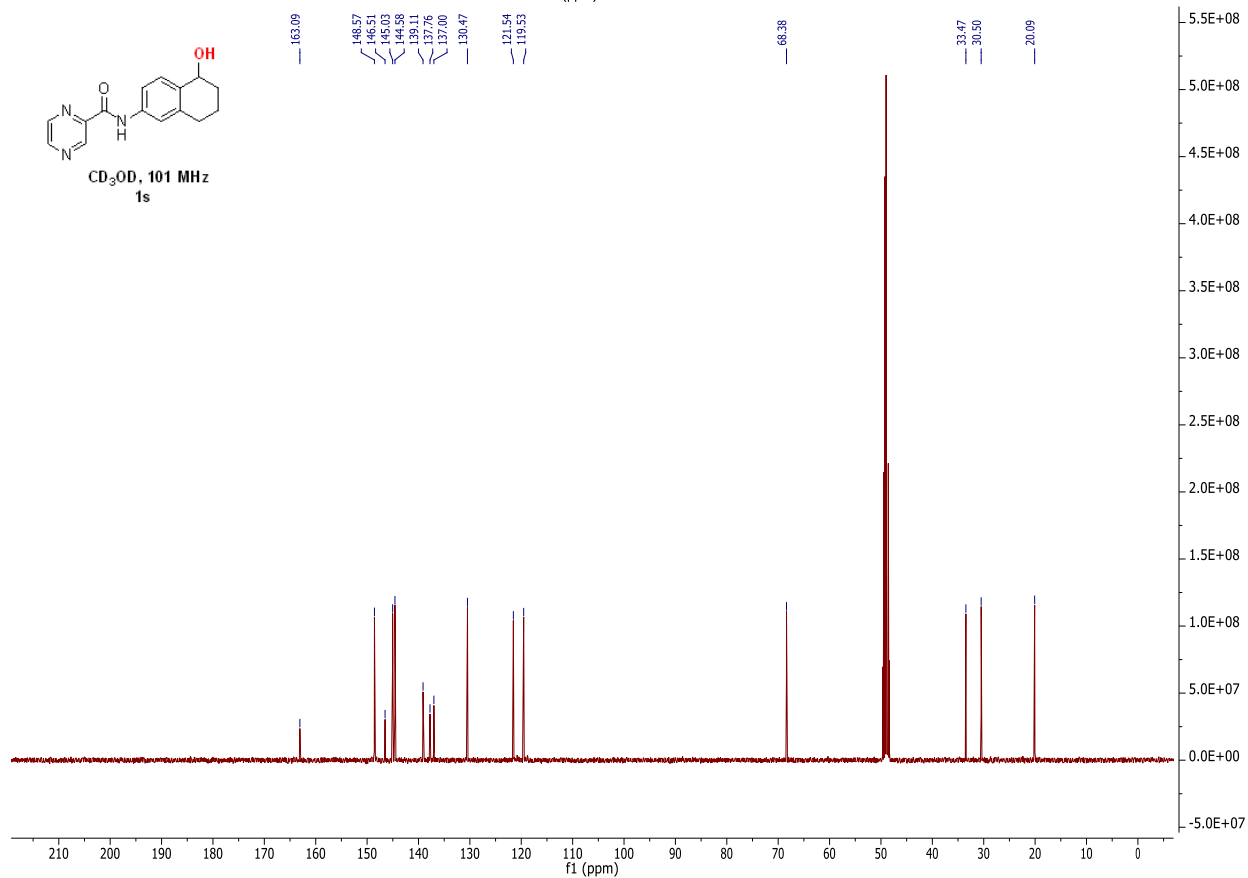

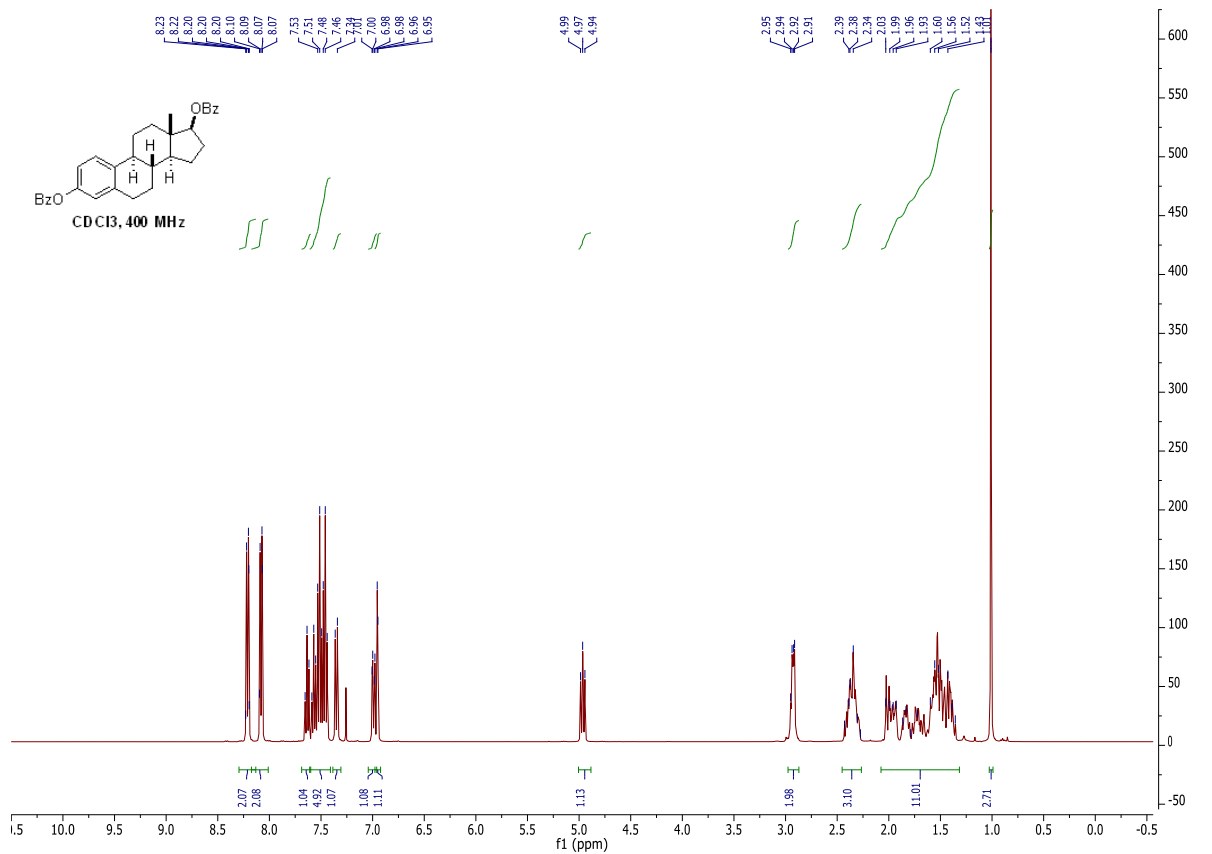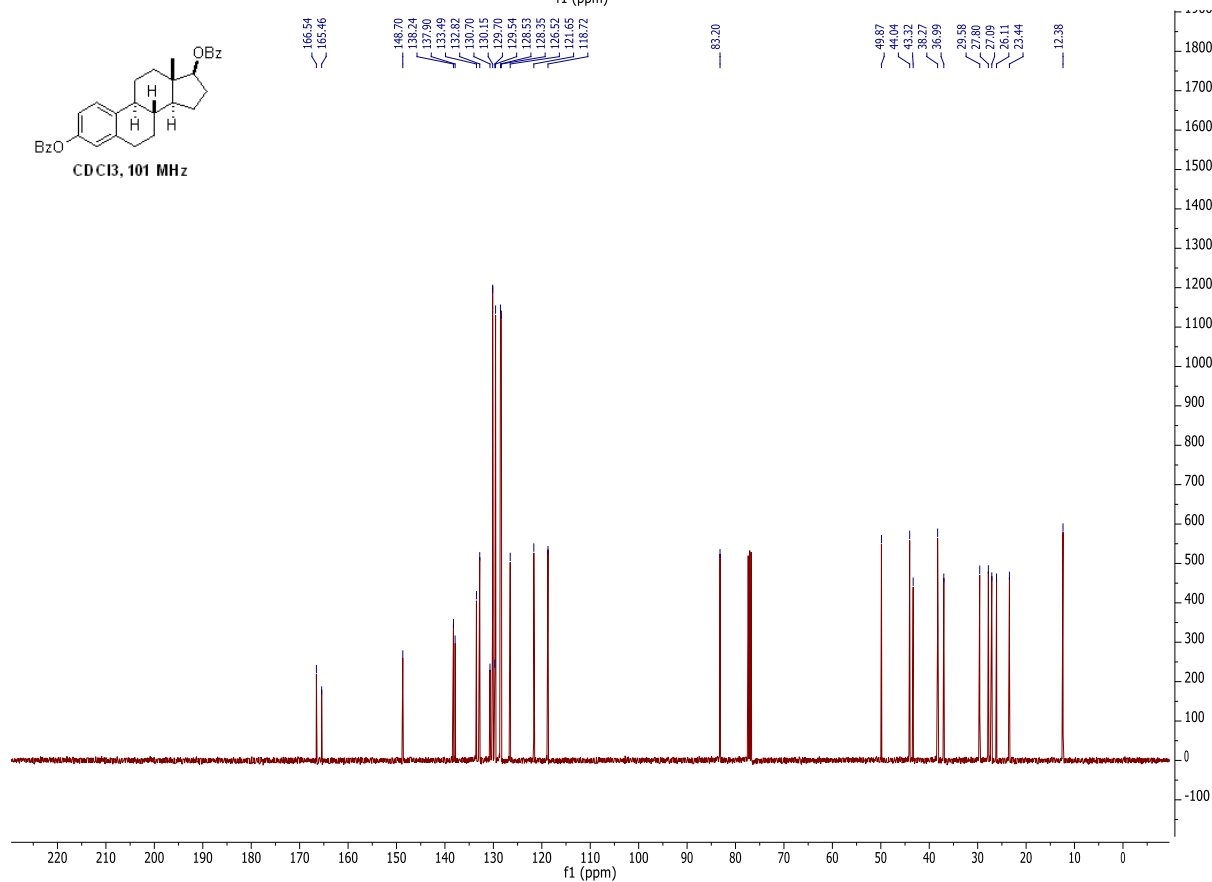



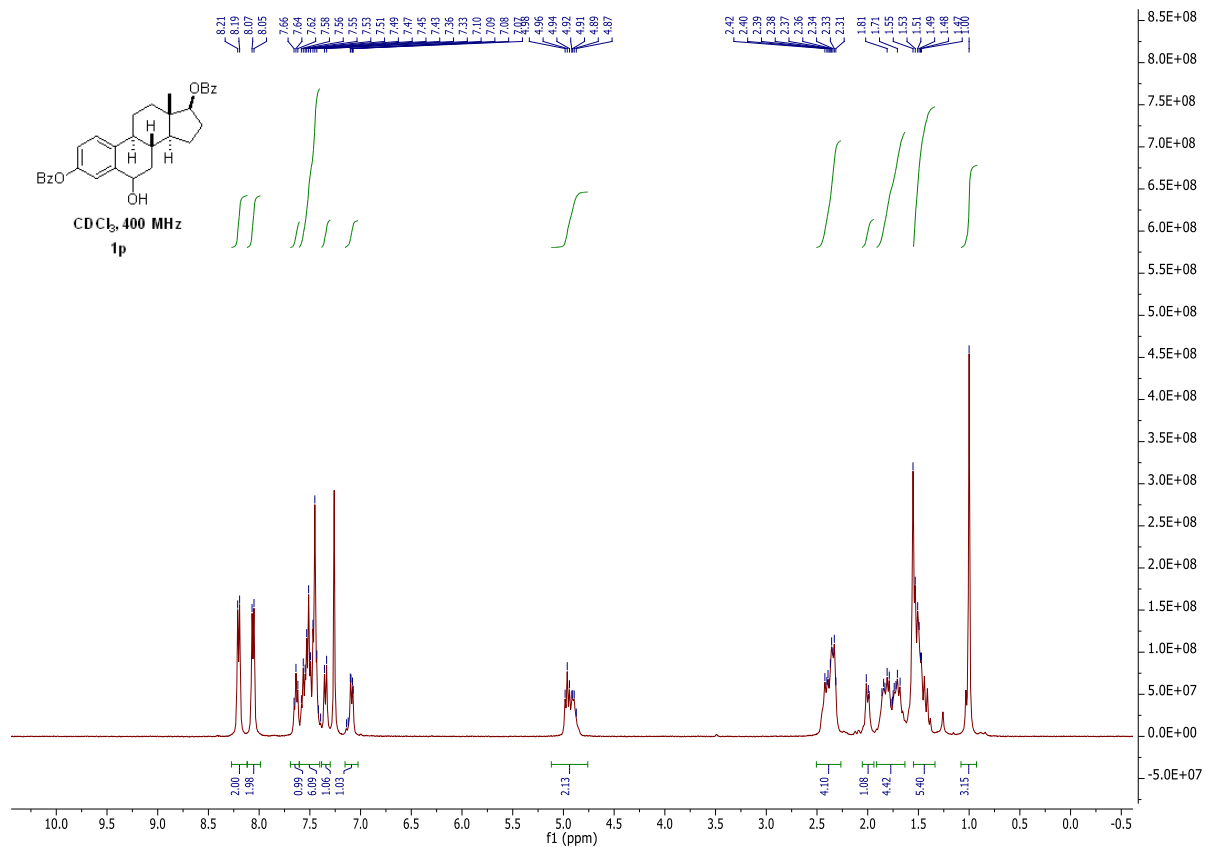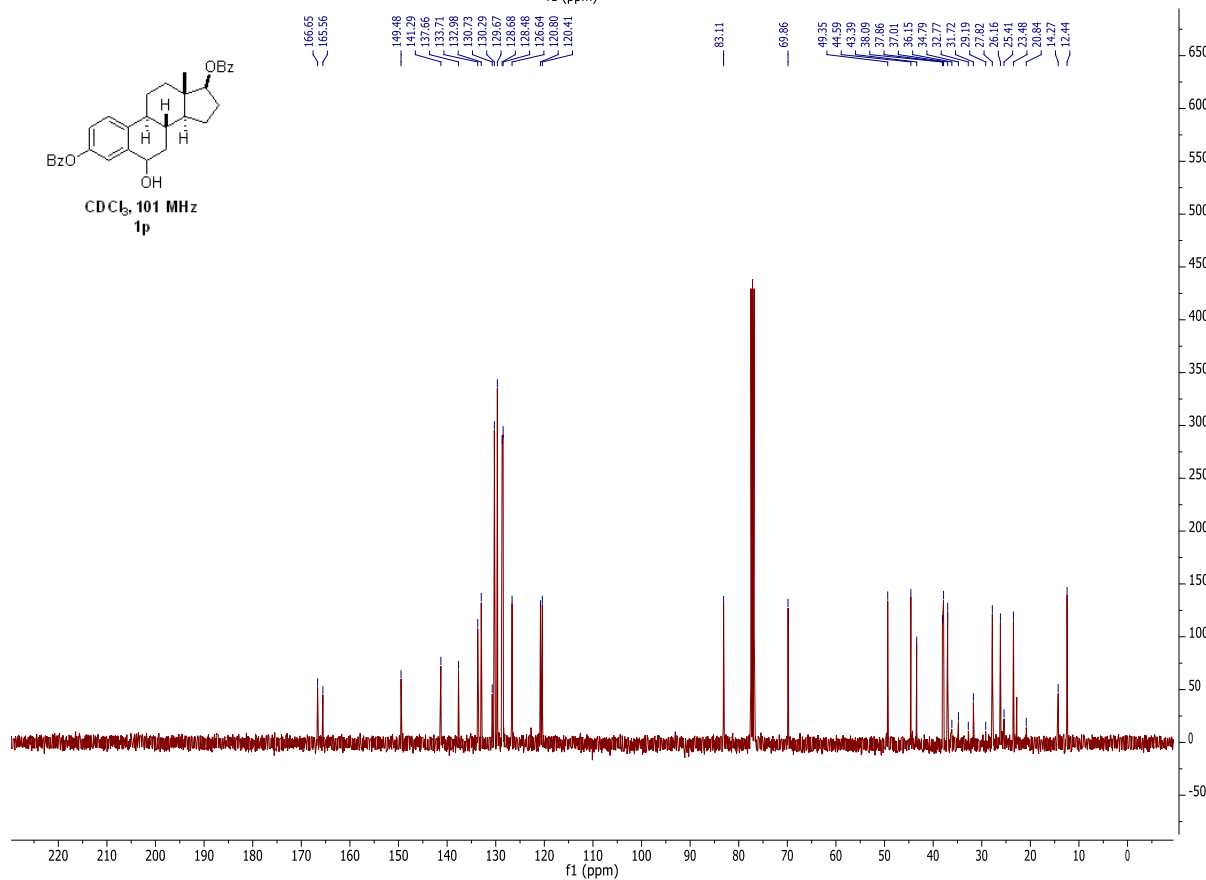

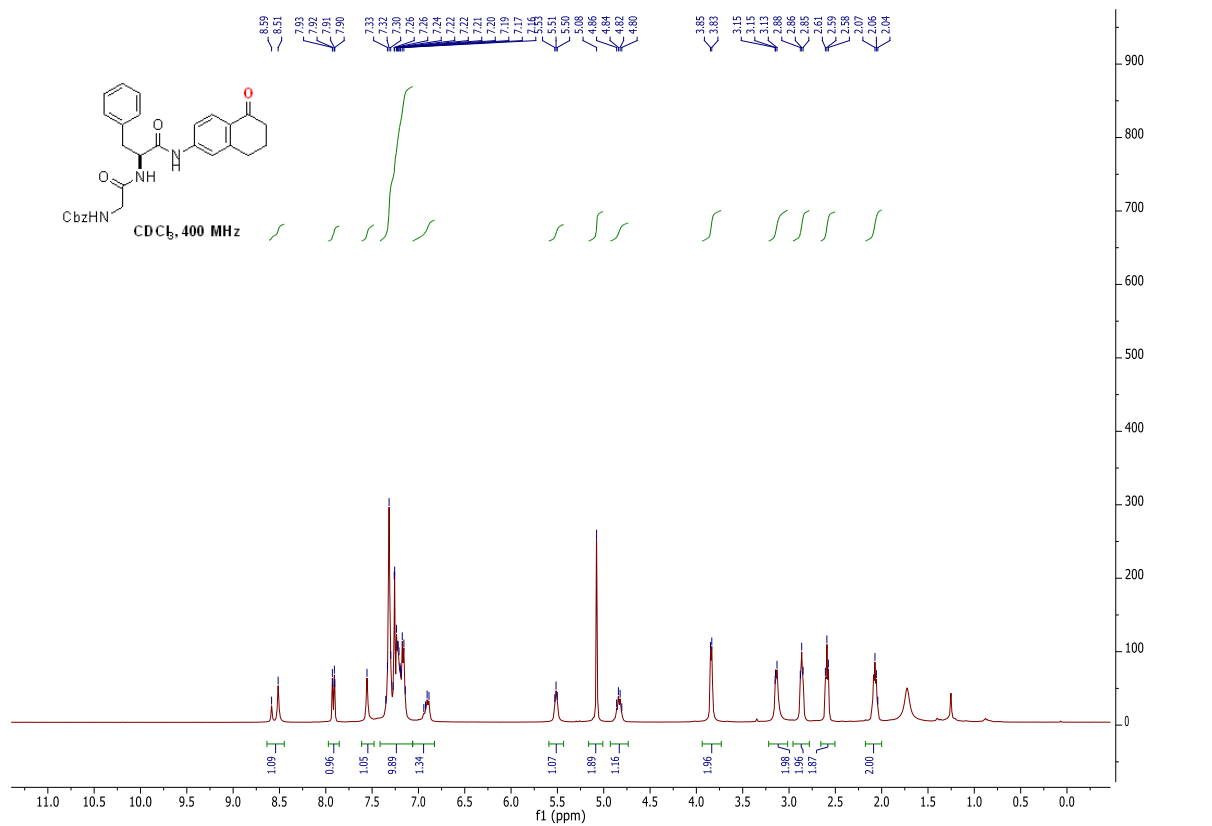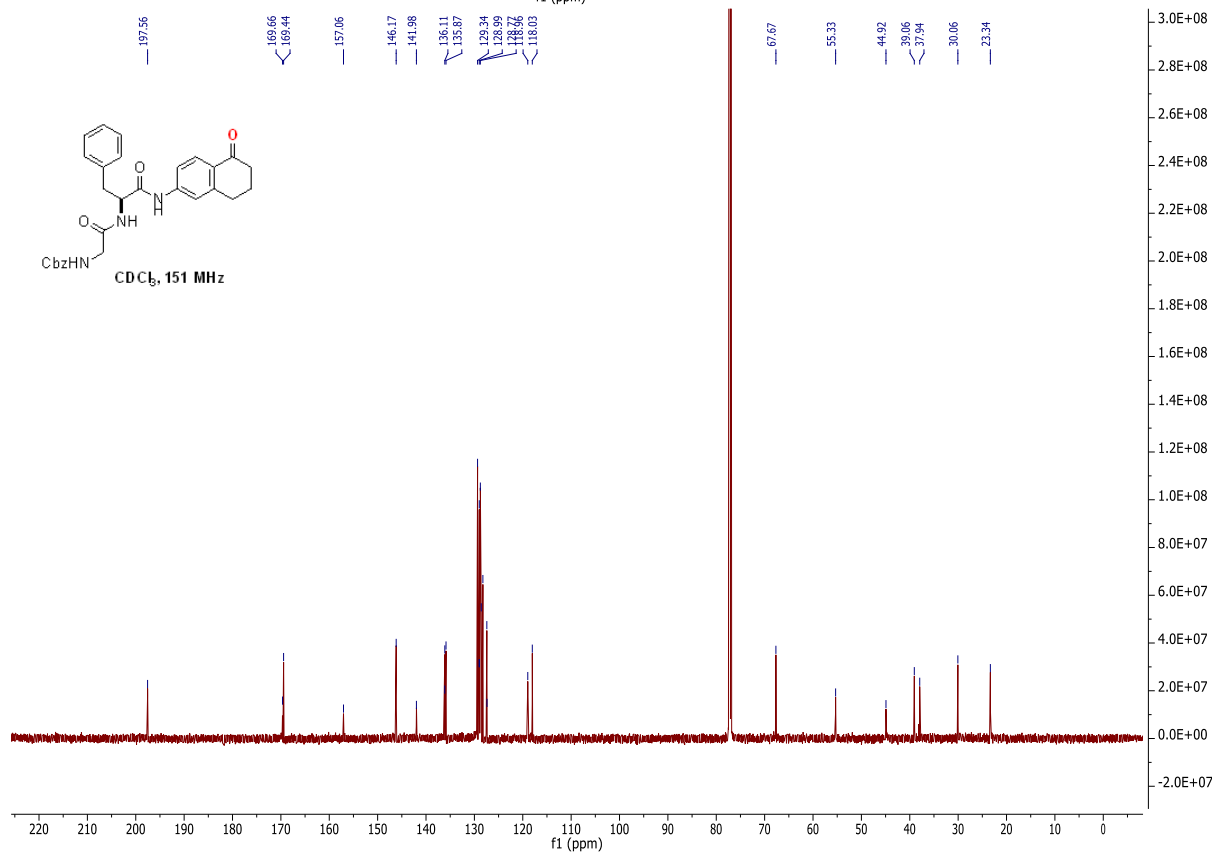

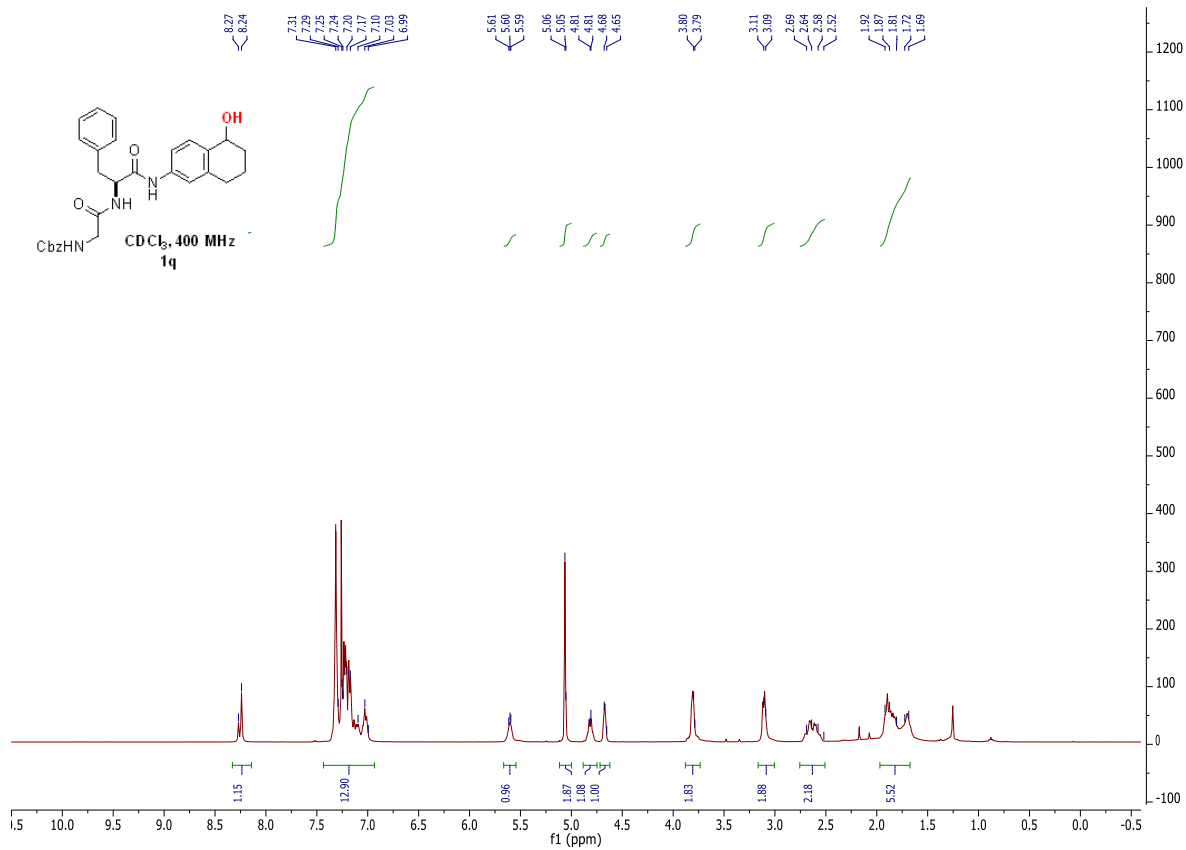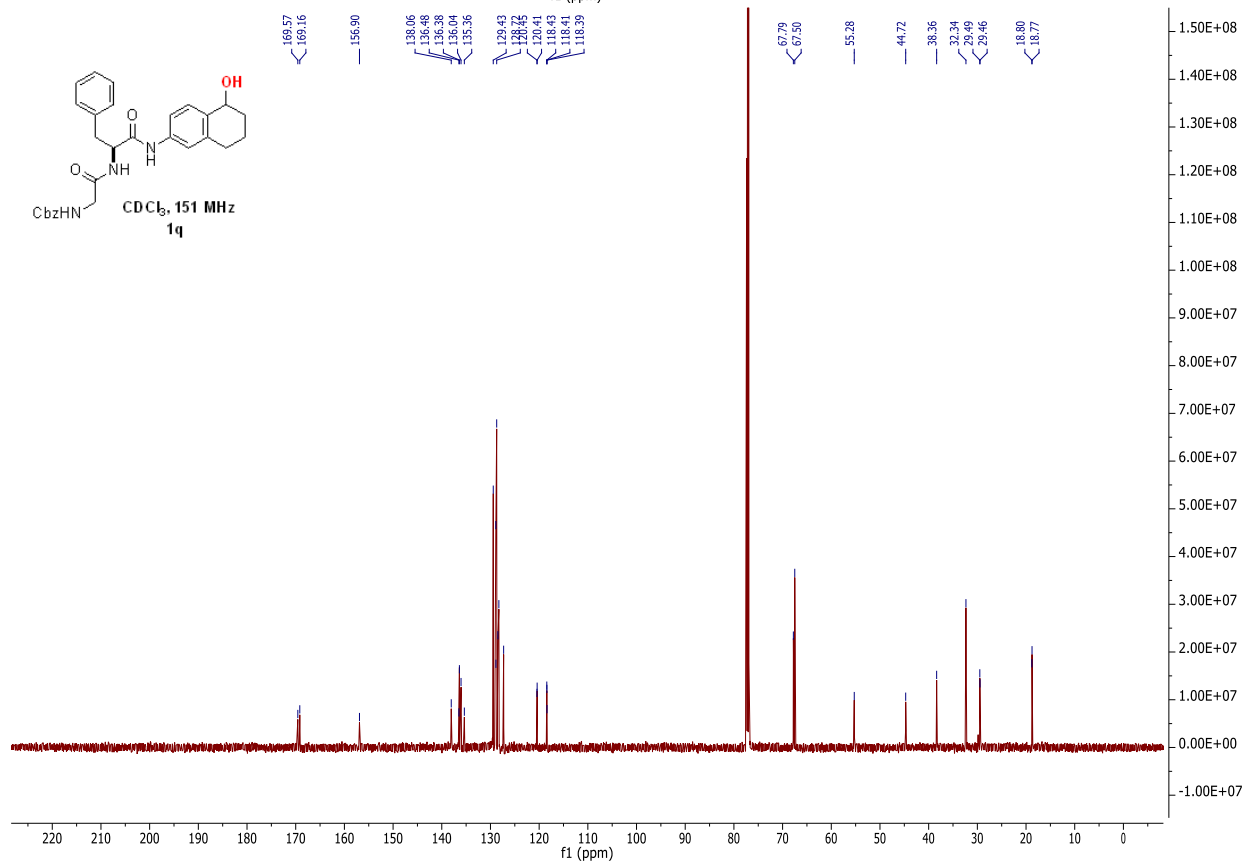

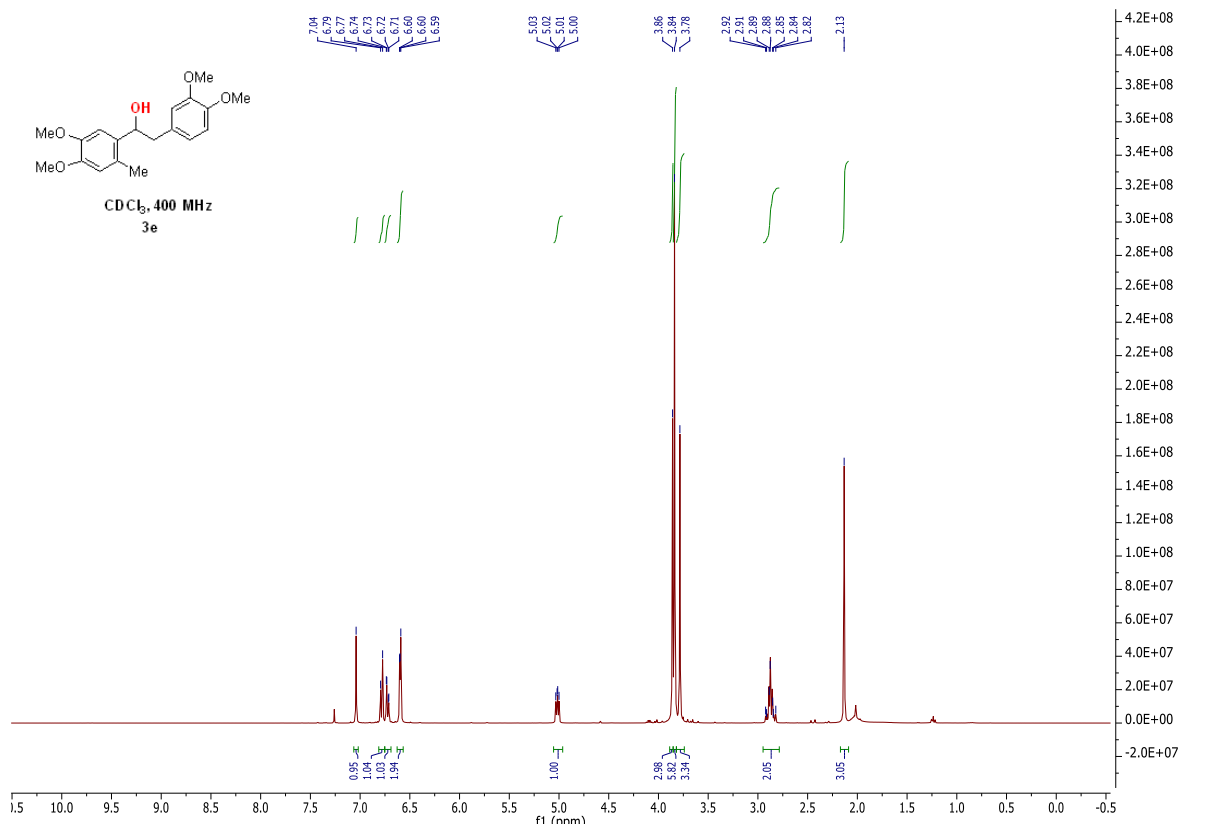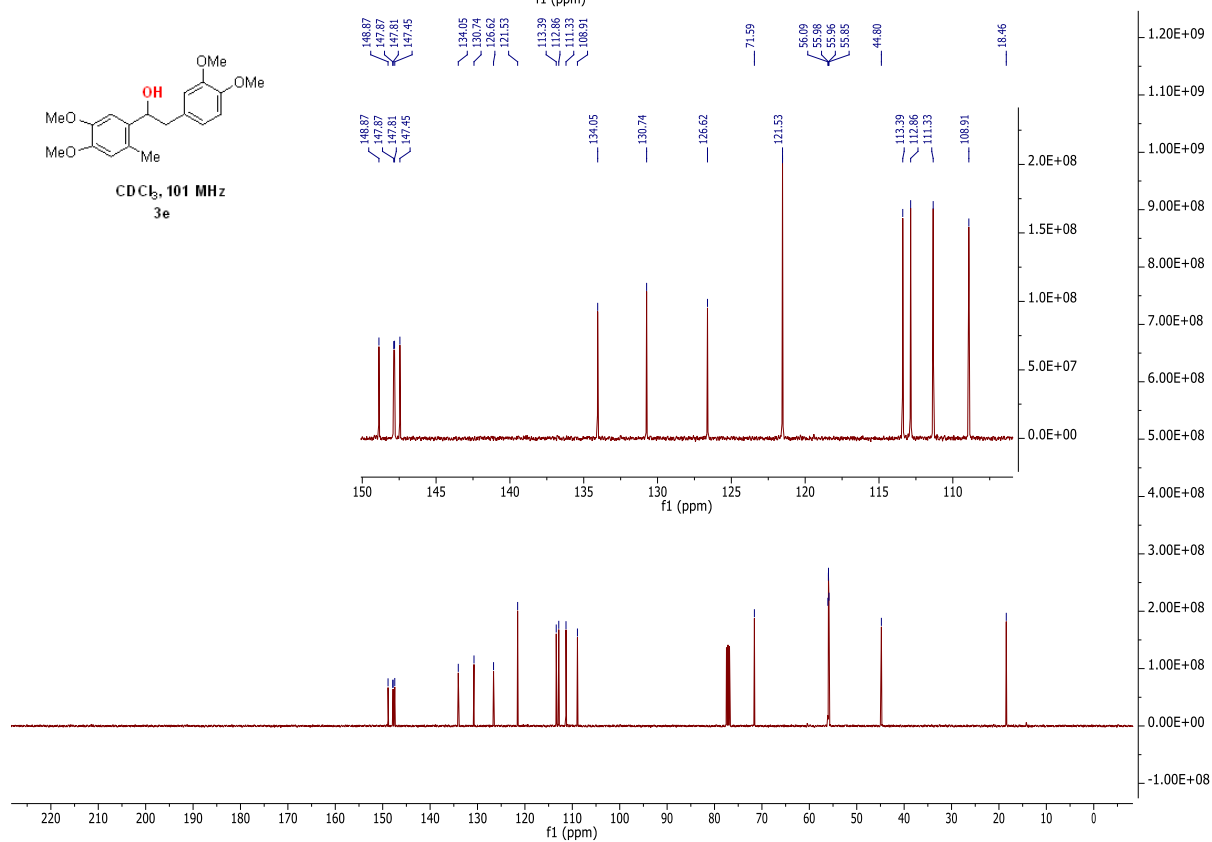



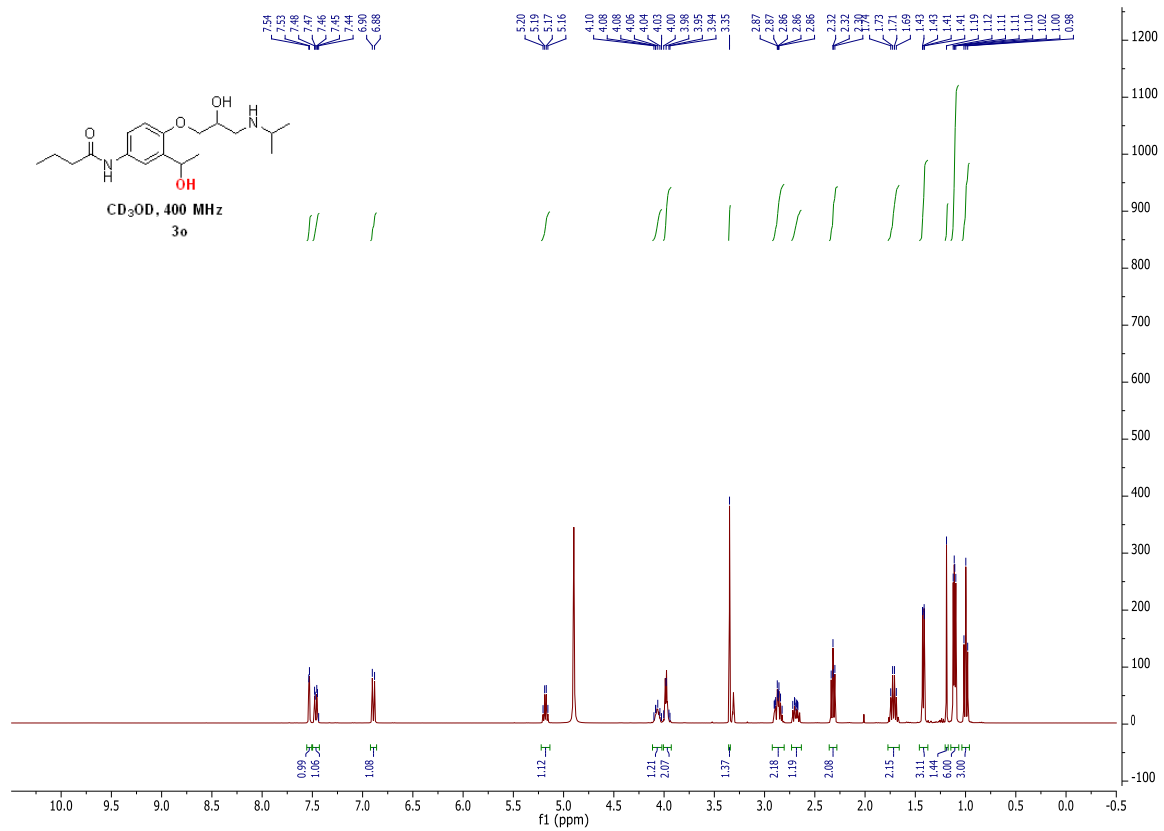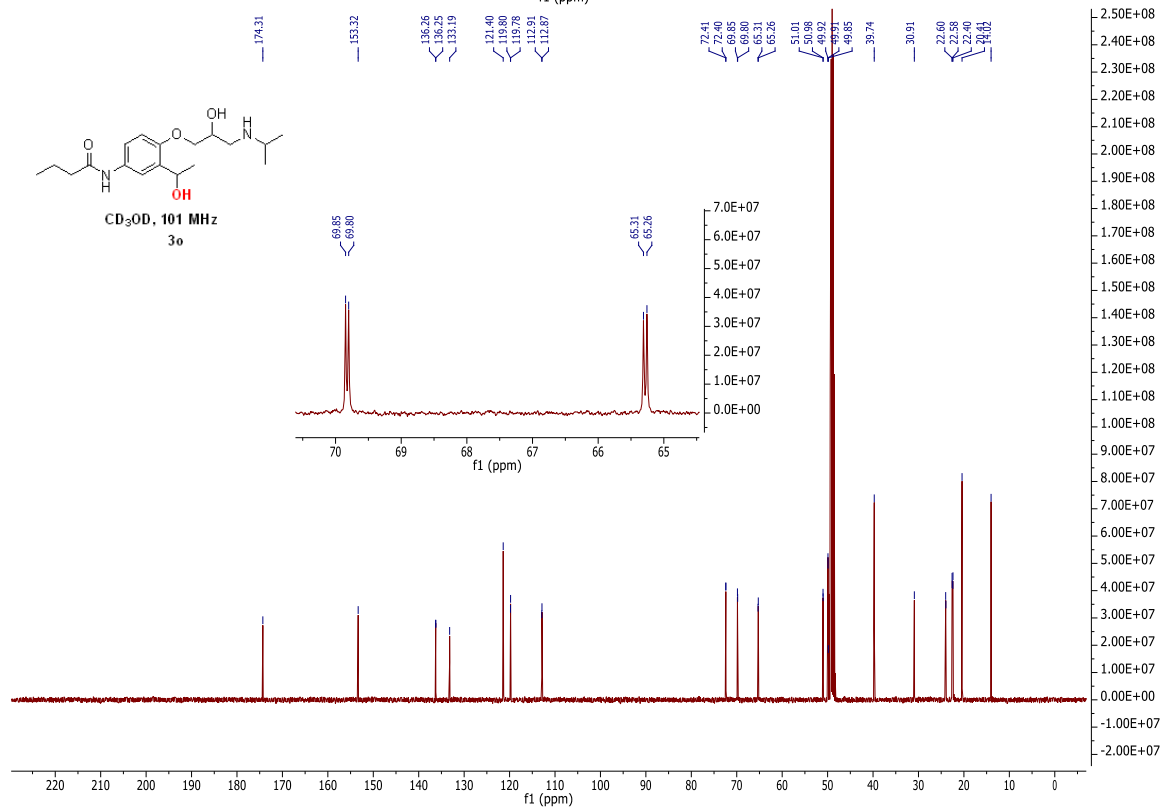

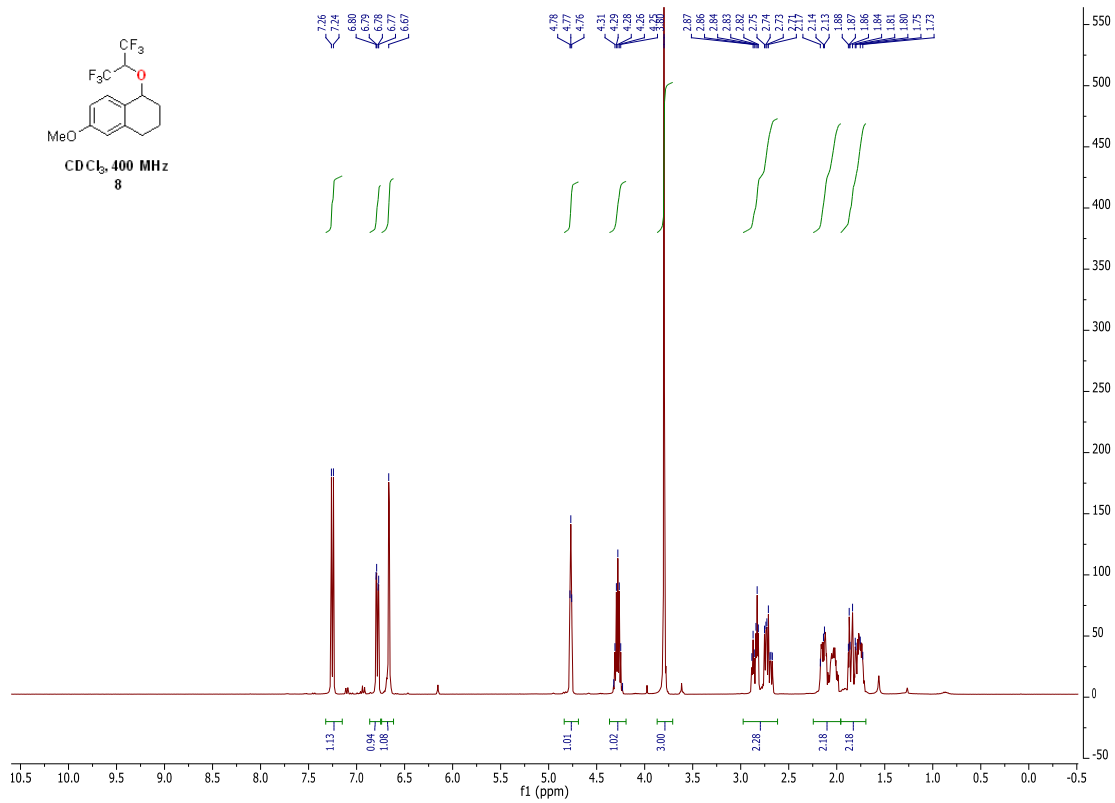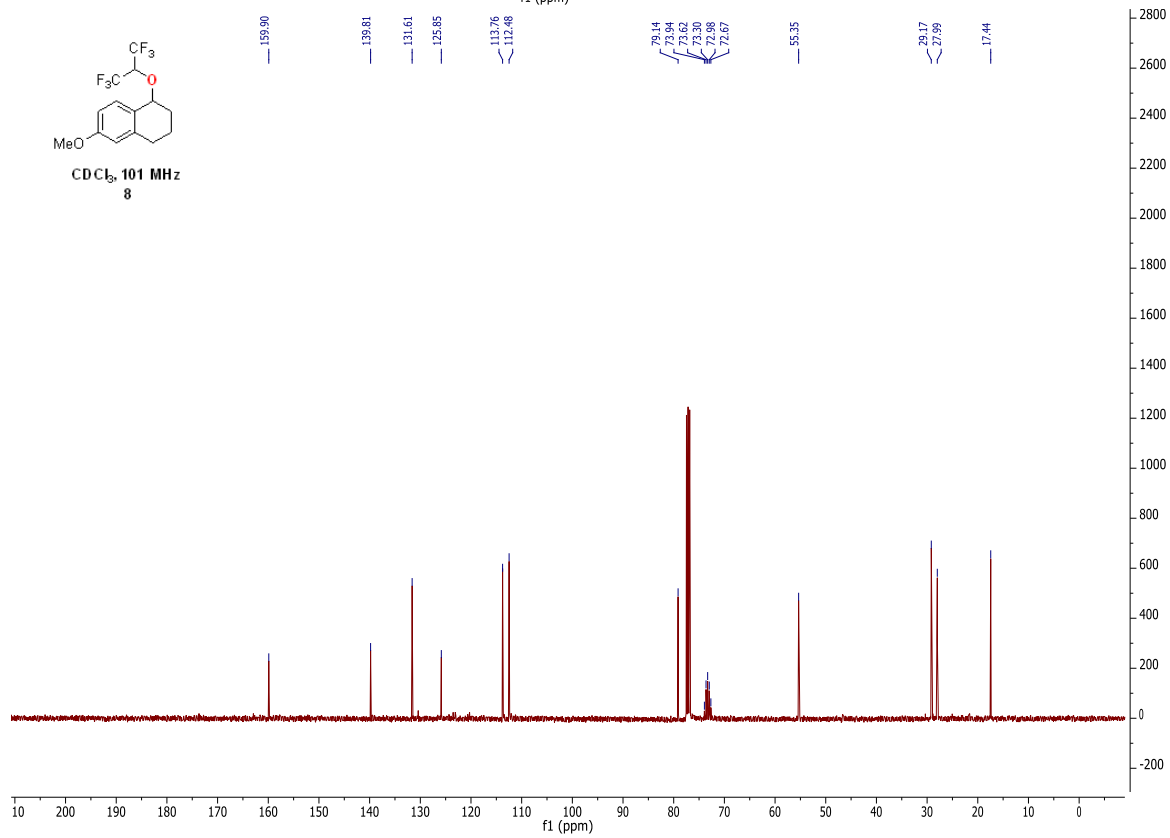

Supplement: d2sc00758d1.pdf [file d2sc00758d1.pdf]
